# Supplementary material for: Duration of Initial Viremia Modulates Functional Properties of HIV-specific T Cell Receptors
Source: Research Square preprint supplement (doi:10.21203/rs.3.rs-6668459/v1), 2026-02-18
Supplement: Supplementary file 1 [file 5f1ed4dd041c6817834da0b9.xlsx]

## Sheet: Late treated
PID_Visit Code	Days Post 1st Postive	IAMESIVIW (IW9)	KAYEKEVHNVW (KW11)	TSTLQEQIAW (TW10)
267_004	24	IATESIVIW	KAYEKEIHNIW	TSNLQEQVAW
		IATESIVIW	KAYEKEIHNIW	TSNLQEQVAW
		IATESIVIW	KAYEKEIHNIW	-
		IATESIVIW	KAYEKEVHNIW	TSNLQEQVAW
		IATESIVIW	KAYEKEIHNIW	TSNLQEQVAW
		IATESIVIW	-	TSNLQEQVAW
		IATESIVIW	KAYEKEIHNIW	TSNLQEQVAW
		IATESIVIW	KAYEKEIHNIW	TSNLQEQVAW
		IATESIVIW	KAYEKEVHNIW	-
		IATESIVIW	KAYEKEVHNIW	TSNLQEQVAW
		IATESIVIW	KAYEKEIHNIW	TSTLQEQIAW
		IATESIVIW	-	TSTLQEQIAW
		IATESIVIW	KAYEKEIHNIW	TSNLQEQVAW
		IATESIVIW	KAYEKEVHNIW	TSNLQEQVAW
036_006	37	IALESIVIW	KAYEKEVHNVW	TSTLQEQIAW
		IALESIVIW	KAYEKEVHNVW	TSTLQEQIAW
		IALESIVIW	KAYEKEVHNVW	TSTLQEQIAW
		IALESIVIW	-	TSTLQEQIAW
		IAMESIVIW	KAYEKEVHNVW	TSTLQEQIAW
		IALESIVIW	KAYEKEVHNVW	TSTLQEQIAW
		IALESIVIW	KAYEKEVHNVW	TSTLQEQIAW
		IALESIVIW	KAYEKEVHNVW	TSTLQEQIAW
198_003	18	VALESIVIW	KAYEKEVHNIW	TSTLQEQIAW
		VALESIVIW	KAYEKEVHNIW	TSTLQEQIAW
		VALESIVIW	-	TSTLQEQIAW
		VALESIVIW	KAYEKEVHNIW	TSTLQEQIAW
		VALESIVIW	KAYEKEVHNIW	TSTLQEQIAW
		VALESIVIW	KAYEKEVHNIW	TSNLQEQVAW
		VALESIVIW	KAYEKEVHNIW	TSTLQEQIAW
		-	KAYEKEVHNIW	-
		VALESIVIW	KAYEKEVHNIW	TSTLQEQIAW
		VALESIVIW	KAYEKEVHNIW	TSTLQEQIAW
		VALESIVIW	KAYEKEVHNIW	TSTLQEQIAW
		VALESIVIW	-	TSNLQEQVAW
		VALESIVIW	KAYEKEVHNIW	TSTLQEQIAW
		VALESIVIW	KAYEKEVHNIW	TSTLQEQIAW
		VALESIVIW	KAYEKEVHNIW	TSTLQEQIAW
		VALESIVIW	KAYEKEVHNIW	TSTLQEQIAW
309_003	15	IAIESIVIW	KAYEKEVHNVW	TSNLQEQIQW
		VALESIVIW	KAYEKEVHNVW	-
		VAIESIVIW	KAYEKEVHNVW	TSNLQEQIQW
		VAIESIVIW	KAYEKEVHNVW	TSTLQEQIAW
		VAIESIVIW	-	TSNLQEQIQW
		VAIESIVIW	KAYEKEVHNVW	TSNLQEQIQW
		VALESIVIW	KAYEKEVHNVW	TSNLQEQIQW
		VAMESIVIW	RAYEKEVHNVW	TSNLQEQIQW
		VAIESIVIW	KAYEKEVHNVW	-
		VAIESIVIW	KAYEKEVHNVW	TSNLQEQIQW
		VAIESIVIW	-	TSTLQEQIAW
		IAIESIVIW	KAYEKEVHNVW	TSNLQEQIQW
		VAIESIVIW	KAYEKEVHNVW	TSNLQEQIQW
208_007	42	IALESIVIW	KAYEKEVHNVW	TSTLQEQIAW
		IALESIVIW	KAYDTEKHNVW	TSTLQEQIAW
		IALESIVIW	KAYEKEVHNVW	-
		IALESIVIW	KAYEKEVHNVW	TSTLQEQIAW
		-	KAYEKEVHNVW	TSTLQEQIAW
		IALESIVIW	KAYEKEVHNVW	TSTLQEQIAW
		IALESIVIW	KAYDTEKHNVW	TSNLQEQIAW
		IALESIVIW	KAYDTEKHNVW	TSNLQEQIAW
		IALESIVIW	KAYDTEKHNVW	TSNLQEQIAW
		IALESIVIW	KAYDTEKHNVW	TSTLQEQIAW
		IALESIVIW	KAYDTEKHNVW	TSTLQEQIAW
		IALESIVIW	KAYDTEKHNVW	TSTLQEQIAW
		IALESIVIW	KAYDTEKHNVW	TSNLQEQIAW
		IALESIVIW	KAYDTEKHNVW	TSTLQEQIAW
		IALESIVIW	KAYDTEKHNVW	TSTLQEQIAW
272_05	28	IAMESIVIW	KAYEKEVHNVW	TSTLQEQIAW
		IAMESIVIW	KAYEKEVHNVW	TSTLQEQIAW
		IAMESIVIW	KAYEKEVHNVW	TSTLQEQIAW
		IAMESIVIW	-	TSTLQEQIAW
		-	-	TSTLQEQIAW
		IAMESIVIW	-	-
		IAMESIVIW	-	TSTLQEQIAW
		-	KAYEKEVHNVW	TSTLQEQIAW
		IAMESIVIW	KAYEKEVHNVW	TSTLQEQIAW
		IAMESIVIW	KAYEKEVHNVW	TSTLQEQIAW
		IAMESIVIW	KAYEKEVHNVW	TSNLQEQIAW
		VALESIVIW	KAYEKEVHNVW	TSTLQEQIAW
		VALESIVIW	KAYEKEVHNVW	TSTLQEQIAW
		IAMESIVIW	KAYEKEVHNIW	TSTLQEQIAW
		IAMESIVIW	-	-
		-	KAYEKEVHNVW	TSTLQEQIAW
		IAMESIVIW	KAYEKEVHNVW	TSTLQEQIAW
		IAMESIVIW	KAYEKEVHNVW	TSTLQEQIAW
		IAMESIVIW	KAYEKEVHNVW	TSTLQEQIAW
		VALESIVIW	KAYDTEKHNVW	TSNLQEQIAW
		IAMESIVIW	KAYEKEVHNVW	TSTLQEQIAW
		VALESIVIW	KAYEKEVHNVW	TSTLQEQIAW
		-	KAYEKEVHNVW	TSTLQEQIAW
		VALESIVIW	KAYEKEVHNVW	TSTLQEQIAW
		-	-	-
		IAMESIVIW	KAYEKEVHNVW	TSNLQEQIAW
		IAMESIVIW	KAYEKEVHNVW	TSNLQEQIAW
		IAMESIVIW	KAYEKEVHNVW	TSTLQEQIAW
		-	-	-
		-	KAYEKEVHNIW	TSNLQEQIAW
		-	KAYEKEVHNIW	TSNLQEQIAW

## Sheet: Early treated
PID_Visit Code	Days Post 1st Postive	IAMESIVIW (IW9)	KAYEKEVHNVW (KW11)	TSTLQEQIAW (TW10)
453_001	1.58333	ITLESIVIW	KAYEKEVHNVW	TSTLQEQIAW
		ITLESIVIW	KAYEKEVHNVW	TSTLQEQIAW
726_001	2.375	IAMESIVIW	KAYEKEVHNVW	TSTLQEQIAW
		IAMESIVIW	-	TSTLQEQIAW
		IAMESIVIW	KAYEKEVHNVW	TSTLQEQIAW
1401-002	6	IATESIVIW	KAYDTEVHNVW	TSTLQEQIAW
		IATESIVIW	-	TSTLQEQIAW
		-	KAYDTEVHNVW	TSTLQEQIAW
		IATESIVIW	KAYDTEVHNVW	-
		VALESIVIW	-	-
1335_003		IAMESIVIW	KAYEKEVHNVW	TSNLQEQVAW
		IAMESIVIW	KAYEKEVHNVW	-
		IAMESIVIW	-	TSNLQEQVAW
		-	KAYEKEVHNIW	TSNLQEQVAW
1585_001	2.375	IAMESIVIW	KAYEKEIHNIW	TSTLQEQIAW
1875_001	2	IAMESIVIW	KAYEKEVHNVW	TSNLQEQVAW
		-	KAYEKEVHNVW	-
		IAMESIVIW	-	TSTLQEQIAW
		-	KAYEKEVHNIW	TSNLQEQVAW
		IAMESIVIW	KAYEKEVHNVW	TSNLQEQIAW
