# Supplementary material for: Duration of Initial Viremia Modulates Functional Properties of HIV-specific T Cell Receptors
Source: Research Square preprint supplement (doi:10.21203/rs.3.rs-6668459/v1), 2026-02-18
Supplement: Supplementary file 2 [file 685ac3d3bd2afe00903eee46.xlsx]

## Sheet: Effects
Covariate	Covariate		Cell Type	Cell Type	HDI 3%	HDI 97%	SD	Inclusion probability	Final Parameter @ FDR 0.05	Expected Sample @ FDR 0.05	log2-fold change @ FDR 0.05	Final Parameter @ FDR 0.1	Expected Sample @ FDR 0.1	log2-fold change @ FDR 0.1	Final Parameter @ FDR 0.2	Expected Sample @ FDR 0.2	log2-fold change @ FDR 0.2	Final Parameter @ FDR 0.3	Expected Sample @ FDR 0.3	log2-fold change @ FDR 0.3	Final Parameter @ FDR 0.4	Expected Sample @ FDR 0.4	log2-fold change @ FDR 0.4
Patient[T.Pat_272]:Time[T.Late]	Pat_272:Late	Pat_272:Late_C8	C8	Cluster_8	4.903	7.675	0.726	1	6.26358	382.006	6.65935	6.26358	382.006	6.65935	6.26358	382.006	6.65935	6.26358	382.006	6.65935	6.26358	385.448	6.67229
Patient[T.Pat_1875]	Pat_1875	Pat_1875_C2	C2	Cluster_2	2.539	4.201	0.453	1	3.39622	237.956	4.37073	3.39622	237.956	4.37073	3.39622	240.238	4.3845	3.39622	240.238	4.3845	3.39622	226.811	4.30153
Patient[T.Pat_726]	Pat_726	Pat_726_C3	C3	Cluster_3	1.638	3.292	0.448	1	2.44333	179.502	3.03206	2.44333	179.502	3.03206	2.44333	171.853	2.96923	2.44333	173.448	2.98256	2.44333	171.047	2.96245
Patient[T.Pat_453]	Pat_453	Pat_453_C2	C2	Cluster_2	1.176	3.215	0.548	0.999467	2.13355	64.265	2.48214	2.13355	75.9059	2.72232	2.13355	75.9059	2.72232	2.13355	75.9059	2.72232	2.13355	74.5586	2.69648
Patient[T.Pat_1401]	Pat_1401	Pat_1401_C10	C10	Cluster_10	0.446	3.168	0.723	0.999467	1.77921	23.9798	2.26458	1.77921	23.9798	2.26458	1.77921	23.9798	2.26458	1.77921	21.5389	2.1097	1.77921	16.8487	1.75539
Patient[T.Pat_1585]	Pat_1585	Pat_1585_C7	C7	Cluster_7	0.35	2.557	0.595	0.998333	1.48538	33.6353	1.7919	1.48538	33.6353	1.7919	1.48538	33.6353	1.7919	1.48538	34.2489	1.81798	1.48538	34.0525	1.80969
Patient[T.Pat_1401]	Pat_1401	Pat_1401_C6	C6	Cluster_6	0.43	2.507	0.556	0.9982	1.41211	81.7869	1.73497	1.41211	81.7869	1.73497	1.41211	81.7869	1.73497	1.41211	73.4618	1.5801	1.41211	57.4651	1.22579
Patient[T.Pat_1335]	Pat_1335	Pat_1335_C5	C5	Cluster_5	-1.875	0	0.535	0.9834	-1.04066	20.1826	-1.38312	-1.04066	20.1826	-1.38312	-1.04066	18.5465	-1.50508	-1.04066	18.5465	-1.50508	-1.04066	18.6716	-1.49538
Patient[T.Pat_453]	Pat_453	Pat_453_C4	C4	Cluster_4	0.331	2.695	0.634	0.963933	1.49931	65.5476	1.56713	1.49931	77.4207	1.80731	1.49931	77.4207	1.80731	1.49931	77.4207	1.80731	1.49931	76.0465	1.78147
Patient[T.Pat_1875]	Pat_1875	Pat_1875_C0	C0	Cluster_0	-1.621	0.004	0.47	0.956133	-0.811396	56.6829	-1.69957	-0.811396	56.6829	-1.69957	-0.811396	57.2265	-1.6858	-0.811396	57.2265	-1.6858	-0.811396	54.0281	-1.76877
Patient[T.Pat_208]	Pat_208	Pat_208_C6	C6	Cluster_6	-3.748	-0.176	1.032	0.953733	-2.02962	3.75049	-2.71175	-2.02962	3.75049	-2.71175	-2.02962	3.78419	-2.69884	-2.02962	3.63493	-2.7569	-2.02962	3.60066	-2.77056
Patient[T.Pat_309]	Pat_309	Pat_309_C4	C4	Cluster_4	1.074	3.235	0.769	0.938667	2.14732	125.084	2.49941	2.14732	120.731	2.44832	2.14732	120.731	2.44832	2.14732	120.309	2.44326	2.14732	122.054	2.46404
Patient[T.Pat_453]	Pat_453	Pat_453_C6	C6	Cluster_6	0.408	2.045	0.527	0.9324	1.22081	55.1071	1.16534	1.22081	65.0891	1.40552	1.22081	65.0891	1.40552	1.22081	65.0891	1.40552	1.22081	63.9338	1.37968
Patient[T.Pat_1875]	Pat_1875	Pat_1875_C5	C5	Cluster_5	-2.536	0.005	0.713	0.9324	-1.27128	10.2328	-2.36303	-1.27128	10.2328	-2.36303	-1.27128	10.3309	-2.34927	-1.27128	10.3309	-2.34927	-1.27128	9.75349	-2.43224
Patient[T.Pat_198]	Pat_198	Pat_198_C6	C6	Cluster_6	-0.22	1.845	0.626	0.9316	0.756937	49.2141	1.00218	0.756937	49.2141	1.00218	0.756937	46.6852	0.92607	0.756937	47.5442	0.952374	0.756937	46.9961	0.935646
Patient[T.Pat_272]:Time[T.Late]	Pat_272:Late	Pat_272:Late_C0	C0	Cluster_0	-4.72	0.242	1.427	0.9276	-2.29385	3.57514	-5.68641	-2.29385	3.57514	-5.68641	-2.29385	3.57514	-5.68641	-2.29385	3.57514	-5.68641	-2.29385	3.60735	-5.67347
Patient[T.Pat_1585]	Pat_1585	Pat_1585_C1	C1	Cluster_1	0.092	1.332	0.38	0.901067	0.688661	135.485	0.642484	0.688661	135.485	0.642484	0.688661	135.485	0.642484	0.688661	137.956	0.668565	0.688661	137.166	0.660269
Patient[T.Pat_208]	Pat_208	Pat_208_C5	C5	Cluster_5	-2.406	-0.292	0.687	0.897333	-1.34465	15.9402	-1.72355	-1.34465	15.9402	-1.72355	-1.34465	16.0835	-1.71065	-1.34465	15.4491	-1.76871	-1.34465	15.3034	-1.78237
Patient[T.Pat_309]	Pat_309	Pat_309_C7	C7	Cluster_7	0.762	2.93	0.809	0.890733	1.89959	42.8735	2.14201	1.89959	41.3817	2.09092	1.89959	41.3817	2.09092	1.89959	41.237	2.08586	1.89959	41.8351	2.10664
Patient[T.Pat_726]	Pat_726	Pat_726_C1	C1	Cluster_1	-1.922	-0.292	0.517	0.8718	-0.986411	22.9988	-1.91602	-0.986411	22.9988	-1.91602	-0.986411	22.0187	-1.97885	-0.986411	22.2231	-1.96551	-0.986411	21.9155	-1.98563
Patient[T.Pat_453]	Pat_453	Pat_453_C3	C3	Cluster_3	-2.439	0.035	0.75	0.8502	0	14.5191	-0.595915	-1.30635	4.64407	-2.24041	-1.30635	4.64407	-2.24041	-1.30635	4.64407	-2.24041	-1.30635	4.56164	-2.26625
Patient[T.Pat_309]:Time[T.Late]	Pat_309:Late	Pat_309:Late_C8	C8	Cluster_8	-1.573	0.477	0.554	0.846133	0	3.77925	0	-0.361877	2.63874	-0.518248	-0.361877	2.63874	-0.518248	-0.361877	2.65002	-0.512093	-0.361877	2.79692	-0.434261
Patient[T.Pat_453]	Pat_453	Pat_453_C0	C0	Cluster_0	-1.22	0.009	0.401	0.804733	0	121.811	-0.595915	-0.612233	78.0003	-1.239	-0.612233	78.0003	-1.239	-0.612233	78.0003	-1.239	-0.612233	76.6159	-1.26484
Patient[T.Pat_309]	Pat_309	Pat_309_C3	C3	Cluster_3	-0.192	1.798	0.561	0.777867	0	14.493	-0.598512	0.730597	29.0451	0.404423	0.730597	29.0451	0.404423	0.730597	28.9435	0.399369	0.730597	29.3633	0.420144
Patient[T.Pat_267]:Time[T.Late]	Pat_267:Late	Pat_267:Late_C3	C3	Cluster_3	-0.152	2.303	0.788	0.769333	0	21.9447	0	1.04417	57.0216	1.37764	1.04417	57.3735	1.38651	1.04417	60.2214	1.45641	1.04417	57.1437	1.38072
Patient[T.Pat_1335]:Time[T.Late]	Pat_1335:Late	Pat_1335:Late_C10	C10	Cluster_10	-3.638	2.693	1.326	0.766733	0	4.99044	0	0.00879906	5.03403	0.0125473	0.00879906	4.46597	-0.160195	0.00879906	4.53243	-0.138883	0.00879906	4.61107	-0.114066
Patient[T.Pat_198]:Time[T.Late]	Pat_198:Late	Pat_198:Late_C6	C6	Cluster_6	-0.462	1.555	0.506	0.756667	0	24.57	0	0.37482	34.843	0.503973	0.37482	34.843	0.503973	0.37482	35.0422	0.512199	0.37482	30.2213	0.298672
Patient[T.Pat_267]	Pat_267	Pat_267_C5	C5	Cluster_5	-0.832	1.616	0.554	0.752267	0	52.6425	0	0.294718	67.8562	0.366251	0.294718	78.6917	0.579982	0.294718	73.1878	0.475375	0.294718	74.2461	0.496087
Patient[T.Pat_726]:Time[T.Late]	Pat_726:Late	Pat_726:Late_C8	C8	Cluster_8	-3.546	3.157	1.342	0.749067	0	3.77925	0	-0.0472744	3.6062	-0.0676206	-0.0472744	3.6062	-0.0676206	-0.0472744	3.05346	-0.307655	-0.0472744	2.02736	-0.898496
Patient[T.Pat_1335]	Pat_1335	Pat_1335_C6	C6	Cluster_6	-2.011	0.061	0.662	0.735	0	26.6684	0.118235	0	26.6684	0.118235	-0.964841	9.33806	-1.3957	-0.964841	9.33806	-1.3957	-0.964841	9.40106	-1.386
Patient[T.Pat_1585]:Time[T.Late]	Pat_1585:Late	Pat_1585:Late_C1	C1	Cluster_1	-1.754	2.23	0.803	0.726267	0	86.7929	0	0	86.7929	0	0.144765	96.1797	0.148156	0.144765	92.7897	0.096388	0.144765	92.2303	0.0876648
Patient[T.Pat_267]	Pat_267	Pat_267_C1	C1	Cluster_1	-0.691	1.744	0.544	0.720267	0	86.7929	0	0	83.3187	-0.0589371	0.303394	130.871	0.592498	0.303394	121.718	0.487891	0.303394	123.478	0.508603
Patient[T.Pat_267]	Pat_267	Pat_267_C8	C8	Cluster_8	-0.73	1.888	0.621	0.719933	0	3.77925	0	0	3.62797	-0.0589371	0.371479	6.10006	0.690725	0.371479	5.67341	0.586117	0.371479	5.75545	0.606829
Patient[T.Pat_1335]:Time[T.Late]	Pat_1335:Late	Pat_1335:Late_C7	C7	Cluster_7	-3.324	3.113	1.294	0.715667	0	9.71358	0	0	9.71259	-0.000147043	-0.0714239	8.0226	-0.275933	-0.0714239	8.14199	-0.254621	-0.0714239	8.28327	-0.229803
Patient[T.Pat_453]:Time[T.Late]	Pat_453:Late	Pat_453:Late_C2	C2	Cluster_2	-4.666	3.429	1.536	0.7092	0	11.502	0	0	11.502	0	0.305136	15.8141	0.459324	0.305136	15.6697	0.446088	0.305136	15.6651	0.445663
Patient[T.Pat_1401]:Time[T.Late]	Pat_1401:Late	Pat_1401:Late_C8	C8	Cluster_8	-1.692	4.369	1.572	0.704533	0	3.77925	0	0	3.77925	0	0.62796	7.11961	0.9137	0.62796	7.11178	0.912112	0.62796	6.58707	0.801538
Patient[T.Pat_1875]:Time[T.Late]	Pat_1875:Late	Pat_1875:Late_C5	C5	Cluster_5	-1.918	6.128	1.815	0.704067	0	52.6425	0	0	52.6425	0	0.713597	95.3774	0.857419	0.713597	97.28	0.885914	0.713597	119.048	1.17724
Patient[T.Pat_267]:Time[T.Late]	Pat_267:Late	Pat_267:Late_C2	C2	Cluster_2	-2.328	0.873	0.758	0.702267	0	11.502	0	0	10.5198	-0.128778	-0.596102	5.83173	-0.979895	-0.596102	6.12121	-0.910002	-0.596102	5.80837	-0.985685
Patient[T.Pat_198]	Pat_198	Pat_198_C0	C0	Cluster_0	-0.399	0.82	0.281	0.701	0	172.992	-0.0898535	0	172.992	-0.0898535	0.127069	186.337	0.0173617	0.127069	189.766	0.0436661	0.127069	187.578	0.026938
Patient[T.Pat_1335]	Pat_1335	Pat_1335_C10	C10	Cluster_10	-1.166	1.759	0.616	0.700933	0	5.41666	0.118235	0	5.41666	0.118235	0.237178	6.30989	0.338446	0.237178	6.30989	0.338446	0.237178	6.35245	0.348146
Patient[T.Pat_1335]:Time[T.Late]	Pat_1335:Late	Pat_1335:Late_C6	C6	Cluster_6	-1.613	4.87	1.33	0.6982	0	24.57	0	0	24.5675	-0.000147043	0.593919	39.4725	0.683954	0.593919	40.06	0.705266	0.593919	40.7551	0.730083
Patient[T.Pat_267]	Pat_267	Pat_267_C4	C4	Cluster_4	-2.537	0.49	0.893	0.696133	0	22.1209	0	0	21.2355	-0.0589371	-0.852287	10.5016	-1.0748	-0.852287	9.76714	-1.1794	-0.852287	9.90838	-1.15869
Patient[T.Pat_267]	Pat_267	Pat_267_C0	C0	Cluster_0	-1.684	0.611	0.578	0.692733	0	184.108	0	0	176.739	-0.0589371	-0.587949	113.849	-0.693437	-0.587949	105.886	-0.798044	-0.587949	107.417	-0.777332
Patient[T.Pat_1335]	Pat_1335	Pat_1335_C1	C1	Cluster_1	-0.096	1.19	0.391	0.691333	0	94.2055	0.118235	0	94.2055	0.118235	0.524579	146.279	0.753079	0.524579	146.279	0.753079	0.524579	147.266	0.762779
Patient[T.Pat_1401]:Time[T.Late]	Pat_1401:Late	Pat_1401:Late_C3	C3	Cluster_3	-4.188	3.345	1.489	0.689	0	21.9447	0	0	21.9447	0	-0.111879	19.7275	-0.153662	-0.111879	19.7058	-0.15525	-0.111879	18.2519	-0.265824
Patient[T.Pat_1335]	Pat_1335	Pat_1335_C3	C3	Cluster_3	-1.842	0.274	0.592	0.688133	0	23.8189	0.118235	0	23.8189	0.118235	-0.679843	11.0906	-0.984534	-0.679843	11.0906	-0.984534	-0.679843	11.1654	-0.974835
Patient[T.Pat_267]:Time[T.Late]	Pat_267:Late	Pat_267:Late_C8	C8	Cluster_8	-1.055	2.291	0.783	0.682733	0	3.77925	0	0	3.45652	-0.128778	0.469217	5.56019	0.557036	0.469217	5.83619	0.626929	0.469217	5.53792	0.551246
Patient[T.Pat_1335]:Time[T.Late]	Pat_1335:Late	Pat_1335:Late_C1	C1	Cluster_1	-1.404	2.767	0.924	0.6784	0	86.7929	0	0	86.784	-0.000147043	0.352345	109.512	0.335437	0.352345	111.142	0.356749	0.352345	113.07	0.381567
Patient[T.Pat_1401]:Time[T.Late]	Pat_1401:Late	Pat_1401:Late_C4	C4	Cluster_4	-3.239	2.723	1.104	0.672333	0	22.1209	0	0	22.1209	0	-0.16135	18.9261	-0.225034	-0.16135	18.9053	-0.226622	-0.16135	17.5105	-0.337196
Patient[T.Pat_1585]:Time[T.Late]	Pat_1585:Late	Pat_1585:Late_C10	C10	Cluster_10	-3.6	2.363	1.201	0.671867	0	4.99044	0	0	4.99044	0	-0.274487	3.6363	-0.456697	-0.274487	3.50813	-0.508464	-0.274487	3.48698	-0.517188
Patient[T.Pat_726]	Pat_726	Pat_726_C6	C6	Cluster_6	-0.072	1.439	0.488	0.6704	0	17.4589	-0.492929	0	17.4589	-0.492929	0.743441	35.1542	0.516803	0.743441	35.4806	0.530135	0.743441	34.9894	0.510023
Patient[T.Pat_1875]	Pat_1875	Pat_1875_C7	C7	Cluster_7	-2.414	0.374	0.779	0.665333	0	6.73198	-0.528971	0	6.73198	-0.528971	-0.942848	2.64737	-1.87544	-0.942848	2.64737	-1.87544	-0.942848	2.49941	-1.95842
Patient[T.Pat_1585]:Time[T.Late]	Pat_1585:Late	Pat_1585:Late_C8	C8	Cluster_8	-1.16	5.176	1.456	0.6634	0	3.77925	0	0	3.77925	0	0.978096	9.63642	1.3504	0.978096	9.29677	1.29863	0.978096	9.24073	1.28991
Patient[T.Pat_1335]:Time[T.Late]	Pat_1335:Late	Pat_1335:Late_C8	C8	Cluster_8	-3.202	2.259	1.143	0.658333	0	3.77925	0	0	3.77886	-0.000147043	-0.262956	2.57727	-0.552255	-0.262956	2.61562	-0.530943	-0.262956	2.66101	-0.506126
Patient[T.Pat_208]	Pat_208	Pat_208_C10	C10	Cluster_10	-2.728	0.358	0.904	0.6528	0	5.79793	0.216371	0	5.79793	0.216371	-1.09254	1.96189	-1.34692	-1.09254	1.88451	-1.40498	-1.09254	1.86674	-1.41865
Patient[T.Pat_453]:Time[T.Late]	Pat_453:Late	Pat_453:Late_C6	C6	Cluster_6	-7.194	2.291	1.918	0.6508	0	24.57	0	0	24.57	0	-0.508705	14.9702	-0.7148	-0.508705	14.8335	-0.728035	-0.508705	14.8291	-0.72846
Patient[T.Pat_726]:Time[T.Late]	Pat_726:Late	Pat_726:Late_C4	C4	Cluster_4	-1.329	5.654	1.552	0.6486	0	22.1209	0	0	22.1299	0.000581933	0	22.1299	0.000581933	0.963741	49.1212	1.15093	0.963741	32.6143	0.560091
Patient[T.Pat_272]	Pat_272	Pat_272_C10	C10	Cluster_10	-1.457	1.057	0.493	0.642933	0	4.99044	0	0	4.99044	0	0	4.99044	0	-0.0160664	4.96369	-0.00775547	-0.0160664	6.08753	0.286689
Patient[T.Pat_1585]:Time[T.Late]	Pat_1585:Late	Pat_1585:Late_C4	C4	Cluster_4	-2.088	2.124	0.904	0.6308	0	22.1209	0	0	22.1209	0	0	21.2096	-0.0606956	-0.0200217	20.0564	-0.141348	-0.0200217	19.9355	-0.150072
Patient[T.Pat_1585]:Time[T.Late]	Pat_1585:Late	Pat_1585:Late_C0	C0	Cluster_0	-1.824	2.725	0.847	0.629	0	184.108	0	0	184.108	0	0	176.523	-0.0606956	0.0734089	183.274	-0.00655651	0.0734089	182.169	-0.0152797
Patient[T.Pat_267]	Pat_267	Pat_267_C3	C3	Cluster_3	-0.284	2.087	0.689	0.6236	0	21.9447	0	0	21.0663	-0.0589371	0	24.4302	0.154794	0.935349	57.8967	1.39961	0.935349	58.7339	1.42032
Patient[T.Pat_1585]	Pat_1585	Pat_1585_C4	C4	Cluster_4	-1.421	0.315	0.468	0.6196	0	17.3432	-0.351043	0	17.3432	-0.351043	0	17.3432	-0.351043	-0.592348	9.76622	-1.17954	-0.592348	9.71023	-1.18784
Patient[T.Pat_1335]:Time[T.Late]	Pat_1335:Late	Pat_1335:Late_C5	C5	Cluster_5	-4.344	1.601	1.273	0.612667	0	52.6425	0	0	52.6372	-0.000147043	0	46.6973	-0.17289	-0.551771	27.2946	-0.947615	-0.551771	27.7682	-0.922798
Patient[T.Pat_726]	Pat_726	Pat_726_C2	C2	Cluster_2	-2.124	0.361	0.64	0.610933	0	8.17313	-0.492929	0	8.17313	-0.492929	0	7.82485	-0.555756	-0.710647	3.88024	-1.56767	-0.710647	3.82653	-1.58778
Patient[T.Pat_267]	Pat_267	Pat_267_C2	C2	Cluster_2	-1.792	0.528	0.576	0.609067	0	11.502	0	0	11.0416	-0.0589371	0	12.8048	0.154794	-0.53163	6.9984	-0.716794	-0.53163	7.09959	-0.696082
Patient[T.Pat_1401]	Pat_1401	Pat_1401_C4	C4	Cluster_4	-1.939	0.612	0.607	0.6052	0	17.9395	-0.302276	0	17.9395	-0.302276	0	17.9395	-0.302276	-0.601362	8.83119	-1.32473	-0.601362	6.90815	-1.67904
Patient[T.Pat_726]:Time[T.Late]	Pat_726:Late	Pat_726:Late_C10	C10	Cluster_10	-2.499	8.09	2.03	0.600533	0	4.99044	0	0	4.99246	0.000581933	0	4.99246	0.000581933	0.679568	8.34045	0.740957	0.679568	5.53769	0.150116
Patient[T.Pat_208]:Time[T.Late]	Pat_208:Late	Pat_208:Late_C1	C1	Cluster_1	-0.781	0.377	0.241	0.597733	0	86.7929	0	0	86.7929	0	0	86.7929	0	-0.120921	70.3196	-0.303651	-0.120921	70.4182	-0.301629
Patient[T.Pat_198]	Pat_198	Pat_198_C3	C3	Cluster_3	-2	0.276	0.584	0.597267	0	20.6196	-0.0898535	0	20.6196	-0.0898535	0	19.5601	-0.16596	-0.638202	10.5226	-1.06039	-0.638202	10.4012	-1.07711
Patient[T.Pat_726]:Time[T.Late]	Pat_726:Late	Pat_726:Late_C1	C1	Cluster_1	-3.547	7.178	1.91	0.595533	0	86.7929	0	0	86.8279	0.000581933	0	86.8279	0.000581933	0.335151	102.791	0.244068	0.335151	68.2488	-0.346773
Patient[T.Pat_267]:Time[T.Late]	Pat_267:Late	Pat_267:Late_C6	C6	Cluster_6	-1.075	1.774	0.583	0.595133	0	24.57	0	0	22.4718	-0.128778	0	22.6105	-0.119901	0.371366	34.4059	0.48576	0.371366	32.6475	0.410077
Patient[T.Pat_1875]:Time[T.Late]	Pat_1875:Late	Pat_1875:Late_C1	C1	Cluster_1	-5.084	2.491	1.31	0.593267	0	86.7929	0	0	86.7929	0	0	77.0338	-0.172085	-0.287499	58.9386	-0.558363	-0.287499	72.1271	-0.267035
Patient[T.Pat_1335]:Time[T.Late]	Pat_1335:Late	Pat_1335:Late_C3	C3	Cluster_3	-1.451	2.578	0.779	0.589733	0	21.9447	0	0	21.9424	-0.000147043	0	19.4663	-0.17289	0.382865	28.9718	0.40078	0.382865	29.4745	0.425598
Patient[T.Pat_1401]:Time[T.Late]	Pat_1401:Late	Pat_1401:Late_C10	C10	Cluster_10	-3.344	2.329	1.039	0.5886	0	4.99044	0	0	4.99044	0	0	5.0173	0.00774481	0.0907253	5.48775	0.137046	0.0907253	5.08286	0.0264717
Patient[T.Pat_208]:Time[T.Late]	Pat_208:Late	Pat_208:Late_C6	C6	Cluster_6	-1.514	0.875	0.441	0.582467	0	24.57	0	0	24.57	0	0	24.57	0	-0.130745	19.712	-0.317824	-0.130745	19.7396	-0.315802
Patient[T.Pat_198]	Pat_198	Pat_198_C2	C2	Cluster_2	-0.565	0.842	0.272	0.5776	0	10.8075	-0.0898535	0	10.8075	-0.0898535	0	10.2522	-0.16596	0.128826	11.8763	0.0462011	0.128826	11.7394	0.029473
Patient[T.Pat_453]:Time[T.Late]	Pat_453:Late	Pat_453:Late_C3	C3	Cluster_3	-4.5	2.272	1.123	0.571533	0	21.9447	0	0	21.9447	0	0	22.2372	0.0191058	-0.111884	19.7018	-0.155544	-0.111884	19.696	-0.155969
Patient[T.Pat_309]	Pat_309	Pat_309_C10	C10	Cluster_10	-0.95	1.916	0.586	0.5706	0	3.29586	-0.598512	0	3.18118	-0.649605	0	3.18118	-0.649605	0.390254	4.6833	-0.0916418	0.390254	4.75123	-0.0708665
Patient[T.Pat_267]:Time[T.Late]	Pat_267:Late	Pat_267:Late_C0	C0	Cluster_0	-2.015	0.335	0.647	0.570267	0	184.108	0	0	168.387	-0.128778	0	169.426	-0.119901	-0.771654	82.2043	-1.16327	-0.771654	78.0031	-1.23895
Patient[T.Pat_208]:Time[T.Late]	Pat_208:Late	Pat_208:Late_C8	C8	Cluster_8	-0.676	0.503	0.212	0.5698	0	3.77925	0	0	3.77925	0	0	3.77925	0	-0.0199521	3.38725	-0.157983	-0.0199521	3.392	-0.155961
Patient[T.Pat_208]	Pat_208	Pat_208_C7	C7	Cluster_7	-0.481	2.38	0.735	0.568933	0	11.2853	0.216371	0	11.2853	0.216371	0	11.3867	0.229276	0.940162	28.0046	1.52759	0.940162	27.7405	1.51392
Patient[T.Pat_453]:Time[T.Late]	Pat_453:Late	Pat_453:Late_C10	C10	Cluster_10	-4.574	6.688	1.95	0.565667	0	4.99044	0	0	4.99044	0	0	5.05697	0.0191058	0.81274	11.2947	1.17841	0.81274	11.2914	1.17798
Patient[T.Pat_1875]:Time[T.Late]	Pat_1875:Late	Pat_1875:Late_C2	C2	Cluster_2	-2.701	3.831	1.356	0.5646	0	11.502	0	0	11.502	0	0	10.2087	-0.172085	0.0731487	11.2026	-0.0380586	0.0731487	13.7093	0.25327
Patient[T.Pat_208]:Time[T.Late]	Pat_208:Late	Pat_208:Late_C7	C7	Cluster_7	-0.762	1.162	0.357	0.5646	0	9.71358	0	0	9.71358	0	0	9.71358	0	0.13595	10.1749	0.0669358	0.13595	10.1891	0.0689578
Patient[T.Pat_198]:Time[T.Late]	Pat_198:Late	Pat_198:Late_C5	C5	Cluster_5	-0.612	0.48	0.21	0.5634	0	52.6425	0	0	51.3175	-0.0367782	0	51.3175	-0.0367782	-0.0392267	49.6256	-0.0851445	-0.0392267	42.7984	-0.298672
Patient[T.Pat_267]:Time[T.Late]	Pat_267:Late	Pat_267:Late_C1	C1	Cluster_1	-0.407	1.667	0.517	0.562133	0	86.7929	0	0	79.3813	-0.128778	0	79.8712	-0.119901	0.563715	147.315	0.763261	0.563715	139.787	0.687578
Patient[T.Pat_198]:Time[T.Late]	Pat_198:Late	Pat_198:Late_C8	C8	Cluster_8	-1.016	0.718	0.358	0.5594	0	3.77925	0	0	3.68412	-0.0367782	0	3.68412	-0.0367782	-0.141508	3.21628	-0.232706	-0.141508	2.7738	-0.446233
Patient[T.Pat_1585]:Time[T.Late]	Pat_1585:Late	Pat_1585:Late_C3	C3	Cluster_3	-2.991	2.957	0.992	0.557133	0	21.9447	0	0	21.9447	0	0	21.0406	-0.0606956	0.124229	22.984	0.0667616	0.124229	22.8455	0.0580384
Patient[T.Pat_208]:Time[T.Late]	Pat_208:Late	Pat_208:Late_C0	C0	Cluster_0	-0.288	0.957	0.299	0.553333	0	184.108	0	0	184.108	0	0	184.108	0	0.267909	220.056	0.257313	0.267909	220.364	0.259335
Patient[T.Pat_208]:Time[T.Late]	Pat_208:Late	Pat_208:Late_C5	C5	Cluster_5	-1.154	0.72	0.356	0.551467	0	52.6425	0	0	52.6425	0	0	52.6425	0	-0.0886917	44.048	-0.257153	-0.0886917	44.1098	-0.255131
Patient[T.Pat_726]:Time[T.Late]	Pat_726:Late	Pat_726:Late_C2	C2	Cluster_2	-6.314	3.602	1.643	0.550467	0	11.502	0	0	11.5067	0.000581933	0	11.5067	0.000581933	-0.182125	8.12076	-0.502203	-0.182125	5.39182	-1.09304
Patient[T.Pat_1401]	Pat_1401	Pat_1401_C3	C3	Cluster_3	-1.993	0.253	0.623	0.548467	0	17.7965	-0.302276	0	17.7965	-0.302276	0	17.7965	-0.302276	-0.83577	6.93015	-1.66291	-0.83577	5.42107	-2.01722
Patient[T.Pat_726]:Time[T.Late]	Pat_726:Late	Pat_726:Late_C5	C5	Cluster_5	-2.658	4.679	1.366	0.5474	0	52.6425	0	0	52.6638	0.000581933	0	52.6638	0.000581933	0.0895471	48.769	-0.110264	0.0895471	32.3805	-0.701105
Patient[T.Pat_1875]:Time[T.Late]	Pat_1875:Late	Pat_1875:Late_C7	C7	Cluster_7	-2.645	5.407	1.67	0.547333	0	9.71358	0	0	9.71358	0	0	8.62137	-0.172085	0.77063	19.0035	0.968194	0.77063	23.2559	1.25952
Patient[T.Pat_272]	Pat_272	Pat_272_C7	C7	Cluster_7	-0.937	1.194	0.394	0.546733	0	9.71358	0	0	9.71358	0	0	9.71358	0	0.112158	10.9833	0.177233	0.112158	13.47	0.471678
Time[T.Late]	Time[T.Late]	Time[T.Late]_C10	C10	Cluster_10	-0.341	0.46	0.14	0.541867	0	4.99044	0	0	4.99044	0	0	4.99044	0	0.0389993	5.14402	0.0437297	0.0389993	5.18592	0.0554329
Time[T.Late]	Time[T.Late]	Time[T.Late]_C3	C3	Cluster_3	-0.324	0.983	0.282	0.5398	0	21.9447	0	0	21.9447	0	0	21.9447	0	0.151016	25.3012	0.205336	0.151016	25.5073	0.21704
Patient[T.Pat_272]	Pat_272	Pat_272_C6	C6	Cluster_6	-1.684	0.905	0.521	0.538867	0	24.57	0	0	24.57	0	0	24.57	0	-0.238945	19.5558	-0.329301	-0.238945	23.9835	-0.034856
Patient[T.Pat_309]:Time[T.Late]	Pat_309:Late	Pat_309:Late_C6	C6	Cluster_6	-1.127	0.826	0.346	0.537267	0	24.57	0	0	24.6353	0.00383097	0	24.6353	0.00383097	-0.0777127	22.8908	-0.10213	-0.0777127	24.1596	-0.024298
Patient[T.Pat_1401]	Pat_1401	Pat_1401_C5	C5	Cluster_5	-0.069	1.86	0.604	0.536867	0	42.6916	-0.302276	0	42.6916	-0.302276	0	42.6916	-0.302276	0.945721	98.7284	0.907236	0.945721	77.2297	0.552927
Patient[T.Pat_272]	Pat_272	Pat_272_C8	C8	Cluster_8	-1.31	0.96	0.432	0.5338	0	3.77925	0	0	3.77925	0	0	3.77925	0	-0.127549	3.36244	-0.168591	-0.127549	4.12374	0.125853
Patient[T.Pat_1335]:Time[T.Late]	Pat_1335:Late	Pat_1335:Late_C4	C4	Cluster_4	-1.091	2.295	0.658	0.5332	0	22.1209	0	0	22.1187	-0.000147043	0	19.6227	-0.17289	0.201361	24.357	0.138924	0.201361	24.7796	0.163742
Patient[T.Pat_272]	Pat_272	Pat_272_C3	C3	Cluster_3	-1.281	0.472	0.356	0.5308	0	21.9447	0	0	21.9447	0	0	21.9447	0	0	22.1805	0.0154235	-0.25882	20.9993	-0.0635308
Patient[T.Pat_1875]:Time[T.Late]	Pat_1875:Late	Pat_1875:Late_C10	C10	Cluster_10	-9.326	1.627	2.513	0.5282	0	4.99044	0	0	4.99044	0	0	4.42931	-0.172085	0	4.51767	-0.14359	-1.45329	1.29258	-1.94891
Patient[T.Pat_309]:Time[T.Late]	Pat_309:Late	Pat_309:Late_C0	C0	Cluster_0	-1.149	0.266	0.318	0.527867	0	184.108	0	0	184.598	0.00383097	0	184.598	0.00383097	0	185.387	0.00998542	-0.267286	149.771	-0.297795
Patient[T.Pat_1875]:Time[T.Late]	Pat_1875:Late	Pat_1875:Late_C6	C6	Cluster_6	-3.798	3.452	1.443	0.5272	0	24.57	0	0	24.57	0	0	21.8073	-0.172085	0	22.2423	-0.14359	0.136261	31.1929	0.344322
Patient[T.Pat_309]:Time[T.Late]	Pat_309:Late	Pat_309:Late_C3	C3	Cluster_3	-0.35	1.492	0.416	0.5254	0	21.9447	0	0	22.003	0.00383097	0	22.003	0.00383097	0	22.0971	0.00998542	0.355519	33.2786	0.600723
Patient[T.Pat_272]	Pat_272	Pat_272_C2	C2	Cluster_2	-0.706	0.859	0.309	0.524067	0	11.502	0	0	11.502	0	0	11.502	0	0	11.6257	0.0154235	0.0196787	14.5412	0.338259
Patient[T.Pat_453]:Time[T.Late]	Pat_453:Late	Pat_453:Late_C7	C7	Cluster_7	-4.944	1.869	1.329	0.523067	0	9.71358	0	0	9.71358	0	0	9.84307	0.0191058	0	9.75318	0.00587038	-0.770627	4.51169	-1.10633
Patient[T.Pat_267]:Time[T.Late]	Pat_267:Late	Pat_267:Late_C7	C7	Cluster_7	-0.905	1.064	0.345	0.5178	0	9.71358	0	0	8.88409	-0.128778	0	8.93893	-0.119901	0	9.38264	-0.0500086	-0.0197292	8.72919	-0.154154
Patient[T.Pat_1401]:Time[T.Late]	Pat_1401:Late	Pat_1401:Late_C7	C7	Cluster_7	-2.917	1.524	0.899	0.517733	0	9.71358	0	0	9.71358	0	0	9.76586	0.00774481	0	9.75512	0.00615703	-0.410352	5.99422	-0.69643
Patient[T.Pat_309]:Time[T.Late]	Pat_309:Late	Pat_309:Late_C1	C1	Cluster_1	-0.555	0.724	0.251	0.515933	0	86.7929	0	0	87.0237	0.00383097	0	87.0237	0.00383097	0	87.3957	0.00998542	0.0913984	101.068	0.219678
Patient[T.Pat_272]	Pat_272	Pat_272_C5	C5	Cluster_5	-1.207	1.025	0.39	0.514667	0	52.6425	0	0	52.6425	0	0	52.6425	0	0	53.2083	0.0154235	-0.0166784	64.1761	0.285806
Patient[T.Pat_1875]:Time[T.Late]	Pat_1875:Late	Pat_1875:Late_C3	C3	Cluster_3	-6.482	1.471	1.525	0.5138	0	21.9447	0	0	21.9447	0	0	19.4772	-0.172085	0	19.8657	-0.14359	-0.791804	11.0135	-0.994592
Patient[T.Pat_1335]	Pat_1335	Pat_1335_C8	C8	Cluster_8	-0.538	1.397	0.422	0.513067	0	4.10202	0.118235	0	4.10202	0.118235	0	3.76949	-0.00372878	0	3.76949	-0.00372878	0.346218	5.36492	0.505458
Patient[T.Pat_1585]	Pat_1585	Pat_1585_C8	C8	Cluster_8	-2.044	0.638	0.632	0.5126	0	2.96299	-0.351043	0	2.96299	-0.351043	0	2.96299	-0.351043	0	3.01704	-0.324963	-0.619586	1.61436	-1.22713
Patient[T.Pat_1875]:Time[T.Late]	Pat_1875:Late	Pat_1875:Late_C0	C0	Cluster_0	-3.909	1.163	1.026	0.511867	0	184.108	0	0	184.108	0	0	163.407	-0.172085	0	166.667	-0.14359	-0.538972	118.98	-0.629834
Patient[T.Pat_1401]:Time[T.Late]	Pat_1401:Late	Pat_1401:Late_C5	C5	Cluster_5	-4.744	3.326	1.306	0.510133	0	52.6425	0	0	52.6425	0	0	52.9259	0.00774481	0	52.8677	0.00615703	0.102487	54.2517	0.0434397
Time[T.Late]	Time[T.Late]	Time[T.Late]_C7	C7	Cluster_7	-0.419	0.491	0.165	0.509333	0	9.71358	0	0	9.71358	0	0	9.71358	0	0	9.62955	-0.0125343	0.021147	9.91546	0.0296776
Patient[T.Pat_198]	Pat_198	Pat_198_C10	C10	Cluster_10	-1.17	0.781	0.367	0.502667	0	4.68911	-0.0898535	0	4.68911	-0.0898535	0	4.44816	-0.16596	0	4.53	-0.139656	-0.177042	3.75124	-0.411802
Patient[T.Pat_1585]	Pat_1585	Pat_1585_C2	C2	Cluster_2	-0.747	0.993	0.326	0.500933	0	9.0178	-0.351043	0	9.0178	-0.351043	0	9.0178	-0.351043	0	9.1823	-0.324963	0.0622976	9.7165	-0.243382
Patient[T.Pat_272]:Time[T.Late]	Pat_272:Late	Pat_272:Late_C3	C3	Cluster_3	-3.123	1.687	0.947	0.500933	0	4.2243	-2.37709	0	4.2243	-2.37709	0	4.2243	-2.37709	0	4.2243	-2.37709	-0.593059	2.35553	-3.21975
Patient[T.Pat_1335]	Pat_1335	Pat_1335_C4	C4	Cluster_4	-1.241	0.442	0.369	0.4992	0	24.0102	0.118235	0	24.0102	0.118235	0	22.0638	-0.00372878	0	22.0638	-0.00372878	-0.315424	16.2037	-0.44909
Patient[T.Pat_198]:Time[T.Late]	Pat_198:Late	Pat_198:Late_C3	C3	Cluster_3	-1.318	0.285	0.357	0.493133	0	21.9447	0	0	21.3923	-0.0367782	0	21.3923	-0.0367782	0	21.5146	-0.0285523	-0.333001	13.2995	-0.722499
Time[T.Late]	Time[T.Late]	Time[T.Late]_C4	C4	Cluster_4	-0.57	0.483	0.18	0.4904	0	22.1209	0	0	22.1209	0	0	22.1209	0	0	21.9296	-0.0125343	-0.0436158	21.1647	-0.0637553
Patient[T.Pat_1335]	Pat_1335	Pat_1335_C7	C7	Cluster_7	-0.837	1.321	0.393	0.4896	0	10.5432	0.118235	0	10.5432	0.118235	0	9.6885	-0.00372878	0	9.6885	-0.00372878	0.216174	12.1076	0.317844
Time[T.Late]	Time[T.Late]	Time[T.Late]_C5	C5	Cluster_5	-0.468	0.562	0.163	0.4894	0	52.6425	0	0	52.6425	0	0	52.6425	0	0	52.1872	-0.0125343	-0.0080023	52.1929	-0.012376
Patient[T.Pat_1585]	Pat_1585	Pat_1585_C3	C3	Cluster_3	-0.578	1.342	0.389	0.488733	0	17.205	-0.351043	0	17.205	-0.351043	0	17.205	-0.351043	0	17.5188	-0.324963	0.286819	23.2045	0.0805335
Patient[T.Pat_1585]	Pat_1585	Pat_1585_C10	C10	Cluster_10	-1.065	0.912	0.35	0.4874	0	3.91259	-0.351043	0	3.91259	-0.351043	0	3.91259	-0.351043	0	3.98396	-0.324963	-0.0568879	3.74207	-0.41533
Patient[T.Pat_726]:Time[T.Late]	Pat_726:Late	Pat_726:Late_C3	C3	Cluster_3	-1.566	4.199	1.253	0.4872	0	21.9447	0	0	21.9535	0.000581933	0	21.9535	0.000581933	0	18.5886	-0.239453	0.639862	23.4032	0.0928321
Patient[T.Pat_309]	Pat_309	Pat_309_C8	C8	Cluster_8	-1.452	1.277	0.484	0.4846	0	2.49595	-0.598512	0	2.4091	-0.649605	0	2.4091	-0.649605	0	2.40067	-0.654659	-0.208357	1.97742	-0.93448
Time[T.Late]	Time[T.Late]	Time[T.Late]_C8	C8	Cluster_8	-0.787	0.544	0.223	0.483333	0	3.77925	0	0	3.77925	0	0	3.77925	0	0	3.74655	-0.0125343	-0.0332065	3.65371	-0.048738
Patient[T.Pat_1585]	Pat_1585	Pat_1585_C5	C5	Cluster_5	-0.811	0.645	0.261	0.482867	0	41.2726	-0.351043	0	41.2726	-0.351043	0	41.2726	-0.351043	0	42.0255	-0.324963	-0.0563037	39.497	-0.414487
Patient[T.Pat_453]:Time[T.Late]	Pat_453:Late	Pat_453:Late_C8	C8	Cluster_8	-4.286	2.853	1.177	0.481067	0	3.77925	0	0	3.77925	0	0	3.82963	0.0191058	0	3.79466	0.00587038	-0.402075	2.53761	-0.574626
Time[T.Late]	Time[T.Late]	Time[T.Late]_C1	C1	Cluster_1	-0.373	0.407	0.128	0.480867	0	86.7929	0	0	86.7929	0	0	86.7929	0	0	86.0421	-0.0125343	-0.0315686	84.0473	-0.0463749
Patient[T.Pat_1335]	Pat_1335	Pat_1335_C2	C2	Cluster_2	-0.949	0.685	0.291	0.480133	0	12.4844	0.118235	0	12.4844	0.118235	0	11.4724	-0.00372878	0	11.4724	-0.00372878	-0.074936	10.7159	-0.102139
Patient[T.Pat_1335]:Time[T.Late]	Pat_1335:Late	Pat_1335:Late_C0	C0	Cluster_0	-1.853	1.699	0.642	0.4798	0	184.108	0	0	184.09	-0.000147043	0	163.316	-0.17289	0	165.746	-0.151578	-0.0319392	163.322	-0.172839
Patient[T.Pat_1401]	Pat_1401	Pat_1401_C0	C0	Cluster_0	-0.051	1.3	0.417	0.4792	0	149.307	-0.302276	0	149.307	-0.302276	0	149.307	-0.302276	0	134.109	-0.457151	0.65362	201.68	0.131514
Patient[T.Pat_272]:Time[T.Late]	Pat_272:Late	Pat_272:Late_C4	C4	Cluster_4	-2.8	1.481	0.873	0.479	0	4.25823	-2.37709	0	4.25823	-2.37709	0	4.25823	-2.37709	0	4.25823	-2.37709	-0.62301	2.30438	-3.26296
Patient[T.Pat_272]	Pat_272	Pat_272_C0	C0	Cluster_0	-2.611	0.962	0.729	0.477733	0	184.108	0	0	184.108	0	0	184.108	0	0	186.087	0.0154235	-0.501906	138.159	-0.414229
Patient[T.Pat_309]:Time[T.Late]	Pat_309:Late	Pat_309:Late_C7	C7	Cluster_7	-0.771	1.805	0.488	0.475867	0	9.71358	0	0	9.7394	0.00383097	0	9.7394	0.00383097	0	9.78104	0.00998542	0.309615	14.0695	0.534497
Patient[T.Pat_267]:Time[T.Late]	Pat_267:Late	Pat_267:Late_C4	C4	Cluster_4	-1.908	1.104	0.63	0.475533	0	22.1209	0	0	20.2319	-0.128778	0	20.3568	-0.119901	0	21.3673	-0.0500086	-0.433247	13.1465	-0.750734
Patient[T.Pat_1875]	Pat_1875	Pat_1875_C4	C4	Cluster_4	-0.196	1.67	0.523	0.475467	0	15.3309	-0.528971	0	15.3309	-0.528971	0	15.4779	-0.515203	0	15.4779	-0.515203	0.746324	30.8219	0.478542
Patient[T.Pat_726]	Pat_726	Pat_726_C10	C10	Cluster_10	-2.455	0.452	0.672	0.474467	0	3.54611	-0.492929	0	3.54611	-0.492929	0	3.395	-0.555756	0	3.42652	-0.542424	-0.761162	1.57845	-1.66066
Time[T.Late]	Time[T.Late]	Time[T.Late]_C6	C6	Cluster_6	-0.356	0.443	0.138	0.474133	0	24.57	0	0	24.57	0	0	24.57	0	0	24.3574	-0.0125343	0.0181563	25.0057	0.025363
Patient[T.Pat_1401]	Pat_1401	Pat_1401_C7	C7	Cluster_7	-0.916	1.269	0.42	0.473333	0	7.87744	-0.302276	0	7.87744	-0.302276	0	7.87744	-0.302276	0	7.0756	-0.457151	0.087773	6.04261	-0.684831
Patient[T.Pat_726]:Time[T.Late]	Pat_726:Late	Pat_726:Late_C0	C0	Cluster_0	-2.075	5.478	1.429	0.4724	0	184.108	0	0	184.183	0.000581933	0	184.183	0.000581933	0	155.952	-0.239453	0.787467	227.574	0.305781
Patient[T.Pat_267]	Pat_267	Pat_267_C6	C6	Cluster_6	-1.173	0.679	0.382	0.471667	0	24.57	0	0	23.5865	-0.0589371	0	27.3528	0.154794	0	25.4397	0.0501867	-0.276942	19.5647	-0.328643
Patient[T.Pat_198]:Time[T.Late]	Pat_198:Late	Pat_198:Late_C2	C2	Cluster_2	-0.539	0.869	0.258	0.470533	0	11.502	0	0	11.2125	-0.0367782	0	11.2125	-0.0367782	0	11.2766	-0.0285523	0.114123	10.901	-0.0774354
Patient[T.Pat_198]:Time[T.Late]	Pat_198:Late	Pat_198:Late_C0	C0	Cluster_0	-0.252	1.215	0.313	0.467867	0	184.108	0	0	179.474	-0.0367782	0	179.474	-0.0367782	0	180.501	-0.0285523	0.304331	211.042	0.196977
Patient[T.Pat_267]	Pat_267	Pat_267_C7	C7	Cluster_7	-1.046	1.138	0.381	0.4666	0	9.71358	0	0	9.32475	-0.0589371	0	10.8138	0.154794	0	10.0574	0.0501867	0.0694319	10.9364	0.171068
Patient[T.Pat_453]	Pat_453	Pat_453_C10	C10	Cluster_10	-2.22	1.1	0.68	0.464867	0	3.3018	-0.595915	0	3.89988	-0.355738	0	3.89988	-0.355738	0	3.89988	-0.355738	-0.577409	2.15034	-1.2146
Patient[T.Pat_309]	Pat_309	Pat_309_C5	C5	Cluster_5	-1.377	0.986	0.432	0.464133	0	34.767	-0.598512	0	33.5572	-0.649605	0	33.5572	-0.649605	0	33.4399	-0.654659	-0.18814	28.1068	-0.905312
Patient[T.Pat_198]	Pat_198	Pat_198_C8	C8	Cluster_8	-1.25	0.711	0.378	0.4546	0	3.55105	-0.0898535	0	3.55105	-0.0898535	0	3.36857	-0.16596	0	3.43056	-0.139656	-0.232341	2.68797	-0.491582
Patient[T.Pat_267]:Time[T.Late]	Pat_267:Late	Pat_267:Late_C5	C5	Cluster_5	-0.724	2.417	0.606	0.454267	0	52.6425	0	0	48.1472	-0.128778	0	48.4443	-0.119901	0	50.849	-0.0500086	0.462812	76.6473	0.542005
Patient[T.Pat_267]	Pat_267	Pat_267_C10	C10	Cluster_10	-1.425	1.314	0.458	0.453867	0	4.99044	0	0	4.79068	-0.0589371	0	5.55567	0.154794	0	5.1671	0.0501867	-0.153894	4.49414	-0.151123
Patient[T.Pat_1335]:Time[T.Late]	Pat_1335:Late	Pat_1335:Late_C2	C2	Cluster_2	-3.619	2.304	0.967	0.453467	0	11.502	0	0	11.5009	-0.000147043	0	10.203	-0.17289	0	10.3549	-0.151578	-0.235134	8.3272	-0.465987
Patient[T.Pat_1585]:Time[T.Late]	Pat_1585:Late	Pat_1585:Late_C7	C7	Cluster_7	-1.345	2.712	0.736	0.453267	0	9.71358	0	0	9.71358	0	0	9.31339	-0.0606956	0	8.98513	-0.112463	0.256244	11.5394	0.248495
Patient[T.Pat_453]:Time[T.Late]	Pat_453:Late	Pat_453:Late_C4	C4	Cluster_4	-5.409	2.663	1.308	0.453067	0	22.1209	0	0	22.1209	0	0	22.4158	0.0191058	0	22.2111	0.00587038	-0.00047368	22.1941	0.00476211
Patient[T.Pat_453]:Time[T.Late]	Pat_453:Late	Pat_453:Late_C1	C1	Cluster_1	-4.588	2.702	1.331	0.451	0	86.7929	0	0	86.7929	0	0	87.9499	0.0191058	0	87.1468	0.00587038	-0.513088	52.1545	-0.734784
Patient[T.Pat_198]:Time[T.Late]	Pat_198:Late	Pat_198:Late_C1	C1	Cluster_1	-0.303	0.63	0.178	0.448533	0	86.7929	0	0	84.6083	-0.0367782	0	84.6083	-0.0367782	0	85.0921	-0.0285523	0.124181	83.0887	-0.0629244
Patient[T.Pat_453]	Pat_453	Pat_453_C1	C1	Cluster_1	-0.918	1.068	0.352	0.444867	0	57.4243	-0.595915	0	67.826	-0.355738	0	67.826	-0.355738	0	67.826	-0.355738	0.13147	75.9828	-0.191904
Patient[T.Pat_208]:Time[T.Late]	Pat_208:Late	Pat_208:Late_C10	C10	Cluster_10	-1.066	0.612	0.292	0.4446	0	4.99044	0	0	4.99044	0	0	4.99044	0	0	4.56296	-0.129198	-0.142511	3.96245	-0.332776
Patient[T.Pat_1401]	Pat_1401	Pat_1401_C2	C2	Cluster_2	-2.328	0.433	0.648	0.444533	0	9.32783	-0.302276	0	9.32783	-0.302276	0	9.32783	-0.302276	0	8.37836	-0.457151	-0.628254	3.49666	-1.71784
Patient[T.Pat_272]	Pat_272	Pat_272_C4	C4	Cluster_4	-1.009	1.104	0.344	0.443733	0	22.1209	0	0	22.1209	0	0	22.1209	0	0	22.3587	0.0154235	-0.0337667	26.5105	0.261153
Patient[T.Pat_726]:Time[T.Late]	Pat_726:Late	Pat_726:Late_C6	C6	Cluster_6	-1.599	6.059	1.357	0.436867	0	24.57	0	0	24.5799	0.000581933	0	24.5799	0.000581933	0	20.8124	-0.239453	0.611497	25.4701	0.0519098
Patient[T.Pat_198]	Pat_198	Pat_198_C5	C5	Cluster_5	-0.404	0.73	0.21	0.4322	0	49.4639	-0.0898535	0	49.4639	-0.0898535	0	46.9221	-0.16596	0	47.7855	-0.139656	0.150932	54.93	0.0613645
Patient[T.Pat_1401]:Time[T.Late]	Pat_1401:Late	Pat_1401:Late_C6	C6	Cluster_6	-1.997	3.934	0.962	0.431333	0	24.57	0	0	24.57	0	0	24.7022	0.00774481	0	24.675	0.00615703	0.231384	28.8045	0.229399
Patient[T.Pat_1875]	Pat_1875	Pat_1875_C3	C3	Cluster_3	-0.416	1.448	0.413	0.4288	0	15.2087	-0.528971	0	15.2087	-0.528971	0	15.3546	-0.515203	0	15.3546	-0.515203	0.448813	22.7079	0.0493242
Patient[T.Pat_1875]	Pat_1875	Pat_1875_C10	C10	Cluster_10	-1.248	1.232	0.505	0.428733	0	3.45862	-0.528971	0	3.45862	-0.528971	0	3.49178	-0.515203	0	3.49178	-0.515203	-0.0744658	3.06006	-0.705607
Patient[T.Pat_198]:Time[T.Late]	Pat_198:Late	Pat_198:Late_C7	C7	Cluster_7	-1.285	0.503	0.377	0.4286	0	9.71358	0	0	9.46908	-0.0367782	0	9.46908	-0.0367782	0	9.52323	-0.0285523	-0.298181	6.09548	-0.672264
Patient[T.Pat_309]:Time[T.Late]	Pat_309:Late	Pat_309:Late_C10	C10	Cluster_10	-1.1	1.23	0.546	0.428	0	4.99044	0	0	5.00371	0.00383097	0	5.00371	0.00383097	0	5.0251	0.00998542	-0.125224	4.6794	-0.092843
Patient[T.Pat_726]:Time[T.Late]	Pat_726:Late	Pat_726:Late_C7	C7	Cluster_7	-5.587	6.218	1.935	0.427333	0	9.71358	0	0	9.7175	0.000581933	0	9.7175	0.000581933	0	8.22805	-0.239453	-0.279585	4.13061	-1.23365
Patient[T.Pat_267]:Time[T.Late]	Pat_267:Late	Pat_267:Late_C10	C10	Cluster_10	-1.166	1.593	0.475	0.426	0	4.99044	0	0	4.56429	-0.128778	0	4.59246	-0.119901	0	4.82042	-0.0500086	0.201327	5.59419	0.164762
Patient[T.Pat_1875]:Time[T.Late]	Pat_1875:Late	Pat_1875:Late_C8	C8	Cluster_8	-2.64	3.467	0.939	0.4198	0	3.77925	0	0	3.77925	0	0	3.3543	-0.172085	0	3.42121	-0.14359	0.343335	5.90184	0.643066
Patient[T.Pat_1401]:Time[T.Late]	Pat_1401:Late	Pat_1401:Late_C2	C2	Cluster_2	-1.48	6.108	1.588	0.419133	0	11.502	0	0	11.502	0	0	11.564	0.00774481	0	11.5512	0.00615703	1.16881	34.431	1.58182
Patient[T.Pat_453]:Time[T.Late]	Pat_453:Late	Pat_453:Late_C0	C0	Cluster_0	-0.859	3.671	0.76	0.418933	0	184.108	0	0	184.108	0	0	186.563	0.0191058	0	184.859	0.00587038	0.20302	226.404	0.298342
Patient[T.Pat_198]:Time[T.Late]	Pat_198:Late	Pat_198:Late_C10	C10	Cluster_10	-0.635	1.088	0.307	0.418267	0	4.99044	0	0	4.86483	-0.0367782	0	4.86483	-0.0367782	0	4.89265	-0.0285523	0.143167	4.86903	-0.0355335
Patient[T.Pat_726]	Pat_726	Pat_726_C5	C5	Cluster_5	-0.644	0.997	0.305	0.414933	0	37.4068	-0.492929	0	37.4068	-0.492929	0	35.8127	-0.555756	0	36.1452	-0.542424	0.197682	43.4359	-0.277342
Patient[T.Pat_198]	Pat_198	Pat_198_C7	C7	Cluster_7	-1.288	0.623	0.348	0.410933	0	9.12705	-0.0898535	0	9.12705	-0.0898535	0	8.65805	-0.16596	0	8.81736	-0.139656	-0.223683	6.96881	-0.479091
Patient[T.Pat_208]	Pat_208	Pat_208_C4	C4	Cluster_4	-0.883	1.164	0.334	0.409667	0	25.7003	0.216371	0	25.7003	0.216371	0	25.9312	0.229276	0	24.9084	0.17122	0.153032	28.7536	0.378331
Patient[T.Pat_198]	Pat_198	Pat_198_C4	C4	Cluster_4	-0.782	0.763	0.258	0.4094	0	20.7852	-0.0898535	0	20.7852	-0.0898535	0	19.7172	-0.16596	0	20.08	-0.139656	0.0233762	20.3179	-0.122659
Patient[T.Pat_1585]	Pat_1585	Pat_1585_C6	C6	Cluster_6	-0.676	1.109	0.305	0.407867	0	19.2633	-0.351043	0	19.2633	-0.351043	0	19.2633	-0.351043	0	19.6147	-0.324963	0	19.5022	-0.333258
Patient[T.Pat_453]	Pat_453	Pat_453_C7	C7	Cluster_7	-1.776	0.463	0.495	0.405	0	6.42674	-0.595915	0	7.59087	-0.355738	0	7.59087	-0.355738	0	7.59087	-0.355738	0	7.45613	-0.381575
Patient[T.Pat_309]	Pat_309	Pat_309_C6	C6	Cluster_6	-0.974	1.354	0.384	0.405	0	16.2269	-0.598512	0	15.6622	-0.649605	0	15.6622	-0.649605	0	15.6075	-0.654659	0	15.8338	-0.633884
Patient[T.Pat_1401]:Time[T.Late]	Pat_1401:Late	Pat_1401:Late_C1	C1	Cluster_1	-1.246	4.592	1.005	0.404867	0	86.7929	0	0	86.7929	0	0	87.2601	0.00774481	0	87.1641	0.00615703	0	80.7331	-0.104417
Patient[T.Pat_309]:Time[T.Late]	Pat_309:Late	Pat_309:Late_C2	C2	Cluster_2	-1.719	0.931	0.46	0.4036	0	11.502	0	0	11.5326	0.00383097	0	11.5326	0.00383097	0	11.5819	0.00998542	0	12.2239	0.0878177
Patient[T.Pat_272]	Pat_272	Pat_272_C1	C1	Cluster_1	-0.916	0.425	0.239	0.4024	0	86.7929	0	0	86.7929	0	0	86.7929	0	0	87.7257	0.0154235	0	107.588	0.309868
Patient[T.Pat_208]:Time[T.Late]	Pat_208:Late	Pat_208:Late_C4	C4	Cluster_4	-0.568	0.705	0.207	0.393667	0	22.1209	0	0	22.1209	0	0	22.1209	0	0	20.226	-0.129198	0	20.2544	-0.127176
Patient[T.Pat_272]:Time[T.Late]	Pat_272:Late	Pat_272:Late_C6	C6	Cluster_6	-2.772	1.506	0.78	0.3904	0	4.72966	-2.37709	0	4.72966	-2.37709	0	4.72966	-2.37709	0	4.72966	-2.37709	0	4.77227	-2.36415
Patient[T.Pat_272]:Time[T.Late]	Pat_272:Late	Pat_272:Late_C10	C10	Cluster_10	-1.395	3.514	0.882	0.390133	0	0.960648	-2.37709	0	0.960648	-2.37709	0	0.960648	-2.37709	0	0.960648	-2.37709	0	0.969304	-2.36415
Patient[T.Pat_208]	Pat_208	Pat_208_C1	C1	Cluster_1	-1.079	0.664	0.293	0.385267	0	100.837	0.216371	0	100.837	0.216371	0	101.743	0.229276	0	97.7297	0.17122	0	96.8082	0.157553
Patient[T.Pat_1401]:Time[T.Late]	Pat_1401:Late	Pat_1401:Late_C0	C0	Cluster_0	-1.865	4.797	1.049	0.3822	0	184.108	0	0	184.108	0	0	185.099	0.00774481	0	184.896	0.00615703	0	171.254	-0.104417
Patient[T.Pat_453]:Time[T.Late]	Pat_453:Late	Pat_453:Late_C5	C5	Cluster_5	-2.152	3.602	0.918	0.3822	0	52.6425	0	0	52.6425	0	0	53.3443	0.0191058	0	52.8572	0.00587038	0	52.8416	0.00544549
Patient[T.Pat_272]:Time[T.Late]	Pat_272:Late	Pat_272:Late_C1	C1	Cluster_1	-2.478	0.683	0.632	0.381267	0	16.7074	-2.37709	0	16.7074	-2.37709	0	16.7074	-2.37709	0	16.7074	-2.37709	0	16.858	-2.36415
Patient[T.Pat_208]:Time[T.Late]	Pat_208:Late	Pat_208:Late_C3	C3	Cluster_3	-0.508	0.374	0.148	0.381133	0	21.9447	0	0	21.9447	0	0	21.9447	0	0	20.0649	-0.129198	0	20.093	-0.127176
Patient[T.Pat_309]:Time[T.Late]	Pat_309:Late	Pat_309:Late_C5	C5	Cluster_5	-1.744	0.321	0.425	0.377067	0	52.6425	0	0	52.7825	0.00383097	0	52.7825	0.00383097	0	53.0082	0.00998542	0	55.9465	0.0878177
Patient[T.Pat_1585]	Pat_1585	Pat_1585_C0	C0	Cluster_0	-0.904	0.351	0.244	0.373133	0	144.344	-0.351043	0	144.344	-0.351043	0	144.344	-0.351043	0	146.977	-0.324963	0	146.135	-0.333258
Patient[T.Pat_726]	Pat_726	Pat_726_C4	C4	Cluster_4	-0.854	1.452	0.4	0.3712	0	15.7187	-0.492929	0	15.7187	-0.492929	0	15.0489	-0.555756	0	15.1886	-0.542424	0	14.9783	-0.562536
Patient[T.Pat_1585]:Time[T.Late]	Pat_1585:Late	Pat_1585:Late_C2	C2	Cluster_2	-1.86	2.141	0.78	0.370533	0	11.502	0	0	11.502	0	0	11.0282	-0.0606956	0	10.6395	-0.112463	0	10.5753	-0.121186
Time[T.Late]	Time[T.Late]	Time[T.Late]_C2	C2	Cluster_2	-0.401	0.303	0.109	0.367467	0	11.502	0	0	11.502	0	0	11.502	0	0	11.4025	-0.0125343	0	11.4954	-0.00083109
Patient[T.Pat_1401]	Pat_1401	Pat_1401_C1	C1	Cluster_1	-0.635	0.683	0.196	0.364733	0	70.3866	-0.302276	0	70.3866	-0.302276	0	70.3866	-0.302276	0	63.222	-0.457151	0	49.455	-0.81146
Patient[T.Pat_1875]:Time[T.Late]	Pat_1875:Late	Pat_1875:Late_C4	C4	Cluster_4	-5.326	2.426	1.063	0.363667	0	22.1209	0	0	22.1209	0	0	19.6336	-0.172085	0	20.0253	-0.14359	0	24.5063	0.147739
Patient[T.Pat_1585]:Time[T.Late]	Pat_1585:Late	Pat_1585:Late_C6	C6	Cluster_6	-3.003	1.262	0.615	0.360867	0	24.57	0	0	24.57	0	0	23.5577	-0.0606956	0	22.7274	-0.112463	0	22.5904	-0.121186
Patient[T.Pat_1585]:Time[T.Late]	Pat_1585:Late	Pat_1585:Late_C5	C5	Cluster_5	-4.007	1.221	0.898	0.359333	0	52.6425	0	0	52.6425	0	0	50.4738	-0.0606956	0	48.6947	-0.112463	0	48.4012	-0.121186
Patient[T.Pat_198]	Pat_198	Pat_198_C1	C1	Cluster_1	-0.548	0.41	0.146	0.3556	0	81.5522	-0.0898535	0	81.5522	-0.0898535	0	77.3615	-0.16596	0	78.785	-0.139656	0	77.8768	-0.156384
Patient[T.Pat_1875]	Pat_1875	Pat_1875_C1	C1	Cluster_1	-0.908	0.821	0.267	0.355333	0	60.1517	-0.528971	0	60.1517	-0.528971	0	60.7285	-0.515203	0	60.7285	-0.515203	0	57.3344	-0.598176
Patient[T.Pat_272]:Time[T.Late]	Pat_272:Late	Pat_272:Late_C5	C5	Cluster_5	-1.439	2.339	0.562	0.354133	0	10.1336	-2.37709	0	10.1336	-2.37709	0	10.1336	-2.37709	0	10.1336	-2.37709	0	10.2249	-2.36415
Time[T.Late]	Time[T.Late]	Time[T.Late]_C0	C0	Cluster_0	-0.34	0.163	0.081	0.354067	0	184.108	0	0	184.108	0	0	184.108	0	0	182.516	-0.0125343	0	184.002	-0.00083109
Patient[T.Pat_208]:Time[T.Late]	Pat_208:Late	Pat_208:Late_C2	C2	Cluster_2	-0.577	0.852	0.274	0.348867	0	11.502	0	0	11.502	0	0	11.502	0	0	10.5168	-0.129198	0	10.5315	-0.127176
Patient[T.Pat_309]:Time[T.Late]	Pat_309:Late	Pat_309:Late_C4	C4	Cluster_4	-0.552	2.263	0.566	0.3454	0	22.1209	0	0	22.1798	0.00383097	0	22.1798	0.00383097	0	22.2746	0.00998542	0	23.5093	0.0878177
Patient[T.Pat_272]:Time[T.Late]	Pat_272:Late	Pat_272:Late_C7	C7	Cluster_7	-3.146	2.368	0.789	0.3316	0	1.86984	-2.37709	0	1.86984	-2.37709	0	1.86984	-2.37709	0	1.86984	-2.37709	0	1.88669	-2.36415
Patient[T.Pat_208]	Pat_208	Pat_208_C2	C2	Cluster_2	-1.325	1.227	0.372	0.327267	0	13.3632	0.216371	0	13.3632	0.216371	0	13.4832	0.229276	0	12.9514	0.17122	0	12.8293	0.157553
Patient[T.Pat_726]	Pat_726	Pat_726_C8	C8	Cluster_8	-1.835	0.467	0.487	0.318267	0	2.68546	-0.492929	0	2.68546	-0.492929	0	2.57102	-0.555756	0	2.59489	-0.542424	0	2.55897	-0.562536
Patient[T.Pat_272]:Time[T.Late]	Pat_272:Late	Pat_272:Late_C2	C2	Cluster_2	-2.003	2.028	0.567	0.3144	0	2.21411	-2.37709	0	2.21411	-2.37709	0	2.21411	-2.37709	0	2.21411	-2.37709	0	2.23407	-2.36415
Patient[T.Pat_309]	Pat_309	Pat_309_C2	C2	Cluster_2	-1.602	1.061	0.379	0.313267	0	7.59635	-0.598512	0	7.33203	-0.649605	0	7.33203	-0.649605	0	7.30639	-0.654659	0	7.41237	-0.633884
Patient[T.Pat_198]:Time[T.Late]	Pat_198:Late	Pat_198:Late_C4	C4	Cluster_4	-0.46	0.672	0.162	0.3118	0	22.1209	0	0	21.5641	-0.0367782	0	21.5641	-0.0367782	0	21.6874	-0.0285523	0	18.7038	-0.24208
Patient[T.Pat_726]	Pat_726	Pat_726_C7	C7	Cluster_7	-1.657	0.593	0.429	0.311533	0	6.90228	-0.492929	0	6.90228	-0.492929	0	6.60815	-0.555756	0	6.6695	-0.542424	0	6.57717	-0.562536
Patient[T.Pat_1401]	Pat_1401	Pat_1401_C8	C8	Cluster_8	-1.597	0.908	0.363	0.310133	0	3.06486	-0.302276	0	3.06486	-0.302276	0	3.06486	-0.302276	0	2.75289	-0.457151	0	2.15343	-0.81146
Patient[T.Pat_453]	Pat_453	Pat_453_C8	C8	Cluster_8	-2.184	1.184	0.482	0.3036	0	2.50044	-0.595915	0	2.95337	-0.355738	0	2.95337	-0.355738	0	2.95337	-0.355738	0	2.90095	-0.381575
Patient[T.Pat_453]	Pat_453	Pat_453_C5	C5	Cluster_5	-0.661	1.121	0.306	0.297667	0	34.8296	-0.595915	0	41.1386	-0.355738	0	41.1386	-0.355738	0	41.1386	-0.355738	0	40.4084	-0.381575
Patient[T.Pat_1335]	Pat_1335	Pat_1335_C0	C0	Cluster_0	-0.258	0.906	0.21	0.289	0	199.832	0.118235	0	199.832	0.118235	0	183.633	-0.00372878	0	183.633	-0.00372878	0	184.872	0.005971
Patient[T.Pat_208]	Pat_208	Pat_208_C8	C8	Cluster_8	-1.564	0.984	0.366	0.2846	0	4.39076	0.216371	0	4.39076	0.216371	0	4.43021	0.229276	0	4.25547	0.17122	0	4.21535	0.157553
Patient[T.Pat_208]	Pat_208	Pat_208_C0	C0	Cluster_0	-0.203	1.006	0.253	0.283867	0	213.898	0.216371	0	213.898	0.216371	0	215.82	0.229276	0	207.308	0.17122	0	205.353	0.157553
Patient[T.Pat_1875]	Pat_1875	Pat_1875_C8	C8	Cluster_8	-1.542	1.333	0.373	0.2702	0	2.6192	-0.528971	0	2.6192	-0.528971	0	2.64432	-0.515203	0	2.64432	-0.515203	0	2.49653	-0.598176
Patient[T.Pat_726]	Pat_726	Pat_726_C0	C0	Cluster_0	-1.231	0.195	0.291	0.267	0	130.824	-0.492929	0	130.824	-0.492929	0	125.249	-0.555756	0	126.412	-0.542424	0	124.662	-0.562536
Patient[T.Pat_309]	Pat_309	Pat_309_C0	C0	Cluster_0	-1.224	0.31	0.287	0.265867	0	121.592	-0.598512	0	117.361	-0.649605	0	117.361	-0.649605	0	116.95	-0.654659	0	118.647	-0.633884
Patient[T.Pat_309]	Pat_309	Pat_309_C1	C1	Cluster_1	-1.157	0.849	0.269	0.264667	0	57.321	-0.598512	0	55.3265	-0.649605	0	55.3265	-0.649605	0	55.133	-0.654659	0	55.9327	-0.633884
Patient[T.Pat_1875]	Pat_1875	Pat_1875_C6	C6	Cluster_6	-2.066	0.537	0.489	0.262467	0	17.0282	-0.528971	0	17.0282	-0.528971	0	17.1915	-0.515203	0	17.1915	-0.515203	0	16.2306	-0.598176
Patient[T.Pat_208]	Pat_208	Pat_208_C3	C3	Cluster_3	-1.527	0.738	0.232	0.181067	0	25.4955	0.216371	0	25.4955	0.216371	0	25.7246	0.229276	0	24.7099	0.17122	0	24.4769	0.157553
Patient[T.Pat_208]	Pat_208	Pat_208_C9	C9	Cluster_9	0	0	0	0	0	12.2497	0.216371	0	12.2497	0.216371	0	12.3598	0.229276	0	11.8723	0.17122	0	11.7603	0.157553
Patient[T.Pat_1335]	Pat_1335	Pat_1335_C9	C9	Cluster_9	0	0	0	0	0	11.4442	0.118235	0	11.4442	0.118235	0	10.5164	-0.00372878	0	10.5164	-0.00372878	0	10.5874	0.005971
Patient[T.Pat_267]	Pat_267	Pat_267_C9	C9	Cluster_9	0	0	0	0	0	10.5437	0	0	10.1216	-0.0589371	0	11.7379	0.154794	0	10.9169	0.0501867	0	11.0748	0.0708988
Patient[T.Pat_272]	Pat_272	Pat_272_C9	C9	Cluster_9	0	0	0	0	0	10.5437	0	0	10.5437	0	0	10.5437	0	0	10.657	0.0154235	0	13.0699	0.309868
Time[T.Late]	Time[T.Late]	Time[T.Late]_C9	C9	Cluster_9	0	0	0	0	0	10.5437	0	0	10.5437	0	0	10.5437	0	0	10.4525	-0.0125343	0	10.5376	-0.00083109
Patient[T.Pat_1335]:Time[T.Late]	Pat_1335:Late	Pat_1335:Late_C9	C9	Cluster_9	0	0	0	0	0	10.5437	0	0	10.5426	-0.000147043	0	9.3529	-0.17289	0	9.49209	-0.151578	0	9.65679	-0.12676
Patient[T.Pat_1401]:Time[T.Late]	Pat_1401:Late	Pat_1401:Late_C9	C9	Cluster_9	0	0	0	0	0	10.5437	0	0	10.5437	0	0	10.6004	0.00774481	0	10.5888	0.00615703	0	9.80751	-0.104417
Patient[T.Pat_1585]:Time[T.Late]	Pat_1585:Late	Pat_1585:Late_C9	C9	Cluster_9	0	0	0	0	0	10.5437	0	0	10.5437	0	0	10.1093	-0.0606956	0	9.75296	-0.112463	0	9.69417	-0.121186
Patient[T.Pat_1875]:Time[T.Late]	Pat_1875:Late	Pat_1875:Late_C9	C9	Cluster_9	0	0	0	0	0	10.5437	0	0	10.5437	0	0	9.35812	-0.172085	0	9.54479	-0.14359	0	11.6806	0.147739
Patient[T.Pat_198]:Time[T.Late]	Pat_198:Late	Pat_198:Late_C9	C9	Cluster_9	0	0	0	0	0	10.5437	0	0	10.2783	-0.0367782	0	10.2783	-0.0367782	0	10.337	-0.0285523	0	8.91493	-0.24208
Patient[T.Pat_208]:Time[T.Late]	Pat_208:Late	Pat_208:Late_C9	C9	Cluster_9	0	0	0	0	0	10.5437	0	0	10.5437	0	0	10.5437	0	0	9.64048	-0.129198	0	9.654	-0.127176
Patient[T.Pat_267]:Time[T.Late]	Pat_267:Late	Pat_267:Late_C9	C9	Cluster_9	0	0	0	0	0	10.5437	0	0	9.64329	-0.128778	0	9.70281	-0.119901	0	10.1844	-0.0500086	0	9.66395	-0.125691
Patient[T.Pat_309]:Time[T.Late]	Pat_309:Late	Pat_309:Late_C9	C9	Cluster_9	0	0	0	0	0	10.5437	0	0	10.5717	0.00383097	0	10.5717	0.00383097	0	10.6169	0.00998542	0	11.2054	0.0878177
Patient[T.Pat_453]:Time[T.Late]	Pat_453:Late	Pat_453:Late_C9	C9	Cluster_9	0	0	0	0	0	10.5437	0	0	10.5437	0	0	10.6842	0.0191058	0	10.5866	0.00587038	0	10.5835	0.00544549
Patient[T.Pat_726]:Time[T.Late]	Pat_726:Late	Pat_726:Late_C9	C9	Cluster_9	0	0	0	0	0	10.5437	0	0	10.5479	0.000581933	0	10.5479	0.000581933	0	8.93118	-0.239453	0	5.92991	-0.830294
Patient[T.Pat_198]	Pat_198	Pat_198_C9	C9	Cluster_9	0	0	0	0	0	9.90701	-0.0898535	0	9.90701	-0.0898535	0	9.39793	-0.16596	0	9.57086	-0.139656	0	9.46052	-0.156384
Patient[T.Pat_1401]	Pat_1401	Pat_1401_C9	C9	Cluster_9	0	0	0	0	0	8.55061	-0.302276	0	8.55061	-0.302276	0	8.55061	-0.302276	0	7.68025	-0.457151	0	6.00783	-0.81146
Patient[T.Pat_1585]	Pat_1585	Pat_1585_C9	C9	Cluster_9	0	0	0	0	0	8.26641	-0.351043	0	8.26641	-0.351043	0	8.26641	-0.351043	0	8.4172	-0.324963	0	8.36894	-0.333258
Patient[T.Pat_726]	Pat_726	Pat_726_C9	C9	Cluster_9	0	0	0	0	0	7.49212	-0.492929	0	7.49212	-0.492929	0	7.17286	-0.555756	0	7.23945	-0.542424	0	7.13923	-0.562536
Patient[T.Pat_1875]	Pat_1875	Pat_1875_C9	C9	Cluster_9	0	0	0	0	0	7.30727	-0.528971	0	7.30727	-0.528971	0	7.37734	-0.515203	0	7.37734	-0.515203	0	6.96502	-0.598176
Patient[T.Pat_453]	Pat_453	Pat_453_C9	C9	Cluster_9	0	0	0	0	0	6.97594	-0.595915	0	8.23955	-0.355738	0	8.23955	-0.355738	0	8.23955	-0.355738	0	8.0933	-0.381575
Patient[T.Pat_309]	Pat_309	Pat_309_C9	C9	Cluster_9	0	0	0	0	0	6.9634	-0.598512	0	6.7211	-0.649605	0	6.7211	-0.649605	0	6.6976	-0.654659	0	6.79475	-0.633884
Patient[T.Pat_272]:Time[T.Late]	Pat_272:Late	Pat_272:Late_C9	C9	Cluster_9	0	0	0	0	0	2.02963	-2.37709	0	2.02963	-2.37709	0	2.02963	-2.37709	0	2.02963	-2.37709	0	2.04792	-2.36415

## Sheet: Effects - Time
Covariate	Covariate		Cell Type	Cell Type	HDI 3%	HDI 97%	SD	Inclusion probability	Final Parameter @ FDR 0.05	Expected Sample @ FDR 0.05	log2-fold change @ FDR 0.05	Final Parameter @ FDR 0.1	Expected Sample @ FDR 0.1	log2-fold change @ FDR 0.1	Final Parameter @ FDR 0.2	Expected Sample @ FDR 0.2	log2-fold change @ FDR 0.2	Final Parameter @ FDR 0.3	Expected Sample @ FDR 0.3	log2-fold change @ FDR 0.3	Final Parameter @ FDR 0.4	Expected Sample @ FDR 0.4	log2-fold change @ FDR 0.4
Time[T.Late]	Time[T.Late]	Time[T.Late]_C10	C10	Cluster_10	-0.341	0.46	0.14	0.541867	0	4.99044	0	0	4.99044	0	0	4.99044	0	0.0389993	5.14402	0.0437297	0.0389993	5.18592	0.0554329
Time[T.Late]	Time[T.Late]	Time[T.Late]_C3	C3	Cluster_3	-0.324	0.983	0.282	0.5398	0	21.9447	0	0	21.9447	0	0	21.9447	0	0.151016	25.3012	0.205336	0.151016	25.5073	0.21704
Time[T.Late]	Time[T.Late]	Time[T.Late]_C7	C7	Cluster_7	-0.419	0.491	0.165	0.509333	0	9.71358	0	0	9.71358	0	0	9.71358	0	0	9.62955	-0.0125343	0.021147	9.91546	0.0296776
Time[T.Late]	Time[T.Late]	Time[T.Late]_C4	C4	Cluster_4	-0.57	0.483	0.18	0.4904	0	22.1209	0	0	22.1209	0	0	22.1209	0	0	21.9296	-0.0125343	-0.0436158	21.1647	-0.0637553
Time[T.Late]	Time[T.Late]	Time[T.Late]_C5	C5	Cluster_5	-0.468	0.562	0.163	0.4894	0	52.6425	0	0	52.6425	0	0	52.6425	0	0	52.1872	-0.0125343	-0.0080023	52.1929	-0.012376
Time[T.Late]	Time[T.Late]	Time[T.Late]_C8	C8	Cluster_8	-0.787	0.544	0.223	0.483333	0	3.77925	0	0	3.77925	0	0	3.77925	0	0	3.74655	-0.0125343	-0.0332065	3.65371	-0.048738
Time[T.Late]	Time[T.Late]	Time[T.Late]_C1	C1	Cluster_1	-0.373	0.407	0.128	0.480867	0	86.7929	0	0	86.7929	0	0	86.7929	0	0	86.0421	-0.0125343	-0.0315686	84.0473	-0.0463749
Time[T.Late]	Time[T.Late]	Time[T.Late]_C6	C6	Cluster_6	-0.356	0.443	0.138	0.474133	0	24.57	0	0	24.57	0	0	24.57	0	0	24.3574	-0.0125343	0.0181563	25.0057	0.025363
Time[T.Late]	Time[T.Late]	Time[T.Late]_C2	C2	Cluster_2	-0.401	0.303	0.109	0.367467	0	11.502	0	0	11.502	0	0	11.502	0	0	11.4025	-0.0125343	0	11.4954	-0.00083109
Time[T.Late]	Time[T.Late]	Time[T.Late]_C0	C0	Cluster_0	-0.34	0.163	0.081	0.354067	0	184.108	0	0	184.108	0	0	184.108	0	0	182.516	-0.0125343	0	184.002	-0.00083109
Time[T.Late]	Time[T.Late]	Time[T.Late]_C9	C9	Cluster_9	0	0	0	0	0	10.5437	0	0	10.5437	0	0	10.5437	0	0	10.4525	-0.0125343	0	10.5376	-0.00083109

## Sheet: Effects - Patients
Covariate	Covariate		Cell Type	Cell Type	HDI 3%	HDI 97%	SD	Inclusion probability	Final Parameter @ FDR 0.05	Expected Sample @ FDR 0.05	log2-fold change @ FDR 0.05	Final Parameter @ FDR 0.1	Expected Sample @ FDR 0.1	log2-fold change @ FDR 0.1	Final Parameter @ FDR 0.2	Expected Sample @ FDR 0.2	log2-fold change @ FDR 0.2	Final Parameter @ FDR 0.3	Expected Sample @ FDR 0.3	log2-fold change @ FDR 0.3	Final Parameter @ FDR 0.4	Expected Sample @ FDR 0.4	log2-fold change @ FDR 0.4
Patient[T.Pat_1875]	Pat_1875	Pat_1875_C2	C2	Cluster_2	2.539	4.201	0.453	1	3.39622	237.956	4.37073	3.39622	237.956	4.37073	3.39622	240.238	4.3845	3.39622	240.238	4.3845	3.39622	226.811	4.30153
Patient[T.Pat_726]	Pat_726	Pat_726_C3	C3	Cluster_3	1.638	3.292	0.448	1	2.44333	179.502	3.03206	2.44333	179.502	3.03206	2.44333	171.853	2.96923	2.44333	173.448	2.98256	2.44333	171.047	2.96245
Patient[T.Pat_1401]	Pat_1401	Pat_1401_C10	C10	Cluster_10	0.446	3.168	0.723	0.999467	1.77921	23.9798	2.26458	1.77921	23.9798	2.26458	1.77921	23.9798	2.26458	1.77921	21.5389	2.1097	1.77921	16.8487	1.75539
Patient[T.Pat_453]	Pat_453	Pat_453_C2	C2	Cluster_2	1.176	3.215	0.548	0.999467	2.13355	64.265	2.48214	2.13355	75.9059	2.72232	2.13355	75.9059	2.72232	2.13355	75.9059	2.72232	2.13355	74.5586	2.69648
Patient[T.Pat_1585]	Pat_1585	Pat_1585_C7	C7	Cluster_7	0.35	2.557	0.595	0.998333	1.48538	33.6353	1.7919	1.48538	33.6353	1.7919	1.48538	33.6353	1.7919	1.48538	34.2489	1.81798	1.48538	34.0525	1.80969
Patient[T.Pat_1401]	Pat_1401	Pat_1401_C6	C6	Cluster_6	0.43	2.507	0.556	0.9982	1.41211	81.7869	1.73497	1.41211	81.7869	1.73497	1.41211	81.7869	1.73497	1.41211	73.4618	1.5801	1.41211	57.4651	1.22579
Patient[T.Pat_1335]	Pat_1335	Pat_1335_C5	C5	Cluster_5	-1.875	0	0.535	0.9834	-1.04066	20.1826	-1.38312	-1.04066	20.1826	-1.38312	-1.04066	18.5465	-1.50508	-1.04066	18.5465	-1.50508	-1.04066	18.6716	-1.49538
Patient[T.Pat_453]	Pat_453	Pat_453_C4	C4	Cluster_4	0.331	2.695	0.634	0.963933	1.49931	65.5476	1.56713	1.49931	77.4207	1.80731	1.49931	77.4207	1.80731	1.49931	77.4207	1.80731	1.49931	76.0465	1.78147
Patient[T.Pat_1875]	Pat_1875	Pat_1875_C0	C0	Cluster_0	-1.621	0.004	0.47	0.956133	-0.811396	56.6829	-1.69957	-0.811396	56.6829	-1.69957	-0.811396	57.2265	-1.6858	-0.811396	57.2265	-1.6858	-0.811396	54.0281	-1.76877
Patient[T.Pat_208]	Pat_208	Pat_208_C6	C6	Cluster_6	-3.748	-0.176	1.032	0.953733	-2.02962	3.75049	-2.71175	-2.02962	3.75049	-2.71175	-2.02962	3.78419	-2.69884	-2.02962	3.63493	-2.7569	-2.02962	3.60066	-2.77056
Patient[T.Pat_309]	Pat_309	Pat_309_C4	C4	Cluster_4	1.074	3.235	0.769	0.938667	2.14732	125.084	2.49941	2.14732	120.731	2.44832	2.14732	120.731	2.44832	2.14732	120.309	2.44326	2.14732	122.054	2.46404
Patient[T.Pat_1875]	Pat_1875	Pat_1875_C5	C5	Cluster_5	-2.536	0.005	0.713	0.9324	-1.27128	10.2328	-2.36303	-1.27128	10.2328	-2.36303	-1.27128	10.3309	-2.34927	-1.27128	10.3309	-2.34927	-1.27128	9.75349	-2.43224
Patient[T.Pat_453]	Pat_453	Pat_453_C6	C6	Cluster_6	0.408	2.045	0.527	0.9324	1.22081	55.1071	1.16534	1.22081	65.0891	1.40552	1.22081	65.0891	1.40552	1.22081	65.0891	1.40552	1.22081	63.9338	1.37968
Patient[T.Pat_198]	Pat_198	Pat_198_C6	C6	Cluster_6	-0.22	1.845	0.626	0.9316	0.756937	49.2141	1.00218	0.756937	49.2141	1.00218	0.756937	46.6852	0.92607	0.756937	47.5442	0.952374	0.756937	46.9961	0.935646
Patient[T.Pat_1585]	Pat_1585	Pat_1585_C1	C1	Cluster_1	0.092	1.332	0.38	0.901067	0.688661	135.485	0.642484	0.688661	135.485	0.642484	0.688661	135.485	0.642484	0.688661	137.956	0.668565	0.688661	137.166	0.660269
Patient[T.Pat_208]	Pat_208	Pat_208_C5	C5	Cluster_5	-2.406	-0.292	0.687	0.897333	-1.34465	15.9402	-1.72355	-1.34465	15.9402	-1.72355	-1.34465	16.0835	-1.71065	-1.34465	15.4491	-1.76871	-1.34465	15.3034	-1.78237
Patient[T.Pat_309]	Pat_309	Pat_309_C7	C7	Cluster_7	0.762	2.93	0.809	0.890733	1.89959	42.8735	2.14201	1.89959	41.3817	2.09092	1.89959	41.3817	2.09092	1.89959	41.237	2.08586	1.89959	41.8351	2.10664
Patient[T.Pat_726]	Pat_726	Pat_726_C1	C1	Cluster_1	-1.922	-0.292	0.517	0.8718	-0.986411	22.9988	-1.91602	-0.986411	22.9988	-1.91602	-0.986411	22.0187	-1.97885	-0.986411	22.2231	-1.96551	-0.986411	21.9155	-1.98563
Patient[T.Pat_453]	Pat_453	Pat_453_C3	C3	Cluster_3	-2.439	0.035	0.75	0.8502	0	14.5191	-0.595915	-1.30635	4.64407	-2.24041	-1.30635	4.64407	-2.24041	-1.30635	4.64407	-2.24041	-1.30635	4.56164	-2.26625
Patient[T.Pat_453]	Pat_453	Pat_453_C0	C0	Cluster_0	-1.22	0.009	0.401	0.804733	0	121.811	-0.595915	-0.612233	78.0003	-1.239	-0.612233	78.0003	-1.239	-0.612233	78.0003	-1.239	-0.612233	76.6159	-1.26484
Patient[T.Pat_309]	Pat_309	Pat_309_C3	C3	Cluster_3	-0.192	1.798	0.561	0.777867	0	14.493	-0.598512	0.730597	29.0451	0.404423	0.730597	29.0451	0.404423	0.730597	28.9435	0.399369	0.730597	29.3633	0.420144
Patient[T.Pat_267]	Pat_267	Pat_267_C5	C5	Cluster_5	-0.832	1.616	0.554	0.752267	0	52.6425	0	0.294718	67.8562	0.366251	0.294718	78.6917	0.579982	0.294718	73.1878	0.475375	0.294718	74.2461	0.496087
Patient[T.Pat_1335]	Pat_1335	Pat_1335_C6	C6	Cluster_6	-2.011	0.061	0.662	0.735	0	26.6684	0.118235	0	26.6684	0.118235	-0.964841	9.33806	-1.3957	-0.964841	9.33806	-1.3957	-0.964841	9.40106	-1.386
Patient[T.Pat_267]	Pat_267	Pat_267_C1	C1	Cluster_1	-0.691	1.744	0.544	0.720267	0	86.7929	0	0	83.3187	-0.0589371	0.303394	130.871	0.592498	0.303394	121.718	0.487891	0.303394	123.478	0.508603
Patient[T.Pat_267]	Pat_267	Pat_267_C8	C8	Cluster_8	-0.73	1.888	0.621	0.719933	0	3.77925	0	0	3.62797	-0.0589371	0.371479	6.10006	0.690725	0.371479	5.67341	0.586117	0.371479	5.75545	0.606829
Patient[T.Pat_198]	Pat_198	Pat_198_C0	C0	Cluster_0	-0.399	0.82	0.281	0.701	0	172.992	-0.0898535	0	172.992	-0.0898535	0.127069	186.337	0.0173617	0.127069	189.766	0.0436661	0.127069	187.578	0.026938
Patient[T.Pat_1335]	Pat_1335	Pat_1335_C10	C10	Cluster_10	-1.166	1.759	0.616	0.700933	0	5.41666	0.118235	0	5.41666	0.118235	0.237178	6.30989	0.338446	0.237178	6.30989	0.338446	0.237178	6.35245	0.348146
Patient[T.Pat_267]	Pat_267	Pat_267_C4	C4	Cluster_4	-2.537	0.49	0.893	0.696133	0	22.1209	0	0	21.2355	-0.0589371	-0.852287	10.5016	-1.0748	-0.852287	9.76714	-1.1794	-0.852287	9.90838	-1.15869
Patient[T.Pat_267]	Pat_267	Pat_267_C0	C0	Cluster_0	-1.684	0.611	0.578	0.692733	0	184.108	0	0	176.739	-0.0589371	-0.587949	113.849	-0.693437	-0.587949	105.886	-0.798044	-0.587949	107.417	-0.777332
Patient[T.Pat_1335]	Pat_1335	Pat_1335_C1	C1	Cluster_1	-0.096	1.19	0.391	0.691333	0	94.2055	0.118235	0	94.2055	0.118235	0.524579	146.279	0.753079	0.524579	146.279	0.753079	0.524579	147.266	0.762779
Patient[T.Pat_1335]	Pat_1335	Pat_1335_C3	C3	Cluster_3	-1.842	0.274	0.592	0.688133	0	23.8189	0.118235	0	23.8189	0.118235	-0.679843	11.0906	-0.984534	-0.679843	11.0906	-0.984534	-0.679843	11.1654	-0.974835
Patient[T.Pat_726]	Pat_726	Pat_726_C6	C6	Cluster_6	-0.072	1.439	0.488	0.6704	0	17.4589	-0.492929	0	17.4589	-0.492929	0.743441	35.1542	0.516803	0.743441	35.4806	0.530135	0.743441	34.9894	0.510023
Patient[T.Pat_1875]	Pat_1875	Pat_1875_C7	C7	Cluster_7	-2.414	0.374	0.779	0.665333	0	6.73198	-0.528971	0	6.73198	-0.528971	-0.942848	2.64737	-1.87544	-0.942848	2.64737	-1.87544	-0.942848	2.49941	-1.95842
Patient[T.Pat_208]	Pat_208	Pat_208_C10	C10	Cluster_10	-2.728	0.358	0.904	0.6528	0	5.79793	0.216371	0	5.79793	0.216371	-1.09254	1.96189	-1.34692	-1.09254	1.88451	-1.40498	-1.09254	1.86674	-1.41865
Patient[T.Pat_272]	Pat_272	Pat_272_C10	C10	Cluster_10	-1.457	1.057	0.493	0.642933	0	4.99044	0	0	4.99044	0	0	4.99044	0	-0.0160664	4.96369	-0.00775547	-0.0160664	6.08753	0.286689
Patient[T.Pat_267]	Pat_267	Pat_267_C3	C3	Cluster_3	-0.284	2.087	0.689	0.6236	0	21.9447	0	0	21.0663	-0.0589371	0	24.4302	0.154794	0.935349	57.8967	1.39961	0.935349	58.7339	1.42032
Patient[T.Pat_1585]	Pat_1585	Pat_1585_C4	C4	Cluster_4	-1.421	0.315	0.468	0.6196	0	17.3432	-0.351043	0	17.3432	-0.351043	0	17.3432	-0.351043	-0.592348	9.76622	-1.17954	-0.592348	9.71023	-1.18784
Patient[T.Pat_726]	Pat_726	Pat_726_C2	C2	Cluster_2	-2.124	0.361	0.64	0.610933	0	8.17313	-0.492929	0	8.17313	-0.492929	0	7.82485	-0.555756	-0.710647	3.88024	-1.56767	-0.710647	3.82653	-1.58778
Patient[T.Pat_267]	Pat_267	Pat_267_C2	C2	Cluster_2	-1.792	0.528	0.576	0.609067	0	11.502	0	0	11.0416	-0.0589371	0	12.8048	0.154794	-0.53163	6.9984	-0.716794	-0.53163	7.09959	-0.696082
Patient[T.Pat_1401]	Pat_1401	Pat_1401_C4	C4	Cluster_4	-1.939	0.612	0.607	0.6052	0	17.9395	-0.302276	0	17.9395	-0.302276	0	17.9395	-0.302276	-0.601362	8.83119	-1.32473	-0.601362	6.90815	-1.67904
Patient[T.Pat_198]	Pat_198	Pat_198_C3	C3	Cluster_3	-2	0.276	0.584	0.597267	0	20.6196	-0.0898535	0	20.6196	-0.0898535	0	19.5601	-0.16596	-0.638202	10.5226	-1.06039	-0.638202	10.4012	-1.07711
Patient[T.Pat_198]	Pat_198	Pat_198_C2	C2	Cluster_2	-0.565	0.842	0.272	0.5776	0	10.8075	-0.0898535	0	10.8075	-0.0898535	0	10.2522	-0.16596	0.128826	11.8763	0.0462011	0.128826	11.7394	0.029473
Patient[T.Pat_309]	Pat_309	Pat_309_C10	C10	Cluster_10	-0.95	1.916	0.586	0.5706	0	3.29586	-0.598512	0	3.18118	-0.649605	0	3.18118	-0.649605	0.390254	4.6833	-0.0916418	0.390254	4.75123	-0.0708665
Patient[T.Pat_208]	Pat_208	Pat_208_C7	C7	Cluster_7	-0.481	2.38	0.735	0.568933	0	11.2853	0.216371	0	11.2853	0.216371	0	11.3867	0.229276	0.940162	28.0046	1.52759	0.940162	27.7405	1.51392
Patient[T.Pat_1401]	Pat_1401	Pat_1401_C3	C3	Cluster_3	-1.993	0.253	0.623	0.548467	0	17.7965	-0.302276	0	17.7965	-0.302276	0	17.7965	-0.302276	-0.83577	6.93015	-1.66291	-0.83577	5.42107	-2.01722
Patient[T.Pat_272]	Pat_272	Pat_272_C7	C7	Cluster_7	-0.937	1.194	0.394	0.546733	0	9.71358	0	0	9.71358	0	0	9.71358	0	0.112158	10.9833	0.177233	0.112158	13.47	0.471678
Patient[T.Pat_272]	Pat_272	Pat_272_C6	C6	Cluster_6	-1.684	0.905	0.521	0.538867	0	24.57	0	0	24.57	0	0	24.57	0	-0.238945	19.5558	-0.329301	-0.238945	23.9835	-0.034856
Patient[T.Pat_1401]	Pat_1401	Pat_1401_C5	C5	Cluster_5	-0.069	1.86	0.604	0.536867	0	42.6916	-0.302276	0	42.6916	-0.302276	0	42.6916	-0.302276	0.945721	98.7284	0.907236	0.945721	77.2297	0.552927
Patient[T.Pat_272]	Pat_272	Pat_272_C8	C8	Cluster_8	-1.31	0.96	0.432	0.5338	0	3.77925	0	0	3.77925	0	0	3.77925	0	-0.127549	3.36244	-0.168591	-0.127549	4.12374	0.125853
Patient[T.Pat_272]	Pat_272	Pat_272_C3	C3	Cluster_3	-1.281	0.472	0.356	0.5308	0	21.9447	0	0	21.9447	0	0	21.9447	0	0	22.1805	0.0154235	-0.25882	20.9993	-0.0635308
Patient[T.Pat_272]	Pat_272	Pat_272_C2	C2	Cluster_2	-0.706	0.859	0.309	0.524067	0	11.502	0	0	11.502	0	0	11.502	0	0	11.6257	0.0154235	0.0196787	14.5412	0.338259
Patient[T.Pat_272]	Pat_272	Pat_272_C5	C5	Cluster_5	-1.207	1.025	0.39	0.514667	0	52.6425	0	0	52.6425	0	0	52.6425	0	0	53.2083	0.0154235	-0.0166784	64.1761	0.285806
Patient[T.Pat_1335]	Pat_1335	Pat_1335_C8	C8	Cluster_8	-0.538	1.397	0.422	0.513067	0	4.10202	0.118235	0	4.10202	0.118235	0	3.76949	-0.00372878	0	3.76949	-0.00372878	0.346218	5.36492	0.505458
Patient[T.Pat_1585]	Pat_1585	Pat_1585_C8	C8	Cluster_8	-2.044	0.638	0.632	0.5126	0	2.96299	-0.351043	0	2.96299	-0.351043	0	2.96299	-0.351043	0	3.01704	-0.324963	-0.619586	1.61436	-1.22713
Patient[T.Pat_198]	Pat_198	Pat_198_C10	C10	Cluster_10	-1.17	0.781	0.367	0.502667	0	4.68911	-0.0898535	0	4.68911	-0.0898535	0	4.44816	-0.16596	0	4.53	-0.139656	-0.177042	3.75124	-0.411802
Patient[T.Pat_1585]	Pat_1585	Pat_1585_C2	C2	Cluster_2	-0.747	0.993	0.326	0.500933	0	9.0178	-0.351043	0	9.0178	-0.351043	0	9.0178	-0.351043	0	9.1823	-0.324963	0.0622976	9.7165	-0.243382
Patient[T.Pat_1335]	Pat_1335	Pat_1335_C4	C4	Cluster_4	-1.241	0.442	0.369	0.4992	0	24.0102	0.118235	0	24.0102	0.118235	0	22.0638	-0.00372878	0	22.0638	-0.00372878	-0.315424	16.2037	-0.44909
Patient[T.Pat_1335]	Pat_1335	Pat_1335_C7	C7	Cluster_7	-0.837	1.321	0.393	0.4896	0	10.5432	0.118235	0	10.5432	0.118235	0	9.6885	-0.00372878	0	9.6885	-0.00372878	0.216174	12.1076	0.317844
Patient[T.Pat_1585]	Pat_1585	Pat_1585_C3	C3	Cluster_3	-0.578	1.342	0.389	0.488733	0	17.205	-0.351043	0	17.205	-0.351043	0	17.205	-0.351043	0	17.5188	-0.324963	0.286819	23.2045	0.0805335
Patient[T.Pat_1585]	Pat_1585	Pat_1585_C10	C10	Cluster_10	-1.065	0.912	0.35	0.4874	0	3.91259	-0.351043	0	3.91259	-0.351043	0	3.91259	-0.351043	0	3.98396	-0.324963	-0.0568879	3.74207	-0.41533
Patient[T.Pat_309]	Pat_309	Pat_309_C8	C8	Cluster_8	-1.452	1.277	0.484	0.4846	0	2.49595	-0.598512	0	2.4091	-0.649605	0	2.4091	-0.649605	0	2.40067	-0.654659	-0.208357	1.97742	-0.93448
Patient[T.Pat_1585]	Pat_1585	Pat_1585_C5	C5	Cluster_5	-0.811	0.645	0.261	0.482867	0	41.2726	-0.351043	0	41.2726	-0.351043	0	41.2726	-0.351043	0	42.0255	-0.324963	-0.0563037	39.497	-0.414487
Patient[T.Pat_1335]	Pat_1335	Pat_1335_C2	C2	Cluster_2	-0.949	0.685	0.291	0.480133	0	12.4844	0.118235	0	12.4844	0.118235	0	11.4724	-0.00372878	0	11.4724	-0.00372878	-0.074936	10.7159	-0.102139
Patient[T.Pat_1401]	Pat_1401	Pat_1401_C0	C0	Cluster_0	-0.051	1.3	0.417	0.4792	0	149.307	-0.302276	0	149.307	-0.302276	0	149.307	-0.302276	0	134.109	-0.457151	0.65362	201.68	0.131514
Patient[T.Pat_272]	Pat_272	Pat_272_C0	C0	Cluster_0	-2.611	0.962	0.729	0.477733	0	184.108	0	0	184.108	0	0	184.108	0	0	186.087	0.0154235	-0.501906	138.159	-0.414229
Patient[T.Pat_1875]	Pat_1875	Pat_1875_C4	C4	Cluster_4	-0.196	1.67	0.523	0.475467	0	15.3309	-0.528971	0	15.3309	-0.528971	0	15.4779	-0.515203	0	15.4779	-0.515203	0.746324	30.8219	0.478542
Patient[T.Pat_726]	Pat_726	Pat_726_C10	C10	Cluster_10	-2.455	0.452	0.672	0.474467	0	3.54611	-0.492929	0	3.54611	-0.492929	0	3.395	-0.555756	0	3.42652	-0.542424	-0.761162	1.57845	-1.66066
Patient[T.Pat_1401]	Pat_1401	Pat_1401_C7	C7	Cluster_7	-0.916	1.269	0.42	0.473333	0	7.87744	-0.302276	0	7.87744	-0.302276	0	7.87744	-0.302276	0	7.0756	-0.457151	0.087773	6.04261	-0.684831
Patient[T.Pat_267]	Pat_267	Pat_267_C6	C6	Cluster_6	-1.173	0.679	0.382	0.471667	0	24.57	0	0	23.5865	-0.0589371	0	27.3528	0.154794	0	25.4397	0.0501867	-0.276942	19.5647	-0.328643
Patient[T.Pat_267]	Pat_267	Pat_267_C7	C7	Cluster_7	-1.046	1.138	0.381	0.4666	0	9.71358	0	0	9.32475	-0.0589371	0	10.8138	0.154794	0	10.0574	0.0501867	0.0694319	10.9364	0.171068
Patient[T.Pat_453]	Pat_453	Pat_453_C10	C10	Cluster_10	-2.22	1.1	0.68	0.464867	0	3.3018	-0.595915	0	3.89988	-0.355738	0	3.89988	-0.355738	0	3.89988	-0.355738	-0.577409	2.15034	-1.2146
Patient[T.Pat_309]	Pat_309	Pat_309_C5	C5	Cluster_5	-1.377	0.986	0.432	0.464133	0	34.767	-0.598512	0	33.5572	-0.649605	0	33.5572	-0.649605	0	33.4399	-0.654659	-0.18814	28.1068	-0.905312
Patient[T.Pat_198]	Pat_198	Pat_198_C8	C8	Cluster_8	-1.25	0.711	0.378	0.4546	0	3.55105	-0.0898535	0	3.55105	-0.0898535	0	3.36857	-0.16596	0	3.43056	-0.139656	-0.232341	2.68797	-0.491582
Patient[T.Pat_267]	Pat_267	Pat_267_C10	C10	Cluster_10	-1.425	1.314	0.458	0.453867	0	4.99044	0	0	4.79068	-0.0589371	0	5.55567	0.154794	0	5.1671	0.0501867	-0.153894	4.49414	-0.151123
Patient[T.Pat_453]	Pat_453	Pat_453_C1	C1	Cluster_1	-0.918	1.068	0.352	0.444867	0	57.4243	-0.595915	0	67.826	-0.355738	0	67.826	-0.355738	0	67.826	-0.355738	0.13147	75.9828	-0.191904
Patient[T.Pat_1401]	Pat_1401	Pat_1401_C2	C2	Cluster_2	-2.328	0.433	0.648	0.444533	0	9.32783	-0.302276	0	9.32783	-0.302276	0	9.32783	-0.302276	0	8.37836	-0.457151	-0.628254	3.49666	-1.71784
Patient[T.Pat_272]	Pat_272	Pat_272_C4	C4	Cluster_4	-1.009	1.104	0.344	0.443733	0	22.1209	0	0	22.1209	0	0	22.1209	0	0	22.3587	0.0154235	-0.0337667	26.5105	0.261153
Patient[T.Pat_198]	Pat_198	Pat_198_C5	C5	Cluster_5	-0.404	0.73	0.21	0.4322	0	49.4639	-0.0898535	0	49.4639	-0.0898535	0	46.9221	-0.16596	0	47.7855	-0.139656	0.150932	54.93	0.0613645
Patient[T.Pat_1875]	Pat_1875	Pat_1875_C3	C3	Cluster_3	-0.416	1.448	0.413	0.4288	0	15.2087	-0.528971	0	15.2087	-0.528971	0	15.3546	-0.515203	0	15.3546	-0.515203	0.448813	22.7079	0.0493242
Patient[T.Pat_1875]	Pat_1875	Pat_1875_C10	C10	Cluster_10	-1.248	1.232	0.505	0.428733	0	3.45862	-0.528971	0	3.45862	-0.528971	0	3.49178	-0.515203	0	3.49178	-0.515203	-0.0744658	3.06006	-0.705607
Patient[T.Pat_726]	Pat_726	Pat_726_C5	C5	Cluster_5	-0.644	0.997	0.305	0.414933	0	37.4068	-0.492929	0	37.4068	-0.492929	0	35.8127	-0.555756	0	36.1452	-0.542424	0.197682	43.4359	-0.277342
Patient[T.Pat_198]	Pat_198	Pat_198_C7	C7	Cluster_7	-1.288	0.623	0.348	0.410933	0	9.12705	-0.0898535	0	9.12705	-0.0898535	0	8.65805	-0.16596	0	8.81736	-0.139656	-0.223683	6.96881	-0.479091
Patient[T.Pat_208]	Pat_208	Pat_208_C4	C4	Cluster_4	-0.883	1.164	0.334	0.409667	0	25.7003	0.216371	0	25.7003	0.216371	0	25.9312	0.229276	0	24.9084	0.17122	0.153032	28.7536	0.378331
Patient[T.Pat_198]	Pat_198	Pat_198_C4	C4	Cluster_4	-0.782	0.763	0.258	0.4094	0	20.7852	-0.0898535	0	20.7852	-0.0898535	0	19.7172	-0.16596	0	20.08	-0.139656	0.0233762	20.3179	-0.122659
Patient[T.Pat_1585]	Pat_1585	Pat_1585_C6	C6	Cluster_6	-0.676	1.109	0.305	0.407867	0	19.2633	-0.351043	0	19.2633	-0.351043	0	19.2633	-0.351043	0	19.6147	-0.324963	0	19.5022	-0.333258
Patient[T.Pat_309]	Pat_309	Pat_309_C6	C6	Cluster_6	-0.974	1.354	0.384	0.405	0	16.2269	-0.598512	0	15.6622	-0.649605	0	15.6622	-0.649605	0	15.6075	-0.654659	0	15.8338	-0.633884
Patient[T.Pat_453]	Pat_453	Pat_453_C7	C7	Cluster_7	-1.776	0.463	0.495	0.405	0	6.42674	-0.595915	0	7.59087	-0.355738	0	7.59087	-0.355738	0	7.59087	-0.355738	0	7.45613	-0.381575
Patient[T.Pat_272]	Pat_272	Pat_272_C1	C1	Cluster_1	-0.916	0.425	0.239	0.4024	0	86.7929	0	0	86.7929	0	0	86.7929	0	0	87.7257	0.0154235	0	107.588	0.309868
Patient[T.Pat_208]	Pat_208	Pat_208_C1	C1	Cluster_1	-1.079	0.664	0.293	0.385267	0	100.837	0.216371	0	100.837	0.216371	0	101.743	0.229276	0	97.7297	0.17122	0	96.8082	0.157553
Patient[T.Pat_1585]	Pat_1585	Pat_1585_C0	C0	Cluster_0	-0.904	0.351	0.244	0.373133	0	144.344	-0.351043	0	144.344	-0.351043	0	144.344	-0.351043	0	146.977	-0.324963	0	146.135	-0.333258
Patient[T.Pat_726]	Pat_726	Pat_726_C4	C4	Cluster_4	-0.854	1.452	0.4	0.3712	0	15.7187	-0.492929	0	15.7187	-0.492929	0	15.0489	-0.555756	0	15.1886	-0.542424	0	14.9783	-0.562536
Patient[T.Pat_1401]	Pat_1401	Pat_1401_C1	C1	Cluster_1	-0.635	0.683	0.196	0.364733	0	70.3866	-0.302276	0	70.3866	-0.302276	0	70.3866	-0.302276	0	63.222	-0.457151	0	49.455	-0.81146
Patient[T.Pat_198]	Pat_198	Pat_198_C1	C1	Cluster_1	-0.548	0.41	0.146	0.3556	0	81.5522	-0.0898535	0	81.5522	-0.0898535	0	77.3615	-0.16596	0	78.785	-0.139656	0	77.8768	-0.156384
Patient[T.Pat_1875]	Pat_1875	Pat_1875_C1	C1	Cluster_1	-0.908	0.821	0.267	0.355333	0	60.1517	-0.528971	0	60.1517	-0.528971	0	60.7285	-0.515203	0	60.7285	-0.515203	0	57.3344	-0.598176
Patient[T.Pat_208]	Pat_208	Pat_208_C2	C2	Cluster_2	-1.325	1.227	0.372	0.327267	0	13.3632	0.216371	0	13.3632	0.216371	0	13.4832	0.229276	0	12.9514	0.17122	0	12.8293	0.157553
Patient[T.Pat_726]	Pat_726	Pat_726_C8	C8	Cluster_8	-1.835	0.467	0.487	0.318267	0	2.68546	-0.492929	0	2.68546	-0.492929	0	2.57102	-0.555756	0	2.59489	-0.542424	0	2.55897	-0.562536
Patient[T.Pat_309]	Pat_309	Pat_309_C2	C2	Cluster_2	-1.602	1.061	0.379	0.313267	0	7.59635	-0.598512	0	7.33203	-0.649605	0	7.33203	-0.649605	0	7.30639	-0.654659	0	7.41237	-0.633884
Patient[T.Pat_726]	Pat_726	Pat_726_C7	C7	Cluster_7	-1.657	0.593	0.429	0.311533	0	6.90228	-0.492929	0	6.90228	-0.492929	0	6.60815	-0.555756	0	6.6695	-0.542424	0	6.57717	-0.562536
Patient[T.Pat_1401]	Pat_1401	Pat_1401_C8	C8	Cluster_8	-1.597	0.908	0.363	0.310133	0	3.06486	-0.302276	0	3.06486	-0.302276	0	3.06486	-0.302276	0	2.75289	-0.457151	0	2.15343	-0.81146
Patient[T.Pat_453]	Pat_453	Pat_453_C8	C8	Cluster_8	-2.184	1.184	0.482	0.3036	0	2.50044	-0.595915	0	2.95337	-0.355738	0	2.95337	-0.355738	0	2.95337	-0.355738	0	2.90095	-0.381575
Patient[T.Pat_453]	Pat_453	Pat_453_C5	C5	Cluster_5	-0.661	1.121	0.306	0.297667	0	34.8296	-0.595915	0	41.1386	-0.355738	0	41.1386	-0.355738	0	41.1386	-0.355738	0	40.4084	-0.381575
Patient[T.Pat_1335]	Pat_1335	Pat_1335_C0	C0	Cluster_0	-0.258	0.906	0.21	0.289	0	199.832	0.118235	0	199.832	0.118235	0	183.633	-0.00372878	0	183.633	-0.00372878	0	184.872	0.005971
Patient[T.Pat_208]	Pat_208	Pat_208_C8	C8	Cluster_8	-1.564	0.984	0.366	0.2846	0	4.39076	0.216371	0	4.39076	0.216371	0	4.43021	0.229276	0	4.25547	0.17122	0	4.21535	0.157553
Patient[T.Pat_208]	Pat_208	Pat_208_C0	C0	Cluster_0	-0.203	1.006	0.253	0.283867	0	213.898	0.216371	0	213.898	0.216371	0	215.82	0.229276	0	207.308	0.17122	0	205.353	0.157553
Patient[T.Pat_1875]	Pat_1875	Pat_1875_C8	C8	Cluster_8	-1.542	1.333	0.373	0.2702	0	2.6192	-0.528971	0	2.6192	-0.528971	0	2.64432	-0.515203	0	2.64432	-0.515203	0	2.49653	-0.598176
Patient[T.Pat_726]	Pat_726	Pat_726_C0	C0	Cluster_0	-1.231	0.195	0.291	0.267	0	130.824	-0.492929	0	130.824	-0.492929	0	125.249	-0.555756	0	126.412	-0.542424	0	124.662	-0.562536
Patient[T.Pat_309]	Pat_309	Pat_309_C0	C0	Cluster_0	-1.224	0.31	0.287	0.265867	0	121.592	-0.598512	0	117.361	-0.649605	0	117.361	-0.649605	0	116.95	-0.654659	0	118.647	-0.633884
Patient[T.Pat_309]	Pat_309	Pat_309_C1	C1	Cluster_1	-1.157	0.849	0.269	0.264667	0	57.321	-0.598512	0	55.3265	-0.649605	0	55.3265	-0.649605	0	55.133	-0.654659	0	55.9327	-0.633884
Patient[T.Pat_1875]	Pat_1875	Pat_1875_C6	C6	Cluster_6	-2.066	0.537	0.489	0.262467	0	17.0282	-0.528971	0	17.0282	-0.528971	0	17.1915	-0.515203	0	17.1915	-0.515203	0	16.2306	-0.598176
Patient[T.Pat_208]	Pat_208	Pat_208_C3	C3	Cluster_3	-1.527	0.738	0.232	0.181067	0	25.4955	0.216371	0	25.4955	0.216371	0	25.7246	0.229276	0	24.7099	0.17122	0	24.4769	0.157553
Patient[T.Pat_1335]	Pat_1335	Pat_1335_C9	C9	Cluster_9	0	0	0	0	0	11.4442	0.118235	0	11.4442	0.118235	0	10.5164	-0.00372878	0	10.5164	-0.00372878	0	10.5874	0.005971
Patient[T.Pat_1401]	Pat_1401	Pat_1401_C9	C9	Cluster_9	0	0	0	0	0	8.55061	-0.302276	0	8.55061	-0.302276	0	8.55061	-0.302276	0	7.68025	-0.457151	0	6.00783	-0.81146
Patient[T.Pat_1585]	Pat_1585	Pat_1585_C9	C9	Cluster_9	0	0	0	0	0	8.26641	-0.351043	0	8.26641	-0.351043	0	8.26641	-0.351043	0	8.4172	-0.324963	0	8.36894	-0.333258
Patient[T.Pat_1875]	Pat_1875	Pat_1875_C9	C9	Cluster_9	0	0	0	0	0	7.30727	-0.528971	0	7.30727	-0.528971	0	7.37734	-0.515203	0	7.37734	-0.515203	0	6.96502	-0.598176
Patient[T.Pat_198]	Pat_198	Pat_198_C9	C9	Cluster_9	0	0	0	0	0	9.90701	-0.0898535	0	9.90701	-0.0898535	0	9.39793	-0.16596	0	9.57086	-0.139656	0	9.46052	-0.156384
Patient[T.Pat_208]	Pat_208	Pat_208_C9	C9	Cluster_9	0	0	0	0	0	12.2497	0.216371	0	12.2497	0.216371	0	12.3598	0.229276	0	11.8723	0.17122	0	11.7603	0.157553
Patient[T.Pat_267]	Pat_267	Pat_267_C9	C9	Cluster_9	0	0	0	0	0	10.5437	0	0	10.1216	-0.0589371	0	11.7379	0.154794	0	10.9169	0.0501867	0	11.0748	0.0708988
Patient[T.Pat_272]	Pat_272	Pat_272_C9	C9	Cluster_9	0	0	0	0	0	10.5437	0	0	10.5437	0	0	10.5437	0	0	10.657	0.0154235	0	13.0699	0.309868
Patient[T.Pat_309]	Pat_309	Pat_309_C9	C9	Cluster_9	0	0	0	0	0	6.9634	-0.598512	0	6.7211	-0.649605	0	6.7211	-0.649605	0	6.6976	-0.654659	0	6.79475	-0.633884
Patient[T.Pat_453]	Pat_453	Pat_453_C9	C9	Cluster_9	0	0	0	0	0	6.97594	-0.595915	0	8.23955	-0.355738	0	8.23955	-0.355738	0	8.23955	-0.355738	0	8.0933	-0.381575
Patient[T.Pat_726]	Pat_726	Pat_726_C9	C9	Cluster_9	0	0	0	0	0	7.49212	-0.492929	0	7.49212	-0.492929	0	7.17286	-0.555756	0	7.23945	-0.542424	0	7.13923	-0.562536

## Sheet: Effects - PatientsXTime
Covariate	Covariate		Cell Type	Cell Type	HDI 3%	HDI 97%	SD	Inclusion probability	Final Parameter @ FDR 0.05	Expected Sample @ FDR 0.05	log2-fold change @ FDR 0.05	Final Parameter @ FDR 0.1	Expected Sample @ FDR 0.1	log2-fold change @ FDR 0.1	Final Parameter @ FDR 0.2	Expected Sample @ FDR 0.2	log2-fold change @ FDR 0.2	Final Parameter @ FDR 0.3	Expected Sample @ FDR 0.3	log2-fold change @ FDR 0.3	Final Parameter @ FDR 0.4	Expected Sample @ FDR 0.4	log2-fold change @ FDR 0.4
Patient[T.Pat_272]:Time[T.Late]	Pat_272:Late	Pat_272:Late_C8	C8	Cluster_8	4.903	7.675	0.726	1	6.26358	382.006	6.65935	6.26358	382.006	6.65935	6.26358	382.006	6.65935	6.26358	382.006	6.65935	6.26358	385.448	6.67229
Patient[T.Pat_267]:Time[T.Late]	Pat_267:Late	Pat_267:Late_C3	C3	Cluster_3	-0.152	2.303	0.788	0.769333	0	21.9447	0	1.04417	57.0216	1.37764	1.04417	57.3735	1.38651	1.04417	60.2214	1.45641	1.04417	57.1437	1.38072
Patient[T.Pat_1585]:Time[T.Late]	Pat_1585:Late	Pat_1585:Late_C8	C8	Cluster_8	-1.16	5.176	1.456	0.6634	0	3.77925	0	0	3.77925	0	0.978096	9.63642	1.3504	0.978096	9.29677	1.29863	0.978096	9.24073	1.28991
Patient[T.Pat_726]:Time[T.Late]	Pat_726:Late	Pat_726:Late_C4	C4	Cluster_4	-1.329	5.654	1.552	0.6486	0	22.1209	0	0	22.1299	0.000581933	0	22.1299	0.000581933	0.963741	49.1212	1.15093	0.963741	32.6143	0.560091
Patient[T.Pat_453]:Time[T.Late]	Pat_453:Late	Pat_453:Late_C10	C10	Cluster_10	-4.574	6.688	1.95	0.565667	0	4.99044	0	0	4.99044	0	0	5.05697	0.0191058	0.81274	11.2947	1.17841	0.81274	11.2914	1.17798
Patient[T.Pat_1875]:Time[T.Late]	Pat_1875:Late	Pat_1875:Late_C7	C7	Cluster_7	-2.645	5.407	1.67	0.547333	0	9.71358	0	0	9.71358	0	0	8.62137	-0.172085	0.77063	19.0035	0.968194	0.77063	23.2559	1.25952
Patient[T.Pat_1875]:Time[T.Late]	Pat_1875:Late	Pat_1875:Late_C5	C5	Cluster_5	-1.918	6.128	1.815	0.704067	0	52.6425	0	0	52.6425	0	0.713597	95.3774	0.857419	0.713597	97.28	0.885914	0.713597	119.048	1.17724
Patient[T.Pat_726]:Time[T.Late]	Pat_726:Late	Pat_726:Late_C10	C10	Cluster_10	-2.499	8.09	2.03	0.600533	0	4.99044	0	0	4.99246	0.000581933	0	4.99246	0.000581933	0.679568	8.34045	0.740957	0.679568	5.53769	0.150116
Patient[T.Pat_1401]:Time[T.Late]	Pat_1401:Late	Pat_1401:Late_C8	C8	Cluster_8	-1.692	4.369	1.572	0.704533	0	3.77925	0	0	3.77925	0	0.62796	7.11961	0.9137	0.62796	7.11178	0.912112	0.62796	6.58707	0.801538
Patient[T.Pat_1335]:Time[T.Late]	Pat_1335:Late	Pat_1335:Late_C6	C6	Cluster_6	-1.613	4.87	1.33	0.6982	0	24.57	0	0	24.5675	-0.000147043	0.593919	39.4725	0.683954	0.593919	40.06	0.705266	0.593919	40.7551	0.730083
Patient[T.Pat_267]:Time[T.Late]	Pat_267:Late	Pat_267:Late_C1	C1	Cluster_1	-0.407	1.667	0.517	0.562133	0	86.7929	0	0	79.3813	-0.128778	0	79.8712	-0.119901	0.563715	147.315	0.763261	0.563715	139.787	0.687578
Patient[T.Pat_267]:Time[T.Late]	Pat_267:Late	Pat_267:Late_C8	C8	Cluster_8	-1.055	2.291	0.783	0.682733	0	3.77925	0	0	3.45652	-0.128778	0.469217	5.56019	0.557036	0.469217	5.83619	0.626929	0.469217	5.53792	0.551246
Patient[T.Pat_1335]:Time[T.Late]	Pat_1335:Late	Pat_1335:Late_C3	C3	Cluster_3	-1.451	2.578	0.779	0.589733	0	21.9447	0	0	21.9424	-0.000147043	0	19.4663	-0.17289	0.382865	28.9718	0.40078	0.382865	29.4745	0.425598
Patient[T.Pat_198]:Time[T.Late]	Pat_198:Late	Pat_198:Late_C6	C6	Cluster_6	-0.462	1.555	0.506	0.756667	0	24.57	0	0.37482	34.843	0.503973	0.37482	34.843	0.503973	0.37482	35.0422	0.512199	0.37482	30.2213	0.298672
Patient[T.Pat_267]:Time[T.Late]	Pat_267:Late	Pat_267:Late_C6	C6	Cluster_6	-1.075	1.774	0.583	0.595133	0	24.57	0	0	22.4718	-0.128778	0	22.6105	-0.119901	0.371366	34.4059	0.48576	0.371366	32.6475	0.410077
Patient[T.Pat_1335]:Time[T.Late]	Pat_1335:Late	Pat_1335:Late_C1	C1	Cluster_1	-1.404	2.767	0.924	0.6784	0	86.7929	0	0	86.784	-0.000147043	0.352345	109.512	0.335437	0.352345	111.142	0.356749	0.352345	113.07	0.381567
Patient[T.Pat_726]:Time[T.Late]	Pat_726:Late	Pat_726:Late_C1	C1	Cluster_1	-3.547	7.178	1.91	0.595533	0	86.7929	0	0	86.8279	0.000581933	0	86.8279	0.000581933	0.335151	102.791	0.244068	0.335151	68.2488	-0.346773
Patient[T.Pat_453]:Time[T.Late]	Pat_453:Late	Pat_453:Late_C2	C2	Cluster_2	-4.666	3.429	1.536	0.7092	0	11.502	0	0	11.502	0	0.305136	15.8141	0.459324	0.305136	15.6697	0.446088	0.305136	15.6651	0.445663
Patient[T.Pat_208]:Time[T.Late]	Pat_208:Late	Pat_208:Late_C0	C0	Cluster_0	-0.288	0.957	0.299	0.553333	0	184.108	0	0	184.108	0	0	184.108	0	0.267909	220.056	0.257313	0.267909	220.364	0.259335
Patient[T.Pat_1335]:Time[T.Late]	Pat_1335:Late	Pat_1335:Late_C4	C4	Cluster_4	-1.091	2.295	0.658	0.5332	0	22.1209	0	0	22.1187	-0.000147043	0	19.6227	-0.17289	0.201361	24.357	0.138924	0.201361	24.7796	0.163742
Patient[T.Pat_1585]:Time[T.Late]	Pat_1585:Late	Pat_1585:Late_C1	C1	Cluster_1	-1.754	2.23	0.803	0.726267	0	86.7929	0	0	86.7929	0	0.144765	96.1797	0.148156	0.144765	92.7897	0.096388	0.144765	92.2303	0.0876648
Patient[T.Pat_208]:Time[T.Late]	Pat_208:Late	Pat_208:Late_C7	C7	Cluster_7	-0.762	1.162	0.357	0.5646	0	9.71358	0	0	9.71358	0	0	9.71358	0	0.13595	10.1749	0.0669358	0.13595	10.1891	0.0689578
Patient[T.Pat_1585]:Time[T.Late]	Pat_1585:Late	Pat_1585:Late_C3	C3	Cluster_3	-2.991	2.957	0.992	0.557133	0	21.9447	0	0	21.9447	0	0	21.0406	-0.0606956	0.124229	22.984	0.0667616	0.124229	22.8455	0.0580384
Patient[T.Pat_1401]:Time[T.Late]	Pat_1401:Late	Pat_1401:Late_C10	C10	Cluster_10	-3.344	2.329	1.039	0.5886	0	4.99044	0	0	4.99044	0	0	5.0173	0.00774481	0.0907253	5.48775	0.137046	0.0907253	5.08286	0.0264717
Patient[T.Pat_726]:Time[T.Late]	Pat_726:Late	Pat_726:Late_C5	C5	Cluster_5	-2.658	4.679	1.366	0.5474	0	52.6425	0	0	52.6638	0.000581933	0	52.6638	0.000581933	0.0895471	48.769	-0.110264	0.0895471	32.3805	-0.701105
Patient[T.Pat_1585]:Time[T.Late]	Pat_1585:Late	Pat_1585:Late_C0	C0	Cluster_0	-1.824	2.725	0.847	0.629	0	184.108	0	0	184.108	0	0	176.523	-0.0606956	0.0734089	183.274	-0.00655651	0.0734089	182.169	-0.0152797
Patient[T.Pat_1875]:Time[T.Late]	Pat_1875:Late	Pat_1875:Late_C2	C2	Cluster_2	-2.701	3.831	1.356	0.5646	0	11.502	0	0	11.502	0	0	10.2087	-0.172085	0.0731487	11.2026	-0.0380586	0.0731487	13.7093	0.25327
Patient[T.Pat_1335]:Time[T.Late]	Pat_1335:Late	Pat_1335:Late_C10	C10	Cluster_10	-3.638	2.693	1.326	0.766733	0	4.99044	0	0.00879906	5.03403	0.0125473	0.00879906	4.46597	-0.160195	0.00879906	4.53243	-0.138883	0.00879906	4.61107	-0.114066
Patient[T.Pat_1401]:Time[T.Late]	Pat_1401:Late	Pat_1401:Late_C2	C2	Cluster_2	-1.48	6.108	1.588	0.419133	0	11.502	0	0	11.502	0	0	11.564	0.00774481	0	11.5512	0.00615703	1.16881	34.431	1.58182
Patient[T.Pat_726]:Time[T.Late]	Pat_726:Late	Pat_726:Late_C0	C0	Cluster_0	-2.075	5.478	1.429	0.4724	0	184.108	0	0	184.183	0.000581933	0	184.183	0.000581933	0	155.952	-0.239453	0.787467	227.574	0.305781
Patient[T.Pat_726]:Time[T.Late]	Pat_726:Late	Pat_726:Late_C3	C3	Cluster_3	-1.566	4.199	1.253	0.4872	0	21.9447	0	0	21.9535	0.000581933	0	21.9535	0.000581933	0	18.5886	-0.239453	0.639862	23.4032	0.0928321
Patient[T.Pat_726]:Time[T.Late]	Pat_726:Late	Pat_726:Late_C6	C6	Cluster_6	-1.599	6.059	1.357	0.436867	0	24.57	0	0	24.5799	0.000581933	0	24.5799	0.000581933	0	20.8124	-0.239453	0.611497	25.4701	0.0519098
Patient[T.Pat_267]:Time[T.Late]	Pat_267:Late	Pat_267:Late_C5	C5	Cluster_5	-0.724	2.417	0.606	0.454267	0	52.6425	0	0	48.1472	-0.128778	0	48.4443	-0.119901	0	50.849	-0.0500086	0.462812	76.6473	0.542005
Patient[T.Pat_309]:Time[T.Late]	Pat_309:Late	Pat_309:Late_C3	C3	Cluster_3	-0.35	1.492	0.416	0.5254	0	21.9447	0	0	22.003	0.00383097	0	22.003	0.00383097	0	22.0971	0.00998542	0.355519	33.2786	0.600723
Patient[T.Pat_1875]:Time[T.Late]	Pat_1875:Late	Pat_1875:Late_C8	C8	Cluster_8	-2.64	3.467	0.939	0.4198	0	3.77925	0	0	3.77925	0	0	3.3543	-0.172085	0	3.42121	-0.14359	0.343335	5.90184	0.643066
Patient[T.Pat_309]:Time[T.Late]	Pat_309:Late	Pat_309:Late_C7	C7	Cluster_7	-0.771	1.805	0.488	0.475867	0	9.71358	0	0	9.7394	0.00383097	0	9.7394	0.00383097	0	9.78104	0.00998542	0.309615	14.0695	0.534497
Patient[T.Pat_198]:Time[T.Late]	Pat_198:Late	Pat_198:Late_C0	C0	Cluster_0	-0.252	1.215	0.313	0.467867	0	184.108	0	0	179.474	-0.0367782	0	179.474	-0.0367782	0	180.501	-0.0285523	0.304331	211.042	0.196977
Patient[T.Pat_1585]:Time[T.Late]	Pat_1585:Late	Pat_1585:Late_C7	C7	Cluster_7	-1.345	2.712	0.736	0.453267	0	9.71358	0	0	9.71358	0	0	9.31339	-0.0606956	0	8.98513	-0.112463	0.256244	11.5394	0.248495
Patient[T.Pat_1401]:Time[T.Late]	Pat_1401:Late	Pat_1401:Late_C6	C6	Cluster_6	-1.997	3.934	0.962	0.431333	0	24.57	0	0	24.57	0	0	24.7022	0.00774481	0	24.675	0.00615703	0.231384	28.8045	0.229399
Patient[T.Pat_453]:Time[T.Late]	Pat_453:Late	Pat_453:Late_C0	C0	Cluster_0	-0.859	3.671	0.76	0.418933	0	184.108	0	0	184.108	0	0	186.563	0.0191058	0	184.859	0.00587038	0.20302	226.404	0.298342
Patient[T.Pat_267]:Time[T.Late]	Pat_267:Late	Pat_267:Late_C10	C10	Cluster_10	-1.166	1.593	0.475	0.426	0	4.99044	0	0	4.56429	-0.128778	0	4.59246	-0.119901	0	4.82042	-0.0500086	0.201327	5.59419	0.164762
Patient[T.Pat_198]:Time[T.Late]	Pat_198:Late	Pat_198:Late_C10	C10	Cluster_10	-0.635	1.088	0.307	0.418267	0	4.99044	0	0	4.86483	-0.0367782	0	4.86483	-0.0367782	0	4.89265	-0.0285523	0.143167	4.86903	-0.0355335
Patient[T.Pat_1875]:Time[T.Late]	Pat_1875:Late	Pat_1875:Late_C6	C6	Cluster_6	-3.798	3.452	1.443	0.5272	0	24.57	0	0	24.57	0	0	21.8073	-0.172085	0	22.2423	-0.14359	0.136261	31.1929	0.344322
Patient[T.Pat_198]:Time[T.Late]	Pat_198:Late	Pat_198:Late_C1	C1	Cluster_1	-0.303	0.63	0.178	0.448533	0	86.7929	0	0	84.6083	-0.0367782	0	84.6083	-0.0367782	0	85.0921	-0.0285523	0.124181	83.0887	-0.0629244
Patient[T.Pat_198]:Time[T.Late]	Pat_198:Late	Pat_198:Late_C2	C2	Cluster_2	-0.539	0.869	0.258	0.470533	0	11.502	0	0	11.2125	-0.0367782	0	11.2125	-0.0367782	0	11.2766	-0.0285523	0.114123	10.901	-0.0774354
Patient[T.Pat_1401]:Time[T.Late]	Pat_1401:Late	Pat_1401:Late_C5	C5	Cluster_5	-4.744	3.326	1.306	0.510133	0	52.6425	0	0	52.6425	0	0	52.9259	0.00774481	0	52.8677	0.00615703	0.102487	54.2517	0.0434397
Patient[T.Pat_309]:Time[T.Late]	Pat_309:Late	Pat_309:Late_C1	C1	Cluster_1	-0.555	0.724	0.251	0.515933	0	86.7929	0	0	87.0237	0.00383097	0	87.0237	0.00383097	0	87.3957	0.00998542	0.0913984	101.068	0.219678
Patient[T.Pat_1335]:Time[T.Late]	Pat_1335:Late	Pat_1335:Late_C9	C9	Cluster_9	0	0	0	0	0	10.5437	0	0	10.5426	-0.000147043	0	9.3529	-0.17289	0	9.49209	-0.151578	0	9.65679	-0.12676
Patient[T.Pat_1401]:Time[T.Late]	Pat_1401:Late	Pat_1401:Late_C1	C1	Cluster_1	-1.246	4.592	1.005	0.404867	0	86.7929	0	0	86.7929	0	0	87.2601	0.00774481	0	87.1641	0.00615703	0	80.7331	-0.104417
Patient[T.Pat_1401]:Time[T.Late]	Pat_1401:Late	Pat_1401:Late_C0	C0	Cluster_0	-1.865	4.797	1.049	0.3822	0	184.108	0	0	184.108	0	0	185.099	0.00774481	0	184.896	0.00615703	0	171.254	-0.104417
Patient[T.Pat_1401]:Time[T.Late]	Pat_1401:Late	Pat_1401:Late_C9	C9	Cluster_9	0	0	0	0	0	10.5437	0	0	10.5437	0	0	10.6004	0.00774481	0	10.5888	0.00615703	0	9.80751	-0.104417
Patient[T.Pat_1585]:Time[T.Late]	Pat_1585:Late	Pat_1585:Late_C2	C2	Cluster_2	-1.86	2.141	0.78	0.370533	0	11.502	0	0	11.502	0	0	11.0282	-0.0606956	0	10.6395	-0.112463	0	10.5753	-0.121186
Patient[T.Pat_1585]:Time[T.Late]	Pat_1585:Late	Pat_1585:Late_C6	C6	Cluster_6	-3.003	1.262	0.615	0.360867	0	24.57	0	0	24.57	0	0	23.5577	-0.0606956	0	22.7274	-0.112463	0	22.5904	-0.121186
Patient[T.Pat_1585]:Time[T.Late]	Pat_1585:Late	Pat_1585:Late_C5	C5	Cluster_5	-4.007	1.221	0.898	0.359333	0	52.6425	0	0	52.6425	0	0	50.4738	-0.0606956	0	48.6947	-0.112463	0	48.4012	-0.121186
Patient[T.Pat_1585]:Time[T.Late]	Pat_1585:Late	Pat_1585:Late_C9	C9	Cluster_9	0	0	0	0	0	10.5437	0	0	10.5437	0	0	10.1093	-0.0606956	0	9.75296	-0.112463	0	9.69417	-0.121186
Patient[T.Pat_1875]:Time[T.Late]	Pat_1875:Late	Pat_1875:Late_C4	C4	Cluster_4	-5.326	2.426	1.063	0.363667	0	22.1209	0	0	22.1209	0	0	19.6336	-0.172085	0	20.0253	-0.14359	0	24.5063	0.147739
Patient[T.Pat_1875]:Time[T.Late]	Pat_1875:Late	Pat_1875:Late_C9	C9	Cluster_9	0	0	0	0	0	10.5437	0	0	10.5437	0	0	9.35812	-0.172085	0	9.54479	-0.14359	0	11.6806	0.147739
Patient[T.Pat_198]:Time[T.Late]	Pat_198:Late	Pat_198:Late_C4	C4	Cluster_4	-0.46	0.672	0.162	0.3118	0	22.1209	0	0	21.5641	-0.0367782	0	21.5641	-0.0367782	0	21.6874	-0.0285523	0	18.7038	-0.24208
Patient[T.Pat_198]:Time[T.Late]	Pat_198:Late	Pat_198:Late_C9	C9	Cluster_9	0	0	0	0	0	10.5437	0	0	10.2783	-0.0367782	0	10.2783	-0.0367782	0	10.337	-0.0285523	0	8.91493	-0.24208
Patient[T.Pat_208]:Time[T.Late]	Pat_208:Late	Pat_208:Late_C4	C4	Cluster_4	-0.568	0.705	0.207	0.393667	0	22.1209	0	0	22.1209	0	0	22.1209	0	0	20.226	-0.129198	0	20.2544	-0.127176
Patient[T.Pat_208]:Time[T.Late]	Pat_208:Late	Pat_208:Late_C3	C3	Cluster_3	-0.508	0.374	0.148	0.381133	0	21.9447	0	0	21.9447	0	0	21.9447	0	0	20.0649	-0.129198	0	20.093	-0.127176
Patient[T.Pat_208]:Time[T.Late]	Pat_208:Late	Pat_208:Late_C2	C2	Cluster_2	-0.577	0.852	0.274	0.348867	0	11.502	0	0	11.502	0	0	11.502	0	0	10.5168	-0.129198	0	10.5315	-0.127176
Patient[T.Pat_208]:Time[T.Late]	Pat_208:Late	Pat_208:Late_C9	C9	Cluster_9	0	0	0	0	0	10.5437	0	0	10.5437	0	0	10.5437	0	0	9.64048	-0.129198	0	9.654	-0.127176
Patient[T.Pat_267]:Time[T.Late]	Pat_267:Late	Pat_267:Late_C9	C9	Cluster_9	0	0	0	0	0	10.5437	0	0	9.64329	-0.128778	0	9.70281	-0.119901	0	10.1844	-0.0500086	0	9.66395	-0.125691
Patient[T.Pat_272]:Time[T.Late]	Pat_272:Late	Pat_272:Late_C6	C6	Cluster_6	-2.772	1.506	0.78	0.3904	0	4.72966	-2.37709	0	4.72966	-2.37709	0	4.72966	-2.37709	0	4.72966	-2.37709	0	4.77227	-2.36415
Patient[T.Pat_272]:Time[T.Late]	Pat_272:Late	Pat_272:Late_C10	C10	Cluster_10	-1.395	3.514	0.882	0.390133	0	0.960648	-2.37709	0	0.960648	-2.37709	0	0.960648	-2.37709	0	0.960648	-2.37709	0	0.969304	-2.36415
Patient[T.Pat_272]:Time[T.Late]	Pat_272:Late	Pat_272:Late_C1	C1	Cluster_1	-2.478	0.683	0.632	0.381267	0	16.7074	-2.37709	0	16.7074	-2.37709	0	16.7074	-2.37709	0	16.7074	-2.37709	0	16.858	-2.36415
Patient[T.Pat_272]:Time[T.Late]	Pat_272:Late	Pat_272:Late_C5	C5	Cluster_5	-1.439	2.339	0.562	0.354133	0	10.1336	-2.37709	0	10.1336	-2.37709	0	10.1336	-2.37709	0	10.1336	-2.37709	0	10.2249	-2.36415
Patient[T.Pat_272]:Time[T.Late]	Pat_272:Late	Pat_272:Late_C7	C7	Cluster_7	-3.146	2.368	0.789	0.3316	0	1.86984	-2.37709	0	1.86984	-2.37709	0	1.86984	-2.37709	0	1.86984	-2.37709	0	1.88669	-2.36415
Patient[T.Pat_272]:Time[T.Late]	Pat_272:Late	Pat_272:Late_C2	C2	Cluster_2	-2.003	2.028	0.567	0.3144	0	2.21411	-2.37709	0	2.21411	-2.37709	0	2.21411	-2.37709	0	2.21411	-2.37709	0	2.23407	-2.36415
Patient[T.Pat_272]:Time[T.Late]	Pat_272:Late	Pat_272:Late_C9	C9	Cluster_9	0	0	0	0	0	2.02963	-2.37709	0	2.02963	-2.37709	0	2.02963	-2.37709	0	2.02963	-2.37709	0	2.04792	-2.36415
Patient[T.Pat_309]:Time[T.Late]	Pat_309:Late	Pat_309:Late_C2	C2	Cluster_2	-1.719	0.931	0.46	0.4036	0	11.502	0	0	11.5326	0.00383097	0	11.5326	0.00383097	0	11.5819	0.00998542	0	12.2239	0.0878177
Patient[T.Pat_309]:Time[T.Late]	Pat_309:Late	Pat_309:Late_C5	C5	Cluster_5	-1.744	0.321	0.425	0.377067	0	52.6425	0	0	52.7825	0.00383097	0	52.7825	0.00383097	0	53.0082	0.00998542	0	55.9465	0.0878177
Patient[T.Pat_309]:Time[T.Late]	Pat_309:Late	Pat_309:Late_C4	C4	Cluster_4	-0.552	2.263	0.566	0.3454	0	22.1209	0	0	22.1798	0.00383097	0	22.1798	0.00383097	0	22.2746	0.00998542	0	23.5093	0.0878177
Patient[T.Pat_309]:Time[T.Late]	Pat_309:Late	Pat_309:Late_C9	C9	Cluster_9	0	0	0	0	0	10.5437	0	0	10.5717	0.00383097	0	10.5717	0.00383097	0	10.6169	0.00998542	0	11.2054	0.0878177
Patient[T.Pat_453]:Time[T.Late]	Pat_453:Late	Pat_453:Late_C5	C5	Cluster_5	-2.152	3.602	0.918	0.3822	0	52.6425	0	0	52.6425	0	0	53.3443	0.0191058	0	52.8572	0.00587038	0	52.8416	0.00544549
Patient[T.Pat_453]:Time[T.Late]	Pat_453:Late	Pat_453:Late_C9	C9	Cluster_9	0	0	0	0	0	10.5437	0	0	10.5437	0	0	10.6842	0.0191058	0	10.5866	0.00587038	0	10.5835	0.00544549
Patient[T.Pat_726]:Time[T.Late]	Pat_726:Late	Pat_726:Late_C9	C9	Cluster_9	0	0	0	0	0	10.5437	0	0	10.5479	0.000581933	0	10.5479	0.000581933	0	8.93118	-0.239453	0	5.92991	-0.830294
Patient[T.Pat_453]:Time[T.Late]	Pat_453:Late	Pat_453:Late_C4	C4	Cluster_4	-5.409	2.663	1.308	0.453067	0	22.1209	0	0	22.1209	0	0	22.4158	0.0191058	0	22.2111	0.00587038	-0.00047368	22.1941	0.00476211
Patient[T.Pat_267]:Time[T.Late]	Pat_267:Late	Pat_267:Late_C7	C7	Cluster_7	-0.905	1.064	0.345	0.5178	0	9.71358	0	0	8.88409	-0.128778	0	8.93893	-0.119901	0	9.38264	-0.0500086	-0.0197292	8.72919	-0.154154
Patient[T.Pat_1335]:Time[T.Late]	Pat_1335:Late	Pat_1335:Late_C0	C0	Cluster_0	-1.853	1.699	0.642	0.4798	0	184.108	0	0	184.09	-0.000147043	0	163.316	-0.17289	0	165.746	-0.151578	-0.0319392	163.322	-0.172839
Patient[T.Pat_309]:Time[T.Late]	Pat_309:Late	Pat_309:Late_C10	C10	Cluster_10	-1.1	1.23	0.546	0.428	0	4.99044	0	0	5.00371	0.00383097	0	5.00371	0.00383097	0	5.0251	0.00998542	-0.125224	4.6794	-0.092843
Patient[T.Pat_208]:Time[T.Late]	Pat_208:Late	Pat_208:Late_C10	C10	Cluster_10	-1.066	0.612	0.292	0.4446	0	4.99044	0	0	4.99044	0	0	4.99044	0	0	4.56296	-0.129198	-0.142511	3.96245	-0.332776
Patient[T.Pat_1335]:Time[T.Late]	Pat_1335:Late	Pat_1335:Late_C2	C2	Cluster_2	-3.619	2.304	0.967	0.453467	0	11.502	0	0	11.5009	-0.000147043	0	10.203	-0.17289	0	10.3549	-0.151578	-0.235134	8.3272	-0.465987
Patient[T.Pat_309]:Time[T.Late]	Pat_309:Late	Pat_309:Late_C0	C0	Cluster_0	-1.149	0.266	0.318	0.527867	0	184.108	0	0	184.598	0.00383097	0	184.598	0.00383097	0	185.387	0.00998542	-0.267286	149.771	-0.297795
Patient[T.Pat_726]:Time[T.Late]	Pat_726:Late	Pat_726:Late_C7	C7	Cluster_7	-5.587	6.218	1.935	0.427333	0	9.71358	0	0	9.7175	0.000581933	0	9.7175	0.000581933	0	8.22805	-0.239453	-0.279585	4.13061	-1.23365
Patient[T.Pat_198]:Time[T.Late]	Pat_198:Late	Pat_198:Late_C7	C7	Cluster_7	-1.285	0.503	0.377	0.4286	0	9.71358	0	0	9.46908	-0.0367782	0	9.46908	-0.0367782	0	9.52323	-0.0285523	-0.298181	6.09548	-0.672264
Patient[T.Pat_198]:Time[T.Late]	Pat_198:Late	Pat_198:Late_C3	C3	Cluster_3	-1.318	0.285	0.357	0.493133	0	21.9447	0	0	21.3923	-0.0367782	0	21.3923	-0.0367782	0	21.5146	-0.0285523	-0.333001	13.2995	-0.722499
Patient[T.Pat_453]:Time[T.Late]	Pat_453:Late	Pat_453:Late_C8	C8	Cluster_8	-4.286	2.853	1.177	0.481067	0	3.77925	0	0	3.77925	0	0	3.82963	0.0191058	0	3.79466	0.00587038	-0.402075	2.53761	-0.574626
Patient[T.Pat_1401]:Time[T.Late]	Pat_1401:Late	Pat_1401:Late_C7	C7	Cluster_7	-2.917	1.524	0.899	0.517733	0	9.71358	0	0	9.71358	0	0	9.76586	0.00774481	0	9.75512	0.00615703	-0.410352	5.99422	-0.69643
Patient[T.Pat_267]:Time[T.Late]	Pat_267:Late	Pat_267:Late_C4	C4	Cluster_4	-1.908	1.104	0.63	0.475533	0	22.1209	0	0	20.2319	-0.128778	0	20.3568	-0.119901	0	21.3673	-0.0500086	-0.433247	13.1465	-0.750734
Patient[T.Pat_453]:Time[T.Late]	Pat_453:Late	Pat_453:Late_C1	C1	Cluster_1	-4.588	2.702	1.331	0.451	0	86.7929	0	0	86.7929	0	0	87.9499	0.0191058	0	87.1468	0.00587038	-0.513088	52.1545	-0.734784
Patient[T.Pat_1875]:Time[T.Late]	Pat_1875:Late	Pat_1875:Late_C0	C0	Cluster_0	-3.909	1.163	1.026	0.511867	0	184.108	0	0	184.108	0	0	163.407	-0.172085	0	166.667	-0.14359	-0.538972	118.98	-0.629834
Patient[T.Pat_272]:Time[T.Late]	Pat_272:Late	Pat_272:Late_C3	C3	Cluster_3	-3.123	1.687	0.947	0.500933	0	4.2243	-2.37709	0	4.2243	-2.37709	0	4.2243	-2.37709	0	4.2243	-2.37709	-0.593059	2.35553	-3.21975
Patient[T.Pat_272]:Time[T.Late]	Pat_272:Late	Pat_272:Late_C4	C4	Cluster_4	-2.8	1.481	0.873	0.479	0	4.25823	-2.37709	0	4.25823	-2.37709	0	4.25823	-2.37709	0	4.25823	-2.37709	-0.62301	2.30438	-3.26296
Patient[T.Pat_453]:Time[T.Late]	Pat_453:Late	Pat_453:Late_C7	C7	Cluster_7	-4.944	1.869	1.329	0.523067	0	9.71358	0	0	9.71358	0	0	9.84307	0.0191058	0	9.75318	0.00587038	-0.770627	4.51169	-1.10633
Patient[T.Pat_1875]:Time[T.Late]	Pat_1875:Late	Pat_1875:Late_C3	C3	Cluster_3	-6.482	1.471	1.525	0.5138	0	21.9447	0	0	21.9447	0	0	19.4772	-0.172085	0	19.8657	-0.14359	-0.791804	11.0135	-0.994592
Patient[T.Pat_1875]:Time[T.Late]	Pat_1875:Late	Pat_1875:Late_C10	C10	Cluster_10	-9.326	1.627	2.513	0.5282	0	4.99044	0	0	4.99044	0	0	4.42931	-0.172085	0	4.51767	-0.14359	-1.45329	1.29258	-1.94891
Patient[T.Pat_208]:Time[T.Late]	Pat_208:Late	Pat_208:Late_C8	C8	Cluster_8	-0.676	0.503	0.212	0.5698	0	3.77925	0	0	3.77925	0	0	3.77925	0	-0.0199521	3.38725	-0.157983	-0.0199521	3.392	-0.155961
Patient[T.Pat_1585]:Time[T.Late]	Pat_1585:Late	Pat_1585:Late_C4	C4	Cluster_4	-2.088	2.124	0.904	0.6308	0	22.1209	0	0	22.1209	0	0	21.2096	-0.0606956	-0.0200217	20.0564	-0.141348	-0.0200217	19.9355	-0.150072
Patient[T.Pat_198]:Time[T.Late]	Pat_198:Late	Pat_198:Late_C5	C5	Cluster_5	-0.612	0.48	0.21	0.5634	0	52.6425	0	0	51.3175	-0.0367782	0	51.3175	-0.0367782	-0.0392267	49.6256	-0.0851445	-0.0392267	42.7984	-0.298672
Patient[T.Pat_726]:Time[T.Late]	Pat_726:Late	Pat_726:Late_C8	C8	Cluster_8	-3.546	3.157	1.342	0.749067	0	3.77925	0	-0.0472744	3.6062	-0.0676206	-0.0472744	3.6062	-0.0676206	-0.0472744	3.05346	-0.307655	-0.0472744	2.02736	-0.898496
Patient[T.Pat_1335]:Time[T.Late]	Pat_1335:Late	Pat_1335:Late_C7	C7	Cluster_7	-3.324	3.113	1.294	0.715667	0	9.71358	0	0	9.71259	-0.000147043	-0.0714239	8.0226	-0.275933	-0.0714239	8.14199	-0.254621	-0.0714239	8.28327	-0.229803
Patient[T.Pat_309]:Time[T.Late]	Pat_309:Late	Pat_309:Late_C6	C6	Cluster_6	-1.127	0.826	0.346	0.537267	0	24.57	0	0	24.6353	0.00383097	0	24.6353	0.00383097	-0.0777127	22.8908	-0.10213	-0.0777127	24.1596	-0.024298
Patient[T.Pat_208]:Time[T.Late]	Pat_208:Late	Pat_208:Late_C5	C5	Cluster_5	-1.154	0.72	0.356	0.551467	0	52.6425	0	0	52.6425	0	0	52.6425	0	-0.0886917	44.048	-0.257153	-0.0886917	44.1098	-0.255131
Patient[T.Pat_1401]:Time[T.Late]	Pat_1401:Late	Pat_1401:Late_C3	C3	Cluster_3	-4.188	3.345	1.489	0.689	0	21.9447	0	0	21.9447	0	-0.111879	19.7275	-0.153662	-0.111879	19.7058	-0.15525	-0.111879	18.2519	-0.265824
Patient[T.Pat_453]:Time[T.Late]	Pat_453:Late	Pat_453:Late_C3	C3	Cluster_3	-4.5	2.272	1.123	0.571533	0	21.9447	0	0	21.9447	0	0	22.2372	0.0191058	-0.111884	19.7018	-0.155544	-0.111884	19.696	-0.155969
Patient[T.Pat_208]:Time[T.Late]	Pat_208:Late	Pat_208:Late_C1	C1	Cluster_1	-0.781	0.377	0.241	0.597733	0	86.7929	0	0	86.7929	0	0	86.7929	0	-0.120921	70.3196	-0.303651	-0.120921	70.4182	-0.301629
Patient[T.Pat_208]:Time[T.Late]	Pat_208:Late	Pat_208:Late_C6	C6	Cluster_6	-1.514	0.875	0.441	0.582467	0	24.57	0	0	24.57	0	0	24.57	0	-0.130745	19.712	-0.317824	-0.130745	19.7396	-0.315802
Patient[T.Pat_198]:Time[T.Late]	Pat_198:Late	Pat_198:Late_C8	C8	Cluster_8	-1.016	0.718	0.358	0.5594	0	3.77925	0	0	3.68412	-0.0367782	0	3.68412	-0.0367782	-0.141508	3.21628	-0.232706	-0.141508	2.7738	-0.446233
Patient[T.Pat_1401]:Time[T.Late]	Pat_1401:Late	Pat_1401:Late_C4	C4	Cluster_4	-3.239	2.723	1.104	0.672333	0	22.1209	0	0	22.1209	0	-0.16135	18.9261	-0.225034	-0.16135	18.9053	-0.226622	-0.16135	17.5105	-0.337196
Patient[T.Pat_726]:Time[T.Late]	Pat_726:Late	Pat_726:Late_C2	C2	Cluster_2	-6.314	3.602	1.643	0.550467	0	11.502	0	0	11.5067	0.000581933	0	11.5067	0.000581933	-0.182125	8.12076	-0.502203	-0.182125	5.39182	-1.09304
Patient[T.Pat_1335]:Time[T.Late]	Pat_1335:Late	Pat_1335:Late_C8	C8	Cluster_8	-3.202	2.259	1.143	0.658333	0	3.77925	0	0	3.77886	-0.000147043	-0.262956	2.57727	-0.552255	-0.262956	2.61562	-0.530943	-0.262956	2.66101	-0.506126
Patient[T.Pat_1585]:Time[T.Late]	Pat_1585:Late	Pat_1585:Late_C10	C10	Cluster_10	-3.6	2.363	1.201	0.671867	0	4.99044	0	0	4.99044	0	-0.274487	3.6363	-0.456697	-0.274487	3.50813	-0.508464	-0.274487	3.48698	-0.517188
Patient[T.Pat_1875]:Time[T.Late]	Pat_1875:Late	Pat_1875:Late_C1	C1	Cluster_1	-5.084	2.491	1.31	0.593267	0	86.7929	0	0	86.7929	0	0	77.0338	-0.172085	-0.287499	58.9386	-0.558363	-0.287499	72.1271	-0.267035
Patient[T.Pat_309]:Time[T.Late]	Pat_309:Late	Pat_309:Late_C8	C8	Cluster_8	-1.573	0.477	0.554	0.846133	0	3.77925	0	-0.361877	2.63874	-0.518248	-0.361877	2.63874	-0.518248	-0.361877	2.65002	-0.512093	-0.361877	2.79692	-0.434261
Patient[T.Pat_453]:Time[T.Late]	Pat_453:Late	Pat_453:Late_C6	C6	Cluster_6	-7.194	2.291	1.918	0.6508	0	24.57	0	0	24.57	0	-0.508705	14.9702	-0.7148	-0.508705	14.8335	-0.728035	-0.508705	14.8291	-0.72846
Patient[T.Pat_1335]:Time[T.Late]	Pat_1335:Late	Pat_1335:Late_C5	C5	Cluster_5	-4.344	1.601	1.273	0.612667	0	52.6425	0	0	52.6372	-0.000147043	0	46.6973	-0.17289	-0.551771	27.2946	-0.947615	-0.551771	27.7682	-0.922798
Patient[T.Pat_267]:Time[T.Late]	Pat_267:Late	Pat_267:Late_C2	C2	Cluster_2	-2.328	0.873	0.758	0.702267	0	11.502	0	0	10.5198	-0.128778	-0.596102	5.83173	-0.979895	-0.596102	6.12121	-0.910002	-0.596102	5.80837	-0.985685
Patient[T.Pat_267]:Time[T.Late]	Pat_267:Late	Pat_267:Late_C0	C0	Cluster_0	-2.015	0.335	0.647	0.570267	0	184.108	0	0	168.387	-0.128778	0	169.426	-0.119901	-0.771654	82.2043	-1.16327	-0.771654	78.0031	-1.23895
Patient[T.Pat_272]:Time[T.Late]	Pat_272:Late	Pat_272:Late_C0	C0	Cluster_0	-4.72	0.242	1.427	0.9276	-2.29385	3.57514	-5.68641	-2.29385	3.57514	-5.68641	-2.29385	3.57514	-5.68641	-2.29385	3.57514	-5.68641	-2.29385	3.60735	-5.67347

## Sheet: Intercepts
Cell Type	Final Parameter	HDI 3%	HDI 97%	SD	Expected Sample	Expected fracion
Cluster_0	4.107	3.148	5.054	0.528	184.108	0.425479
Cluster_1	3.355	2.301	4.307	0.502	86.7929	0.200581
Cluster_2	1.334	0.484	2.252	0.465	11.502	0.0265815
Cluster_3	1.98	0.917	3.259	0.624	21.9447	0.0507147
Cluster_4	1.988	1.063	2.824	0.47	22.1209	0.0511221
Cluster_5	2.855	1.777	3.853	0.57	52.6425	0.121658
Cluster_6	2.093	1.114	3.134	0.498	24.57	0.0567818
Cluster_7	1.165	0.329	1.912	0.433	9.71358	0.0224483
Cluster_8	0.221	-0.698	1.129	0.474	3.77925	0.00873393
Cluster_9	1.247	0.413	2.186	0.47	10.5437	0.0243667
Cluster_10	0.499	-0.419	1.407	0.499	4.99044	0.011533

## Sheet: Cluster distribution
Cluster	Pat_1335	Pat_1401	Pat_1585	Pat_1875	Pat_453	Pat_726	Pat_036	Pat_198	Pat_208	Pat_267	Pat_272	Pat_309	Grand Total		Cluster	Early	Late	Grand Total
0	286	189	190	76	95	147	3	217	336	18		118	1675		0	983	692	1675	CD8 Naïve T cells (LEF1+, CD62L+, CCR7+, Granzyme K)	Early memory CD8 subset
1	192	59	197	74	79	31		84	103	40	2	79	940		1	632	308	940	Exhausted CD8 cells CCL5+, CD62L-, IL7R+, CD99+, Annexin 1A+, Hopx, smattering T-BET+	Exhausted CD8
2	14	3	13	311	93	4		12	17			7	474		2	438	36	474	CD8 Central memory cells CD62L+, CCR7+, NELL2+, CXCR4+, enriched in Early Treated	Transitional memory
3	13	6	34	27	4	246		7	37	29		51	454		3	330	124	454	CD8 , fraction T-BET + , EOMES+, Granzymes A,K, M, NFATC2, LCK high, CD74+, IL9R (traces), CXCR5 (traces in Late)	Activated cytotoxic effector memory		.
4	20	7	11	37	90	30		23	33	1		174	426		4	195	231	426	CD8 CD62L+, CCR7+, IFN response (STAT1), enriched in Late-treated	Central memory with interferon stimualted genes
5	20	77	55	13	57	57		53	16	24	3	29	404		5	279	125	404	CD8, CCR7+, LEF1+	Early memory CD8 subset
6	9	81	34	11	74	49		71	2	7		24	362		6	258	104	362	CD8+ IL7R+, CCR7+, LEF1+, NELL2+, low CD8B, ATF4+ (stressed cells, pre-exhausted?)	Stem-like CD8 subset
7	17	8	63	2	2	3		4	38	2		60	199		7	95	104	199	CD8 , IFN response (STAT1), fraction T-BET +, EOMES+, Granzymes A,B,H, NFATC2, CD74, HOPX	Effector memory CD8 subset
8	9	3	1	4	1			1	2	4	72		97		8	18	79	97	Tc1: IL7R+, STAT4+, NFATC2, HOPX+	Long-lived effector memory
9	6	5	6	14	6	18		5	13	3	2	10	88		9	55	33	88	Mix CD8alpha/alpha CD8alpha/beta NFATC2, ZBTB20+, SLFN5+	Regulatory-like memory
10	14	28	4	4	1	1		4		1		6	63		10	52	11	63	CCL5+, KLRC2 (NKG2C+), CXCR3+, HOPX+	NK-like cytotoxic effector memory CD8 subset
Grand Total	600	466	608	573	502	586	3	481	597	129	79	558	5182		Grand Total	3335	1847	5182
Cluster	Pat_1335	Pat_1401	Pat_1585	Pat_1875	Pat_453	Pat_726	Pat_036	Pat_198	Pat_208	Pat_267	Pat_272	Pat_309	Grand Total		Cluster	Early	Late	Grand Total
0	0.477	0.406	0.313	0.133	0.189	0.251	1	0.451	0.563	0.14	0	0.211	1675		0	0.295	0.375	1675
1	0.32	0.127	0.324	0.129	0.157	0.053	0	0.175	0.173	0.31	0.025	0.142	940		1	0.19	0.167	940
2	0.023	0.006	0.021	0.543	0.185	0.007	0	0.025	0.028	0	0	0.013	474		2	0.131	0.019	474
3	0.022	0.013	0.056	0.047	0.008	0.42	0	0.015	0.062	0.225	0	0.091	454		3	0.099	0.067	454
4	0.033	0.015	0.018	0.065	0.179	0.051	0	0.048	0.055	0.008	0	0.312	426		4	0.058	0.125	426
5	0.033	0.165	0.09	0.023	0.114	0.097	0	0.11	0.027	0.186	0.038	0.052	404		5	0.084	0.068	404
6	0.015	0.174	0.056	0.019	0.147	0.084	0	0.148	0.003	0.054	0	0.043	362		6	0.077	0.056	362
7	0.028	0.017	0.104	0.003	0.004	0.005	0	0.008	0.064	0.016	0	0.108	199		7	0.028	0.056	199
8	0.015	0.006	0.002	0.007	0.002	0	0	0.002	0.003	0.031	0.911	0	97		8	0.005	0.043	97
9	0.01	0.011	0.01	0.024	0.012	0.031	0	0.01	0.022	0.023	0.025	0.018	88		9	0.016	0.018	88
10	0.023	0.06	0.007	0.007	0.002	0.002	0	0.008	0	0.008	0	0.011	63		10	0.016	0.006	63
Grand Total	600	466	608	573	502	586	3	481	597	129	79	558	5182		Grand Total	1	1	5182
