# Supplementary material for: Duration of Initial Viremia Modulates Functional Properties of HIV-specific T Cell Receptors
Source: Research Square preprint supplement (doi:10.21203/rs.3.rs-6668459/v1), 2026-02-18
Supplement: Supplementary file 3 [file b600e8e129288da5f58e2524.xlsx]

## Sheet: Ag_CD3_KW11_TW10_IW9
Antigen	Patient	Cell barcode	Ag_CD3_ratio	AbovedMedian	v_call	d_call	j_call	cdr3_aa	junction_aa
IW9	Pat_036	CGAACATCAGCATGAG	0.137405	FALSE	TRBV9*02		TRBJ1-2*01	ASSALNFLYGYT	CASSALNFLYGYTF
IW9	Pat_036	AACTGGTAGGCCCGTT	0.0530726	FALSE	TRBV6-5*01		TRBJ1-5*01	ASSELGNQPQH	CASSELGNQPQHF
IW9	Pat_036	GACAGAGCAGTCAGCC	0.109091	FALSE	TRBV6-1*01	TRBD1*01	TRBJ1-5*01	ASSESPGDSNQPQH	CASSESPGDSNQPQHF
IW9	Pat_036	AAAGCAAGTCGTTGTA	0.109705	FALSE	TRBV7-9*01		TRBJ1-4*01	ASSFDEKLF	CASSFDEKLFF
IW9	Pat_036	GCGCGATCACCGCTAG	0.134615	FALSE	TRBV4-1*01	TRBD1*01	TRBJ1-1*01	ASSPDRGGELNF	CASSPDRGGELNFF
IW9	Pat_036	TCTATTGCAGCGTTCG	0.0410959	FALSE	TRBV4-3*01	TRBD1*01	TRBJ2-4*01	ASSQDRQGGYIQY	CASSQDRQGGYIQYF
IW9	Pat_036	TAAGTGCGTAACGTTC	0.165354	FALSE	TRBV4-1*01	TRBD1*01	TRBJ2-7*01	ASSQGGGYEQY	CASSQGGGYEQYF
IW9	Pat_036	ATCTGCCTCTTAGAGC	0.119318	FALSE	TRBV7-8*03	TRBD1*01	TRBJ1-1*01	ASSRFDRDTEAF	CASSRFDRDTEAFF
IW9	Pat_036	CATCAGAAGTGAAGTT	0.0650888	FALSE	TRBV9*02		TRBJ2-1*01	ASSVVTYNEQF	CASSVVTYNEQFF
IW9	Pat_036	CACAAACAGAGACTAT	0.178571	TRUE	TRBV7-9*01	TRBD2*01	TRBJ2-3*01	AINAGGTDTQY	CAINAGGTDTQYF
IW9	Pat_036	GATCGCGAGCACACAG	0.458824	TRUE	TRBV7-9*01		TRBJ1-1*01	ASSLGARDTEAF	CASSLGARDTEAFF
IW9	Pat_036	AAGTCTGAGGACACCA	0.223301	TRUE	TRBV7-6*01		TRBJ2-1*01	ASSLGYNEQF	CASSLGYNEQFF
IW9	Pat_036	GACGTTAAGATCCCAT	0.264706	TRUE	TRBV7-8*01		TRBJ2-7*01	ASSPDIYEQY	CASSPDIYEQYF
IW9	Pat_036	TCAGCAAGTCCTAGCG	0.175	TRUE	TRBV7-3*01	TRBD2*02	TRBJ2-3*01	ASSPGRTSTDTQY	CASSPGRTSTDTQYF
IW9	Pat_036	GACGTGCGTTGGTTTG	0.253333	TRUE	TRBV4-3*01		TRBJ1-5*01	ASSQDHSNQPQH	CASSQDHSNQPQHF
IW9	Pat_036	GACACGCAGGGTTTCT	0.188312	TRUE	TRBV13*01	TRBD1*01	TRBJ1-5*01	ASSQRGSNQPQH	CASSQRGSNQPQHF
IW9	Pat_036	GATGAAATCCCTAACC	0.494505	TRUE	TRBV4-3*01	TRBD2*01	TRBJ2-1*01	ASSQVSGGSYNEQF	CASSQVSGGSYNEQFF
IW9	Pat_036	CAAGATCAGACTGTAA	0.272727	TRUE	TRBV7-9*01	TRBD1*01	TRBJ2-2*01	ASSRGTVNTGELF	CASSRGTVNTGELFF
KW11	Pat_036	CCCAGTTAGCGAAGGG	0.541667	FALSE	TRBV6-5*01	TRBD1*01	TRBJ2-7*01	ASRKQGYEQY	CASRKQGYEQYF
KW11	Pat_036	GTAGTCAAGGTTCCTA	0.397661	FALSE	TRBV7-3*01	TRBD1*01	TRBJ1-1*01	ASSDSLNTEAF	CASSDSLNTEAFF
KW11	Pat_036	GCAAACTGTAAACCTC	0.441718	FALSE	TRBV7-9*03	TRBD2*01	TRBJ1-4*01	ASSFAGLDEKLF	CASSFAGLDEKLFF
KW11	Pat_036	GAACCTAGTGATGTCT	0.346939	FALSE	TRBV4-3*01	TRBD2*01	TRBJ2-5*01	ASSHSTGVQETQY	CASSHSTGVQETQYF
KW11	Pat_036	GACCAATTCATCGATG	0.614035	FALSE	TRBV4-3*01	TRBD1*01	TRBJ1-6*02	ASSHVQGSLH	CASSHVQGSLHF
KW11	Pat_036	CGACTTCAGTCTCCTC	0.520548	FALSE	TRBV7-9*01	TRBD1*01	TRBJ2-2*01	ASSLAPGTGAPNTGELF	CASSLAPGTGAPNTGELFF
KW11	Pat_036	ACGTCAACAATCCAAC	0.803571	FALSE	TRBV5-1*01	TRBD1*01	TRBJ1-1*01	ASSLGGGGTEAF	CASSLGGGGTEAFF
KW11	Pat_036	AACTTTCCACAGACAG	0.8	FALSE	TRBV4-1*01	TRBD2*01	TRBJ1-2*01	ASSLGGGTVYGYT	CASSLGGGTVYGYTF
KW11	Pat_036	GTAGTCATCTGCTGCT	0.596774	FALSE	TRBV7-9*01	TRBD1*01	TRBJ1-1*01	ASSLGLGTTAEAF	CASSLGLGTTAEAFF
KW11	Pat_036	TCTCTAAAGACTTGAA	0.677686	FALSE	TRBV7-8*01	TRBD2*02	TRBJ1-2*01	ASSLGSGRDNYGYT	CASSLGSGRDNYGYTF
KW11	Pat_036	GTCTTCGCACGCTTTC	0.602871	FALSE	TRBV13*01	TRBD2*01	TRBJ2-1*01	ASSLRGMDEQF	CASSLRGMDEQFF
KW11	Pat_036	GCCTCTACAGTTCATG	0.654206	FALSE	TRBV6-5*01		TRBJ2-1*01	ASSPPESYNEQF	CASSPPESYNEQFF
KW11	Pat_036	GAATAAGGTCAGTGGA	0.63964	FALSE	TRBV6-5*01	TRBD1*01	TRBJ1-2*01	ASSPTGDGYT	CASSPTGDGYTF
KW11	Pat_036	GGTATTGCAGTTCATG	0.557471	FALSE	TRBV4-1*01	TRBD1*01	TRBJ1-2*01	ASSQGQGYGYT	CASSQGQGYGYTF
KW11	Pat_036	CCACCTATCCCAACGG	0.738462	FALSE	TRBV13*01	TRBD2*01	TRBJ1-3*01	ASSQRGISGNTIY	CASSQRGISGNTIYF
KW11	Pat_036	GGTGAAGGTAAACCTC	0.385475	FALSE	TRBV11-2*01	TRBD1*01	TRBJ2-7*01	ASSRHGTGSIYEQY	CASSRHGTGSIYEQYF
KW11	Pat_036	GGGTCTGGTACATGTC	0.573248	FALSE	TRBV7-9*01	TRBD1*01	TRBJ2-2*01	ASSSPIQGPGELF	CASSSPIQGPGELFF
KW11	Pat_036	CCCAATCGTAGGCATG	0.217033	FALSE	TRBV13*01	TRBD1*01	TRBJ1-1*01	ASSSTGGLTEAF	CASSSTGGLTEAFF
KW11	Pat_036	TACTCATTCCCTCAGT	0.589928	FALSE	TRBV7-2*01		TRBJ1-1*01	ASSSTPTDEGEAF	CASSSTPTDEGEAFF
KW11	Pat_036	CAAGATCGTTTGGGCC	0.445312	FALSE	TRBV7-3*01	TRBD2*01	TRBJ1-1*01	ASSTGGDTEAF	CASSTGGDTEAFF
KW11	Pat_036	AGATCTGTCCTTGGTC	0.766423	FALSE	TRBV6-4*01	TRBD2*01	TRBJ2-1*01	ASSYRGGSNEQF	CASSYRGGSNEQFF
KW11	Pat_036	GTATCTTTCGCACTCT	1.13699	TRUE	TRBV6-2*01	TRBD1*01	TRBJ1-5*01	ASQKTDRGQRQH	CASQKTDRGQRQHF
KW11	Pat_036	TGGCCAGTCGGCTACG	0.898876	TRUE	TRBV7-9*03	TRBD1*01	TRBJ1-1*01	ASRPGTGTEAF	CASRPGTGTEAFF
KW11	Pat_036	TATGCCCGTGGCCCTA	1.38372	TRUE	TRBV7-2*01		TRBJ1-5*01	ASSFFPLNQPQH	CASSFFPLNQPQHF
KW11	Pat_036	ACTATCTGTAGCACGA	0.856	TRUE	TRBV5-1*01		TRBJ1-1*01	ASSFTVNTEAF	CASSFTVNTEAFF
KW11	Pat_036	GTGCGGTTCTGGTGTA	1.07339	TRUE	TRBV7-3*01		TRBJ1-1*01	ASSHDPPLEAF	CASSHDPPLEAFF
KW11	Pat_036	GGCTGGTGTATTAGCC	1.26957	TRUE	TRBV6-6*01	TRBD1*01	TRBJ1-6*02	ASSKTELSYNSPLH	CASSKTELSYNSPLHF
KW11	Pat_036	TGACGGCAGGTGTTAA	0.84106	TRUE	TRBV7-9*01	TRBD1*01	TRBJ1-2*01	ASSLEQGS	CASSLEQGSF
KW11	Pat_036	GGGACCTGTATTCTCT	1.33333	TRUE	TRBV5-1*01	TRBD1*01	TRBJ1-1*01	ASSLGTENTEAF	CASSLGTENTEAFF
KW11	Pat_036	AGGTCCGAGTGGGCTA	0.87234	TRUE	TRBV7-3*01		TRBJ2-7*01	ASSLNPSYEQY	CASSLNPSYEQYF
KW11	Pat_036	AACTTTCCACCGCTAG	1.92233	TRUE	TRBV7-9*01	TRBD2*01	TRBJ2-3*01	ASSLPGDTDTQY	CASSLPGDTDTQYF
KW11	Pat_036	AGCTCTCTCGTCTGAA	0.870504	TRUE	TRBV5-6*01		TRBJ1-2*01	ASSLSNDDNYGYT	CASSLSNDDNYGYTF
KW11	Pat_036	TTAGTTCAGGAGTACC	1.14286	TRUE	TRBV7-9*01	TRBD1*01	TRBJ2-7*01	ASSLVGGHEQY	CASSLVGGHEQYF
KW11	Pat_036	CTCGAGGGTCTCTCGT	0.928571	TRUE	TRBV7-8*01	TRBD1*01	TRBJ1-6*02	ASSLVGRDSPLH	CASSLVGRDSPLHF
KW11	Pat_036	GTGAAGGAGCACCGTC	2.13281	TRUE	TRBV4-3*01	TRBD1*01	TRBJ2-4*01	ASSQDNRGLAKNIQY	CASSQDNRGLAKNIQYF
KW11	Pat_036	TACAGTGTCGCCGTGA	3.76	TRUE	TRBV7-3*01	TRBD2*01	TRBJ2-4*01	ASSSGLGVNIQY	CASSSGLGVNIQYF
KW11	Pat_036	TCAATCTTCGCGCCAA	0.923913	TRUE	TRBV7-9*01	TRBD1*01	TRBJ1-2*01	ASSSVDSPYGYT	CASSSVDSPYGYTF
KW11	Pat_036	ATTCTACCACGGATAG	0.9375	TRUE	TRBV9*02	TRBD1*01	TRBJ1-4*01	ASSTGDRGREKLF	CASSTGDRGREKLFF
KW11	Pat_036	GTGCAGCCAACTGCGC	1.50602	TRUE	TRBV9*02		TRBJ1-1*01	ASSVIEGTEAF	CASSVIEGTEAFF
KW11	Pat_036	ACACCAAAGCGGCTTC	0.983471	TRUE	TRBV6-5*01	TRBD2*02	TRBJ1-3*01	ASSYGENGNTIY	CASSYGENGNTIYF
KW11	Pat_036	CGATGTATCAACACCA	1.35345	TRUE	TRBV6-2*01	TRBD1*01	TRBJ2-1*01	ATGTGNEQF	CATGTGNEQFF
TW10	Pat_036	TCAGCTCGTAGGACAC	0.142857	FALSE	TRBV5-6*01	TRBD1*01	TRBJ2-7*01	ASSGGHSTYEQY	CASSGGHSTYEQYF
TW10	Pat_036	TCAGCTCCATGGGACA	0.164286	FALSE	TRBV7-8*01	TRBD1*01	TRBJ2-7*01	ASSMTGTDEQY	CASSMTGTDEQYF
TW10	Pat_036	ATCTGCCTCTCCAACC	0.528986	FALSE	TRBV4-3*01	TRBD2*01	TRBJ2-3*01	ASSQDEGLASTDTQY	CASSQDEGLASTDTQYF
KW11	Pat_1335	GGTGAAGTCCTGCAGG	0.169811	FALSE	TRBV5-4*01	TRBD1*01	TRBJ2-5*01	ASSEGRTGVEETQY	CASSEGRTGVEETQYF
KW11	Pat_1335	CGTTGGGTCGTCCAGG	0.236364	FALSE	TRBV13*01		TRBJ1-2*01	ASSLGFQHYGYT	CASSLGFQHYGYTF
KW11	Pat_1335	AGTGAGGGTCACTGGC	0.66	TRUE	TRBV6-1*01		TRBJ1-1*01	ASSEEISLNTEAF	CASSEEISLNTEAFF
KW11	Pat_1335	CACATAGTCGTTTGCC	0.778626	TRUE	TRBV6-2*01	TRBD2*01	TRBJ2-1*01	ASSYSASGGAHEQF	CASSYSASGGAHEQFF
KW11	Pat_1585	TATCAGGAGAAACGCC	0.755556	FALSE	TRBV6-5*01	TRBD1*01	TRBJ1-1*01	ASIRSGDTEAF	CASIRSGDTEAFF
KW11	Pat_1585	TCACGAACACCAGATT	0.391304	FALSE	TRBV5-1*01	TRBD1*01	TRBJ2-3*01	ASSHDRVTDTQY	CASSHDRVTDTQYF
KW11	Pat_1585	GGATTACTCCTCGCAT	0.413793	FALSE	TRBV10-2*01	TRBD2*01	TRBJ2-5*01	ASSLAGGGETQY	CASSLAGGGETQYF
KW11	Pat_1585	AAACGGGAGATCTGAA	0.275862	FALSE	TRBV9*01	TRBD2*01	TRBJ2-3*01	ASSLATSSYTDTQY	CASSLATSSYTDTQYF
KW11	Pat_1585	TGACTTTCACCGTTGG	0.711111	FALSE	TRBV13*01	TRBD2*01	TRBJ2-4*01	ASSLGMGGNIQY	CASSLGMGGNIQYF
KW11	Pat_1585	GTGGGTCTCCTCAACC	0.397959	FALSE	TRBV7-6*01	TRBD1*01	TRBJ2-7*01	ASSLGQGAYEQY	CASSLGQGAYEQYF
KW11	Pat_1585	TTCTTAGTCAAACGGG	0.482143	FALSE	TRBV6-1*01	TRBD2*01	TRBJ2-7*01	ASSLPEGGSSYEQY	CASSLPEGGSSYEQYF
KW11	Pat_1585	TTCCCAGCATACGCTA	0.646465	FALSE	TRBV6-2*01	TRBD2*01	TRBJ1-2*01	ASSPAGGGAHYGYT	CASSPAGGGAHYGYTF
KW11	Pat_1585	ATCCGAAGTGCGATAG	0.590476	FALSE	TRBV6-5*01	TRBD2*01	TRBJ2-7*01	ASSPGYEQY	CASSPGYEQYF
KW11	Pat_1585	GTTAAGCCACATAACC	0.33913	FALSE	TRBV7-9*03	TRBD2*01	TRBJ1-2*01	ASSPPEPAGAGGYT	CASSPPEPAGAGGYTF
KW11	Pat_1585	CCTACACCACTATCTT	0.287356	FALSE	TRBV5-1*01	TRBD1*01	TRBJ1-1*01	ASSPRTGENTEAF	CASSPRTGENTEAFF
KW11	Pat_1585	TAGGCATTCTTTCCTC	0.364865	FALSE	TRBV7-6*01	TRBD1*01	TRBJ1-1*01	ASSPWTDNTEAF	CASSPWTDNTEAFF
KW11	Pat_1585	TTAGTTCCACTAAGTC	0.457143	FALSE	TRBV4-1*01	TRBD1*01	TRBJ1-6*02	ASSQDGGQYNSPLH	CASSQDGGQYNSPLHF
KW11	Pat_1585	TGGTTAGGTAATTGGA	0.466667	FALSE	TRBV4-1*01	TRBD2*01	TRBJ2-7*01	ASSQDLGLAGGQNEQY	CASSQDLGLAGGQNEQYF
KW11	Pat_1585	GGGAGATAGTCGCCGT	0.774194	FALSE	TRBV4-1*01		TRBJ2-3*01	ASSQDNQESTDTQY	CASSQDNQESTDTQYF
KW11	Pat_1585	TCCACACTCCCACTTG	0.658537	FALSE	TRBV5-6*01	TRBD1*01	TRBJ2-2*01	ASSSGTATGELF	CASSSGTATGELFF
KW11	Pat_1585	GGACATTCAGGGTTAG	0.74	FALSE	TRBV6-5*01	TRBD1*01	TRBJ1-1*01	ASSSYDRGGMNTEAF	CASSSYDRGGMNTEAFF
KW11	Pat_1585	GGATGTTCATTGTGCA	0.6875	FALSE	TRBV6-5*01	TRBD1*01	TRBJ2-1*01	ASSYSTTGSEQF	CASSYSTTGSEQFF
KW11	Pat_1585	GTGGGTCTCTGGCGTG	1.20588	TRUE	TRBV13*01		TRBJ2-7*01	ASNLEGLKQY	CASNLEGLKQYF
KW11	Pat_1585	GGGAATGGTGTCTGAT	0.777778	TRUE	TRBV10-2*01		TRBJ1-1*01	ASSDSDFTEAF	CASSDSDFTEAFF
KW11	Pat_1585	GCTGCTTTCAGGATCT	8.4	TRUE	TRBV2*01	TRBD1*01	TRBJ2-7*01	ASSEGYRVGPYEQY	CASSEGYRVGPYEQYF
KW11	Pat_1585	GACGTGCTCGTGACAT	1.28571	TRUE	TRBV11-2*01	TRBD1*01	TRBJ2-5*01	ASSFEGGSGTEETQY	CASSFEGGSGTEETQYF
KW11	Pat_1585	AAGACCTCAATAGCAA	1.25	TRUE	TRBV13*01	TRBD1*01	TRBJ2-7*01	ASSHAGTTVYEQY	CASSHAGTTVYEQYF
KW11	Pat_1585	GGAAAGCCAGCTATTG	1.09302	TRUE	TRBV7-9*03	TRBD2*02	TRBJ2-7*01	ASSLAAAGYEQY	CASSLAAAGYEQYF
KW11	Pat_1585	TACGGGCAGGCTAGCA	0.930233	TRUE	TRBV7-8*01	TRBD1*01	TRBJ1-2*01	ASSLAAGGFENYGYT	CASSLAAGGFENYGYTF
KW11	Pat_1585	TGGCGCATCCCTTGCA	0.870968	TRUE	TRBV5-1*01		TRBJ1-1*01	ASSLGEEFGSNTEAF	CASSLGEEFGSNTEAFF
KW11	Pat_1585	GCAGTTACATAGTAAG	0.9	TRUE	TRBV4-1*01	TRBD1*01	TRBJ1-1*01	ASSLGSSTGRNTEAF	CASSLGSSTGRNTEAFF
KW11	Pat_1585	ATCTGCCTCTTCGGTC	0.775	TRUE	TRBV5-1*01	TRBD1*01	TRBJ1-1*01	ASSLIGVDTEAF	CASSLIGVDTEAFF
KW11	Pat_1585	GCATGATGTCTTCAAG	1.825	TRUE	TRBV6-2*01		TRBJ2-3*01	ASSLYTLGTDTQY	CASSLYTLGTDTQYF
KW11	Pat_1585	CTTAGGAGTCAGAAGC	0.918919	TRUE	TRBV6-5*01	TRBD2*01	TRBJ2-1*01	ASSPRTNLWNEQF	CASSPRTNLWNEQFF
KW11	Pat_1585	AGATTGCGTTCAACCA	1.35088	TRUE	TRBV6-5*01	TRBD1*01	TRBJ2-3*01	ASSQPTGAETDTQY	CASSQPTGAETDTQYF
KW11	Pat_1585	TTGGAACTCTGTCTAT	2.33333	TRUE	TRBV5-6*01	TRBD2*02	TRBJ1-2*01	ASSSDEQGGLGDYGYT	CASSSDEQGGLGDYGYTF
KW11	Pat_1585	AGAATAGGTTAAGACA	0.9	TRUE	TRBV4-1*01	TRBD1*01	TRBJ2-5*01	ASSSGQAQETQY	CASSSGQAQETQYF
KW11	Pat_1585	ATCTGCCGTTGCCTCT	0.882353	TRUE	TRBV9*01		TRBJ2-7*01	ASSVGVAGSYEQY	CASSVGVAGSYEQYF
KW11	Pat_1585	TAGTGGTAGCGAGAAA	3.81818	TRUE	TRBV9*02	TRBD2*01	TRBJ2-5*01	ASSVVAGGIQETQY	CASSVVAGGIQETQYF
TW10	Pat_1585	GACAGAGCAGACACTT	0.0113636	FALSE	TRBV5-1*01	TRBD2*01	TRBJ2-3*01	ASRGLGGDDTQY	CASRGLGGDDTQYF
IW9	Pat_1875	GGGAATGTCTTCAACT	0.611111	TRUE	TRBV4-1*01		TRBJ1-1*01	ASSQDWLGQNTEAF	CASSQDWLGQNTEAFF
KW11	Pat_1875	CTCGGAGAGGACACCA	0.556338	FALSE	TRBV4-1*01	TRBD1*01	TRBJ1-5*01	ANQWGTGGRINQPQH	CANQWGTGGRINQPQHF
KW11	Pat_1875	CAAGGCCGTCGAATCT	0.718121	FALSE	TRBV6-1*01	TRBD2*01	TRBJ2-5*01	ASSEPGTSGGDQETQY	CASSEPGTSGGDQETQYF
KW11	Pat_1875	GATCTAGTCAAGATCC	0.502793	FALSE	TRBV6-6*01	TRBD1*01	TRBJ2-5*01	ASSERTGTGLDEETQY	CASSERTGTGLDEETQYF
KW11	Pat_1875	GATGCTACAGCCTTGG	0.574468	FALSE	TRBV5-1*01		TRBJ2-5*01	ASSLTTETQY	CASSLTTETQYF
KW11	Pat_1875	CCGGGATGTTCACCTC	0.53125	FALSE	TRBV7-2*01		TRBJ2-5*01	ASSPRALQETQY	CASSPRALQETQYF
KW11	Pat_1875	GGAATAACACCAGGTC	0.845528	FALSE	TRBV4-1*01	TRBD1*01	TRBJ2-1*01	ASSQDQGQEQF	CASSQDQGQEQFF
KW11	Pat_1875	CCTTACGGTATAGTAG	0.55618	FALSE	TRBV5-1*01	TRBD1*01	TRBJ2-1*01	ASSSGQGGDEQF	CASSSGQGGDEQFF
KW11	Pat_1875	TGACGGCCAGGAATGC	0.846774	FALSE	TRBV4-1*01	TRBD1*01	TRBJ2-7*01	ASSSPGHPYEQY	CASSSPGHPYEQYF
KW11	Pat_1875	TAAACCGCACCGCTAG	0.478788	FALSE	TRBV6-5*01		TRBJ2-2*01	ASSYAQGELF	CASSYAQGELFF
KW11	Pat_1875	CGCCAAGAGAAGGCCT	1.00962	TRUE	TRBV6-5*01	TRBD1*01	TRBJ2-1*01	ASSKQPGTEDNEQF	CASSKQPGTEDNEQFF
KW11	Pat_1875	CAGCCGAAGGGATACC	1.69892	TRUE	TRBV5-1*01	TRBD1*01	TRBJ1-5*01	ASSLAGGQPQH	CASSLAGGQPQHF
KW11	Pat_1875	ACGATGTTCTCAAGTG	1.4	TRUE	TRBV7-9*03	TRBD1*01	TRBJ2-1*01	ASSLATGIRVNEQF	CASSLATGIRVNEQFF
KW11	Pat_1875	GATCGATCAGACGCCT	1.72152	TRUE	TRBV7-9*03	TRBD1*01	TRBJ2-4*01	ASSLATGVAKNIQY	CASSLATGVAKNIQYF
KW11	Pat_1875	GGACAAGAGTGAACAT	0.962406	TRUE	TRBV4-1*01		TRBJ1-1*01	ASSQDEGPNTEAF	CASSQDEGPNTEAFF
KW11	Pat_1875	CCCAGTTGTTTACTCT	0.961905	TRUE	TRBV4-2*01		TRBJ2-7*01	ASSQGFGSYEQY	CASSQGFGSYEQYF
TW10	Pat_1875	ACGGCCAAGCCAACAG	0.169935	FALSE	TRBV6-5*01	TRBD1*01	TRBJ1-6*02	ASSYSSDSQSPLH	CASSYSSDSQSPLHF
TW10	Pat_1875	TCATTTGCAGCTGTTA	0.194631	FALSE	TRBV6-5*01	TRBD1*01	TRBJ2-3*01	ASSYSWTGGTDTQY	CASSYSWTGGTDTQYF
IW9	Pat_198	ATCATGGAGCCGATTT	0.358974	FALSE	TRBV10-2*01	TRBD1*01	TRBJ2-7*01	ASSEGGRGFSYEQY	CASSEGGRGFSYEQYF
IW9	Pat_198	TTTCCTCCACCATGTA	0.26087	FALSE	TRBV7-6*01	TRBD1*01	TRBJ1-1*01	ASSSGQGANTEAF	CASSSGQGANTEAFF
IW9	Pat_198	GACGGCTAGAGTGACC	0.585366	TRUE	TRBV10-3*01		TRBJ2-3*01	AIRDVTDTQY	CAIRDVTDTQYF
IW9	Pat_198	ACACCAATCAGTCAGT	0.555556	TRUE	TRBV6-1*01		TRBJ2-7*01	ASSDSSYEQY	CASSDSSYEQYF
KW11	Pat_198	CATCCACTCACTATTC	1.38636	FALSE	TRBV6-1*01		TRBJ2-7*01	ASSEILTYEQY	CASSEILTYEQYF
KW11	Pat_198	GTTCATTTCGGAGGTA	1.16071	FALSE	TRBV6-1*01		TRBJ2-1*01	ASSESWDSYNEQF	CASSESWDSYNEQFF
KW11	Pat_198	GTTCTCGCATGGTAGG	1.30435	FALSE	TRBV4-1*01	TRBD1*01	TRBJ2-1*01	ASSHRTGGYNEQF	CASSHRTGGYNEQFF
KW11	Pat_198	ATTGGACTCTTAACCT	1.35088	FALSE	TRBV7-2*02	TRBD2*02	TRBJ2-1*01	ASSLALAGGLSEQF	CASSLALAGGLSEQFF
KW11	Pat_198	GGCCGATCACAGGCCT	1.01471	FALSE	TRBV5-1*01	TRBD1*01	TRBJ1-2*01	ASSLGGRANYGYT	CASSLGGRANYGYTF
KW11	Pat_198	AGCAGCCCACAAGCCC	0.858974	FALSE	TRBV7-3*01	TRBD1*01	TRBJ2-7*01	ASSLGVGRDRSYEQY	CASSLGVGRDRSYEQYF
KW11	Pat_198	GTGCAGCTCTGTACGA	0.556522	FALSE	TRBV6-2*01	TRBD1*01	TRBJ1-1*01	ASSLQGGNTEAF	CASSLQGGNTEAFF
KW11	Pat_198	CAGATCATCTATGTGG	1.04918	FALSE	TRBV6-5*01	TRBD1*01	TRBJ1-1*01	ASSPGTGEAF	CASSPGTGEAFF
KW11	Pat_198	CTAAGACAGACAGACC	1.46809	FALSE	TRBV4-1*01	TRBD1*01	TRBJ1-1*01	ASSQGSRGTEAF	CASSQGSRGTEAFF
KW11	Pat_198	TCGCGAGGTGGTTTCA	1.50794	FALSE	TRBV7-6*01	TRBD1*01	TRBJ2-5*01	ASSRLGGETQY	CASSRLGGETQYF
KW11	Pat_198	GAGTCCGAGACTAGAT	1.42	FALSE	TRBV9*02	TRBD1*01	TRBJ1-1*01	ASSVGDRVAEAF	CASSVGDRVAEAFF
KW11	Pat_198	CTGAAGTGTTAAAGTG	0.797619	FALSE	TRBV6-5*01	TRBD1*01	TRBJ2-7*01	ASSYSGTGEYEQY	CASSYSGTGEYEQYF
KW11	Pat_198	TTGAACGAGTGATCGG	0.953846	FALSE	TRBV6-5*01	TRBD1*01	TRBJ2-7*01	ATLSQGAEQY	CATLSQGAEQYF
KW11	Pat_198	GGGCATCTCACTCTTA	1.82051	TRUE	TRBV6-1*01	TRBD1*01	TRBJ1-4*01	ASMETTLGTGATNEKLF	CASMETTLGTGATNEKLFF
KW11	Pat_198	CGTTGGGCAGGACCCT	2.07843	TRUE	TRBV6-5*01	TRBD1*01	TRBJ2-7*01	ASRQGSREQY	CASRQGSREQYF
KW11	Pat_198	CCTTTCTGTGTATGGG	4.88986	TRUE	TRBV9*02	TRBD2*01	TRBJ2-3*01	ASSAAPLTSTEPLTDTQY	CASSAAPLTSTEPLTDTQYF
KW11	Pat_198	CCCTCCTCAACAACCT	1.57692	TRUE	TRBV7-6*01	TRBD2*01	TRBJ1-2*01	ASSFSEVANRTNYGYT	CASSFSEVANRTNYGYTF
KW11	Pat_198	TCTTCGGGTACATCCA	3.67347	TRUE	TRBV7-3*01	TRBD1*01	TRBJ2-4*01	ASSHRENIQY	CASSHRENIQYF
KW11	Pat_198	GGAAAGCCATGCTGGC	2.89474	TRUE	TRBV6-1*01	TRBD2*02	TRBJ1-5*01	ASSIREPSNQPQH	CASSIREPSNQPQHF
KW11	Pat_198	TAGTTGGAGGAACTGC	2.16364	TRUE	TRBV7-2*01	TRBD1*01	TRBJ2-3*01	ASSLAGAQGDTQY	CASSLAGAQGDTQYF
KW11	Pat_198	GTCCTCATCACCGTAA	2.77419	TRUE	TRBV7-9*03	TRBD2*01	TRBJ2-1*01	ASSLAGTSGGAGSSYNEQF	CASSLAGTSGGAGSSYNEQFF
KW11	Pat_198	CGCGGTAAGGGCACTA	1.79661	TRUE	TRBV4-1*01	TRBD2*02	TRBJ2-2*01	ASSQDRGWDGELF	CASSQDRGWDGELFF
KW11	Pat_198	GCGGGTTGTAGCCTAT	3.65385	TRUE	TRBV4-2*01		TRBJ1-3*01	ASSQDTAESSGNTIY	CASSQDTAESSGNTIYF
KW11	Pat_198	TGGTTAGAGAGTACAT	2.08108	TRUE	TRBV6-5*01	TRBD2*01	TRBJ2-3*01	ASSSSGGNTDTQY	CASSSSGGNTDTQYF
KW11	Pat_198	AGCTCTCCAGGGCATA	1.7551	TRUE	TRBV9*02	TRBD1*01	TRBJ1-1*01	ASSTQGPNTEAF	CASSTQGPNTEAFF
IW9	Pat_208	CAGATCAGTCCGAACC	0.0336538	FALSE	TRBV7-9*03	TRBD1*01	TRBJ1-2*01	ASSLTWDGPSNYGYT	CASSLTWDGPSNYGYTF
IW9	Pat_208	TGAGAGGTCCAGAAGG	0.014433	FALSE	TRBV6-5*01	TRBD1*01	TRBJ2-7*01	ASSYGGSYEQY	CASSYGGSYEQYF
IW9	Pat_208	TTTATGCTCCAGATCA	0.25	TRUE	TRBV9*01	TRBD1*01	TRBJ1-2*01	ASTQGYGYT	CASTQGYGYTF
KW11	Pat_208	AACGTTGAGCTGAAAT	0.0761421	FALSE	TRBV6-1*01		TRBJ2-7*01	ASRDRHYEQY	CASRDRHYEQYF
KW11	Pat_208	ACGATACGTATGAAAC	0.0888889	FALSE	TRBV6-5*01		TRBJ2-2*01	ASRGLAFNTGELF	CASRGLAFNTGELFF
KW11	Pat_208	CTAGCCTCACGTGAGA	0.119565	FALSE	TRBV6-5*01	TRBD1*01	TRBJ1-2*01	ASRPFASGGDGYT	CASRPFASGGDGYTF
KW11	Pat_208	GGCAATTCACGGCTAC	0.0769231	FALSE	TRBV6-1*01	TRBD2*02	TRBJ2-7*01	ASSEGGGTWEQY	CASSEGGGTWEQYF
KW11	Pat_208	CGACTTCGTCTCCATC	0.107143	FALSE	TRBV2*01		TRBJ1-2*01	ASSENLSGNYGYT	CASSENLSGNYGYTF
KW11	Pat_208	ATTGGTGGTTTGTGTG	0.0534759	FALSE	TRBV6-5*01	TRBD1*01	TRBJ2-7*01	ASSHGAGDYEQY	CASSHGAGDYEQYF
KW11	Pat_208	TGCGCAGAGTGGACGT	0.0877193	FALSE	TRBV6-1*01	TRBD1*01	TRBJ2-1*01	ASSLEGQVSYNEQF	CASSLEGQVSYNEQFF
KW11	Pat_208	CTGGTCTGTATAGGTA	0.104839	FALSE	TRBV6-6*01	TRBD2*02	TRBJ1-1*01	ASSLLHGKNTEAF	CASSLLHGKNTEAFF
KW11	Pat_208	TGAGGGAAGACCGGAT	0.0693069	FALSE	TRBV4-1*01		TRBJ2-3*01	ASSQDMAAVDTQY	CASSQDMAAVDTQYF
KW11	Pat_208	TGGCTGGGTTCTGGTA	0.0638298	FALSE	TRBV4-2*01	TRBD1*01	TRBJ1-2*01	ASSQVLRDTVNGYT	CASSQVLRDTVNGYTF
KW11	Pat_208	GATCGATAGACAAGCC	0.107143	FALSE	TRBV9*01		TRBJ2-3*01	ASSVVASSPDTQY	CASSVVASSPDTQYF
KW11	Pat_208	CCCAATCCAGACGCCT	0.0819672	FALSE	TRBV6-5*01	TRBD1*01	TRBJ2-7*01	ASSYGGSYEQY	CASSYGGSYEQYF
KW11	Pat_208	AGCCTAAGTATCTGCA	0.0481928	FALSE	TRBV6-5*01	TRBD1*01	TRBJ2-7*01	ASSYGGSYEQY	CASSYGGSYEQYF
KW11	Pat_208	GGACAGACATTGGGCC	0.0423077	FALSE	TRBV6-5*01	TRBD1*01	TRBJ2-7*01	ASSYGGSYEQY	CASSYGGSYEQYF
KW11	Pat_208	CTACCCAGTATAATGG	0.0382979	FALSE	TRBV6-5*01	TRBD1*01	TRBJ2-7*01	ASSYGGSYEQY	CASSYGGSYEQYF
KW11	Pat_208	CCTCTGAAGGCACATG	0.127962	TRUE	TRBV6-6*03	TRBD1*01	TRBJ2-7*01	ASRPGQYYEQY	CASRPGQYYEQYF
KW11	Pat_208	AACCATGGTTGTCGCG	0.40201	TRUE	TRBV10-2*01	TRBD1*01	TRBJ2-3*01	ASRTGAADTQY	CASRTGAADTQYF
KW11	Pat_208	CTAACTTAGGTAGCCA	0.120805	TRUE	TRBV6-6*01	TRBD1*01	TRBJ1-1*01	ASRTRDSLPNTEAF	CASRTRDSLPNTEAFF
KW11	Pat_208	CATCGAAGTAAGAGAG	0.168539	TRUE	TRBV9*01	TRBD2*02	TRBJ2-7*01	ASSALGGVPSDEQY	CASSALGGVPSDEQYF
KW11	Pat_208	CCATGTCGTATAAACG	0.163934	TRUE	TRBV9*01	TRBD1*01	TRBJ2-1*01	ASSATDSYNEQF	CASSATDSYNEQFF
KW11	Pat_208	CTGAAGTTCACAATGC	0.16129	TRUE	TRBV7-9*03	TRBD2*02	TRBJ1-2*01	ASSFSDQEGYGYT	CASSFSDQEGYGYTF
KW11	Pat_208	AGTTGGTGTACTCAAC	0.168539	TRUE	TRBV7-9*03		TRBJ1-3*01	ASSLDRVIGSGNTIY	CASSLDRVIGSGNTIYF
KW11	Pat_208	ATCGAGTCATCTATGG	0.119816	TRUE	TRBV6-6*03		TRBJ1-1*01	ASSLGLYTEAF	CASSLGLYTEAFF
KW11	Pat_208	ATCCGAAGTCCAGTTA	0.280576	TRUE	TRBV5-1*01	TRBD1*01	TRBJ2-7*01	ASSLGPGQGYEQY	CASSLGPGQGYEQYF
KW11	Pat_208	CAAGAAAAGGACAGCT	0.245033	TRUE	TRBV6-5*01	TRBD2*02	TRBJ1-2*01	ASSPRGGYGYT	CASSPRGGYGYTF
KW11	Pat_208	TTATGCTTCGAGAGCA	0.134831	TRUE	TRBV7-9*03	TRBD2*02	TRBJ2-5*01	ASSPSLGGETQY	CASSPSLGGETQYF
KW11	Pat_208	GACCAATCAATGACCT	0.167832	TRUE	TRBV4-1*01		TRBJ2-7*01	ASSQGQSTYEQY	CASSQGQSTYEQYF
KW11	Pat_208	GGGAATGCACACGCTG	0.162791	TRUE	TRBV4-2*01	TRBD2*01	TRBJ2-3*01	ASSSTQRGVSTDTQY	CASSSTQRGVSTDTQYF
KW11	Pat_208	CCTACCACACACATGT	0.525253	TRUE	TRBV5-5*01		TRBJ2-7*01	ASSWTSSYEQY	CASSWTSSYEQYF
KW11	Pat_208	ACGAGGACATACGCCG	0.207407	TRUE	TRBV6-5*01	TRBD1*01	TRBJ2-5*01	ASSYLDRGKQRQY	CASSYLDRGKQRQYF
TW10	Pat_208	CGATGGCAGTTTGCGT	0.030303	FALSE	TRBV5-1*01	TRBD1*01	TRBJ1-6*02	ASSLEGAKSPLH	CASSLEGAKSPLHF
TW10	Pat_208	GTAACTGCATTATCTC	0.0326087	FALSE	TRBV2*01	TRBD1*01	TRBJ2-1*01	ASSLFTGDEQF	CASSLFTGDEQFF
TW10	Pat_208	ACGATGTCATCGTCGG	0.0330579	FALSE	TRBV5-4*01	TRBD1*01	TRBJ2-2*01	ASSLRGHTGELF	CASSLRGHTGELFF
TW10	Pat_208	GTCGTAAAGGATGCGT	0.0228571	FALSE	TRBV7-3*01	TRBD2*02	TRBJ1-2*01	ASSQGGDYGYT	CASSQGGDYGYTF
IW9	Pat_267	GTCAAGTCATAGTAAG	0.0728477	FALSE	TRBV10-2*01	TRBD1*01	TRBJ2-1*01	ASSESGTGGRNEQF	CASSESGTGGRNEQFF
IW9	Pat_267	CATATTCTCGTAGGAG	0.692308	TRUE	TRBV6-1*01		TRBJ1-1*01	ASSEEISLNTEAF	CASSEEISLNTEAFF
KW11	Pat_267	TATCTCACAACGCACC	0.293651	FALSE	TRBV6-1*01		TRBJ2-1*01	ASSEEIALNNEQF	CASSEEIALNNEQFF
KW11	Pat_267	CACATAGGTCAGCTAT	0.363636	FALSE	TRBV3-1*01		TRBJ1-1*01	ASSEEISLNTEAF	CASSEEISLNTEAFF
KW11	Pat_267	AGTCTTTCACTACAGT	0.876923	FALSE	TRBV7-9*03		TRBJ2-5*01	ASSLEAQTQY	CASSLEAQTQYF
KW11	Pat_267	GCGCAGTCAGTATGCT	1.38281	TRUE	TRBV4-1*01	TRBD2*02	TRBJ1-1*01	ASSPSVGSTEAF	CASSPSVGSTEAFF
KW11	Pat_267	GACGTGCGTTTAGGAA	2.64865	TRUE	TRBV15*02	TRBD1*01	TRBJ2-3*01	ATQEGDSVTDTQY	CATQEGDSVTDTQYF
TW10	Pat_267	GCTGCAGCATCCCATC	0.207547	FALSE	TRBV2*01	TRBD1*01	TRBJ2-3*01	ASSEGTASTDTQY	CASSEGTASTDTQYF
TW10	Pat_267	AACACGTCAGGCGATA	0.222222	FALSE	TRBV4-1*01	TRBD1*01	TRBJ2-7*01	ASSRLQGALYEQY	CASSRLQGALYEQYF
IW9	Pat_309	CTAACTTCATTTGCTT	0.0656566	FALSE	TRBV5-1*01		TRBJ1-1*01	ASSTNQNTEAF	CASSTNQNTEAFF
IW9	Pat_309	CCAGCGACATTGGTAC	0.152344	TRUE	TRBV10-3*02	TRBD2*02	TRBJ2-7*01	AISEPSLEHSLNEQY	CAISEPSLEHSLNEQYF
IW9	Pat_309	TAAGTGCAGCGTCAAG	0.294118	TRUE	TRBV5-1*01		TRBJ1-1*01	ASRGNMNTEAF	CASRGNMNTEAFF
IW9	Pat_309	CCCTCCTAGTTGTAGA	0.0943396	TRUE	TRBV5-1*01		TRBJ1-1*01	ASSANMNTEAF	CASSANMNTEAFF
IW9	Pat_309	GCATACATCGGTGTCG	0.133721	TRUE	TRBV5-1*01		TRBJ1-1*01	ASSYNRNTEAF	CASSYNRNTEAFF
KW11	Pat_309	CGAGAAGCATCACGTA	0.0243902	FALSE	TRBV5-1*01		TRBJ1-1*01	ASKSNQNTEAF	CASKSNQNTEAFF
KW11	Pat_309	GCTTGAAAGTACGCCC	0.0769231	FALSE	TRBV7-2*02	TRBD2*01	TRBJ2-7*01	ASSFGLAGTYEQY	CASSFGLAGTYEQYF
KW11	Pat_309	GTGCAGCTCTCCTATA	0.0457747	FALSE	TRBV3-1*01	TRBD2*02	TRBJ1-2*01	ASSHDGTNYGYT	CASSHDGTNYGYTF
KW11	Pat_309	GGCTGGTGTCATGCCG	0.0658228	FALSE	TRBV11-1*01	TRBD1*01	TRBJ2-7*01	ASSLGSGSEQY	CASSLGSGSEQYF
KW11	Pat_309	CGGAGCTAGGCTCTTA	0.0582011	FALSE	TRBV5-1*01		TRBJ1-2*01	ASSLVKELGYT	CASSLVKELGYTF
KW11	Pat_309	AGCATACTCGGCGGTT	0.0630252	FALSE	TRBV7-2*02	TRBD2*02	TRBJ2-7*01	ASSPWTSGTEQY	CASSPWTSGTEQYF
KW11	Pat_309	CTACACCAGTGTGAAT	0.0583658	FALSE	TRBV4-1*01	TRBD1*01	TRBJ2-1*01	ASSQDGEGEDNEQF	CASSQDGEGEDNEQFF
KW11	Pat_309	ATCACGAGTCAATACC	0.0241546	FALSE	TRBV5-1*01	TRBD2*01	TRBJ1-1*01	ASSSGGGAGEAF	CASSSGGGAGEAFF
KW11	Pat_309	GTGCTTCGTCCTGCTT	0.0790514	FALSE	TRBV7-3*01	TRBD1*01	TRBJ1-1*01	ASSSPSGANTEAF	CASSSPSGANTEAFF
KW11	Pat_309	TACTCATTCAGCTCGG	0.0621118	FALSE	TRBV7-3*01	TRBD1*01	TRBJ1-1*01	ASSSPSGANTEAF	CASSSPSGANTEAFF
KW11	Pat_309	TACACGAGTTACTGAC	0.0569476	FALSE	TRBV9*02		TRBJ2-2*01	ASSVYGDTGELF	CASSVYGDTGELFF
KW11	Pat_309	GGAGCAACACATCCAA	0.324022	TRUE	TRBV10-2*01		TRBJ1-2*01	ASRGRNYGYT	CASRGRNYGYTF
KW11	Pat_309	CTTTGCGCAGGGTTAG	0.157754	TRUE	TRBV5-6*01	TRBD2*02	TRBJ2-5*01	ASSATGRGYEETQY	CASSATGRGYEETQYF
KW11	Pat_309	GTGGGTCTCTCAAACG	0.198312	TRUE	TRBV10-1*02	TRBD2*02	TRBJ2-7*01	ASSEGGPPYEQY	CASSEGGPPYEQYF
KW11	Pat_309	AATCGGTAGATAGTCA	0.112903	TRUE	TRBV7-8*01	TRBD2*01	TRBJ2-1*01	ASSLALAGGMWEQF	CASSLALAGGMWEQFF
KW11	Pat_309	CGATTGAGTCCGAATT	0.236364	TRUE	TRBV5-1*01	TRBD2*01	TRBJ1-1*01	ASSLAPGVGTEAF	CASSLAPGVGTEAFF
KW11	Pat_309	TCGAGGCGTTGATTGC	0.294737	TRUE	TRBV7-9*03	TRBD2*01	TRBJ2-2*01	ASSLVGEIGTQRSGDTGELF	CASSLVGEIGTQRSGDTGELFF
KW11	Pat_309	GTCATTTCATGCCACG	0.188034	TRUE	TRBV6-2*01		TRBJ1-1*01	ASSNVGNTEAF	CASSNVGNTEAFF
KW11	Pat_309	TTAGGCACAGCAGTTT	0.251142	TRUE	TRBV4-1*01	TRBD1*01	TRBJ1-5*01	ASSPPLGESINQPQH	CASSPPLGESINQPQHF
KW11	Pat_309	GATCGATAGGCTATCT	0.164502	TRUE	TRBV11-2*01		TRBJ2-7*01	ASSPTSDEQY	CASSPTSDEQYF
KW11	Pat_309	TTCTCCTTCACTTATC	0.103865	TRUE	TRBV4-1*01	TRBD1*01	TRBJ1-5*01	ASSQGTEHSNQPQH	CASSQGTEHSNQPQHF
KW11	Pat_309	GGACAGACATACGCCG	0.0961538	TRUE	TRBV5-5*01	TRBD1*01	TRBJ2-7*01	ASSRGLGRDEQY	CASSRGLGRDEQYF
KW11	Pat_309	CGTCCATGTGGTAACG	0.191235	TRUE	TRBV13*01		TRBJ2-7*01	ASSSRQKPSYEQY	CASSSRQKPSYEQYF
KW11	Pat_309	TCAGCTCTCCTCCTAG	0.135888	TRUE	TRBV9*02		TRBJ2-2*01	ASSVVAIGTGELF	CASSVVAIGTGELFF
KW11	Pat_309	ACTTTCACATGCCCGA	0.0896686	TRUE	TRBV6-5*01		TRBJ1-1*01	ASSYSIRPGEAF	CASSYSIRPGEAFF
KW11	Pat_309	CTGAAACCACATGGGA	0.155932	TRUE	TRBV10-1*02	TRBD1*01	TRBJ2-7*01	ASTHRQDSSYEQY	CASTHRQDSSYEQYF
TW10	Pat_309	GCTGCTTAGTAGCGGT	0.433476	FALSE	TRBV5-1*01		TRBJ1-1*01	ASSANMNTEAF	CASSANMNTEAFF
TW10	Pat_309	CATGACATCTGGCGTG	0.364662	FALSE	TRBV5-1*01		TRBJ1-1*01	ASSANMNTEAF	CASSANMNTEAFF
TW10	Pat_309	GACACGCGTTCGCTAA	0.352071	FALSE	TRBV11-1*01	TRBD2*01	TRBJ2-1*01	ASSLGSGNEQF	CASSLGSGNEQFF
TW10	Pat_309	CGATTGAGTACAGTGG	0.360902	FALSE	TRBV5-1*01		TRBJ2-1*01	ASSSRLEQF	CASSSRLEQFF
TW10	Pat_309	GTCAAGTCATGCCTTC	0.216438	FALSE	TRBV5-1*01		TRBJ2-1*01	ASSSRLEQF	CASSSRLEQFF
TW10	Pat_309	TGTTCCGTCTGTCTAT	0.384106	FALSE	TRBV5-1*01	TRBD1*01	TRBJ2-7*01	ASSSWDNSYEQY	CASSSWDNSYEQYF
TW10	Pat_309	TACTCATAGAAGAAGC	0.351536	FALSE	TRBV5-1*01	TRBD1*01	TRBJ2-7*01	ASSSWDNSYEQY	CASSSWDNSYEQYF
TW10	Pat_309	AGCATACGTGTGACGA	0.363958	FALSE	TRBV5-1*01		TRBJ1-1*01	ASSTNQNTEAF	CASSTNQNTEAFF
IW9	Pat_453	TCACGAAAGATGTAAC	0.0292887	FALSE	TRBV10-1*01	TRBD1*01	TRBJ2-3*01	ASSDSEGTGPRRNTDTQY	CASSDSEGTGPRRNTDTQYF
IW9	Pat_453	GGCCGATAGATATGCA	0.0348837	FALSE	TRBV10-2*01	TRBD2*01	TRBJ2-1*01	ASSESLNGGGPYNEQF	CASSESLNGGGPYNEQFF
IW9	Pat_453	CAGCATAAGGCAATTA	0.0338983	FALSE	TRBV11-2*01	TRBD1*01	TRBJ2-4*01	ASSLGAGKDIQY	CASSLGAGKDIQYF
IW9	Pat_453	CTCACACCAAGTCATC	0.0320513	FALSE	TRBV9*01	TRBD2*01	TRBJ1-2*01	ASSVGGDDYGYT	CASSVGGDDYGYTF
KW11	Pat_453	AAGGCAGAGACATAAC	0.00758325	FALSE	TRBV6-5*01	TRBD2*01	TRBJ2-3*01	ASRGTSGEDTQY	CASRGTSGEDTQYF
KW11	Pat_453	GCAGTTATCACAGGCC	0.198718	FALSE	TRBV2*01	TRBD1*01	TRBJ1-2*01	ASSEEQGVHGYT	CASSEEQGVHGYTF
KW11	Pat_453	GGCTCGAAGATCTGAA	0.106122	FALSE	TRBV7-2*02	TRBD1*01	TRBJ2-4*01	ASSFAGTTKNIQY	CASSFAGTTKNIQYF
KW11	Pat_453	GTGTTAGTCAACACGT	0.0944056	FALSE	TRBV13*01		TRBJ1-1*01	ASSFYNTEAF	CASSFYNTEAFF
KW11	Pat_453	GCATGTAAGTAGCGGT	0.0689655	FALSE	TRBV4-1*01	TRBD2*02	TRBJ1-2*01	ASSNGISSNYGYT	CASSNGISSNYGYTF
KW11	Pat_453	GTCACAAGTACTTAGC	0.162963	FALSE	TRBV7-9*03	TRBD2*01	TRBJ2-1*01	ASSPGVKLAGDRSYNEQF	CASSPGVKLAGDRSYNEQFF
KW11	Pat_453	TAAGAGACAACTGCTA	0.186567	FALSE	TRBV13*01	TRBD2*01	TRBJ2-3*01	ASSSSDPAWGGGAHSLTDTQY	CASSSSDPAWGGGAHSLTDTQYF
KW11	Pat_453	CCAATCCTCTTTCCTC	0.084058	FALSE	TRBV7-6*01	TRBD1*01	TRBJ2-3*01	ASSWGTGTDTQY	CASSWGTGTDTQYF
KW11	Pat_453	GCGAGAAGTCATGCAT	0.152439	FALSE	TRBV6-5*01	TRBD2*01	TRBJ2-7*01	ASSYRGAYEQY	CASSYRGAYEQYF
KW11	Pat_453	TGGCGCATCGAACGGA	0.195652	FALSE	TRBV6-5*01	TRBD1*01	TRBJ1-1*01	ASSYSVQGGEAF	CASSYSVQGGEAFF
KW11	Pat_453	GTGCTTCAGCGCTTAT	0.212329	TRUE	TRBV6-6*01	TRBD2*01	TRBJ2-1*01	ASRLAGAGAYNEQF	CASRLAGAGAYNEQFF
KW11	Pat_453	CTACCCAGTCTCATCC	0.289157	TRUE	TRBV6-1*01	TRBD2*02	TRBJ2-2*01	ASSAGGGTGELF	CASSAGGGTGELFF
KW11	Pat_453	CTAATGGGTTGGACCC	0.233645	TRUE	TRBV5-6*01		TRBJ1-3*01	ASSLGASGNTIY	CASSLGASGNTIYF
KW11	Pat_453	CAGCAGCTCCGCTGTT	0.243056	TRUE	TRBV4-1*01		TRBJ2-7*01	ASSQVISTGTYEQY	CASSQVISTGTYEQYF
KW11	Pat_453	CATGGCGTCAGTTAGC	0.235023	TRUE	TRBV6-5*01	TRBD1*01	TRBJ1-5*01	ASSRTGAINQPQH	CASSRTGAINQPQHF
KW11	Pat_453	TCAGGTAGTTAAAGAC	0.285714	TRUE	TRBV9*01	TRBD2*01	TRBJ2-5*01	ASSWTSGGPRETQY	CASSWTSGGPRETQYF
KW11	Pat_453	ACACCGGGTGCAGGTA	0.205882	TRUE	TRBV6-5*01	TRBD1*01	TRBJ1-1*01	ASSYGVRGSNTEAF	CASSYGVRGSNTEAFF
KW11	Pat_453	TGCCAAATCAGCTCGG	0.360825	TRUE	TRBV5-6*01	TRBD1*01	TRBJ2-5*01	ASSYRTRETQY	CASSYRTRETQYF
KW11	Pat_453	ACGGGTCCAATGTTGC	0.258621	TRUE	TRBV20-1*01	TRBD2*01	TRBJ2-7*01	SARLGWGVAREQY	CSARLGWGVAREQYF
TW10	Pat_453	TGAGCCGAGAGATGAG	0.0272374	FALSE	TRBV13*01	TRBD2*01	TRBJ2-3*01	ASSQRGGSTDTQY	CASSQRGGSTDTQYF
TW10	Pat_453	ACGTCAATCAACGGCC	0.0230415	FALSE	TRBV9*01		TRBJ2-1*01	ASSSNGAYDDEQF	CASSSNGAYDDEQFF
IW9	Pat_726	GCATACAAGCGTAGTG	1.2	FALSE	TRBV10-2*01	TRBD2*01	TRBJ2-5*01	ASGGNSEGETQY	CASGGNSEGETQYF
IW9	Pat_726	ACGATGTCAGTCGATT	0.633333	FALSE	TRBV7-9*03	TRBD2*02	TRBJ1-1*01	ASRGGGTEAF	CASRGGGTEAFF
IW9	Pat_726	CTCGGAGAGCACCGCT	0.642857	FALSE	TRBV2*01		TRBJ1-2*01	ASSEGARDYGYT	CASSEGARDYGYTF
IW9	Pat_726	AACTGGTTCACCCGAG	0.823529	FALSE	TRBV4-1*01	TRBD1*01	TRBJ1-1*01	ASSLEVGAGLGAEAF	CASSLEVGAGLGAEAFF
IW9	Pat_726	CGACCTTTCACAATGC	1	FALSE	TRBV7-9*03	TRBD1*01	TRBJ2-1*01	ASSLGGKATWQF	CASSLGGKATWQFF
IW9	Pat_726	GGCAATTGTCCAGTGC	0.882353	FALSE	TRBV7-9*03	TRBD2*01	TRBJ2-7*01	ASSPLAGGNEQY	CASSPLAGGNEQYF
IW9	Pat_726	ATCACGATCCAGTATG	0.541667	FALSE	TRBV9*01	TRBD1*01	TRBJ2-7*01	ASSPPGTPSYEQY	CASSPPGTPSYEQYF
IW9	Pat_726	CCACCTAAGATGGGTC	0.782609	FALSE	TRBV4-1*01	TRBD2*01	TRBJ2-2*01	ASSQEAPAGNTGELF	CASSQEAPAGNTGELFF
IW9	Pat_726	GGCAATTCAACACGCC	0.8	FALSE	TRBV4-1*01	TRBD2*02	TRBJ1-5*01	ASSQEGEDNQPQH	CASSQEGEDNQPQHF
IW9	Pat_726	CGTTAGACAACAACCT	0.65	FALSE	TRBV4-1*01		TRBJ2-2*01	ASSQLQTTGELF	CASSQLQTTGELFF
IW9	Pat_726	TTCCCAGCAGATGGCA	1	FALSE	TRBV9*02	TRBD2*01	TRBJ2-2*01	ASSVELADYTGELF	CASSVELADYTGELFF
IW9	Pat_726	GGAAAGCAGCTGCGAA	1.13333	FALSE	TRBV6-6*01		TRBJ2-3*01	ASSYRPDTQY	CASSYRPDTQYF
IW9	Pat_726	ACAGCCGAGCTCCTTC	0.59375	FALSE	TRBV6-5*01	TRBD1*01	TRBJ2-1*01	ASSYSGHEQF	CASSYSGHEQFF
IW9	Pat_726	GTACTCCTCTCAACTT	0.7	FALSE	TRBV6-5*01	TRBD2*01	TRBJ2-5*01	ASSYVAGGPGETQY	CASSYVAGGPGETQYF
IW9	Pat_726	AGCGTATGTTTAGCTG	1.2	FALSE	TRBV6-6*01	TRBD1*01	TRBJ1-1*01	ASTGNTEAF	CASTGNTEAFF
IW9	Pat_726	GGGATGAGTTGTCTTT	1.1	FALSE	TRBV13*01	TRBD1*01	TRBJ1-2*01	ASTPGSGGYT	CASTPGSGGYTF
IW9	Pat_726	TCGCGTTTCCTCATTA	1.45455	TRUE	TRBV9*02	TRBD1*01	TRBJ1-2*01	ASSGQGQGGYGYT	CASSGQGQGGYGYTF
IW9	Pat_726	CAGTCCTCATGCCTTC	2.5	TRUE	TRBV10-2*02	TRBD2*02	TRBJ1-2*01	ASSISALEGGYT	CASSISALEGGYTF
IW9	Pat_726	TTCTACACACTGTCGG	1.75	TRUE	TRBV7-9*03		TRBJ2-5*01	ASSLVQETQY	CASSLVQETQYF
IW9	Pat_726	TAAGAGAAGATCCTGT	3.76923	TRUE	TRBV3-1*01		TRBJ1-1*01	ASSQDEWVNTEAF	CASSQDEWVNTEAFF
IW9	Pat_726	ATGGGAGCACAGTCGC	2	TRUE	TRBV4-1*01	TRBD2*01	TRBJ1-6*02	ASSQDPGNSNSPLH	CASSQDPGNSNSPLHF
IW9	Pat_726	TAGGCATCATGAACCT	1.84615	TRUE	TRBV7-8*01	TRBD1*01	TRBJ1-4*01	ASSQEGTGGEKLF	CASSQEGTGGEKLFF
IW9	Pat_726	CTCGTACTCGTAGATC	1.45455	TRUE	TRBV4-1*01	TRBD1*01	TRBJ1-4*01	ASSQTDRGTNEKLF	CASSQTDRGTNEKLFF
IW9	Pat_726	AATCCAGAGTCCGGTC	5.28571	TRUE	TRBV3-1*01	TRBD1*01	TRBJ1-1*01	ASSQVRGDLNTEAF	CASSQVRGDLNTEAFF
IW9	Pat_726	CTGATCCCAAACAACA	1.21739	TRUE	TRBV2*01	TRBD2*02	TRBJ2-7*01	ASSRGQDEQY	CASSRGQDEQYF
IW9	Pat_726	GCTGCTTGTCACCCAG	1.45455	TRUE	TRBV4-1*01	TRBD2*01	TRBJ2-1*01	ASSSDSSSYNEQF	CASSSDSSSYNEQFF
IW9	Pat_726	GTCACAAAGATCACGG	1.3125	TRUE	TRBV9*01	TRBD1*01	TRBJ2-2*01	ASSVGQGGAGELF	CASSVGQGGAGELFF
IW9	Pat_726	GTATTCTCAAACCCAT	2.375	TRUE	TRBV6-5*01	TRBD2*01	TRBJ2-1*01	ASSYFPGWDNEQF	CASSYFPGWDNEQFF
IW9	Pat_726	TCATTTGGTGAGGGAG	1.33333	TRUE	TRBV6-1*01	TRBD1*01	TRBJ2-3*01	ASWRWGTDTQY	CASWRWGTDTQYF
IW9	Pat_726	TTATGCTGTTCAGCGC	1.66667	TRUE	TRBV5-5*02		TRBJ2-3*01	ATLGGDTQY	CATLGGDTQYF
KW11	Pat_726	CTCGTACTCTTGTCAT	5.21429	FALSE	TRBV6-4*02	TRBD1*01	TRBJ2-7*02	ASRRLGGPYEQY	CASRRLGGPYEQYV
KW11	Pat_726	GTCCTCAGTGTTAAGA	5.21429	FALSE	TRBV10-2*01	TRBD2*01	TRBJ2-1*01	ASRSGYSSYNEQF	CASRSGYSSYNEQFF
KW11	Pat_726	TCTTTCCAGAATGTTG	3.61905	FALSE	TRBV6-2*01	TRBD1*01	TRBJ2-6*01	ASSAGIGANVLT	CASSAGIGANVLTF
KW11	Pat_726	GCAGTTACAGGATTGG	3.22727	FALSE	TRBV9*01		TRBJ2-6*01	ASSEGSSGANVLT	CASSEGSSGANVLTF
KW11	Pat_726	CTGCGGAGTCTCACCT	4.36842	FALSE	TRBV7-9*03	TRBD2*01	TRBJ2-1*01	ASSFSGANYNEQF	CASSFSGANYNEQFF
KW11	Pat_726	GTTACAGCAATGGTCT	3.33333	FALSE	TRBV5-1*01		TRBJ2-7*01	ASSLEGQDYEQY	CASSLEGQDYEQYF
KW11	Pat_726	CTCGGAGGTCGTTGTA	3.41667	FALSE	TRBV5-1*01	TRBD1*01	TRBJ2-5*01	ASSLPGQALPYQETQY	CASSLPGQALPYQETQYF
KW11	Pat_726	AACTGGTTCCACGTTC	5.05882	FALSE	TRBV5-6*01		TRBJ2-5*01	ASSLVPSEETQY	CASSLVPSEETQYF
KW11	Pat_726	GCTGCGATCATACGGT	2.93939	FALSE	TRBV4-2*01		TRBJ2-7*01	ASSQDPKGPTEQY	CASSQDPKGPTEQYF
KW11	Pat_726	TATCAGGTCTCAACTT	2.27027	FALSE	TRBV7-6*01	TRBD1*01	TRBJ1-1*01	ASSRQGASTEAF	CASSRQGASTEAFF
KW11	Pat_726	GCGAGAAGTCTAGTGT	5.36364	FALSE	TRBV7-9*03		TRBJ1-1*01	ASSSGSTEAF	CASSSGSTEAFF
KW11	Pat_726	CGTTGGGGTGTATGGG	3.0303	FALSE	TRBV6-5*01	TRBD1*01	TRBJ1-1*01	ASSSSLNGQGALNTEAF	CASSSSLNGQGALNTEAFF
KW11	Pat_726	TGCTGCTTCTGTGCAA	5.03448	FALSE	TRBV7-6*01		TRBJ2-1*01	ASSTHNEQF	CASSTHNEQFF
KW11	Pat_726	CTCTGGTAGCCAGTTT	3.57143	FALSE	TRBV7-9*03	TRBD1*01	TRBJ2-3*01	ASSVRQGGDSDTQY	CASSVRQGGDSDTQYF
KW11	Pat_726	TATTACCCAATCCGAT	1.8	FALSE	TRBV13*01	TRBD2*01	TRBJ1-5*01	ASSWTSGGGSNQPQH	CASSWTSGGGSNQPQHF
KW11	Pat_726	AGAGCTTCAGAGCCAA	4.91667	FALSE	TRBV7-9*03		TRBJ2-2*01	ATPIMMRELF	CATPIMMRELFF
KW11	Pat_726	GCGAGAAAGGGTGTTG	4.4375	FALSE	TRBV29-1*01	TRBD1*01	TRBJ2-7*01	SAAGTGLSYEQY	CSAAGTGLSYEQYF
KW11	Pat_726	ACGAGGATCATGTCCC	7.88889	TRUE	TRBV5-1*01	TRBD2*01	TRBJ1-1*01	ASADRGGSTEAF	CASADRGGSTEAFF
KW11	Pat_726	TCTTTCCGTCTAAAGA	8	TRUE	TRBV6-5*01	TRBD1*01	TRBJ2-1*01	ASMGTVYNEQF	CASMGTVYNEQFF
KW11	Pat_726	ACTGATGGTCCGCTGA	5.73333	TRUE	TRBV7-9*03	TRBD1*01	TRBJ1-4*01	ASRPGQSLNEKLF	CASRPGQSLNEKLFF
KW11	Pat_726	TTTGTCAGTGCTAGCC	6.33333	TRUE	TRBV6-2*01	TRBD2*01	TRBJ2-3*01	ASSEERGNTDTQY	CASSEERGNTDTQYF
KW11	Pat_726	GGAATAAAGAGAGCTC	11.6667	TRUE	TRBV10-1*01	TRBD1*01	TRBJ1-6*02	ASSEFRQGIFWGQRPD	CASSEFRQGIFWGQRPDF
KW11	Pat_726	AATCCAGAGTTCCACA	9.36364	TRUE	TRBV6-4*02		TRBJ2-4*01	ASSGDPFNIQY	CASSGDPFNIQYF
KW11	Pat_726	CGTTCTGTCAAGGTAA	10.2	TRUE	TRBV7-8*01	TRBD1*01	TRBJ1-1*01	ASSIDTGDPEAF	CASSIDTGDPEAFF
KW11	Pat_726	TGGTTAGTCCACGTGG	6.2	TRUE	TRBV5-4*01	TRBD2*01	TRBJ1-2*01	ASSLEGGMSYGYT	CASSLEGGMSYGYTF
KW11	Pat_726	ACCAGTAGTCCTGCTT	8.66667	TRUE	TRBV5-1*01	TRBD1*01	TRBJ1-2*01	ASSLSGANGYT	CASSLSGANGYTF
KW11	Pat_726	GTACGTAAGTGTCCCG	6.06667	TRUE	TRBV7-8*01		TRBJ1-1*01	ASSLTDDTEAF	CASSLTDDTEAFF
KW11	Pat_726	CATCGGGCATCAGTAC	5.92857	TRUE	TRBV4-1*01		TRBJ1-6*02	ASSQDGLSSYNSPLH	CASSQDGLSSYNSPLHF
KW11	Pat_726	GTTCATTGTATAATGG	8.36364	TRUE	TRBV13*01	TRBD2*01	TRBJ2-5*01	ASSSEEAGEETQY	CASSSEEAGEETQYF
KW11	Pat_726	TACGGATTCTTGGGTA	7.5	TRUE	TRBV6-5*01		TRBJ2-2*01	ASSSLRSSSPTTGELF	CASSSLRSSSPTTGELFF
KW11	Pat_726	TTAGGCATCATACGGT	6.04	TRUE	TRBV4-1*01	TRBD2*01	TRBJ2-5*01	ASSVGSSGVGQY	CASSVGSSGVGQYF
KW11	Pat_726	GCTGCTTCATGGTAGG	5.53333	TRUE	TRBV6-6*01		TRBJ1-1*01	ASSYSGKWF	CASSYSGKWFF
KW11	Pat_726	CAACTAGGTATCACCA	7.83333	TRUE	TRBV6-5*01	TRBD2*01	TRBJ1-1*01	ASTPGGMRTEAF	CASTPGGMRTEAFF
KW11	Pat_726	ACAGCTATCGCCGTGA	14.3333	TRUE	TRBV29-1*01	TRBD1*01	TRBJ2-1*01	SVVGQGNNEQF	CSVVGQGNNEQFF
TW10	Pat_726	CACAAACAGAGGGCTT	0.545455	FALSE	TRBV5-4*01	TRBD1*01	TRBJ1-1*01	ASSLFGGQMNTEAF	CASSLFGGQMNTEAFF
TW10	Pat_726	CACCAGGTCCGAAGAG	0.5	FALSE	TRBV4-2*01		TRBJ2-2*01	ASSPPGFGNAGELF	CASSPPGFGNAGELFF
TW10	Pat_726	CCGGTAGCATTGAGCT	0.411765	FALSE	TRBV4-1*01	TRBD1*01	TRBJ1-1*01	ASSPRQGRDTEAF	CASSPRQGRDTEAFF
TW10	Pat_726	ATCTACTAGAAGCCCA	0.315789	FALSE	TRBV4-1*01	TRBD1*01	TRBJ2-7*02	ASSQATGAPYEQY	CASSQATGAPYEQYV
TW10	Pat_726	TCACGAATCCCTTGCA	0.448276	FALSE	TRBV9*02	TRBD1*01	TRBJ2-2*01	ASSSNQGANTGELF	CASSSNQGANTGELFF
KW11	Pat1401	AACTTTCAGTGTCCAT	1.67368	TRUE	TRBV6-5*01		TRBJ2-3*01	CASSPPGAPDTQYF
KW11	Pat1401	ACGCCGAAGCAATCTC	0.388186	FALSE	TRBV4-3*01		TRBJ2-1*01	CASSPLDGSYNEQFF
KW11	Pat1401	ATGAGGGGTTACCAGT	1.26582	TRUE	TRBV7-9*03	TRBD1*01	TRBJ2-1*01	CASSLDSTAHNEQFF
KW11	Pat1401	CAACCTCGTATGCTTG	0.910714	FALSE	TRBV6-2*01		TRBJ2-2*01	CASSYSHVTGELFF
KW11	Pat1401	CACATTTAGTTACGGG	1.67273	TRUE	TRBV7-9*03	TRBD1*01	TRBJ2-5*01	CASSPLGNEETQYF
KW11	Pat1401	CACCTTGCACACATGT	1.28767	TRUE	TRBV6-5*01	TRBD2*01	TRBJ1-1*01	CASSYSPGSEAFF
KW11	Pat1401	CCGTGGAAGGCATTGG	2.13462	TRUE	TRBV7-9*01		TRBJ2-2*01	CASSLNLRGTGELFF
KW11	Pat1401	CCTCAGTGTACCATCA	0.372414	FALSE	TRBV9*01	TRBD1*01	TRBJ1-4*01	CASSAGRQGNEKLFF
KW11	Pat1401	CCTTCCCAGATCACGG	0.328877	FALSE	TRBV7-9*03	TRBD2*01	TRBJ1-2*01	CASSSSGDNYGYTF
KW11	Pat1401	GAACCTACAACCGCCA	2.11111	TRUE	TRBV7-9*03	TRBD1*01	TRBJ2-3*01	CASSPPGQSTDTQYF
KW11	Pat1401	GATCAGTGTTGCGCAC	2.93478	TRUE	TRBV4-1*01	TRBD2*02	TRBJ1-5*01	CASSQDPGQPQHF
KW11	Pat1401	GCAATCAGTCAACATC	1.6875	TRUE	TRBV7-9*01		TRBJ2-1*01	CASSSSADHRNEQFF
KW11	Pat1401	GGACGTCCACATAACC	0.434447	FALSE	TRBV6-6*02	TRBD1*01	TRBJ1-6*02	CASSSGTASSYNSPLHF
KW11	Pat1401	GTGAAGGCACCAACCG	1.25	FALSE	TRBV9*01		TRBJ2-6*01	CASSVSSDSGANVLTF
KW11	Pat1401	TACAGTGAGGCTCATT	0.9	FALSE	TRBV7-3*01		TRBJ2-2*01	CASSLGVKGELFF
KW11	Pat1401	TACTCGCCAGACACTT	1.0099	FALSE	TRBV4-1*01		TRBJ2-7*01	CASSHDLTHYEQYF
KW11	Pat1401	TATTACCAGGGATCTG	0.847561	FALSE	TRBV7-2*01	TRBD1*01	TRBJ2-5*01	CASSLRPGTLGEETQYF
KW11	Pat1401	TCTTTCCTCTGCAGTA	0.709924	FALSE	TRBV5-6*01	TRBD1*01	TRBJ2-1*01	CASSLSGQGARIYNEQFF
KW11	Pat1401	TGACGGCTCCTTTACA	0.605263	FALSE	TRBV7-9*03	TRBD1*01	TRBJ1-1*01	CASSPTGAPGTEAFF
KW11	Pat1401	TGCTGCTGTGTCGCTG	2.85484	TRUE	TRBV7-6*01	TRBD2*01	TRBJ2-1*01	CASSTAPSGSSYNEQFF
KW11	Pat272	GCGCCAACATGCTGGC	1.24074	TRUE	TRBV9*01	TRBD1*01	TRBJ1-4*01	CASSVNRGGEKLFF
KW11	Pat272	GGACATTTCGTGACAT	0.428571	FALSE	TRBV11-2*01	TRBD1*01	TRBJ2-1*01	CASSLAGTGGYLSSYNEQFF
KW11	Pat272	GGATTACCATCAGTAC	1.7037	TRUE	TRBV4-1*01		TRBJ1-1*01	CASSHRATEAFF
KW11	Pat272	GGGTCTGTCAACGGGA	0.890052	TRUE	TRBV10-1*01		TRBJ2-7*01	CASSGPQNPYEQYF
KW11	Pat272	GTGAAGGGTACCGCTG	0.353952	FALSE	TRBV7-9*03	TRBD2*02	TRBJ2-1*01	CASSLFSGVDEQFF
KW11	Pat272	TACGGGCTCATTTGGG	0.595092	FALSE	TRBV5-1*01	TRBD2*01	TRBJ2-7*01	CASSLVAGTNEQYF
IW9	Pat272	TTCCCAGTCGGAATCT	0.0346535	TRUE	TRBV7-8*01		TRBJ1-1*01	CASSLMNSEAFF
KW11	Pat272	TTCTTAGCATCGGACC	1.00885	TRUE	TRBV7-3*01		TRBJ2-2*01	CASSLTAYVRPAELFF
KW11	Pat272	TTTGGTTAGACTAAGT	0.531579	FALSE	TRBV7-7*01	TRBD2*01	TRBJ1-1*01	CASSPGLGSEAFF
KW11	Pat272	AACGTTGTCGGTGTTA	0.502183	FALSE	TRBV13*01	TRBD1*01	TRBJ1-1*01	CASSDGQGLGRSTEAFF
TW10	Pat1401	ACAGCCGCATCGGAAG	0.10828	FALSE	TRBV7-3*01	TRBD2*01	TRBJ2-2*01	CASSLLGGNTGELFF
TW10	Pat272	ACGCCAGCAGCCTTTC	0.0502283	FALSE	TRBV7-8*01	TRBD1*01	TRBJ1-1*01	CASSLDRAPEAFF
IW9	Pat272	ACTGAACGTCATTAGC	0.0833333	TRUE	TRBV4-1*01	TRBD1*01	TRBJ2-7*01	CASSQGGEQYF
KW11	Pat272	AGAGCGATCAAGATCC	0.535519	FALSE	TRBV11-2*01		TRBJ2-2*01	CASSLDPVLEYDTGELFF
KW11	Pat272	AGAGCTTGTAGCGTGA	1	TRUE	TRBV7-6*01		TRBJ2-1*01	CASSLDRNSYNEQFF
IW9	Pat1401	AGAGCTTGTCAATACC	0.546154	TRUE	TRBV7-3*01	TRBD2*01	TRBJ2-6*01	CASSLGGTGANVLTF
KW11	Pat272	AGCATACCAGATGGCA	0.689024	TRUE	TRBV4-2*01	TRBD2*01	TRBJ2-6*01	CASSQGGTSGGRSGANVLTF
KW11	Pat272	ATAGACCCATCCAACA	1.49359	TRUE	TRBV5-1*01	TRBD2*01	TRBJ2-5*01	CASSLVPSGGPLQETQYF
KW11	Pat272	ATCACGAAGGAGTTGC	0.535354	FALSE	TRBV5-1*01	TRBD2*02	TRBJ2-1*01	CASSPSGSGSYNEQFF
KW11	Pat272	ATCCGAACAGCTCGAC	1.45522	TRUE	TRBV13*01	TRBD1*01	TRBJ1-2*01	CASSQTGANYGYTF
KW11	Pat272	ATGAGGGCAATGAAAC	0.471204	FALSE	TRBV7-9*03	TRBD1*01	TRBJ2-7*01	CASSAPDRGDYEQYF
KW11	Pat272	ATTGGTGCACGCGAAA	1.01481	TRUE	TRBV13*01	TRBD2*01	TRBJ2-3*01	CASSPHSGGASTDTQYF
KW11	Pat272	CACCAGGTCAATACCG	0.803279	TRUE	TRBV7-9*03	TRBD1*01	TRBJ2-3*01	CASSITGFTDTQYF
KW11	Pat272	CACCTTGGTAAACACA	0.416357	FALSE	TRBV7-9*01		TRBJ1-1*01	CASSPVNTEAFF
KW11	Pat272	CAGCTAATCCTAAGTG	0.577259	FALSE	TRBV7-9*03		TRBJ2-7*01	CASSLAKGDPYEQYF
KW11	Pat272	CATCAGATCAGTTAGC	0.928571	TRUE	TRBV7-9*01	TRBD1*01	TRBJ2-5*01	CASSSNQGETRETQYF
KW11	Pat272	CATTCGCGTCAACTGT	0.537688	FALSE	TRBV7-2*02	TRBD2*01	TRBJ2-3*01	CASSQISGGSATQYF
KW11	Pat1401	CCAATCCAGTATCGAA	2.5	TRUE	TRBV7-9*01		TRBJ2-1*01	CASSSSADHRNEQFF
KW11	Pat272	CCACGGAAGATAGCAT	0.490566	FALSE	TRBV7-3*01	TRBD1*01	TRBJ1-2*01	CASSLTGTGNYGYTF
IW9	Pat1401	CCTACCAAGGTAAACT	0.203883	TRUE	TRBV5-1*01	TRBD1*01	TRBJ1-1*01	CASRQGGNTEAFF
KW11	Pat272	CGAGCACTCATGTCTT	0.420849	FALSE	TRBV10-2*01		TRBJ2-3*01	CASSWDTDTQYF
IW9	Pat272	CGCTTCATCTTACCTA	0.00343643	FALSE	TRBV6-5*01		TRBJ2-7*01	CASSYGYSESYEQYF
IW9	Pat1401	CGGACGTTCGTTTGCC	0.139535	FALSE	TRBV10-2*01		TRBJ1-5*01	CASREPPQHF
KW11	Pat272	CGGCTAGAGAGGTAGA	0.381503	FALSE	TRBV7-9*01	TRBD1*01	TRBJ2-7*01	CASSPGTSYEQYF
IW9	Pat272	CGTTGGGGTTATGCGT	0.0078125	FALSE	TRBV13*01		TRBJ2-1*01	CASSLLDNEQFF
KW11	Pat272	CTTCTCTGTAGAGCTG	1.11511	TRUE	TRBV4-2*01	TRBD1*01	TRBJ2-7*01	CASSQVQGGYEQYF
KW11	Pat272	GAAGCAGCAAACCTAC	0.751412	TRUE	TRBV9*01	TRBD1*01	TRBJ1-5*01	CASSVEGVGNQPQHF
IW9	Pat1401	GAATAAGCACGAAGCA	0.178947	FALSE	TRBV7-9*03	TRBD1*01	TRBJ2-3*01	CASSSPPDRQTSTDTQYF
KW11	Pat272	GACGTTATCAACACTG	0.730263	TRUE	TRBV5-6*01	TRBD2*01	TRBJ2-7*01	CASSFGGGTYEQYF
TW10	Pat1401	GACTAACGTAAACACA	0.185841	FALSE	TRBV5-1*01		TRBJ1-1*01	CASSIGNTEAFF
TW10	Pat1401	GTTACAGGTACATCCA	0.140056	FALSE	TRBV5-1*01	TRBD1*01	TRBJ1-1*01	CASRQGGNTEAFF
TW10	Pat1401	GTTCGGGGTGAGGCTA	0.112108	FALSE	TRBV9*01	TRBD1*01	TRBJ2-7*01	CASSVGGYSYEQYF
TW10	Pat272	TAGTGGTAGATGTAAC	0.0218978	FALSE	TRBV9*01	TRBD1*01	TRBJ2-7*01	CASSAVPGTGSSYEQYF
TW10	Pat272	TAGTGGTAGCGTAATA	0.0300429	FALSE	TRBV4-1*01	TRBD1*01	TRBJ1-1*01	CASSQTDRNTEAFF
TW10	Pat1401	TGCGCAGTCCATGCTC	0.11165	FALSE	TRBV5-1*01		TRBJ2-1*01	CASSLGQVGKFF
KW11	Pat272	TTGACTTGTTCCACAA	0.394203	FALSE	TRBV7-6*01	TRBD1*01	TRBJ2-7*01	CASSLSGQGREQYF

## Sheet: AIRR of included cells
Patient	Antigen	Cell barcode	Mapping_locus	sequence_id	Length	Coverage	Fraction polished	sequence	sequence_aa	locus	stop_codon	vj_in_frame	v_frameshift	productive	rev_comp	complete_vdj	v_call	d_call	j_call	sequence_alignment	germline_alignment	sequence_alignment_aa	germline_alignment_aa	v_alignment_start	v_alignment_end	d_alignment_start	d_alignment_end	j_alignment_start	j_alignment_end	v_sequence_alignment	v_sequence_alignment_aa	v_germline_alignment	v_germline_alignment_aa	d_sequence_alignment	d_sequence_alignment_aa	d_germline_alignment	d_germline_alignment_aa	j_sequence_alignment	j_sequence_alignment_aa	j_germline_alignment	j_germline_alignment_aa	fwr1	fwr1_aa	cdr1	cdr1_aa	fwr2	fwr2_aa	cdr2	cdr2_aa
Pat_208	KW11	AACCATGGTTGTCGCG	TCRbeta	tig00000006_AACCATGGTTGTCGCG	975	449	1	GATGCTGGAATCACCCAGAGCCCAAGATACAAGATCACAGAGACAGGAAGGCAGGTGACCTTGATGTGTCACCAGACTTGGAGCCACAGCTATATGTTCTGGTATCGACAAGACCTGGGACATGGGCTGAGGCTGATCTATTACTCAGCAGCTGCTGATATTACAGATAAAGGAGAAGTCCCCGATGGCTATGTTGTCTCCAGATCCAAGACAGAGAATTTCCCCCTCACTCTGGAGTCAGCTACCCGCTCCCAGACATCTGTGTATTTCTGCGCCAGCAGGACAGGGGCCGCAGATACGCAGTATTTTGGCCCAGGCACCCGGCTGACAGTGCTCG	DAGITQSPRYKITETGRQVTLMCHQTWSHSYMFWYRQDLGHGLRLIYYSAAADITDKGEVPDGYVVSRSKTENFPLTLESATRSQTSVYFCASRTGAADTQYFGPGTRLTVL	TRB	F	T	F	T	F	T	TRBV10-2*01	TRBD1*01	TRBJ2-3*01	GATGCTGGAATCACCCAGAGCCCAAGATACAAGATCACAGAGACAGGAAGGCAGGTGACCTTGATGTGTCACCAGACTTGGAGCCACAGCTATATGTTCTGGTATCGACAAGACCTGGGACATGGGCTGAGGCTGATCTATTACTCAGCAGCTGCTGATATTACAGATAAAGGAGAAGTCCCCGATGGCTATGTTGTCTCCAGATCCAAGACAGAGAATTTCCCCCTCACTCTGGAGTCAGCTACCCGCTCCCAGACATCTGTGTATTTCTGCGCCAGCAGGACAGGGGCCGCAGATACGCAGTATTTTGGCCCAGGCACCCGGCTGACAGTGCTCG	GATGCTGGAATCACCCAGAGCCCAAGATACAAGATCACAGAGACAGGAAGGCAGGTGACCTTGATGTGTCACCAGACTTGGAGCCACAGCTATATGTTCTGGTATCGACAAGACCTGGGACATGGGCTGAGGCTGATCTATTACTCAGCAGCTGCTGATATTACAGATAAAGGAGAAGTCCCCGATGGCTATGTTGTCTCCAGATCCAAGACAGAGAATTTCCCCCTCACTCTGGAGTCAGCTACCCGCTCCCAGACATCTGTGTATTTCTGCGCCAGCAGGACAGGGGNNNCAGATACGCAGTATTTTGGCCCAGGCACCCGGCTGACAGTGCTCG	DAGITQSPRYKITETGRQVTLMCHQTWSHSYMFWYRQDLGHGLRLIYYSAAADITDKGEVPDGYVVSRSKTENFPLTLESATRSQTSVYFCASRTGAADTQYFGPGTRLTVL	DAGITQSPRYKITETGRQVTLMCHQTWSHSYMFWYRQDLGHGLRLIYYSAAADITDKGEVPDGYVVSRSKTENFPLTLESATRSQTSVYFCASRTGXXDTQYFGPGTRLTVL	1	281	282	289	293	337	GATGCTGGAATCACCCAGAGCCCAAGATACAAGATCACAGAGACAGGAAGGCAGGTGACCTTGATGTGTCACCAGACTTGGAGCCACAGCTATATGTTCTGGTATCGACAAGACCTGGGACATGGGCTGAGGCTGATCTATTACTCAGCAGCTGCTGATATTACAGATAAAGGAGAAGTCCCCGATGGCTATGTTGTCTCCAGATCCAAGACAGAGAATTTCCCCCTCACTCTGGAGTCAGCTACCCGCTCCCAGACATCTGTGTATTTCTGCGCCAGCAG	DAGITQSPRYKITETGRQVTLMCHQTWSHSYMFWYRQDLGHGLRLIYYSAAADITDKGEVPDGYVVSRSKTENFPLTLESATRSQTSVYFCAS	GATGCTGGAATCACCCAGAGCCCAAGATACAAGATCACAGAGACAGGAAGGCAGGTGACCTTGATGTGTCACCAGACTTGGAGCCACAGCTATATGTTCTGGTATCGACAAGACCTGGGACATGGGCTGAGGCTGATCTATTACTCAGCAGCTGCTGATATTACAGATAAAGGAGAAGTCCCCGATGGCTATGTTGTCTCCAGATCCAAGACAGAGAATTTCCCCCTCACTCTGGAGTCAGCTACCCGCTCCCAGACATCTGTGTATTTCTGCGCCAGCAG	DAGITQSPRYKITETGRQVTLMCHQTWSHSYMFWYRQDLGHGLRLIYYSAAADITDKGEVPDGYVVSRSKTENFPLTLESATRSQTSVYFCAS	GACAGGGG	TG	GACAGGGG	TG	CAGATACGCAGTATTTTGGCCCAGGCACCCGGCTGACAGTGCTCG	DTQYFGPGTRLTVL	CAGATACGCAGTATTTTGGCCCAGGCACCCGGCTGACAGTGCTCG	DTQYFGPGTRLTVL	GATGCTGGAATCACCCAGAGCCCAAGATACAAGATCACAGAGACAGGAAGGCAGGTGACCTTGATGTGTCACCAGACT	DAGITQSPRYKITETGRQVTLMCHQT	TGGAGCCACAGCTAT	WSHSY	ATGTTCTGGTATCGACAAGACCTGGGACATGGGCTGAGGCTGATCTATTAC	MFWYRQDLGHGLRLIYY	TCAGCAGCTGCTGATATT	SAAADI
Pat_208	KW11	AACGTTGAGCTGAAAT	TCRbeta	tig00000012_AACGTTGAGCTGAAAT	789	496	1	AATGCTGGTGTCACTCAGACCCCAAAATTCCAGGTCCTGAAGACAGGACAGAGCATGACACTGCAGTGTGCCCAGGATATGAACCATAACTCCATGTACTGGTATCGACAAGACCCAGGCATGGGACTGAGGCTGATTTATTACTCAGCTTCTGAGGGTACCACTGACAAAGGAGAAGTCCCCAATGGCTACAATGTCTCCAGATTAAACAAACGGGAGTTCTCGCTCAGGCTGGAGTCGGCTGCTCCCTCCCAGACATCTGTGTACTTCTGTGCCAGCAGGGACCGCCACTACGAGCAGTACTTCGGGCCGGGCACCAGGCTCACGGTCACAG	NAGVTQTPKFQVLKTGQSMTLQCAQDMNHNSMYWYRQDPGMGLRLIYYSASEGTTDKGEVPNGYNVSRLNKREFSLRLESAAPSQTSVYFCASRDRHYEQYFGPGTRLTVT	TRB	F	T	F	T	F	T	TRBV6-1*01		TRBJ2-7*01	AATGCTGGTGTCACTCAGACCCCAAAATTCCAGGTCCTGAAGACAGGACAGAGCATGACACTGCAGTGTGCCCAGGATATGAACCATAACTCCATGTACTGGTATCGACAAGACCCAGGCATGGGACTGAGGCTGATTTATTACTCAGCTTCTGAGGGTACCACTGACAAAGGAGAAGTCCCCAATGGCTACAATGTCTCCAGATTAAACAAACGGGAGTTCTCGCTCAGGCTGGAGTCGGCTGCTCCCTCCCAGACATCTGTGTACTTCTGTGCCAGCAGGGACCGCCACTACGAGCAGTACTTCGGGCCGGGCACCAGGCTCACGGTCACAG	AATGCTGGTGTCACTCAGACCCCAAAATTCCAGGTCCTGAAGACAGGACAGAGCATGACACTGCAGTGTGCCCAGGATATGAACCATAACTCCATGTACTGGTATCGACAAGACCCAGGCATGGGACTGAGGCTGATTTATTACTCAGCTTCTGAGGGTACCACTGACAAAGGAGAAGTCCCCAATGGCTACAATGTCTCCAGATTAAACAAACGGGAGTTCTCGCTCAGGCTGGAGTCGGCTGCTCCCTCCCAGACATCTGTGTACTTCTGTGCCAGCAGTGANNNNNNCTACGAGCAGTACTTCGGGCCGGGCACCAGGCTCACGGTCACAG	NAGVTQTPKFQVLKTGQSMTLQCAQDMNHNSMYWYRQDPGMGLRLIYYSASEGTTDKGEVPNGYNVSRLNKREFSLRLESAAPSQTSVYFCASRDRHYEQYFGPGTRLTVT	NAGVTQTPKFQVLKTGQSMTLQCAQDMNHNSMYWYRQDPGMGLRLIYYSASEGTTDKGEVPNGYNVSRLNKREFSLRLESAAPSQTSVYFCASSXXXYEQYFGPGTRLTVT	1	284			291	334	AATGCTGGTGTCACTCAGACCCCAAAATTCCAGGTCCTGAAGACAGGACAGAGCATGACACTGCAGTGTGCCCAGGATATGAACCATAACTCCATGTACTGGTATCGACAAGACCCAGGCATGGGACTGAGGCTGATTTATTACTCAGCTTCTGAGGGTACCACTGACAAAGGAGAAGTCCCCAATGGCTACAATGTCTCCAGATTAAACAAACGGGAGTTCTCGCTCAGGCTGGAGTCGGCTGCTCCCTCCCAGACATCTGTGTACTTCTGTGCCAGCAGGGA	NAGVTQTPKFQVLKTGQSMTLQCAQDMNHNSMYWYRQDPGMGLRLIYYSASEGTTDKGEVPNGYNVSRLNKREFSLRLESAAPSQTSVYFCASR	AATGCTGGTGTCACTCAGACCCCAAAATTCCAGGTCCTGAAGACAGGACAGAGCATGACACTGCAGTGTGCCCAGGATATGAACCATAACTCCATGTACTGGTATCGACAAGACCCAGGCATGGGACTGAGGCTGATTTATTACTCAGCTTCTGAGGGTACCACTGACAAAGGAGAAGTCCCCAATGGCTACAATGTCTCCAGATTAAACAAACGGGAGTTCTCGCTCAGGCTGGAGTCGGCTGCTCCCTCCCAGACATCTGTGTACTTCTGTGCCAGCAGTGA	NAGVTQTPKFQVLKTGQSMTLQCAQDMNHNSMYWYRQDPGMGLRLIYYSASEGTTDKGEVPNGYNVSRLNKREFSLRLESAAPSQTSVYFCASS					CTACGAGCAGTACTTCGGGCCGGGCACCAGGCTCACGGTCACAG	YEQYFGPGTRLTVT	CTACGAGCAGTACTTCGGGCCGGGCACCAGGCTCACGGTCACAG	YEQYFGPGTRLTVT	AATGCTGGTGTCACTCAGACCCCAAAATTCCAGGTCCTGAAGACAGGACAGAGCATGACACTGCAGTGTGCCCAGGAT	NAGVTQTPKFQVLKTGQSMTLQCAQD	ATGAACCATAACTCC	MNHNS	ATGTACTGGTATCGACAAGACCCAGGCATGGGACTGAGGCTGATTTATTAC	MYWYRQDPGMGLRLIYY	TCAGCTTCTGAGGGTACC	SASEGT
Pat_208	KW11	ACGAGGACATACGCCG	TCRbeta	tig00000005_ACGAGGACATACGCCG	865	24	1	AATGCTGGTGTCACTCAGACCCCAAAATTCCAGGTCCTGAAGACAGGACAGAGCATGACACTGCAGTGTGCCCAGGATATGAACCATAACTACATGTACTGGTATCGACAAGACCCAGGCATGGGGCTGAGGCTGATTTATTACTCAGTTGGTGCTGGTACCACTGACAAAGGAGAAGTCCCCAATGGCTACAATGTCTCCAGATCAAACACAGAGGATTTCCCGCTCAGGCTGGAGTCGGCTGCTCCCTCCCAGACATCTGTGTACTTCTGTGCCAGCAGTTACCTGGACAGGGGGAAACAGAGACAGTACTTCGGGCCAGGCACCCGGCTCACGGTGCT	NAGVTQTPKFQVLKTGQSMTLQCAQDMNHNYMYWYRQDPGMGLRLIYYSVGAGTTDKGEVPNGYNVSRSNTEDFPLRLESAAPSQTSVYFCASSYLDRGKQRQYFGPGTRLTVL	TRB	F	T	F	T	F	F	TRBV6-5*01	TRBD1*01	TRBJ2-5*01	AATGCTGGTGTCACTCAGACCCCAAAATTCCAGGTCCTGAAGACAGGACAGAGCATGACACTGCAGTGTGCCCAGGATATGAACCATAACTACATGTACTGGTATCGACAAGACCCAGGCATGGGGCTGAGGCTGATTTATTACTCAGTTGGTGCTGGTACCACTGACAAAGGAGAAGTCCCCAATGGCTACAATGTCTCCAGATCAAACACAGAGGATTTCCCGCTCAGGCTGGAGTCGGCTGCTCCCTCCCAGACATCTGTGTACTTCTGTGCCAGCAGTTACCTGGACAGGGGGAAACAGAGACAGTACTTCGGGCCAGGCACCCGGCTCACGGTGCT	AATGCTGGTGTCACTCAGACCCCAAAATTCCAGGTCCTGAAGACAGGACAGAGCATGACACTGCAGTGTGCCCAGGATATGAACCATGAATACATGTCCTGGTATCGACAAGACCCAGGCATGGGGCTGAGGCTGATTCATTACTCAGTTGGTGCTGGTATCACTGACCAAGGAGAAGTCCCCAATGGCTACAATGTCTCCAGATCAACCACAGAGGATTTCCCGCTCAGGCTGCTGTCGGCTGCTCCCTCCCAGACATCTGTGTACTTCTGTGCCAGCAGTTACNNGGACAGGGGGNNNNNNNNNCAGTACTTCGGGCCAGGCACGCGGCTCCTGGTGCT	NAGVTQTPKFQVLKTGQSMTLQCAQDMNHNYMYWYRQDPGMGLRLIYYSVGAGTTDKGEVPNGYNVSRSNTEDFPLRLESAAPSQTSVYFCASSYLDRGKQRQYFGPGTRLTVL	NAGVTQTPKFQVLKTGQSMTLQCAQDMNHEYMSWYRQDPGMGLRLIHYSVGAGITDQGEVPNGYNVSRSTTEDFPLRLLSAAPSQTSVYFCASSYXDRGXXXQYFGPGTRLLVL	1	285	288	297	307	341	AATGCTGGTGTCACTCAGACCCCAAAATTCCAGGTCCTGAAGACAGGACAGAGCATGACACTGCAGTGTGCCCAGGATATGAACCATAACTACATGTACTGGTATCGACAAGACCCAGGCATGGGGCTGAGGCTGATTTATTACTCAGTTGGTGCTGGTACCACTGACAAAGGAGAAGTCCCCAATGGCTACAATGTCTCCAGATCAAACACAGAGGATTTCCCGCTCAGGCTGGAGTCGGCTGCTCCCTCCCAGACATCTGTGTACTTCTGTGCCAGCAGTTAC	NAGVTQTPKFQVLKTGQSMTLQCAQDMNHNYMYWYRQDPGMGLRLIYYSVGAGTTDKGEVPNGYNVSRSNTEDFPLRLESAAPSQTSVYFCASSY	AATGCTGGTGTCACTCAGACCCCAAAATTCCAGGTCCTGAAGACAGGACAGAGCATGACACTGCAGTGTGCCCAGGATATGAACCATGAATACATGTCCTGGTATCGACAAGACCCAGGCATGGGGCTGAGGCTGATTCATTACTCAGTTGGTGCTGGTATCACTGACCAAGGAGAAGTCCCCAATGGCTACAATGTCTCCAGATCAACCACAGAGGATTTCCCGCTCAGGCTGCTGTCGGCTGCTCCCTCCCAGACATCTGTGTACTTCTGTGCCAGCAGTTAC	NAGVTQTPKFQVLKTGQSMTLQCAQDMNHEYMSWYRQDPGMGLRLIHYSVGAGITDQGEVPNGYNVSRSTTEDFPLRLLSAAPSQTSVYFCASSY	GGACAGGGGG	DRG	GGACAGGGGG	DRG	CAGTACTTCGGGCCAGGCACCCGGCTCACGGTGCT	QYFGPGTRLTVL	CAGTACTTCGGGCCAGGCACGCGGCTCCTGGTGCT	QYFGPGTRLLVL	AATGCTGGTGTCACTCAGACCCCAAAATTCCAGGTCCTGAAGACAGGACAGAGCATGACACTGCAGTGTGCCCAGGAT	NAGVTQTPKFQVLKTGQSMTLQCAQD	ATGAACCATAACTAC	MNHNY	ATGTACTGGTATCGACAAGACCCAGGCATGGGGCTGAGGCTGATTTATTAC	MYWYRQDPGMGLRLIYY	TCAGTTGGTGCTGGTACC	SVGAGT
Pat_208	KW11	ACGATACGTATGAAAC	TCRbeta	tig00000170_ACGATACGTATGAAAC	1104	77	1	AATGCTGGTGTCACTCAGACCCCAAAATTCCAGGTCCTGAAGACAGGACAGAGCATGACACTGCAGTGTGCCCAGGATATGAACCATGAATACATGTCCTGGTATCGACAAGACCCAGGCATGGGGCTGAGGCTGATTCATTACTCAGTTGGTGCTGGTATCACTGACCAAGGAGAAGTCCCCAATGGCTACAATGTCTCCAGATCAACCACAGAGGATTTCCCGCTCAGGCTGCTGTCGGCTGCTCCCTCCCAGACATCTGTGTACTTCTGTGCCAGCAGGGGCCTGGCTTTTAACACCGGGGAGCTGTTTTTTGGAGAAGGCTCTAGGCTGACCGTACTGG	NAGVTQTPKFQVLKTGQSMTLQCAQDMNHEYMSWYRQDPGMGLRLIHYSVGAGITDQGEVPNGYNVSRSTTEDFPLRLLSAAPSQTSVYFCASRGLAFNTGELFFGEGSRLTVL	TRB	F	T	F	T	F	T	TRBV6-5*01		TRBJ2-2*01	AATGCTGGTGTCACTCAGACCCCAAAATTCCAGGTCCTGAAGACAGGACAGAGCATGACACTGCAGTGTGCCCAGGATATGAACCATGAATACATGTCCTGGTATCGACAAGACCCAGGCATGGGGCTGAGGCTGATTCATTACTCAGTTGGTGCTGGTATCACTGACCAAGGAGAAGTCCCCAATGGCTACAATGTCTCCAGATCAACCACAGAGGATTTCCCGCTCAGGCTGCTGTCGGCTGCTCCCTCCCAGACATCTGTGTACTTCTGTGCCAGCAGGGGCCTGGCTTTTAACACCGGGGAGCTGTTTTTTGGAGAAGGCTCTAGGCTGACCGTACTGG	AATGCTGGTGTCACTCAGACCCCAAAATTCCAGGTCCTGAAGACAGGACAGAGCATGACACTGCAGTGTGCCCAGGATATGAACCATGAATACATGTCCTGGTATCGACAAGACCCAGGCATGGGGCTGAGGCTGATTCATTACTCAGTTGGTGCTGGTATCACTGACCAAGGAGAAGTCCCCAATGGCTACAATGTCTCCAGATCAACCACAGAGGATTTCCCGCTCAGGCTGCTGTCGGCTGCTCCCTCCCAGACATCTGTGTACTTCTGTGCCAGCAGNNNNNNNNNNNNNAACACCGGGGAGCTGTTTTTTGGAGAAGGCTCTAGGCTGACCGTACTGG	NAGVTQTPKFQVLKTGQSMTLQCAQDMNHEYMSWYRQDPGMGLRLIHYSVGAGITDQGEVPNGYNVSRSTTEDFPLRLLSAAPSQTSVYFCASRGLAFNTGELFFGEGSRLTVL	NAGVTQTPKFQVLKTGQSMTLQCAQDMNHEYMSWYRQDPGMGLRLIHYSVGAGITDQGEVPNGYNVSRSTTEDFPLRLLSAAPSQTSVYFCASXXXXXNTGELFFGEGSRLTVL	1	281			295	343	AATGCTGGTGTCACTCAGACCCCAAAATTCCAGGTCCTGAAGACAGGACAGAGCATGACACTGCAGTGTGCCCAGGATATGAACCATGAATACATGTCCTGGTATCGACAAGACCCAGGCATGGGGCTGAGGCTGATTCATTACTCAGTTGGTGCTGGTATCACTGACCAAGGAGAAGTCCCCAATGGCTACAATGTCTCCAGATCAACCACAGAGGATTTCCCGCTCAGGCTGCTGTCGGCTGCTCCCTCCCAGACATCTGTGTACTTCTGTGCCAGCAG	NAGVTQTPKFQVLKTGQSMTLQCAQDMNHEYMSWYRQDPGMGLRLIHYSVGAGITDQGEVPNGYNVSRSTTEDFPLRLLSAAPSQTSVYFCAS	AATGCTGGTGTCACTCAGACCCCAAAATTCCAGGTCCTGAAGACAGGACAGAGCATGACACTGCAGTGTGCCCAGGATATGAACCATGAATACATGTCCTGGTATCGACAAGACCCAGGCATGGGGCTGAGGCTGATTCATTACTCAGTTGGTGCTGGTATCACTGACCAAGGAGAAGTCCCCAATGGCTACAATGTCTCCAGATCAACCACAGAGGATTTCCCGCTCAGGCTGCTGTCGGCTGCTCCCTCCCAGACATCTGTGTACTTCTGTGCCAGCAG	NAGVTQTPKFQVLKTGQSMTLQCAQDMNHEYMSWYRQDPGMGLRLIHYSVGAGITDQGEVPNGYNVSRSTTEDFPLRLLSAAPSQTSVYFCAS					AACACCGGGGAGCTGTTTTTTGGAGAAGGCTCTAGGCTGACCGTACTGG	NTGELFFGEGSRLTVL	AACACCGGGGAGCTGTTTTTTGGAGAAGGCTCTAGGCTGACCGTACTGG	NTGELFFGEGSRLTVL	AATGCTGGTGTCACTCAGACCCCAAAATTCCAGGTCCTGAAGACAGGACAGAGCATGACACTGCAGTGTGCCCAGGAT	NAGVTQTPKFQVLKTGQSMTLQCAQD	ATGAACCATGAATAC	MNHEY	ATGTCCTGGTATCGACAAGACCCAGGCATGGGGCTGAGGCTGATTCATTAC	MSWYRQDPGMGLRLIHY	TCAGTTGGTGCTGGTATC	SVGAGI
Pat_208	TW10	ACGATGTCATCGTCGG	TCRbeta	tig00000004_ACGATGTCATCGTCGG	1741	227	1	GAGACTGGAGTCACCCAAAGTCCCACACACCTGATCAAAACGAGAGGACAGCAAGTGACTCTGAGATGCTCTTCTCAGTCTGGGCACAACACTGTGTCCTGGTACCAACAGGCCCTGGGTCAGGGGCCCCAGTTTATCTTTCAGTATTATAGGGAGGAAGAGAATGGCAGAGGAAACTTCCCTCCTAGATTCTCAGGTCTCCAGTTCCCTAATTATAGCTCTGAGCTGAATGTGAACGCCTTGGAGCTGGACGACTCGGCCCTGTATCTCTGTGCCAGCAGCTTGAGGGGGCACACCGGGGAGCTGTTTTTTGGAGAAGGCTCTAGGCTGACCGTACTGG	ETGVTQSPTHLIKTRGQQVTLRCSSQSGHNTVSWYQQALGQGPQFIFQYYREEENGRGNFPPRFSGLQFPNYSSELNVNALELDDSALYLCASSLRGHTGELFFGEGSRLTVL	TRB	F	T	F	T	F	T	TRBV5-4*01	TRBD1*01	TRBJ2-2*01	GAGACTGGAGTCACCCAAAGTCCCACACACCTGATCAAAACGAGAGGACAGCAAGTGACTCTGAGATGCTCTTCTCAGTCTGGGCACAACACTGTGTCCTGGTACCAACAGGCCCTGGGTCAGGGGCCCCAGTTTATCTTTCAGTATTATAGGGAGGAAGAGAATGGCAGAGGAAACTTCCCTCCTAGATTCTCAGGTCTCCAGTTCCCTAATTATAGCTCTGAGCTGAATGTGAACGCCTTGGAGCTGGACGACTCGGCCCTGTATCTCTGTGCCAGCAGCTTGAGGGGGCACACCGGGGAGCTGTTTTTTGGAGAAGGCTCTAGGCTGACCGTACTGG	GAGACTGGAGTCACCCAAAGTCCCACACACCTGATCAAAACGAGAGGACAGCAAGTGACTCTGAGATGCTCTTCTCAGTCTGGGCACAACACTGTGTCCTGGTACCAACAGGCCCTGGGTCAGGGGCCCCAGTTTATCTTTCAGTATTATAGGGAGGAAGAGAATGGCAGAGGAAACTTCCCTCCTAGATTCTCAGGTCTCCAGTTCCCTAATTATAGCTCTGAGCTGAATGTGAACGCCTTGGAGCTGGACGACTCGGCCCTGTATCTCTGTGCCAGCAGCTTGAGGGGGCACACCGGGGAGCTGTTTTTTGGAGAAGGCTCTAGGCTGACCGTACTGG	ETGVTQSPTHLIKTRGQQVTLRCSSQSGHNTVSWYQQALGQGPQFIFQYYREEENGRGNFPPRFSGLQFPNYSSELNVNALELDDSALYLCASSLRGHTGELFFGEGSRLTVL	ETGVTQSPTHLIKTRGQQVTLRCSSQSGHNTVSWYQQALGQGPQFIFQYYREEENGRGNFPPRFSGLQFPNYSSELNVNALELDDSALYLCASSLRGHTGELFFGEGSRLTVL	1	285	286	292	293	340	GAGACTGGAGTCACCCAAAGTCCCACACACCTGATCAAAACGAGAGGACAGCAAGTGACTCTGAGATGCTCTTCTCAGTCTGGGCACAACACTGTGTCCTGGTACCAACAGGCCCTGGGTCAGGGGCCCCAGTTTATCTTTCAGTATTATAGGGAGGAAGAGAATGGCAGAGGAAACTTCCCTCCTAGATTCTCAGGTCTCCAGTTCCCTAATTATAGCTCTGAGCTGAATGTGAACGCCTTGGAGCTGGACGACTCGGCCCTGTATCTCTGTGCCAGCAGCTTG	ETGVTQSPTHLIKTRGQQVTLRCSSQSGHNTVSWYQQALGQGPQFIFQYYREEENGRGNFPPRFSGLQFPNYSSELNVNALELDDSALYLCASSL	GAGACTGGAGTCACCCAAAGTCCCACACACCTGATCAAAACGAGAGGACAGCAAGTGACTCTGAGATGCTCTTCTCAGTCTGGGCACAACACTGTGTCCTGGTACCAACAGGCCCTGGGTCAGGGGCCCCAGTTTATCTTTCAGTATTATAGGGAGGAAGAGAATGGCAGAGGAAACTTCCCTCCTAGATTCTCAGGTCTCCAGTTCCCTAATTATAGCTCTGAGCTGAATGTGAACGCCTTGGAGCTGGACGACTCGGCCCTGTATCTCTGTGCCAGCAGCTTG	ETGVTQSPTHLIKTRGQQVTLRCSSQSGHNTVSWYQQALGQGPQFIFQYYREEENGRGNFPPRFSGLQFPNYSSELNVNALELDDSALYLCASSL	AGGGGGC	RG	AGGGGGC	RG	ACACCGGGGAGCTGTTTTTTGGAGAAGGCTCTAGGCTGACCGTACTGG	TGELFFGEGSRLTVL	ACACCGGGGAGCTGTTTTTTGGAGAAGGCTCTAGGCTGACCGTACTGG	TGELFFGEGSRLTVL	GAGACTGGAGTCACCCAAAGTCCCACACACCTGATCAAAACGAGAGGACAGCAAGTGACTCTGAGATGCTCTTCTCAG	ETGVTQSPTHLIKTRGQQVTLRCSSQ	TCTGGGCACAACACT	SGHNT	GTGTCCTGGTACCAACAGGCCCTGGGTCAGGGGCCCCAGTTTATCTTTCAG	VSWYQQALGQGPQFIFQ	TATTATAGGGAGGAAGAG	YYREEE
Pat_208	KW11	AGCCTAAGTATCTGCA	TCRbeta	tig00000010_AGCCTAAGTATCTGCA	985	477	1	AATGCTGGTGTCACTCAGACCCCAAAATTCCAGGTCCTGAAGACAGGACAGAGCATGACACTGCAGTGTGCCCAGGATATGAACCATGAATACATGTCCTGGTATCGACAAGACCCAGGCATGGGGCTGAGGCTGATTCATTACTCAGTTGGTGCTGGTATCACTGACCAAGGAGAAGTCCCCAATGGCTACAATGTCTCCAGATCAACCACAGAGGATTTCCCGCTCAGGCTGCTGTCGGCTGCTCCCTCCCAGACATCTGTGTACTTCTGTGCCAGCAGTTACGGGGGCTCCTACGAGCAGTACTTCGGGCCGGGCACCAGGCTCACGGTCACAG	NAGVTQTPKFQVLKTGQSMTLQCAQDMNHEYMSWYRQDPGMGLRLIHYSVGAGITDQGEVPNGYNVSRSTTEDFPLRLLSAAPSQTSVYFCASSYGGSYEQYFGPGTRLTVT	TRB	F	T	F	T	F	T	TRBV6-5*01	TRBD1*01	TRBJ2-7*01	AATGCTGGTGTCACTCAGACCCCAAAATTCCAGGTCCTGAAGACAGGACAGAGCATGACACTGCAGTGTGCCCAGGATATGAACCATGAATACATGTCCTGGTATCGACAAGACCCAGGCATGGGGCTGAGGCTGATTCATTACTCAGTTGGTGCTGGTATCACTGACCAAGGAGAAGTCCCCAATGGCTACAATGTCTCCAGATCAACCACAGAGGATTTCCCGCTCAGGCTGCTGTCGGCTGCTCCCTCCCAGACATCTGTGTACTTCTGTGCCAGCAGTTACGGGGGCTCCTACGAGCAGTACTTCGGGCCGGGCACCAGGCTCACGGTCACAG	AATGCTGGTGTCACTCAGACCCCAAAATTCCAGGTCCTGAAGACAGGACAGAGCATGACACTGCAGTGTGCCCAGGATATGAACCATGAATACATGTCCTGGTATCGACAAGACCCAGGCATGGGGCTGAGGCTGATTCATTACTCAGTTGGTGCTGGTATCACTGACCAAGGAGAAGTCCCCAATGGCTACAATGTCTCCAGATCAACCACAGAGGATTTCCCGCTCAGGCTGCTGTCGGCTGCTCCCTCCCAGACATCTGTGTACTTCTGTGCCAGCAGTTACGGGGGCTCCTACGAGCAGTACTTCGGGCCGGGCACCAGGCTCACGGTCACAG	NAGVTQTPKFQVLKTGQSMTLQCAQDMNHEYMSWYRQDPGMGLRLIHYSVGAGITDQGEVPNGYNVSRSTTEDFPLRLLSAAPSQTSVYFCASSYGGSYEQYFGPGTRLTVT	NAGVTQTPKFQVLKTGQSMTLQCAQDMNHEYMSWYRQDPGMGLRLIHYSVGAGITDQGEVPNGYNVSRSTTEDFPLRLLSAAPSQTSVYFCASSYGGSYEQYFGPGTRLTVT	1	285	286	290	291	337	AATGCTGGTGTCACTCAGACCCCAAAATTCCAGGTCCTGAAGACAGGACAGAGCATGACACTGCAGTGTGCCCAGGATATGAACCATGAATACATGTCCTGGTATCGACAAGACCCAGGCATGGGGCTGAGGCTGATTCATTACTCAGTTGGTGCTGGTATCACTGACCAAGGAGAAGTCCCCAATGGCTACAATGTCTCCAGATCAACCACAGAGGATTTCCCGCTCAGGCTGCTGTCGGCTGCTCCCTCCCAGACATCTGTGTACTTCTGTGCCAGCAGTTAC	NAGVTQTPKFQVLKTGQSMTLQCAQDMNHEYMSWYRQDPGMGLRLIHYSVGAGITDQGEVPNGYNVSRSTTEDFPLRLLSAAPSQTSVYFCASSY	AATGCTGGTGTCACTCAGACCCCAAAATTCCAGGTCCTGAAGACAGGACAGAGCATGACACTGCAGTGTGCCCAGGATATGAACCATGAATACATGTCCTGGTATCGACAAGACCCAGGCATGGGGCTGAGGCTGATTCATTACTCAGTTGGTGCTGGTATCACTGACCAAGGAGAAGTCCCCAATGGCTACAATGTCTCCAGATCAACCACAGAGGATTTCCCGCTCAGGCTGCTGTCGGCTGCTCCCTCCCAGACATCTGTGTACTTCTGTGCCAGCAGTTAC	NAGVTQTPKFQVLKTGQSMTLQCAQDMNHEYMSWYRQDPGMGLRLIHYSVGAGITDQGEVPNGYNVSRSTTEDFPLRLLSAAPSQTSVYFCASSY	GGGGG	GG	GGGGG	GG	CTCCTACGAGCAGTACTTCGGGCCGGGCACCAGGCTCACGGTCACAG	SYEQYFGPGTRLTVT	CTCCTACGAGCAGTACTTCGGGCCGGGCACCAGGCTCACGGTCACAG	SYEQYFGPGTRLTVT	AATGCTGGTGTCACTCAGACCCCAAAATTCCAGGTCCTGAAGACAGGACAGAGCATGACACTGCAGTGTGCCCAGGAT	NAGVTQTPKFQVLKTGQSMTLQCAQD	ATGAACCATGAATAC	MNHEY	ATGTCCTGGTATCGACAAGACCCAGGCATGGGGCTGAGGCTGATTCATTAC	MSWYRQDPGMGLRLIHY	TCAGTTGGTGCTGGTATC	SVGAGI
Pat_208	KW11	AGTTGGTGTACTCAAC	TCRbeta	tig00000002_AGTTGGTGTACTCAAC	1235	266	1	GATACTGGAGTCTCCCAGGACCCCAGACACAAGATCACAAAGAGGGGACAGAATGTAACTTTCAGGTGTGATCCAATTTCTGAACACAGCCGCCTTTATTGGTACCGACAGACCCTGGGGCAGGGCCCAGAGTTTCTGACTTACTTCCAGAATGAAGCTCAACTAGAAAAATCAAGGCTGCTCAGTGATCGGTTCTCTGCAGAGAGGCCTAAGGGATCTTTCTCCACCTTGGAGATCCAGCGCACAGAGCAGGGGGACTCGGCCATGTATCTCTGTGCCAGCAGCTTAGATAGGGTAATCGGCTCTGGAAACACCATATATTTTGGAGAGGGAAGTTGGCTCACTGTTGTAG	DTGVSQDPRHKITKRGQNVTFRCDPISEHSRLYWYRQTLGQGPEFLTYFQNEAQLEKSRLLSDRFSAERPKGSFSTLEIQRTEQGDSAMYLCASSLDRVIGSGNTIYFGEGSWLTVV	TRB	F	T	F	T	F	T	TRBV7-9*03		TRBJ1-3*01	GATACTGGAGTCTCCCAGGACCCCAGACACAAGATCACAAAGAGGGGACAGAATGTAACTTTCAGGTGTGATCCAATTTCTGAACACAGCCGCCTTTATTGGTACCGACAGACCCTGGGGCAGGGCCCAGAGTTTCTGACTTACTTCCAGAATGAAGCTCAACTAGAAAAATCAAGGCTGCTCAGTGATCGGTTCTCTGCAGAGAGGCCTAAGGGATCTTTCTCCACCTTGGAGATCCAGCGCACAGAGCAGGGGGACTCGGCCATGTATCTCTGTGCCAGCAGCTTAGATAGGGTAATCGGCTCTGGAAACACCATATATTTTGGAGAGGGAAGTTGGCTCACTGTTGTAG	GATACTGGAGTCTCCCAGGACCCCAGACACAAGATCACAAAGAGGGGACAGAATGTAACTTTCAGGTGTGATCCAATTTCTGAACACAACCGCCTTTATTGGTACCGACAGACCCTGGGGCAGGGCCCAGAGTTTCTGACTTACTTCCAGAATGAAGCTCAACTAGAAAAATCAAGGCTGCTCAGTGATCGGTTCTCTGCAGAGAGGCCTAAGGGATCTTTCTCCACCTTGGAGATCCAGCGCACAGAGCAGGGGGACTCGGCCATGTATCTCTGTGCCAGCAGCTTAGNNNNNNNNNNNNNCTCTGGAAACACCATATATTTTGGAGAGGGAAGTTGGCTCACTGTTGTAG	DTGVSQDPRHKITKRGQNVTFRCDPISEHSRLYWYRQTLGQGPEFLTYFQNEAQLEKSRLLSDRFSAERPKGSFSTLEIQRTEQGDSAMYLCASSLDRVIGSGNTIYFGEGSWLTVV	DTGVSQDPRHKITKRGQNVTFRCDPISEHNRLYWYRQTLGQGPEFLTYFQNEAQLEKSRLLSDRFSAERPKGSFSTLEIQRTEQGDSAMYLCASSLXXXXXSGNTIYFGEGSWLTVV	1	289			303	352	GATACTGGAGTCTCCCAGGACCCCAGACACAAGATCACAAAGAGGGGACAGAATGTAACTTTCAGGTGTGATCCAATTTCTGAACACAGCCGCCTTTATTGGTACCGACAGACCCTGGGGCAGGGCCCAGAGTTTCTGACTTACTTCCAGAATGAAGCTCAACTAGAAAAATCAAGGCTGCTCAGTGATCGGTTCTCTGCAGAGAGGCCTAAGGGATCTTTCTCCACCTTGGAGATCCAGCGCACAGAGCAGGGGGACTCGGCCATGTATCTCTGTGCCAGCAGCTTAG	DTGVSQDPRHKITKRGQNVTFRCDPISEHSRLYWYRQTLGQGPEFLTYFQNEAQLEKSRLLSDRFSAERPKGSFSTLEIQRTEQGDSAMYLCASSL	GATACTGGAGTCTCCCAGGACCCCAGACACAAGATCACAAAGAGGGGACAGAATGTAACTTTCAGGTGTGATCCAATTTCTGAACACAACCGCCTTTATTGGTACCGACAGACCCTGGGGCAGGGCCCAGAGTTTCTGACTTACTTCCAGAATGAAGCTCAACTAGAAAAATCAAGGCTGCTCAGTGATCGGTTCTCTGCAGAGAGGCCTAAGGGATCTTTCTCCACCTTGGAGATCCAGCGCACAGAGCAGGGGGACTCGGCCATGTATCTCTGTGCCAGCAGCTTAG	DTGVSQDPRHKITKRGQNVTFRCDPISEHNRLYWYRQTLGQGPEFLTYFQNEAQLEKSRLLSDRFSAERPKGSFSTLEIQRTEQGDSAMYLCASSL					CTCTGGAAACACCATATATTTTGGAGAGGGAAGTTGGCTCACTGTTGTAG	SGNTIYFGEGSWLTVV	CTCTGGAAACACCATATATTTTGGAGAGGGAAGTTGGCTCACTGTTGTAG	SGNTIYFGEGSWLTVV	GATACTGGAGTCTCCCAGGACCCCAGACACAAGATCACAAAGAGGGGACAGAATGTAACTTTCAGGTGTGATCCAATT	DTGVSQDPRHKITKRGQNVTFRCDPI	TCTGAACACAGCCGC	SEHSR	CTTTATTGGTACCGACAGACCCTGGGGCAGGGCCCAGAGTTTCTGACTTAC	LYWYRQTLGQGPEFLTY	TTCCAGAATGAAGCTCAA	FQNEAQ
Pat_208	KW11	ATCCGAAGTCCAGTTA	TCRbeta	tig00000169_ATCCGAAGTCCAGTTA	665	319	1	AAGGCTGGAGTCACTCAAACTCCAAGATATCTGATCAAAACGAGAGGACAGCAAGTGACACTGAGCTGCTCCCCTATCTCTGGGCATAGGAGTGTATCCTGGTACCAACAGACCCCAGGACAGGGCCTTCAGTTCCTCTTTGAATACTTCAGTGAGACACAGAGAAACAAAGGAAACTTCCCTGGTCGATTCTCAGGGCGCCAGTTCTCTAACTCTCGCTCTGAGATGAATGTGAGCACCTTGGAGCTGGGGGACTCGGCCCTTTATCTTTGCGCCAGCAGCTTGGGACCGGGACAGGGTTACGAGCAGTACTTCGGGCCGGGCACCAGGCTCACGGTCACAG	KAGVTQTPRYLIKTRGQQVTLSCSPISGHRSVSWYQQTPGQGLQFLFEYFSETQRNKGNFPGRFSGRQFSNSRSEMNVSTLELGDSALYLCASSLGPGQGYEQYFGPGTRLTVT	TRB	F	T	F	T	F	T	TRBV5-1*01	TRBD1*01	TRBJ2-7*01	AAGGCTGGAGTCACTCAAACTCCAAGATATCTGATCAAAACGAGAGGACAGCAAGTGACACTGAGCTGCTCCCCTATCTCTGGGCATAGGAGTGTATCCTGGTACCAACAGACCCCAGGACAGGGCCTTCAGTTCCTCTTTGAATACTTCAGTGAGACACAGAGAAACAAAGGAAACTTCCCTGGTCGATTCTCAGGGCGCCAGTTCTCTAACTCTCGCTCTGAGATGAATGTGAGCACCTTGGAGCTGGGGGACTCGGCCCTTTATCTTTGCGCCAGCAGCTTGGGACCGGGACAGGGTTACGAGCAGTACTTCGGGCCGGGCACCAGGCTCACGGTCACAG	AAGGCTGGAGTCACTCAAACTCCAAGATATCTGATCAAAACGAGAGGACAGCAAGTGACACTGAGCTGCTCCCCTATCTCTGGGCATAGGAGTGTATCCTGGTACCAACAGACCCCAGGACAGGGCCTTCAGTTCCTCTTTGAATACTTCAGTGAGACACAGAGAAACAAAGGAAACTTCCCTGGTCGATTCTCAGGGCGCCAGTTCTCTAACTCTCGCTCTGAGATGAATGTGAGCACCTTGGAGCTGGGGGACTCGGCCCTTTATCTTTGCGCCAGCAGCTTGGNNNNGGGACAGGGNTACGAGCAGTACTTCGGGCCGGGCACCAGGCTCACGGTCACAG	KAGVTQTPRYLIKTRGQQVTLSCSPISGHRSVSWYQQTPGQGLQFLFEYFSETQRNKGNFPGRFSGRQFSNSRSEMNVSTLELGDSALYLCASSLGPGQGYEQYFGPGTRLTVT	KAGVTQTPRYLIKTRGQQVTLSCSPISGHRSVSWYQQTPGQGLQFLFEYFSETQRNKGNFPGRFSGRQFSNSRSEMNVSTLELGDSALYLCASSLXXGQGYEQYFGPGTRLTVT	1	286	291	299	301	343	AAGGCTGGAGTCACTCAAACTCCAAGATATCTGATCAAAACGAGAGGACAGCAAGTGACACTGAGCTGCTCCCCTATCTCTGGGCATAGGAGTGTATCCTGGTACCAACAGACCCCAGGACAGGGCCTTCAGTTCCTCTTTGAATACTTCAGTGAGACACAGAGAAACAAAGGAAACTTCCCTGGTCGATTCTCAGGGCGCCAGTTCTCTAACTCTCGCTCTGAGATGAATGTGAGCACCTTGGAGCTGGGGGACTCGGCCCTTTATCTTTGCGCCAGCAGCTTGG	KAGVTQTPRYLIKTRGQQVTLSCSPISGHRSVSWYQQTPGQGLQFLFEYFSETQRNKGNFPGRFSGRQFSNSRSEMNVSTLELGDSALYLCASSL	AAGGCTGGAGTCACTCAAACTCCAAGATATCTGATCAAAACGAGAGGACAGCAAGTGACACTGAGCTGCTCCCCTATCTCTGGGCATAGGAGTGTATCCTGGTACCAACAGACCCCAGGACAGGGCCTTCAGTTCCTCTTTGAATACTTCAGTGAGACACAGAGAAACAAAGGAAACTTCCCTGGTCGATTCTCAGGGCGCCAGTTCTCTAACTCTCGCTCTGAGATGAATGTGAGCACCTTGGAGCTGGGGGACTCGGCCCTTTATCTTTGCGCCAGCAGCTTGG	KAGVTQTPRYLIKTRGQQVTLSCSPISGHRSVSWYQQTPGQGLQFLFEYFSETQRNKGNFPGRFSGRQFSNSRSEMNVSTLELGDSALYLCASSL	GGGACAGGG	GQG	GGGACAGGG	GQG	TACGAGCAGTACTTCGGGCCGGGCACCAGGCTCACGGTCACAG	YEQYFGPGTRLTVT	TACGAGCAGTACTTCGGGCCGGGCACCAGGCTCACGGTCACAG	YEQYFGPGTRLTVT	AAGGCTGGAGTCACTCAAACTCCAAGATATCTGATCAAAACGAGAGGACAGCAAGTGACACTGAGCTGCTCCCCTATC	KAGVTQTPRYLIKTRGQQVTLSCSPI	TCTGGGCATAGGAGT	SGHRS	GTATCCTGGTACCAACAGACCCCAGGACAGGGCCTTCAGTTCCTCTTTGAA	VSWYQQTPGQGLQFLFE	TACTTCAGTGAGACACAG	YFSETQ
Pat_208	KW11	ATCGAGTCATCTATGG	TCRbeta	tig00000003_ATCGAGTCATCTATGG	1742	369	1	AATGCTGGTGTCACTCAGACCCCAAAATTCCGCATCCTGAAGATAGGACAGAGCATGACACTGCAGTGTGCCCAGGATATGAACCATAACTACATGTACTGGTATCGACAAGACCCAGGCATGGGGCTGAAGCTGATTTATTATTCAGTTGGTGCTGGTATCACTGATAAAGGAGAAGTCCCGAATGGCTACAACGTCTCCAGATCAACCACAGAGTATTTCCCGCTCAGGCTGGAGTTGGCTGCTCCCTCCCAGACATCTGTGTACTTCTGTGCCAGCAGTTTAGGGCTGTACACTGAAGCTTTCTTTGGACAAGGCACCAGACTCACAGTTGTAG	NAGVTQTPKFRILKIGQSMTLQCAQDMNHNYMYWYRQDPGMGLKLIYYSVGAGITDKGEVPNGYNVSRSTTEYFPLRLELAAPSQTSVYFCASSLGLYTEAFFGQGTRLTVV	TRB	F	T	F	T	F	T	TRBV6-6*03		TRBJ1-1*01	AATGCTGGTGTCACTCAGACCCCAAAATTCCGCATCCTGAAGATAGGACAGAGCATGACACTGCAGTGTGCCCAGGATATGAACCATAACTACATGTACTGGTATCGACAAGACCCAGGCATGGGGCTGAAGCTGATTTATTATTCAGTTGGTGCTGGTATCACTGATAAAGGAGAAGTCCCGAATGGCTACAACGTCTCCAGATCAACCACAGAGTATTTCCCGCTCAGGCTGGAGTTGGCTGCTCCCTCCCAGACATCTGTGTACTTCTGTGCCAGCAGTTTAGGGCTGTACACTGAAGCTTTCTTTGGACAAGGCACCAGACTCACAGTTGTAG	AATGCTGGTGTCACTCAGACCCCAAAATTCCGCATCCTGAAGATAGGACAGAGCATGACACTGCAGTGTGCCCAGGATATGAACCATAACTACATGTACTGGTATCGACAAGACCCAGGCATGGGGCTGAAGCTGATTTATTATTCAGTTGGTGCTGGTATCACTGATAAAGGAGAAGTCCCGAATGGCTACAACGTCTCCAGATCAACCACAGAGGATTTCCCGCTCAGGCTGGAGTTGGCTGCTCCCTCCCAGACATCTGTGTACTTCTGTGCCAGCAGTNNNNNNNNNNACACTGAAGCTTTCTTTGGACAAGGCACCAGACTCACAGTTGTAG	NAGVTQTPKFRILKIGQSMTLQCAQDMNHNYMYWYRQDPGMGLKLIYYSVGAGITDKGEVPNGYNVSRSTTEYFPLRLELAAPSQTSVYFCASSLGLYTEAFFGQGTRLTVV	NAGVTQTPKFRILKIGQSMTLQCAQDMNHNYMYWYRQDPGMGLKLIYYSVGAGITDKGEVPNGYNVSRSTTEDFPLRLELAAPSQTSVYFCASSXXXXTEAFFGQGTRLTVV	1	282			293	337	AATGCTGGTGTCACTCAGACCCCAAAATTCCGCATCCTGAAGATAGGACAGAGCATGACACTGCAGTGTGCCCAGGATATGAACCATAACTACATGTACTGGTATCGACAAGACCCAGGCATGGGGCTGAAGCTGATTTATTATTCAGTTGGTGCTGGTATCACTGATAAAGGAGAAGTCCCGAATGGCTACAACGTCTCCAGATCAACCACAGAGTATTTCCCGCTCAGGCTGGAGTTGGCTGCTCCCTCCCAGACATCTGTGTACTTCTGTGCCAGCAGT	NAGVTQTPKFRILKIGQSMTLQCAQDMNHNYMYWYRQDPGMGLKLIYYSVGAGITDKGEVPNGYNVSRSTTEYFPLRLELAAPSQTSVYFCASS	AATGCTGGTGTCACTCAGACCCCAAAATTCCGCATCCTGAAGATAGGACAGAGCATGACACTGCAGTGTGCCCAGGATATGAACCATAACTACATGTACTGGTATCGACAAGACCCAGGCATGGGGCTGAAGCTGATTTATTATTCAGTTGGTGCTGGTATCACTGATAAAGGAGAAGTCCCGAATGGCTACAACGTCTCCAGATCAACCACAGAGGATTTCCCGCTCAGGCTGGAGTTGGCTGCTCCCTCCCAGACATCTGTGTACTTCTGTGCCAGCAGT	NAGVTQTPKFRILKIGQSMTLQCAQDMNHNYMYWYRQDPGMGLKLIYYSVGAGITDKGEVPNGYNVSRSTTEDFPLRLELAAPSQTSVYFCASS					ACACTGAAGCTTTCTTTGGACAAGGCACCAGACTCACAGTTGTAG	TEAFFGQGTRLTVV	ACACTGAAGCTTTCTTTGGACAAGGCACCAGACTCACAGTTGTAG	TEAFFGQGTRLTVV	AATGCTGGTGTCACTCAGACCCCAAAATTCCGCATCCTGAAGATAGGACAGAGCATGACACTGCAGTGTGCCCAGGAT	NAGVTQTPKFRILKIGQSMTLQCAQD	ATGAACCATAACTAC	MNHNY	ATGTACTGGTATCGACAAGACCCAGGCATGGGGCTGAAGCTGATTTATTAT	MYWYRQDPGMGLKLIYY	TCAGTTGGTGCTGGTATC	SVGAGI
Pat_208	KW11	ATTGGTGGTTTGTGTG	TCRbeta	tig00000004_ATTGGTGGTTTGTGTG	918	303	1	AATGCTGGTGTCACTCAGACCCCAAAATTCCAGGTCCTGAAGACAGGACAGAGCATGACACTGCAGTGTGCCCAGGATATGAACCATGAATACATGTCCTGGTATCGACAAGACCCAGGCATGGGGCTGAGGCTGATTCATTACTCAGTTGGTGCTGGTATCACTGACCAAGGAGAAGTCCCCAATGGCTACAATGTCTCCAGATCAACCACAGAGGATTTCCCGCTCAGGCTGCTGTCGGCTGCTCCCTCCCAGACATCTGTGTACTTCTGTGCCAGCAGTCACGGGGCAGGGGACTACGAGCAGTACTTCGGGCCGGGCACCAGGCTCACGGTCACAG	NAGVTQTPKFQVLKTGQSMTLQCAQDMNHEYMSWYRQDPGMGLRLIHYSVGAGITDQGEVPNGYNVSRSTTEDFPLRLLSAAPSQTSVYFCASSHGAGDYEQYFGPGTRLTVT	TRB	F	T	F	T	F	T	TRBV6-5*01	TRBD1*01	TRBJ2-7*01	AATGCTGGTGTCACTCAGACCCCAAAATTCCAGGTCCTGAAGACAGGACAGAGCATGACACTGCAGTGTGCCCAGGATATGAACCATGAATACATGTCCTGGTATCGACAAGACCCAGGCATGGGGCTGAGGCTGATTCATTACTCAGTTGGTGCTGGTATCACTGACCAAGGAGAAGTCCCCAATGGCTACAATGTCTCCAGATCAACCACAGAGGATTTCCCGCTCAGGCTGCTGTCGGCTGCTCCCTCCCAGACATCTGTGTACTTCTGTGCCAGCAGTCACGGGGCAGGGGACTACGAGCAGTACTTCGGGCCGGGCACCAGGCTCACGGTCACAG	AATGCTGGTGTCACTCAGACCCCAAAATTCCAGGTCCTGAAGACAGGACAGAGCATGACACTGCAGTGTGCCCAGGATATGAACCATGAATACATGTCCTGGTATCGACAAGACCCAGGCATGGGGCTGAGGCTGATTCATTACTCAGTTGGTGCTGGTATCACTGACCAAGGAGAAGTCCCCAATGGCTACAATGTCTCCAGATCAACCACAGAGGATTTCCCGCTCAGGCTGCTGTCGGCTGCTCCCTCCCAGACATCTGTGTACTTCTGTGCCAGCAGTTACGGGACAGGGGNCTACGAGCAGTACTTCGGGCCGGGCACCAGGCTCACGGTCACAG	NAGVTQTPKFQVLKTGQSMTLQCAQDMNHEYMSWYRQDPGMGLRLIHYSVGAGITDQGEVPNGYNVSRSTTEDFPLRLLSAAPSQTSVYFCASSHGAGDYEQYFGPGTRLTVT	NAGVTQTPKFQVLKTGQSMTLQCAQDMNHEYMSWYRQDPGMGLRLIHYSVGAGITDQGEVPNGYNVSRSTTEDFPLRLLSAAPSQTSVYFCASSYGTGXYEQYFGPGTRLTVT	1	285	286	295	297	340	AATGCTGGTGTCACTCAGACCCCAAAATTCCAGGTCCTGAAGACAGGACAGAGCATGACACTGCAGTGTGCCCAGGATATGAACCATGAATACATGTCCTGGTATCGACAAGACCCAGGCATGGGGCTGAGGCTGATTCATTACTCAGTTGGTGCTGGTATCACTGACCAAGGAGAAGTCCCCAATGGCTACAATGTCTCCAGATCAACCACAGAGGATTTCCCGCTCAGGCTGCTGTCGGCTGCTCCCTCCCAGACATCTGTGTACTTCTGTGCCAGCAGTCAC	NAGVTQTPKFQVLKTGQSMTLQCAQDMNHEYMSWYRQDPGMGLRLIHYSVGAGITDQGEVPNGYNVSRSTTEDFPLRLLSAAPSQTSVYFCASSH	AATGCTGGTGTCACTCAGACCCCAAAATTCCAGGTCCTGAAGACAGGACAGAGCATGACACTGCAGTGTGCCCAGGATATGAACCATGAATACATGTCCTGGTATCGACAAGACCCAGGCATGGGGCTGAGGCTGATTCATTACTCAGTTGGTGCTGGTATCACTGACCAAGGAGAAGTCCCCAATGGCTACAATGTCTCCAGATCAACCACAGAGGATTTCCCGCTCAGGCTGCTGTCGGCTGCTCCCTCCCAGACATCTGTGTACTTCTGTGCCAGCAGTTAC	NAGVTQTPKFQVLKTGQSMTLQCAQDMNHEYMSWYRQDPGMGLRLIHYSVGAGITDQGEVPNGYNVSRSTTEDFPLRLLSAAPSQTSVYFCASSY	GGGGCAGGGG	GAG	GGGACAGGGG	GTG	CTACGAGCAGTACTTCGGGCCGGGCACCAGGCTCACGGTCACAG	YEQYFGPGTRLTVT	CTACGAGCAGTACTTCGGGCCGGGCACCAGGCTCACGGTCACAG	YEQYFGPGTRLTVT	AATGCTGGTGTCACTCAGACCCCAAAATTCCAGGTCCTGAAGACAGGACAGAGCATGACACTGCAGTGTGCCCAGGAT	NAGVTQTPKFQVLKTGQSMTLQCAQD	ATGAACCATGAATAC	MNHEY	ATGTCCTGGTATCGACAAGACCCAGGCATGGGGCTGAGGCTGATTCATTAC	MSWYRQDPGMGLRLIHY	TCAGTTGGTGCTGGTATC	SVGAGI
Pat_208	KW11	CAAGAAAAGGACAGCT	TCRbeta	tig00000007_CAAGAAAAGGACAGCT	1073	253	1	AATGCTGGTGTCACTCAGACCCCAAAATTCCAGGTCCTGAAGACAGGACAGAGCATGACACTGCAGTGTGCCCAGGATATGAACCATGAATACATGTCCTGGTATCGACAAGACCCAGGCATGGGGCTGAGGCTGATTCATTACTCAGTTGGTGCTGGTATCACTGACCAAGGAGAAGTCCCCAATGGCTACAATGTCTCCAGATCAACCACAGAGGATTTCCCGCTCAGGCTGCTGTCGGCTGCTCCCTCCCAGACATCTGTGTACTTCTGTGCCAGCAGTCCCCGGGGAGGCTATGGCTACACCTTCGGTTCGGGGACCAGGTTAACCGTTGTAG	NAGVTQTPKFQVLKTGQSMTLQCAQDMNHEYMSWYRQDPGMGLRLIHYSVGAGITDQGEVPNGYNVSRSTTEDFPLRLLSAAPSQTSVYFCASSPRGGYGYTFGSGTRLTVV	TRB	F	T	F	T	F	T	TRBV6-5*01	TRBD2*02	TRBJ1-2*01	AATGCTGGTGTCACTCAGACCCCAAAATTCCAGGTCCTGAAGACAGGACAGAGCATGACACTGCAGTGTGCCCAGGATATGAACCATGAATACATGTCCTGGTATCGACAAGACCCAGGCATGGGGCTGAGGCTGATTCATTACTCAGTTGGTGCTGGTATCACTGACCAAGGAGAAGTCCCCAATGGCTACAATGTCTCCAGATCAACCACAGAGGATTTCCCGCTCAGGCTGCTGTCGGCTGCTCCCTCCCAGACATCTGTGTACTTCTGTGCCAGCAGTCCCCGGGGAGGCTATGGCTACACCTTCGGTTCGGGGACCAGGTTAACCGTTGTAG	AATGCTGGTGTCACTCAGACCCCAAAATTCCAGGTCCTGAAGACAGGACAGAGCATGACACTGCAGTGTGCCCAGGATATGAACCATGAATACATGTCCTGGTATCGACAAGACCCAGGCATGGGGCTGAGGCTGATTCATTACTCAGTTGGTGCTGGTATCACTGACCAAGGAGAAGTCCCCAATGGCTACAATGTCTCCAGATCAACCACAGAGGATTTCCCGCTCAGGCTGCTGTCGGCTGCTCCCTCCCAGACATCTGTGTACTTCTGTGCCAGCAGTNNNNNGGGAGGCTATGGCTACACCTTCGGTTCGGGGACCAGGTTAACCGTTGTAG	NAGVTQTPKFQVLKTGQSMTLQCAQDMNHEYMSWYRQDPGMGLRLIHYSVGAGITDQGEVPNGYNVSRSTTEDFPLRLLSAAPSQTSVYFCASSPRGGYGYTFGSGTRLTVV	NAGVTQTPKFQVLKTGQSMTLQCAQDMNHEYMSWYRQDPGMGLRLIHYSVGAGITDQGEVPNGYNVSRSTTEDFPLRLLSAAPSQTSVYFCASSXXGGYGYTFGSGTRLTVV	1	282	288	293	294	337	AATGCTGGTGTCACTCAGACCCCAAAATTCCAGGTCCTGAAGACAGGACAGAGCATGACACTGCAGTGTGCCCAGGATATGAACCATGAATACATGTCCTGGTATCGACAAGACCCAGGCATGGGGCTGAGGCTGATTCATTACTCAGTTGGTGCTGGTATCACTGACCAAGGAGAAGTCCCCAATGGCTACAATGTCTCCAGATCAACCACAGAGGATTTCCCGCTCAGGCTGCTGTCGGCTGCTCCCTCCCAGACATCTGTGTACTTCTGTGCCAGCAGT	NAGVTQTPKFQVLKTGQSMTLQCAQDMNHEYMSWYRQDPGMGLRLIHYSVGAGITDQGEVPNGYNVSRSTTEDFPLRLLSAAPSQTSVYFCASS	AATGCTGGTGTCACTCAGACCCCAAAATTCCAGGTCCTGAAGACAGGACAGAGCATGACACTGCAGTGTGCCCAGGATATGAACCATGAATACATGTCCTGGTATCGACAAGACCCAGGCATGGGGCTGAGGCTGATTCATTACTCAGTTGGTGCTGGTATCACTGACCAAGGAGAAGTCCCCAATGGCTACAATGTCTCCAGATCAACCACAGAGGATTTCCCGCTCAGGCTGCTGTCGGCTGCTCCCTCCCAGACATCTGTGTACTTCTGTGCCAGCAGT	NAGVTQTPKFQVLKTGQSMTLQCAQDMNHEYMSWYRQDPGMGLRLIHYSVGAGITDQGEVPNGYNVSRSTTEDFPLRLLSAAPSQTSVYFCASS	GGGAGG	GG	GGGAGG	GG	CTATGGCTACACCTTCGGTTCGGGGACCAGGTTAACCGTTGTAG	YGYTFGSGTRLTVV	CTATGGCTACACCTTCGGTTCGGGGACCAGGTTAACCGTTGTAG	YGYTFGSGTRLTVV	AATGCTGGTGTCACTCAGACCCCAAAATTCCAGGTCCTGAAGACAGGACAGAGCATGACACTGCAGTGTGCCCAGGAT	NAGVTQTPKFQVLKTGQSMTLQCAQD	ATGAACCATGAATAC	MNHEY	ATGTCCTGGTATCGACAAGACCCAGGCATGGGGCTGAGGCTGATTCATTAC	MSWYRQDPGMGLRLIHY	TCAGTTGGTGCTGGTATC	SVGAGI
Pat_208	IW9	CAGATCAGTCCGAACC	TCRbeta	tig00000024_CAGATCAGTCCGAACC	837	485	1	GATACTGGAGTCTCCCAGGACCCCAGACACAAGATCACAAAGAGGGGACAGAATGTAACTTTCAGGTGTGATCCAATTTCTGAACACAACCGCCTTTATTGGTACCGACAGACCCTGGGGCAGGGCCCAGAGTTTCTGACTTACTTCCAGAATGAAGCTCAACTAGAAAAATCAAGGCTGCTCAGTGATCGGTTCTCTGCAGAGAGGCCTAAGGGATCTTTCTCCACCTTGGAGATCCAGCGCACAGAGCAGGGGGACTCGGCCATGTATCTCTGTGCCAGCAGCTTAACTTGGGACGGCCCCTCTAACTATGGCTACACCTTCGGTTCGGGGACCAGGTTAACCGTTGTAG	DTGVSQDPRHKITKRGQNVTFRCDPISEHNRLYWYRQTLGQGPEFLTYFQNEAQLEKSRLLSDRFSAERPKGSFSTLEIQRTEQGDSAMYLCASSLTWDGPSNYGYTFGSGTRLTVV	TRB	F	T	F	T	F	T	TRBV7-9*03	TRBD1*01	TRBJ1-2*01	GATACTGGAGTCTCCCAGGACCCCAGACACAAGATCACAAAGAGGGGACAGAATGTAACTTTCAGGTGTGATCCAATTTCTGAACACAACCGCCTTTATTGGTACCGACAGACCCTGGGGCAGGGCCCAGAGTTTCTGACTTACTTCCAGAATGAAGCTCAACTAGAAAAATCAAGGCTGCTCAGTGATCGGTTCTCTGCAGAGAGGCCTAAGGGATCTTTCTCCACCTTGGAGATCCAGCGCACAGAGCAGGGGGACTCGGCCATGTATCTCTGTGCCAGCAGCTTAACTTGGGACGGCCCCTCTAACTATGGCTACACCTTCGGTTCGGGGACCAGGTTAACCGTTGTAG	GATACTGGAGTCTCCCAGGACCCCAGACACAAGATCACAAAGAGGGGACAGAATGTAACTTTCAGGTGTGATCCAATTTCTGAACACAACCGCCTTTATTGGTACCGACAGACCCTGGGGCAGGGCCCAGAGTTTCTGACTTACTTCCAGAATGAAGCTCAACTAGAAAAATCAAGGCTGCTCAGTGATCGGTTCTCTGCAGAGAGGCCTAAGGGATCTTTCTCCACCTTGGAGATCCAGCGCACAGAGCAGGGGGACTCGGCCATGTATCTCTGTGCCAGCAGCTTANNNNGGGACNNNNNNNCTAACTATGGCTACACCTTCGGTTCGGGGACCAGGTTAACCGTTGTAG	DTGVSQDPRHKITKRGQNVTFRCDPISEHNRLYWYRQTLGQGPEFLTYFQNEAQLEKSRLLSDRFSAERPKGSFSTLEIQRTEQGDSAMYLCASSLTWDGPSNYGYTFGSGTRLTVV	DTGVSQDPRHKITKRGQNVTFRCDPISEHNRLYWYRQTLGQGPEFLTYFQNEAQLEKSRLLSDRFSAERPKGSFSTLEIQRTEQGDSAMYLCASSLXXDXXXNYGYTFGSGTRLTVV	1	288	293	297	305	352	GATACTGGAGTCTCCCAGGACCCCAGACACAAGATCACAAAGAGGGGACAGAATGTAACTTTCAGGTGTGATCCAATTTCTGAACACAACCGCCTTTATTGGTACCGACAGACCCTGGGGCAGGGCCCAGAGTTTCTGACTTACTTCCAGAATGAAGCTCAACTAGAAAAATCAAGGCTGCTCAGTGATCGGTTCTCTGCAGAGAGGCCTAAGGGATCTTTCTCCACCTTGGAGATCCAGCGCACAGAGCAGGGGGACTCGGCCATGTATCTCTGTGCCAGCAGCTTA	DTGVSQDPRHKITKRGQNVTFRCDPISEHNRLYWYRQTLGQGPEFLTYFQNEAQLEKSRLLSDRFSAERPKGSFSTLEIQRTEQGDSAMYLCASSL	GATACTGGAGTCTCCCAGGACCCCAGACACAAGATCACAAAGAGGGGACAGAATGTAACTTTCAGGTGTGATCCAATTTCTGAACACAACCGCCTTTATTGGTACCGACAGACCCTGGGGCAGGGCCCAGAGTTTCTGACTTACTTCCAGAATGAAGCTCAACTAGAAAAATCAAGGCTGCTCAGTGATCGGTTCTCTGCAGAGAGGCCTAAGGGATCTTTCTCCACCTTGGAGATCCAGCGCACAGAGCAGGGGGACTCGGCCATGTATCTCTGTGCCAGCAGCTTA	DTGVSQDPRHKITKRGQNVTFRCDPISEHNRLYWYRQTLGQGPEFLTYFQNEAQLEKSRLLSDRFSAERPKGSFSTLEIQRTEQGDSAMYLCASSL	GGGAC	D	GGGAC	D	CTAACTATGGCTACACCTTCGGTTCGGGGACCAGGTTAACCGTTGTAG	NYGYTFGSGTRLTVV	CTAACTATGGCTACACCTTCGGTTCGGGGACCAGGTTAACCGTTGTAG	NYGYTFGSGTRLTVV	GATACTGGAGTCTCCCAGGACCCCAGACACAAGATCACAAAGAGGGGACAGAATGTAACTTTCAGGTGTGATCCAATT	DTGVSQDPRHKITKRGQNVTFRCDPI	TCTGAACACAACCGC	SEHNR	CTTTATTGGTACCGACAGACCCTGGGGCAGGGCCCAGAGTTTCTGACTTAC	LYWYRQTLGQGPEFLTY	TTCCAGAATGAAGCTCAA	FQNEAQ
Pat_208	KW11	CATCGAAGTAAGAGAG	TCRbeta	tig00000005_CATCGAAGTAAGAGAG	1246	159	1	GATTCTGGAGTCACACAAACCCCAAAGCACCTGATCACAGCAACTGGACAGCGAGTGACGCTGAGATGCTCCCCTAGGTCTGGAGACCTCTCTGTGTACTGGTACCAACAGAGCCTGGACCAGGGCCTCCAGTTCCTCATTCAGTATTATAATGGAGAAGAGAGAGCAAAAGGAAACATTCTTGAACGATTCTCCGCACAACAGTTCCCTGACTTGCACTCTGAACTAAACCTGAGCTCTCTGGAGCTGGGGGACTCAGCTTTGTATTTCTGTGCCAGCAGCGCGCTGGGAGGGGTCCCCTCCGACGAGCAGTACTTCGGGCCGGGCACCAGGCTCACGGTCACAG	DSGVTQTPKHLITATGQRVTLRCSPRSGDLSVYWYQQSLDQGLQFLIQYYNGEERAKGNILERFSAQQFPDLHSELNLSSLELGDSALYFCASSALGGVPSDEQYFGPGTRLTVT	TRB	F	T	F	T	F	T	TRBV9*01	TRBD2*02	TRBJ2-7*01	GATTCTGGAGTCACACAAACCCCAAAGCACCTGATCACAGCAACTGGACAGCGAGTGACGCTGAGATGCTCCCCTAGGTCTGGAGACCTCTCTGTGTACTGGTACCAACAGAGCCTGGACCAGGGCCTCCAGTTCCTCATTCAGTATTATAATGGAGAAGAGAGAGCAAAAGGAAACATTCTTGAACGATTCTCCGCACAACAGTTCCCTGACTTGCACTCTGAACTAAACCTGAGCTCTCTGGAGCTGGGGGACTCAGCTTTGTATTTCTGTGCCAGCAGCGCGCTGGGAGGGGTCCCCTCCGACGAGCAGTACTTCGGGCCGGGCACCAGGCTCACGGTCACAG	GATTCTGGAGTCACACAAACCCCAAAGCACCTGATCACAGCAACTGGACAGCGAGTGACGCTGAGATGCTCCCCTAGGTCTGGAGACCTCTCTGTGTACTGGTACCAACAGAGCCTGGACCAGGGCCTCCAGTTCCTCATTCAGTATTATAATGGAGAAGAGAGAGCAAAAGGAAACATTCTTGAACGATTCTCCGCACAACAGTTCCCTGACTTGCACTCTGAACTAAACCTGAGCTCTCTGGAGCTGGGGGACTCAGCTTTGTATTTCTGTGCCAGCAGCGNNNNGGGAGGGNNNNNCTCCTACGAGCAGTACTTCGGGCCGGGCACCAGGCTCACGGTCACAG	DSGVTQTPKHLITATGQRVTLRCSPRSGDLSVYWYQQSLDQGLQFLIQYYNGEERAKGNILERFSAQQFPDLHSELNLSSLELGDSALYFCASSALGGVPSDEQYFGPGTRLTVT	DSGVTQTPKHLITATGQRVTLRCSPRSGDLSVYWYQQSLDQGLQFLIQYYNGEERAKGNILERFSAQQFPDLHSELNLSSLELGDSALYFCASSXXGGXXSYEQYFGPGTRLTVT	1	283	288	294	300	346	GATTCTGGAGTCACACAAACCCCAAAGCACCTGATCACAGCAACTGGACAGCGAGTGACGCTGAGATGCTCCCCTAGGTCTGGAGACCTCTCTGTGTACTGGTACCAACAGAGCCTGGACCAGGGCCTCCAGTTCCTCATTCAGTATTATAATGGAGAAGAGAGAGCAAAAGGAAACATTCTTGAACGATTCTCCGCACAACAGTTCCCTGACTTGCACTCTGAACTAAACCTGAGCTCTCTGGAGCTGGGGGACTCAGCTTTGTATTTCTGTGCCAGCAGCG	DSGVTQTPKHLITATGQRVTLRCSPRSGDLSVYWYQQSLDQGLQFLIQYYNGEERAKGNILERFSAQQFPDLHSELNLSSLELGDSALYFCASS	GATTCTGGAGTCACACAAACCCCAAAGCACCTGATCACAGCAACTGGACAGCGAGTGACGCTGAGATGCTCCCCTAGGTCTGGAGACCTCTCTGTGTACTGGTACCAACAGAGCCTGGACCAGGGCCTCCAGTTCCTCATTCAGTATTATAATGGAGAAGAGAGAGCAAAAGGAAACATTCTTGAACGATTCTCCGCACAACAGTTCCCTGACTTGCACTCTGAACTAAACCTGAGCTCTCTGGAGCTGGGGGACTCAGCTTTGTATTTCTGTGCCAGCAGCG	DSGVTQTPKHLITATGQRVTLRCSPRSGDLSVYWYQQSLDQGLQFLIQYYNGEERAKGNILERFSAQQFPDLHSELNLSSLELGDSALYFCASS	GGGAGGG	GG	GGGAGGG	GG	CTCCGACGAGCAGTACTTCGGGCCGGGCACCAGGCTCACGGTCACAG	SDEQYFGPGTRLTVT	CTCCTACGAGCAGTACTTCGGGCCGGGCACCAGGCTCACGGTCACAG	SYEQYFGPGTRLTVT	GATTCTGGAGTCACACAAACCCCAAAGCACCTGATCACAGCAACTGGACAGCGAGTGACGCTGAGATGCTCCCCTAGG	DSGVTQTPKHLITATGQRVTLRCSPR	TCTGGAGACCTCTCT	SGDLS	GTGTACTGGTACCAACAGAGCCTGGACCAGGGCCTCCAGTTCCTCATTCAG	VYWYQQSLDQGLQFLIQ	TATTATAATGGAGAAGAG	YYNGEE
Pat_208	KW11	CCATGTCGTATAAACG	TCRbeta	tig00000006_CCATGTCGTATAAACG	1043	501	1	GATTCTGGAGTCACACAAACCCCAAAGCACCTGATCACAGCAACTGGACAGCGAGTGACGCTGAGATGCTCCCCTAGGTCTGGAGACCTCTCTGTGTACTGGTACCAACAGAGCCTGGACCAGGGCCTCCAGTTCCTCATTCAGTATTATAATGGAGAAGAGAGAGCAAAAGGAAACATTCTTGAACGATTCTCCGCACAACAGTTCCCTGACTTGCACTCTGAACTAAACCTGAGCTCTCTGGAGCTGGGGGACTCAGCTTTGTATTTCTGTGCCAGCAGCGCAACCGACAGTTACAATGAGCAGTTCTTCGGGCCAGGGACACGGCTCACCGTGCTAG	DSGVTQTPKHLITATGQRVTLRCSPRSGDLSVYWYQQSLDQGLQFLIQYYNGEERAKGNILERFSAQQFPDLHSELNLSSLELGDSALYFCASSATDSYNEQFFGPGTRLTVL	TRB	F	T	F	T	F	T	TRBV9*01	TRBD1*01	TRBJ2-1*01	GATTCTGGAGTCACACAAACCCCAAAGCACCTGATCACAGCAACTGGACAGCGAGTGACGCTGAGATGCTCCCCTAGGTCTGGAGACCTCTCTGTGTACTGGTACCAACAGAGCCTGGACCAGGGCCTCCAGTTCCTCATTCAGTATTATAATGGAGAAGAGAGAGCAAAAGGAAACATTCTTGAACGATTCTCCGCACAACAGTTCCCTGACTTGCACTCTGAACTAAACCTGAGCTCTCTGGAGCTGGGGGACTCAGCTTTGTATTTCTGTGCCAGCAGCGCAACCGACAGTTACAATGAGCAGTTCTTCGGGCCAGGGACACGGCTCACCGTGCTAG	GATTCTGGAGTCACACAAACCCCAAAGCACCTGATCACAGCAACTGGACAGCGAGTGACGCTGAGATGCTCCCCTAGGTCTGGAGACCTCTCTGTGTACTGGTACCAACAGAGCCTGGACCAGGGCCTCCAGTTCCTCATTCAGTATTATAATGGAGAAGAGAGAGCAAAAGGAAACATTCTTGAACGATTCTCCGCACAACAGTTCCCTGACTTGCACTCTGAACTAAACCTGAGCTCTCTGGAGCTGGGGGACTCAGCTTTGTATTTCTGTGCCAGCAGCGNNNNNGACAGNTACAATGAGCAGTTCTTCGGGCCAGGGACACGGCTCACCGTGCTAG	DSGVTQTPKHLITATGQRVTLRCSPRSGDLSVYWYQQSLDQGLQFLIQYYNGEERAKGNILERFSAQQFPDLHSELNLSSLELGDSALYFCASSATDSYNEQFFGPGTRLTVL	DSGVTQTPKHLITATGQRVTLRCSPRSGDLSVYWYQQSLDQGLQFLIQYYNGEERAKGNILERFSAQQFPDLHSELNLSSLELGDSALYFCASSXXDXYNEQFFGPGTRLTVL	1	283	289	293	295	340	GATTCTGGAGTCACACAAACCCCAAAGCACCTGATCACAGCAACTGGACAGCGAGTGACGCTGAGATGCTCCCCTAGGTCTGGAGACCTCTCTGTGTACTGGTACCAACAGAGCCTGGACCAGGGCCTCCAGTTCCTCATTCAGTATTATAATGGAGAAGAGAGAGCAAAAGGAAACATTCTTGAACGATTCTCCGCACAACAGTTCCCTGACTTGCACTCTGAACTAAACCTGAGCTCTCTGGAGCTGGGGGACTCAGCTTTGTATTTCTGTGCCAGCAGCG	DSGVTQTPKHLITATGQRVTLRCSPRSGDLSVYWYQQSLDQGLQFLIQYYNGEERAKGNILERFSAQQFPDLHSELNLSSLELGDSALYFCASS	GATTCTGGAGTCACACAAACCCCAAAGCACCTGATCACAGCAACTGGACAGCGAGTGACGCTGAGATGCTCCCCTAGGTCTGGAGACCTCTCTGTGTACTGGTACCAACAGAGCCTGGACCAGGGCCTCCAGTTCCTCATTCAGTATTATAATGGAGAAGAGAGAGCAAAAGGAAACATTCTTGAACGATTCTCCGCACAACAGTTCCCTGACTTGCACTCTGAACTAAACCTGAGCTCTCTGGAGCTGGGGGACTCAGCTTTGTATTTCTGTGCCAGCAGCG	DSGVTQTPKHLITATGQRVTLRCSPRSGDLSVYWYQQSLDQGLQFLIQYYNGEERAKGNILERFSAQQFPDLHSELNLSSLELGDSALYFCASS	GACAG	D	GACAG	D	TACAATGAGCAGTTCTTCGGGCCAGGGACACGGCTCACCGTGCTAG	YNEQFFGPGTRLTVL	TACAATGAGCAGTTCTTCGGGCCAGGGACACGGCTCACCGTGCTAG	YNEQFFGPGTRLTVL	GATTCTGGAGTCACACAAACCCCAAAGCACCTGATCACAGCAACTGGACAGCGAGTGACGCTGAGATGCTCCCCTAGG	DSGVTQTPKHLITATGQRVTLRCSPR	TCTGGAGACCTCTCT	SGDLS	GTGTACTGGTACCAACAGAGCCTGGACCAGGGCCTCCAGTTCCTCATTCAG	VYWYQQSLDQGLQFLIQ	TATTATAATGGAGAAGAG	YYNGEE
Pat_208	KW11	CCCAATCCAGACGCCT	TCRbeta	tig00000449_CCCAATCCAGACGCCT	1074	147	1	AATGCTGGTGTCACTCAGACCCCAAAATTCCAGGTCCTGAAGACAGGACAGAGCATGACACTGCAGTGTGCCCAGGATATGAACCATGAATACATGTCCTGGTATCGACAAGACCCAGGCATGGGGCTGAGGCTGATTCATTACTCAGTTGGTGCTGGTATCACTGACCAAGGAGAAGTCCCCAATGGCTACAATGTCTCCAGATCAACCACAGAGGATTTCCCGCTCAGGCTGCTGTCGGCTGCTCCCTCCCAGACATCTGTGTACTTCTGTGCCAGCAGTTACGGGGGCTCCTACGAGCAGTACTTCGGGCCGGGCACCAGGCTCACGGTCACAG	NAGVTQTPKFQVLKTGQSMTLQCAQDMNHEYMSWYRQDPGMGLRLIHYSVGAGITDQGEVPNGYNVSRSTTEDFPLRLLSAAPSQTSVYFCASSYGGSYEQYFGPGTRLTVT	TRB	F	T	F	T	F	T	TRBV6-5*01	TRBD1*01	TRBJ2-7*01	AATGCTGGTGTCACTCAGACCCCAAAATTCCAGGTCCTGAAGACAGGACAGAGCATGACACTGCAGTGTGCCCAGGATATGAACCATGAATACATGTCCTGGTATCGACAAGACCCAGGCATGGGGCTGAGGCTGATTCATTACTCAGTTGGTGCTGGTATCACTGACCAAGGAGAAGTCCCCAATGGCTACAATGTCTCCAGATCAACCACAGAGGATTTCCCGCTCAGGCTGCTGTCGGCTGCTCCCTCCCAGACATCTGTGTACTTCTGTGCCAGCAGTTACGGGGGCTCCTACGAGCAGTACTTCGGGCCGGGCACCAGGCTCACGGTCACAG	AATGCTGGTGTCACTCAGACCCCAAAATTCCAGGTCCTGAAGACAGGACAGAGCATGACACTGCAGTGTGCCCAGGATATGAACCATGAATACATGTCCTGGTATCGACAAGACCCAGGCATGGGGCTGAGGCTGATTCATTACTCAGTTGGTGCTGGTATCACTGACCAAGGAGAAGTCCCCAATGGCTACAATGTCTCCAGATCAACCACAGAGGATTTCCCGCTCAGGCTGCTGTCGGCTGCTCCCTCCCAGACATCTGTGTACTTCTGTGCCAGCAGTTACGGGGGCTCCTACGAGCAGTACTTCGGGCCGGGCACCAGGCTCACGGTCACAG	NAGVTQTPKFQVLKTGQSMTLQCAQDMNHEYMSWYRQDPGMGLRLIHYSVGAGITDQGEVPNGYNVSRSTTEDFPLRLLSAAPSQTSVYFCASSYGGSYEQYFGPGTRLTVT	NAGVTQTPKFQVLKTGQSMTLQCAQDMNHEYMSWYRQDPGMGLRLIHYSVGAGITDQGEVPNGYNVSRSTTEDFPLRLLSAAPSQTSVYFCASSYGGSYEQYFGPGTRLTVT	1	285	286	290	291	337	AATGCTGGTGTCACTCAGACCCCAAAATTCCAGGTCCTGAAGACAGGACAGAGCATGACACTGCAGTGTGCCCAGGATATGAACCATGAATACATGTCCTGGTATCGACAAGACCCAGGCATGGGGCTGAGGCTGATTCATTACTCAGTTGGTGCTGGTATCACTGACCAAGGAGAAGTCCCCAATGGCTACAATGTCTCCAGATCAACCACAGAGGATTTCCCGCTCAGGCTGCTGTCGGCTGCTCCCTCCCAGACATCTGTGTACTTCTGTGCCAGCAGTTAC	NAGVTQTPKFQVLKTGQSMTLQCAQDMNHEYMSWYRQDPGMGLRLIHYSVGAGITDQGEVPNGYNVSRSTTEDFPLRLLSAAPSQTSVYFCASSY	AATGCTGGTGTCACTCAGACCCCAAAATTCCAGGTCCTGAAGACAGGACAGAGCATGACACTGCAGTGTGCCCAGGATATGAACCATGAATACATGTCCTGGTATCGACAAGACCCAGGCATGGGGCTGAGGCTGATTCATTACTCAGTTGGTGCTGGTATCACTGACCAAGGAGAAGTCCCCAATGGCTACAATGTCTCCAGATCAACCACAGAGGATTTCCCGCTCAGGCTGCTGTCGGCTGCTCCCTCCCAGACATCTGTGTACTTCTGTGCCAGCAGTTAC	NAGVTQTPKFQVLKTGQSMTLQCAQDMNHEYMSWYRQDPGMGLRLIHYSVGAGITDQGEVPNGYNVSRSTTEDFPLRLLSAAPSQTSVYFCASSY	GGGGG	GG	GGGGG	GG	CTCCTACGAGCAGTACTTCGGGCCGGGCACCAGGCTCACGGTCACAG	SYEQYFGPGTRLTVT	CTCCTACGAGCAGTACTTCGGGCCGGGCACCAGGCTCACGGTCACAG	SYEQYFGPGTRLTVT	AATGCTGGTGTCACTCAGACCCCAAAATTCCAGGTCCTGAAGACAGGACAGAGCATGACACTGCAGTGTGCCCAGGAT	NAGVTQTPKFQVLKTGQSMTLQCAQD	ATGAACCATGAATAC	MNHEY	ATGTCCTGGTATCGACAAGACCCAGGCATGGGGCTGAGGCTGATTCATTAC	MSWYRQDPGMGLRLIHY	TCAGTTGGTGCTGGTATC	SVGAGI
Pat_208	KW11	CCTACCACACACATGT	TCRbeta	tig00000002_CCTACCACACACATGT	1638	436	1	GACGCTGGAGTCACCCAAAGTCCCACACACCTGATCAAAACGAGAGGACAGCAAGTGACTCTGAGATGCTCTCCTATCTCTGGGCACAAGAGTGTGTCCTGGTACCAACAGGTCCTGGGTCAGGGGCCCCAGTTTATCTTTCAGTATTATGAGAAAGAAGAGAGAGGAAGAGGAAACTTCCCTGATCGATTCTCAGCTCGCCAGTTCCCTAACTATAGCTCTGAGCTGAATGTGAACGCCTTGTTGCTGGGGGACTCGGCCCTCTATCTCTGTGCCAGCTCTTGGACCTCCTCCTACGAGCAGTACTTCGGGCCGGGCACCAGGCTCACGGTCACAG	DAGVTQSPTHLIKTRGQQVTLRCSPISGHKSVSWYQQVLGQGPQFIFQYYEKEERGRGNFPDRFSARQFPNYSSELNVNALLLGDSALYLCASSWTSSYEQYFGPGTRLTVT	TRB	F	T	F	T	F	T	TRBV5-5*01		TRBJ2-7*01	GACGCTGGAGTCACCCAAAGTCCCACACACCTGATCAAAACGAGAGGACAGCAAGTGACTCTGAGATGCTCTCCTATCTCTGGGCACAAGAGTGTGTCCTGGTACCAACAGGTCCTGGGTCAGGGGCCCCAGTTTATCTTTCAGTATTATGAGAAAGAAGAGAGAGGAAGAGGAAACTTCCCTGATCGATTCTCAGCTCGCCAGTTCCCTAACTATAGCTCTGAGCTGAATGTGAACGCCTTGTTGCTGGGGGACTCGGCCCTCTATCTCTGTGCCAGCTCTTGGACCTCCTCCTACGAGCAGTACTTCGGGCCGGGCACCAGGCTCACGGTCACAG	GACGCTGGAGTCACCCAAAGTCCCACACACCTGATCAAAACGAGAGGACAGCAAGTGACTCTGAGATGCTCTCCTATCTCTGGGCACAAGAGTGTGTCCTGGTACCAACAGGTCCTGGGTCAGGGGCCCCAGTTTATCTTTCAGTATTATGAGAAAGAAGAGAGAGGAAGAGGAAACTTCCCTGATCGATTCTCAGCTCGCCAGTTCCCTAACTATAGCTCTGAGCTGAATGTGAACGCCTTGTTGCTGGGGGACTCGGCCCTGTATCTCTGTGCCAGCNNNNNNNNNNNCTCCTACGAGCAGTACTTCGGGCCGGGCACCAGGCTCACGGTCACAG	DAGVTQSPTHLIKTRGQQVTLRCSPISGHKSVSWYQQVLGQGPQFIFQYYEKEERGRGNFPDRFSARQFPNYSSELNVNALLLGDSALYLCASSWTSSYEQYFGPGTRLTVT	DAGVTQSPTHLIKTRGQQVTLRCSPISGHKSVSWYQQVLGQGPQFIFQYYEKEERGRGNFPDRFSARQFPNYSSELNVNALLLGDSALYLCASXXXXSYEQYFGPGTRLTVT	1	279			291	337	GACGCTGGAGTCACCCAAAGTCCCACACACCTGATCAAAACGAGAGGACAGCAAGTGACTCTGAGATGCTCTCCTATCTCTGGGCACAAGAGTGTGTCCTGGTACCAACAGGTCCTGGGTCAGGGGCCCCAGTTTATCTTTCAGTATTATGAGAAAGAAGAGAGAGGAAGAGGAAACTTCCCTGATCGATTCTCAGCTCGCCAGTTCCCTAACTATAGCTCTGAGCTGAATGTGAACGCCTTGTTGCTGGGGGACTCGGCCCTCTATCTCTGTGCCAGC	DAGVTQSPTHLIKTRGQQVTLRCSPISGHKSVSWYQQVLGQGPQFIFQYYEKEERGRGNFPDRFSARQFPNYSSELNVNALLLGDSALYLCAS	GACGCTGGAGTCACCCAAAGTCCCACACACCTGATCAAAACGAGAGGACAGCAAGTGACTCTGAGATGCTCTCCTATCTCTGGGCACAAGAGTGTGTCCTGGTACCAACAGGTCCTGGGTCAGGGGCCCCAGTTTATCTTTCAGTATTATGAGAAAGAAGAGAGAGGAAGAGGAAACTTCCCTGATCGATTCTCAGCTCGCCAGTTCCCTAACTATAGCTCTGAGCTGAATGTGAACGCCTTGTTGCTGGGGGACTCGGCCCTGTATCTCTGTGCCAGC	DAGVTQSPTHLIKTRGQQVTLRCSPISGHKSVSWYQQVLGQGPQFIFQYYEKEERGRGNFPDRFSARQFPNYSSELNVNALLLGDSALYLCAS					CTCCTACGAGCAGTACTTCGGGCCGGGCACCAGGCTCACGGTCACAG	SYEQYFGPGTRLTVT	CTCCTACGAGCAGTACTTCGGGCCGGGCACCAGGCTCACGGTCACAG	SYEQYFGPGTRLTVT	GACGCTGGAGTCACCCAAAGTCCCACACACCTGATCAAAACGAGAGGACAGCAAGTGACTCTGAGATGCTCTCCTATC	DAGVTQSPTHLIKTRGQQVTLRCSPI	TCTGGGCACAAGAGT	SGHKS	GTGTCCTGGTACCAACAGGTCCTGGGTCAGGGGCCCCAGTTTATCTTTCAG	VSWYQQVLGQGPQFIFQ	TATTATGAGAAAGAAGAG	YYEKEE
Pat_208	KW11	CCTCTGAAGGCACATG	TCRbeta	tig00000001_CCTCTGAAGGCACATG	1481	129	1	AATGCTGGTGTCACTCAGACCCCAAAATTCCGCATCCTGAAGATAGGACAGAGCATGACACTGCAGTGTGCCCAGGATATGAACCATAACTACATGTACTGGTATCGACAAGACCCAGGCATGGGGCTGAAGCTGATTTATTATTCAGTTGGTGCTGGTATCACTGATAAAGGAGAAGTCCCGAATGGCTACAACGTCTCCAGATCAACCACAGAGTATTTCCCGCTCAGGCTGGAGTTGGCTGCTCCCTCCCAGACATCTGTGTACTTCTGTGCCAGCAGGCCGGGACAATACTACGAGCAGTACTTCGGGCCGGGCACCAGGCTCACGGTCACAG	NAGVTQTPKFRILKIGQSMTLQCAQDMNHNYMYWYRQDPGMGLKLIYYSVGAGITDKGEVPNGYNVSRSTTEYFPLRLELAAPSQTSVYFCASRPGQYYEQYFGPGTRLTVT	TRB	F	T	F	T	F	T	TRBV6-6*03	TRBD1*01	TRBJ2-7*01	AATGCTGGTGTCACTCAGACCCCAAAATTCCGCATCCTGAAGATAGGACAGAGCATGACACTGCAGTGTGCCCAGGATATGAACCATAACTACATGTACTGGTATCGACAAGACCCAGGCATGGGGCTGAAGCTGATTTATTATTCAGTTGGTGCTGGTATCACTGATAAAGGAGAAGTCCCGAATGGCTACAACGTCTCCAGATCAACCACAGAGTATTTCCCGCTCAGGCTGGAGTTGGCTGCTCCCTCCCAGACATCTGTGTACTTCTGTGCCAGCAGGCCGGGACAATACTACGAGCAGTACTTCGGGCCGGGCACCAGGCTCACGGTCACAG	AATGCTGGTGTCACTCAGACCCCAAAATTCCGCATCCTGAAGATAGGACAGAGCATGACACTGCAGTGTGCCCAGGATATGAACCATAACTACATGTACTGGTATCGACAAGACCCAGGCATGGGGCTGAAGCTGATTTATTATTCAGTTGGTGCTGGTATCACTGATAAAGGAGAAGTCCCGAATGGCTACAACGTCTCCAGATCAACCACAGAGGATTTCCCGCTCAGGCTGGAGTTGGCTGCTCCCTCCCAGACATCTGTGTACTTCTGTGCCAGCAGNNNGGGACANNNCTACGAGCAGTACTTCGGGCCGGGCACCAGGCTCACGGTCACAG	NAGVTQTPKFRILKIGQSMTLQCAQDMNHNYMYWYRQDPGMGLKLIYYSVGAGITDKGEVPNGYNVSRSTTEYFPLRLELAAPSQTSVYFCASRPGQYYEQYFGPGTRLTVT	NAGVTQTPKFRILKIGQSMTLQCAQDMNHNYMYWYRQDPGMGLKLIYYSVGAGITDKGEVPNGYNVSRSTTEDFPLRLELAAPSQTSVYFCASXXGXXYEQYFGPGTRLTVT	1	281	285	290	294	337	AATGCTGGTGTCACTCAGACCCCAAAATTCCGCATCCTGAAGATAGGACAGAGCATGACACTGCAGTGTGCCCAGGATATGAACCATAACTACATGTACTGGTATCGACAAGACCCAGGCATGGGGCTGAAGCTGATTTATTATTCAGTTGGTGCTGGTATCACTGATAAAGGAGAAGTCCCGAATGGCTACAACGTCTCCAGATCAACCACAGAGTATTTCCCGCTCAGGCTGGAGTTGGCTGCTCCCTCCCAGACATCTGTGTACTTCTGTGCCAGCAG	NAGVTQTPKFRILKIGQSMTLQCAQDMNHNYMYWYRQDPGMGLKLIYYSVGAGITDKGEVPNGYNVSRSTTEYFPLRLELAAPSQTSVYFCAS	AATGCTGGTGTCACTCAGACCCCAAAATTCCGCATCCTGAAGATAGGACAGAGCATGACACTGCAGTGTGCCCAGGATATGAACCATAACTACATGTACTGGTATCGACAAGACCCAGGCATGGGGCTGAAGCTGATTTATTATTCAGTTGGTGCTGGTATCACTGATAAAGGAGAAGTCCCGAATGGCTACAACGTCTCCAGATCAACCACAGAGGATTTCCCGCTCAGGCTGGAGTTGGCTGCTCCCTCCCAGACATCTGTGTACTTCTGTGCCAGCAG	NAGVTQTPKFRILKIGQSMTLQCAQDMNHNYMYWYRQDPGMGLKLIYYSVGAGITDKGEVPNGYNVSRSTTEDFPLRLELAAPSQTSVYFCAS	GGGACA	G	GGGACA	G	CTACGAGCAGTACTTCGGGCCGGGCACCAGGCTCACGGTCACAG	YEQYFGPGTRLTVT	CTACGAGCAGTACTTCGGGCCGGGCACCAGGCTCACGGTCACAG	YEQYFGPGTRLTVT	AATGCTGGTGTCACTCAGACCCCAAAATTCCGCATCCTGAAGATAGGACAGAGCATGACACTGCAGTGTGCCCAGGAT	NAGVTQTPKFRILKIGQSMTLQCAQD	ATGAACCATAACTAC	MNHNY	ATGTACTGGTATCGACAAGACCCAGGCATGGGGCTGAAGCTGATTTATTAT	MYWYRQDPGMGLKLIYY	TCAGTTGGTGCTGGTATC	SVGAGI
Pat_208	KW11	CGACTTCGTCTCCATC	TCRbeta	tig00000002_CGACTTCGTCTCCATC	1069	334	1	GAACCTGAAGTCACCCAGACTCCCAGCCATCAGGTCACACAGATGGGACAGGAAGTGATCTTGCGCTGTGTCCCCATCTCTAATCACTTATACTTCTATTGGTACAGACAAATCTTGGGGCAGAAAGTCGAGTTTCTGGTTTCCTTTTATAATAATGAAATCTCAGAGAAGTCTGAAATATTCGATGATCAATTCTCAGTTGAAAGGCCTGATGGATCAAATTTCACTCTGAAGATCCGGTCCACAAAGCTGGAGGACTCAGCCATGTACTTCTGTGCCAGCAGTGAAAATTTGTCAGGCAACTATGGCTACACCTTCGGTTCGGGGACCAGGTTAACCGTTGTAG	EPEVTQTPSHQVTQMGQEVILRCVPISNHLYFYWYRQILGQKVEFLVSFYNNEISEKSEIFDDQFSVERPDGSNFTLKIRSTKLEDSAMYFCASSENLSGNYGYTFGSGTRLTVV	TRB	F	T	F	T	F	T	TRBV2*01		TRBJ1-2*01	GAACCTGAAGTCACCCAGACTCCCAGCCATCAGGTCACACAGATGGGACAGGAAGTGATCTTGCGCTGTGTCCCCATCTCTAATCACTTATACTTCTATTGGTACAGACAAATCTTGGGGCAGAAAGTCGAGTTTCTGGTTTCCTTTTATAATAATGAAATCTCAGAGAAGTCTGAAATATTCGATGATCAATTCTCAGTTGAAAGGCCTGATGGATCAAATTTCACTCTGAAGATCCGGTCCACAAAGCTGGAGGACTCAGCCATGTACTTCTGTGCCAGCAGTGAAAATTTGTCAGGCAACTATGGCTACACCTTCGGTTCGGGGACCAGGTTAACCGTTGTAG	GAACCTGAAGTCACCCAGACTCCCAGCCATCAGGTCACACAGATGGGACAGGAAGTGATCTTGCGCTGTGTCCCCATCTCTAATCACTTATACTTCTATTGGTACAGACAAATCTTGGGGCAGAAAGTCGAGTTTCTGGTTTCCTTTTATAATAATGAAATCTCAGAGAAGTCTGAAATATTCGATGATCAATTCTCAGTTGAAAGGCCTGATGGATCAAATTTCACTCTGAAGATCCGGTCCACAAAGCTGGAGGACTCAGCCATGTACTTCTGTGCCAGCAGTGAANNNNNNNNNNNNAACTATGGCTACACCTTCGGTTCGGGGACCAGGTTAACCGTTGTAG	EPEVTQTPSHQVTQMGQEVILRCVPISNHLYFYWYRQILGQKVEFLVSFYNNEISEKSEIFDDQFSVERPDGSNFTLKIRSTKLEDSAMYFCASSENLSGNYGYTFGSGTRLTVV	EPEVTQTPSHQVTQMGQEVILRCVPISNHLYFYWYRQILGQKVEFLVSFYNNEISEKSEIFDDQFSVERPDGSNFTLKIRSTKLEDSAMYFCASSEXXXXNYGYTFGSGTRLTVV	1	288			301	346	GAACCTGAAGTCACCCAGACTCCCAGCCATCAGGTCACACAGATGGGACAGGAAGTGATCTTGCGCTGTGTCCCCATCTCTAATCACTTATACTTCTATTGGTACAGACAAATCTTGGGGCAGAAAGTCGAGTTTCTGGTTTCCTTTTATAATAATGAAATCTCAGAGAAGTCTGAAATATTCGATGATCAATTCTCAGTTGAAAGGCCTGATGGATCAAATTTCACTCTGAAGATCCGGTCCACAAAGCTGGAGGACTCAGCCATGTACTTCTGTGCCAGCAGTGAA	EPEVTQTPSHQVTQMGQEVILRCVPISNHLYFYWYRQILGQKVEFLVSFYNNEISEKSEIFDDQFSVERPDGSNFTLKIRSTKLEDSAMYFCASSE	GAACCTGAAGTCACCCAGACTCCCAGCCATCAGGTCACACAGATGGGACAGGAAGTGATCTTGCGCTGTGTCCCCATCTCTAATCACTTATACTTCTATTGGTACAGACAAATCTTGGGGCAGAAAGTCGAGTTTCTGGTTTCCTTTTATAATAATGAAATCTCAGAGAAGTCTGAAATATTCGATGATCAATTCTCAGTTGAAAGGCCTGATGGATCAAATTTCACTCTGAAGATCCGGTCCACAAAGCTGGAGGACTCAGCCATGTACTTCTGTGCCAGCAGTGAA	EPEVTQTPSHQVTQMGQEVILRCVPISNHLYFYWYRQILGQKVEFLVSFYNNEISEKSEIFDDQFSVERPDGSNFTLKIRSTKLEDSAMYFCASSE					AACTATGGCTACACCTTCGGTTCGGGGACCAGGTTAACCGTTGTAG	NYGYTFGSGTRLTVV	AACTATGGCTACACCTTCGGTTCGGGGACCAGGTTAACCGTTGTAG	NYGYTFGSGTRLTVV	GAACCTGAAGTCACCCAGACTCCCAGCCATCAGGTCACACAGATGGGACAGGAAGTGATCTTGCGCTGTGTCCCCATC	EPEVTQTPSHQVTQMGQEVILRCVPI	TCTAATCACTTATAC	SNHLY	TTCTATTGGTACAGACAAATCTTGGGGCAGAAAGTCGAGTTTCTGGTTTCC	FYWYRQILGQKVEFLVS	TTTTATAATAATGAAATC	FYNNEI
Pat_208	TW10	CGATGGCAGTTTGCGT	TCRbeta	tig00000045_CGATGGCAGTTTGCGT	1187	96	1	AAGGCTGGAGTCACTCAAACTCCAAGATATCTGATCAAAACGAGAGGACAGCAAGTGACACTGAGCTGCTCCCCTATCTCTGGGCATAGGAGTGTATCCTGGTACCAACAGACCCCAGGACAGGGCCTTCAGTTCCTCTTTGAATACTTCAGTGAGACACAGAGAAACAAAGGAAACTTCCCTGGTCGATTCTCAGGGCGCCAGTTCTCTAACTCTCGCTCTGAGATGAATGTGAGCACCTTGGAGCTGGGGGACTCGGCCCTTTATCTTTGCGCCAGCAGCTTAGAGGGGGCAAAGTCACCCCTCCACTTTGGGAACGGGACCAGGCTCACTGTGACAG	KAGVTQTPRYLIKTRGQQVTLSCSPISGHRSVSWYQQTPGQGLQFLFEYFSETQRNKGNFPGRFSGRQFSNSRSEMNVSTLELGDSALYLCASSLEGAKSPLHFGNGTRLTVT	TRB	F	T	F	T	F	T	TRBV5-1*01	TRBD1*01	TRBJ1-6*02	AAGGCTGGAGTCACTCAAACTCCAAGATATCTGATCAAAACGAGAGGACAGCAAGTGACACTGAGCTGCTCCCCTATCTCTGGGCATAGGAGTGTATCCTGGTACCAACAGACCCCAGGACAGGGCCTTCAGTTCCTCTTTGAATACTTCAGTGAGACACAGAGAAACAAAGGAAACTTCCCTGGTCGATTCTCAGGGCGCCAGTTCTCTAACTCTCGCTCTGAGATGAATGTGAGCACCTTGGAGCTGGGGGACTCGGCCCTTTATCTTTGCGCCAGCAGCTTAGAGGGGGCAAAGTCACCCCTCCACTTTGGGAACGGGACCAGGCTCACTGTGACAG	AAGGCTGGAGTCACTCAAACTCCAAGATATCTGATCAAAACGAGAGGACAGCAAGTGACACTGAGCTGCTCCCCTATCTCTGGGCATAGGAGTGTATCCTGGTACCAACAGACCCCAGGACAGGGCCTTCAGTTCCTCTTTGAATACTTCAGTGAGACACAGAGAAACAAAGGAAACTTCCCTGGTCGATTCTCAGGGCGCCAGTTCTCTAACTCTCGCTCTGAGATGAATGTGAGCACCTTGGAGCTGGGGGACTCGGCCCTTTATCTTTGCGCCAGCAGCTTNNAGGGGGCNNNNTCACCCCTCCACTTTGGGAACGGGACCAGGCTCACTGTGACAG	KAGVTQTPRYLIKTRGQQVTLSCSPISGHRSVSWYQQTPGQGLQFLFEYFSETQRNKGNFPGRFSGRQFSNSRSEMNVSTLELGDSALYLCASSLEGAKSPLHFGNGTRLTVT	KAGVTQTPRYLIKTRGQQVTLSCSPISGHRSVSWYQQTPGQGLQFLFEYFSETQRNKGNFPGRFSGRQFSNSRSEMNVSTLELGDSALYLCASSXXGAXSPLHFGNGTRLTVT	1	284	287	293	298	340	AAGGCTGGAGTCACTCAAACTCCAAGATATCTGATCAAAACGAGAGGACAGCAAGTGACACTGAGCTGCTCCCCTATCTCTGGGCATAGGAGTGTATCCTGGTACCAACAGACCCCAGGACAGGGCCTTCAGTTCCTCTTTGAATACTTCAGTGAGACACAGAGAAACAAAGGAAACTTCCCTGGTCGATTCTCAGGGCGCCAGTTCTCTAACTCTCGCTCTGAGATGAATGTGAGCACCTTGGAGCTGGGGGACTCGGCCCTTTATCTTTGCGCCAGCAGCTT	KAGVTQTPRYLIKTRGQQVTLSCSPISGHRSVSWYQQTPGQGLQFLFEYFSETQRNKGNFPGRFSGRQFSNSRSEMNVSTLELGDSALYLCASS	AAGGCTGGAGTCACTCAAACTCCAAGATATCTGATCAAAACGAGAGGACAGCAAGTGACACTGAGCTGCTCCCCTATCTCTGGGCATAGGAGTGTATCCTGGTACCAACAGACCCCAGGACAGGGCCTTCAGTTCCTCTTTGAATACTTCAGTGAGACACAGAGAAACAAAGGAAACTTCCCTGGTCGATTCTCAGGGCGCCAGTTCTCTAACTCTCGCTCTGAGATGAATGTGAGCACCTTGGAGCTGGGGGACTCGGCCCTTTATCTTTGCGCCAGCAGCTT	KAGVTQTPRYLIKTRGQQVTLSCSPISGHRSVSWYQQTPGQGLQFLFEYFSETQRNKGNFPGRFSGRQFSNSRSEMNVSTLELGDSALYLCASS	AGGGGGC	GA	AGGGGGC	GA	TCACCCCTCCACTTTGGGAACGGGACCAGGCTCACTGTGACAG	SPLHFGNGTRLTVT	TCACCCCTCCACTTTGGGAACGGGACCAGGCTCACTGTGACAG	SPLHFGNGTRLTVT	AAGGCTGGAGTCACTCAAACTCCAAGATATCTGATCAAAACGAGAGGACAGCAAGTGACACTGAGCTGCTCCCCTATC	KAGVTQTPRYLIKTRGQQVTLSCSPI	TCTGGGCATAGGAGT	SGHRS	GTATCCTGGTACCAACAGACCCCAGGACAGGGCCTTCAGTTCCTCTTTGAA	VSWYQQTPGQGLQFLFE	TACTTCAGTGAGACACAG	YFSETQ
Pat_208	KW11	CTAACTTAGGTAGCCA	TCRbeta	tig00000011_CTAACTTAGGTAGCCA	1010	347	1	AATGCTGGTGTCACTCAGACCCCAAAATTCCGCATCCTGAAGATAGGACAGAGCATGACACTGCAGTGTACCCAGGATATGAACCATAACTACATGTACTGGTATCGACAAGACTCAGGCATGGGGCTGAAGCTGATTTATTATTCAGTTGGTGCTGGTATCACTGATAAAGGAGAAGTCCCGAATGGCTACAACGTCTCCAGATCAACCACAGAGGATTTCCCGCTCAGGCTGGAGTTGGCTGCTCCCTCCCAGACATCTGTGTACTTCTGTGCCAGCAGAACCCGGGACAGTTTACCGAACACTGAAGCTTTCTTTGGACAAGGCACCAGACTCACAGTTGTAG	NAGVTQTPKFRILKIGQSMTLQCTQDMNHNYMYWYRQDSGMGLKLIYYSVGAGITDKGEVPNGYNVSRSTTEDFPLRLELAAPSQTSVYFCASRTRDSLPNTEAFFGQGTRLTVV	TRB	F	T	F	T	F	T	TRBV6-6*01	TRBD1*01	TRBJ1-1*01	AATGCTGGTGTCACTCAGACCCCAAAATTCCGCATCCTGAAGATAGGACAGAGCATGACACTGCAGTGTACCCAGGATATGAACCATAACTACATGTACTGGTATCGACAAGACTCAGGCATGGGGCTGAAGCTGATTTATTATTCAGTTGGTGCTGGTATCACTGATAAAGGAGAAGTCCCGAATGGCTACAACGTCTCCAGATCAACCACAGAGGATTTCCCGCTCAGGCTGGAGTTGGCTGCTCCCTCCCAGACATCTGTGTACTTCTGTGCCAGCAGAACCCGGGACAGTTTACCGAACACTGAAGCTTTCTTTGGACAAGGCACCAGACTCACAGTTGTAG	AATGCTGGTGTCACTCAGACCCCAAAATTCCGCATCCTGAAGATAGGACAGAGCATGACACTGCAGTGTACCCAGGATATGAACCATAACTACATGTACTGGTATCGACAAGACCCAGGCATGGGGCTGAAGCTGATTTATTATTCAGTTGGTGCTGGTATCACTGATAAAGGAGAAGTCCCGAATGGCTACAACGTCTCCAGATCAACCACAGAGGATTTCCCGCTCAGGCTGGAGTTGGCTGCTCCCTCCCAGACATCTGTGTACTTCTGTGCCAGCAGNNNNNGGGACAGNNNNNNGAACACTGAAGCTTTCTTTGGACAAGGCACCAGACTCACAGTTGTAG	NAGVTQTPKFRILKIGQSMTLQCTQDMNHNYMYWYRQDSGMGLKLIYYSVGAGITDKGEVPNGYNVSRSTTEDFPLRLELAAPSQTSVYFCASRTRDSLPNTEAFFGQGTRLTVV	NAGVTQTPKFRILKIGQSMTLQCTQDMNHNYMYWYRQDPGMGLKLIYYSVGAGITDKGEVPNGYNVSRSTTEDFPLRLELAAPSQTSVYFCASXXXDXXXNTEAFFGQGTRLTVV	1	281	287	293	300	346	AATGCTGGTGTCACTCAGACCCCAAAATTCCGCATCCTGAAGATAGGACAGAGCATGACACTGCAGTGTACCCAGGATATGAACCATAACTACATGTACTGGTATCGACAAGACTCAGGCATGGGGCTGAAGCTGATTTATTATTCAGTTGGTGCTGGTATCACTGATAAAGGAGAAGTCCCGAATGGCTACAACGTCTCCAGATCAACCACAGAGGATTTCCCGCTCAGGCTGGAGTTGGCTGCTCCCTCCCAGACATCTGTGTACTTCTGTGCCAGCAG	NAGVTQTPKFRILKIGQSMTLQCTQDMNHNYMYWYRQDSGMGLKLIYYSVGAGITDKGEVPNGYNVSRSTTEDFPLRLELAAPSQTSVYFCAS	AATGCTGGTGTCACTCAGACCCCAAAATTCCGCATCCTGAAGATAGGACAGAGCATGACACTGCAGTGTACCCAGGATATGAACCATAACTACATGTACTGGTATCGACAAGACCCAGGCATGGGGCTGAAGCTGATTTATTATTCAGTTGGTGCTGGTATCACTGATAAAGGAGAAGTCCCGAATGGCTACAACGTCTCCAGATCAACCACAGAGGATTTCCCGCTCAGGCTGGAGTTGGCTGCTCCCTCCCAGACATCTGTGTACTTCTGTGCCAGCAG	NAGVTQTPKFRILKIGQSMTLQCTQDMNHNYMYWYRQDPGMGLKLIYYSVGAGITDKGEVPNGYNVSRSTTEDFPLRLELAAPSQTSVYFCAS	GGGACAG	D	GGGACAG	D	GAACACTGAAGCTTTCTTTGGACAAGGCACCAGACTCACAGTTGTAG	NTEAFFGQGTRLTVV	GAACACTGAAGCTTTCTTTGGACAAGGCACCAGACTCACAGTTGTAG	NTEAFFGQGTRLTVV	AATGCTGGTGTCACTCAGACCCCAAAATTCCGCATCCTGAAGATAGGACAGAGCATGACACTGCAGTGTACCCAGGAT	NAGVTQTPKFRILKIGQSMTLQCTQD	ATGAACCATAACTAC	MNHNY	ATGTACTGGTATCGACAAGACTCAGGCATGGGGCTGAAGCTGATTTATTAT	MYWYRQDSGMGLKLIYY	TCAGTTGGTGCTGGTATC	SVGAGI
Pat_208	KW11	CTACCCAGTATAATGG	TCRbeta	tig00000067_CTACCCAGTATAATGG	687	71	1	AATGCTGGTGTCACTCAGACCCCAAAATTCCAGGTCCTGAAGACAGGACAGAGCATGACACTGCAGTGTGCCCAGGATATGAACCATGAATACATGTCCTGGTATCGACAAGACCCAGGCATGGGGCTGAGGCTGATTCATTACTCAGTTGGTGCTGGTATCACTGACCAAGGAGAAGTCCCCAATGGCTACAATGTCTCCAGATCAACCACAGAGGATTTCCCGCTCAGGCTGCTGTCGGCTGCTCCCTCCCAGACATCTGTGTACTTCTGTGCCAGCAGTTACGGGGGCTCCTACGAGCAGTACTTCGGGCCGGGCACCAGGCTCACGGTCACAG	NAGVTQTPKFQVLKTGQSMTLQCAQDMNHEYMSWYRQDPGMGLRLIHYSVGAGITDQGEVPNGYNVSRSTTEDFPLRLLSAAPSQTSVYFCASSYGGSYEQYFGPGTRLTVT	TRB	F	T	F	T	F	T	TRBV6-5*01	TRBD1*01	TRBJ2-7*01	AATGCTGGTGTCACTCAGACCCCAAAATTCCAGGTCCTGAAGACAGGACAGAGCATGACACTGCAGTGTGCCCAGGATATGAACCATGAATACATGTCCTGGTATCGACAAGACCCAGGCATGGGGCTGAGGCTGATTCATTACTCAGTTGGTGCTGGTATCACTGACCAAGGAGAAGTCCCCAATGGCTACAATGTCTCCAGATCAACCACAGAGGATTTCCCGCTCAGGCTGCTGTCGGCTGCTCCCTCCCAGACATCTGTGTACTTCTGTGCCAGCAGTTACGGGGGCTCCTACGAGCAGTACTTCGGGCCGGGCACCAGGCTCACGGTCACAG	AATGCTGGTGTCACTCAGACCCCAAAATTCCAGGTCCTGAAGACAGGACAGAGCATGACACTGCAGTGTGCCCAGGATATGAACCATGAATACATGTCCTGGTATCGACAAGACCCAGGCATGGGGCTGAGGCTGATTCATTACTCAGTTGGTGCTGGTATCACTGACCAAGGAGAAGTCCCCAATGGCTACAATGTCTCCAGATCAACCACAGAGGATTTCCCGCTCAGGCTGCTGTCGGCTGCTCCCTCCCAGACATCTGTGTACTTCTGTGCCAGCAGTTACGGGGGCTCCTACGAGCAGTACTTCGGGCCGGGCACCAGGCTCACGGTCACAG	NAGVTQTPKFQVLKTGQSMTLQCAQDMNHEYMSWYRQDPGMGLRLIHYSVGAGITDQGEVPNGYNVSRSTTEDFPLRLLSAAPSQTSVYFCASSYGGSYEQYFGPGTRLTVT	NAGVTQTPKFQVLKTGQSMTLQCAQDMNHEYMSWYRQDPGMGLRLIHYSVGAGITDQGEVPNGYNVSRSTTEDFPLRLLSAAPSQTSVYFCASSYGGSYEQYFGPGTRLTVT	1	285	286	290	291	337	AATGCTGGTGTCACTCAGACCCCAAAATTCCAGGTCCTGAAGACAGGACAGAGCATGACACTGCAGTGTGCCCAGGATATGAACCATGAATACATGTCCTGGTATCGACAAGACCCAGGCATGGGGCTGAGGCTGATTCATTACTCAGTTGGTGCTGGTATCACTGACCAAGGAGAAGTCCCCAATGGCTACAATGTCTCCAGATCAACCACAGAGGATTTCCCGCTCAGGCTGCTGTCGGCTGCTCCCTCCCAGACATCTGTGTACTTCTGTGCCAGCAGTTAC	NAGVTQTPKFQVLKTGQSMTLQCAQDMNHEYMSWYRQDPGMGLRLIHYSVGAGITDQGEVPNGYNVSRSTTEDFPLRLLSAAPSQTSVYFCASSY	AATGCTGGTGTCACTCAGACCCCAAAATTCCAGGTCCTGAAGACAGGACAGAGCATGACACTGCAGTGTGCCCAGGATATGAACCATGAATACATGTCCTGGTATCGACAAGACCCAGGCATGGGGCTGAGGCTGATTCATTACTCAGTTGGTGCTGGTATCACTGACCAAGGAGAAGTCCCCAATGGCTACAATGTCTCCAGATCAACCACAGAGGATTTCCCGCTCAGGCTGCTGTCGGCTGCTCCCTCCCAGACATCTGTGTACTTCTGTGCCAGCAGTTAC	NAGVTQTPKFQVLKTGQSMTLQCAQDMNHEYMSWYRQDPGMGLRLIHYSVGAGITDQGEVPNGYNVSRSTTEDFPLRLLSAAPSQTSVYFCASSY	GGGGG	GG	GGGGG	GG	CTCCTACGAGCAGTACTTCGGGCCGGGCACCAGGCTCACGGTCACAG	SYEQYFGPGTRLTVT	CTCCTACGAGCAGTACTTCGGGCCGGGCACCAGGCTCACGGTCACAG	SYEQYFGPGTRLTVT	AATGCTGGTGTCACTCAGACCCCAAAATTCCAGGTCCTGAAGACAGGACAGAGCATGACACTGCAGTGTGCCCAGGAT	NAGVTQTPKFQVLKTGQSMTLQCAQD	ATGAACCATGAATAC	MNHEY	ATGTCCTGGTATCGACAAGACCCAGGCATGGGGCTGAGGCTGATTCATTAC	MSWYRQDPGMGLRLIHY	TCAGTTGGTGCTGGTATC	SVGAGI
Pat_208	KW11	CTAGCCTCACGTGAGA	TCRbeta	tig00000169_CTAGCCTCACGTGAGA	1122	75	1	AATGCTGGTGTCACTCAGACCCCAAAATTCCAGGTCCTGAAGACAGGACAGAGCATGACACTGCAGTGTGCCCAGGATATGAACCATGAATACATGTCCTGGTATCGACAAGACCCAGGCATGGGGCTGAGGCTGATTCATTACTCAGTTGGTGCTGGTATCACTGACCAAGGAGAAGTCCCCAATGGCTACAATGTCTCCAGATCAACCACAGAGGATTTCCCGCTCAGGCTGCTGTCGGCTGCTCCCTCCCAGACATCTGTGTACTTCTGTGCCAGCAGGCCCTTTGCGAGTGGGGGCGATGGCTACACCTTCGGTTCGGGGACCAGGTTAACCGTTGTAG	NAGVTQTPKFQVLKTGQSMTLQCAQDMNHEYMSWYRQDPGMGLRLIHYSVGAGITDQGEVPNGYNVSRSTTEDFPLRLLSAAPSQTSVYFCASRPFASGGDGYTFGSGTRLTVV	TRB	F	T	F	T	F	T	TRBV6-5*01	TRBD1*01	TRBJ1-2*01	AATGCTGGTGTCACTCAGACCCCAAAATTCCAGGTCCTGAAGACAGGACAGAGCATGACACTGCAGTGTGCCCAGGATATGAACCATGAATACATGTCCTGGTATCGACAAGACCCAGGCATGGGGCTGAGGCTGATTCATTACTCAGTTGGTGCTGGTATCACTGACCAAGGAGAAGTCCCCAATGGCTACAATGTCTCCAGATCAACCACAGAGGATTTCCCGCTCAGGCTGCTGTCGGCTGCTCCCTCCCAGACATCTGTGTACTTCTGTGCCAGCAGGCCCTTTGCGAGTGGGGGCGATGGCTACACCTTCGGTTCGGGGACCAGGTTAACCGTTGTAG	AATGCTGGTGTCACTCAGACCCCAAAATTCCAGGTCCTGAAGACAGGACAGAGCATGACACTGCAGTGTGCCCAGGATATGAACCATGAATACATGTCCTGGTATCGACAAGACCCAGGCATGGGGCTGAGGCTGATTCATTACTCAGTTGGTGCTGGTATCACTGACCAAGGAGAAGTCCCCAATGGCTACAATGTCTCCAGATCAACCACAGAGGATTTCCCGCTCAGGCTGCTGTCGGCTGCTCCCTCCCAGACATCTGTGTACTTCTGTGCCAGCAGNNNNNNNNNNNNNGGGGGCNATGGCTACACCTTCGGTTCGGGGACCAGGTTAACCGTTGTAG	NAGVTQTPKFQVLKTGQSMTLQCAQDMNHEYMSWYRQDPGMGLRLIHYSVGAGITDQGEVPNGYNVSRSTTEDFPLRLLSAAPSQTSVYFCASRPFASGGDGYTFGSGTRLTVV	NAGVTQTPKFQVLKTGQSMTLQCAQDMNHEYMSWYRQDPGMGLRLIHYSVGAGITDQGEVPNGYNVSRSTTEDFPLRLLSAAPSQTSVYFCASXXXXXGGXGYTFGSGTRLTVV	1	281	295	300	302	343	AATGCTGGTGTCACTCAGACCCCAAAATTCCAGGTCCTGAAGACAGGACAGAGCATGACACTGCAGTGTGCCCAGGATATGAACCATGAATACATGTCCTGGTATCGACAAGACCCAGGCATGGGGCTGAGGCTGATTCATTACTCAGTTGGTGCTGGTATCACTGACCAAGGAGAAGTCCCCAATGGCTACAATGTCTCCAGATCAACCACAGAGGATTTCCCGCTCAGGCTGCTGTCGGCTGCTCCCTCCCAGACATCTGTGTACTTCTGTGCCAGCAG	NAGVTQTPKFQVLKTGQSMTLQCAQDMNHEYMSWYRQDPGMGLRLIHYSVGAGITDQGEVPNGYNVSRSTTEDFPLRLLSAAPSQTSVYFCAS	AATGCTGGTGTCACTCAGACCCCAAAATTCCAGGTCCTGAAGACAGGACAGAGCATGACACTGCAGTGTGCCCAGGATATGAACCATGAATACATGTCCTGGTATCGACAAGACCCAGGCATGGGGCTGAGGCTGATTCATTACTCAGTTGGTGCTGGTATCACTGACCAAGGAGAAGTCCCCAATGGCTACAATGTCTCCAGATCAACCACAGAGGATTTCCCGCTCAGGCTGCTGTCGGCTGCTCCCTCCCAGACATCTGTGTACTTCTGTGCCAGCAG	NAGVTQTPKFQVLKTGQSMTLQCAQDMNHEYMSWYRQDPGMGLRLIHYSVGAGITDQGEVPNGYNVSRSTTEDFPLRLLSAAPSQTSVYFCAS	GGGGGC	GG	GGGGGC	GG	ATGGCTACACCTTCGGTTCGGGGACCAGGTTAACCGTTGTAG	GYTFGSGTRLTVV	ATGGCTACACCTTCGGTTCGGGGACCAGGTTAACCGTTGTAG	GYTFGSGTRLTVV	AATGCTGGTGTCACTCAGACCCCAAAATTCCAGGTCCTGAAGACAGGACAGAGCATGACACTGCAGTGTGCCCAGGAT	NAGVTQTPKFQVLKTGQSMTLQCAQD	ATGAACCATGAATAC	MNHEY	ATGTCCTGGTATCGACAAGACCCAGGCATGGGGCTGAGGCTGATTCATTAC	MSWYRQDPGMGLRLIHY	TCAGTTGGTGCTGGTATC	SVGAGI
Pat_208	KW11	CTGAAGTTCACAATGC	TCRbeta	tig00000001_CTGAAGTTCACAATGC	1244	213	1	GATACTGGAGTCTCCCAGGACCCCAGACACAAGATCACAAAGAGGGGACAGAATGTAACTTTCAGGTGTGATCCAATTTCTGAACACAACCGCCTTTATTGGTACCGACAGACCCTGGGGCAGGGCCCAGAGTTTCTGACTTACTTCCAGAATGAAGCTCAACTAGAAAAATCAAGGCTGCTCAGTGATCGGTTCTCTGCAGAGAGGCCTAAGGGATCTTTCTCCACCTTGGAGATCCAGCGCACAGAGCAGGGGGACTCGGCCATGTATCTCTGTGCCAGCAGCTTTTCTGATCAGGAGGGTTATGGCTACACCTTCGGTTCGGGGACCAGGTTAACCGTTGTAG	DTGVSQDPRHKITKRGQNVTFRCDPISEHNRLYWYRQTLGQGPEFLTYFQNEAQLEKSRLLSDRFSAERPKGSFSTLEIQRTEQGDSAMYLCASSFSDQEGYGYTFGSGTRLTVV	TRB	F	T	F	T	F	T	TRBV7-9*03	TRBD2*02	TRBJ1-2*01	GATACTGGAGTCTCCCAGGACCCCAGACACAAGATCACAAAGAGGGGACAGAATGTAACTTTCAGGTGTGATCCAATTTCTGAACACAACCGCCTTTATTGGTACCGACAGACCCTGGGGCAGGGCCCAGAGTTTCTGACTTACTTCCAGAATGAAGCTCAACTAGAAAAATCAAGGCTGCTCAGTGATCGGTTCTCTGCAGAGAGGCCTAAGGGATCTTTCTCCACCTTGGAGATCCAGCGCACAGAGCAGGGGGACTCGGCCATGTATCTCTGTGCCAGCAGCTTTTCTGATCAGGAGGGTTATGGCTACACCTTCGGTTCGGGGACCAGGTTAACCGTTGTAG	GATACTGGAGTCTCCCAGGACCCCAGACACAAGATCACAAAGAGGGGACAGAATGTAACTTTCAGGTGTGATCCAATTTCTGAACACAACCGCCTTTATTGGTACCGACAGACCCTGGGGCAGGGCCCAGAGTTTCTGACTTACTTCCAGAATGAAGCTCAACTAGAAAAATCAAGGCTGCTCAGTGATCGGTTCTCTGCAGAGAGGCCTAAGGGATCTTTCTCCACCTTGGAGATCCAGCGCACAGAGCAGGGGGACTCGGCCATGTATCTCTGTGCCAGCAGCTTNNNNNNNNNGGAGGGNTATGGCTACACCTTCGGTTCGGGGACCAGGTTAACCGTTGTAG	DTGVSQDPRHKITKRGQNVTFRCDPISEHNRLYWYRQTLGQGPEFLTYFQNEAQLEKSRLLSDRFSAERPKGSFSTLEIQRTEQGDSAMYLCASSFSDQEGYGYTFGSGTRLTVV	DTGVSQDPRHKITKRGQNVTFRCDPISEHNRLYWYRQTLGQGPEFLTYFQNEAQLEKSRLLSDRFSAERPKGSFSTLEIQRTEQGDSAMYLCASSXXXXEGYGYTFGSGTRLTVV	1	287	297	302	304	346	GATACTGGAGTCTCCCAGGACCCCAGACACAAGATCACAAAGAGGGGACAGAATGTAACTTTCAGGTGTGATCCAATTTCTGAACACAACCGCCTTTATTGGTACCGACAGACCCTGGGGCAGGGCCCAGAGTTTCTGACTTACTTCCAGAATGAAGCTCAACTAGAAAAATCAAGGCTGCTCAGTGATCGGTTCTCTGCAGAGAGGCCTAAGGGATCTTTCTCCACCTTGGAGATCCAGCGCACAGAGCAGGGGGACTCGGCCATGTATCTCTGTGCCAGCAGCTT	DTGVSQDPRHKITKRGQNVTFRCDPISEHNRLYWYRQTLGQGPEFLTYFQNEAQLEKSRLLSDRFSAERPKGSFSTLEIQRTEQGDSAMYLCASS	GATACTGGAGTCTCCCAGGACCCCAGACACAAGATCACAAAGAGGGGACAGAATGTAACTTTCAGGTGTGATCCAATTTCTGAACACAACCGCCTTTATTGGTACCGACAGACCCTGGGGCAGGGCCCAGAGTTTCTGACTTACTTCCAGAATGAAGCTCAACTAGAAAAATCAAGGCTGCTCAGTGATCGGTTCTCTGCAGAGAGGCCTAAGGGATCTTTCTCCACCTTGGAGATCCAGCGCACAGAGCAGGGGGACTCGGCCATGTATCTCTGTGCCAGCAGCTT	DTGVSQDPRHKITKRGQNVTFRCDPISEHNRLYWYRQTLGQGPEFLTYFQNEAQLEKSRLLSDRFSAERPKGSFSTLEIQRTEQGDSAMYLCASS	GGAGGG	EG	GGAGGG	EG	TATGGCTACACCTTCGGTTCGGGGACCAGGTTAACCGTTGTAG	YGYTFGSGTRLTVV	TATGGCTACACCTTCGGTTCGGGGACCAGGTTAACCGTTGTAG	YGYTFGSGTRLTVV	GATACTGGAGTCTCCCAGGACCCCAGACACAAGATCACAAAGAGGGGACAGAATGTAACTTTCAGGTGTGATCCAATT	DTGVSQDPRHKITKRGQNVTFRCDPI	TCTGAACACAACCGC	SEHNR	CTTTATTGGTACCGACAGACCCTGGGGCAGGGCCCAGAGTTTCTGACTTAC	LYWYRQTLGQGPEFLTY	TTCCAGAATGAAGCTCAA	FQNEAQ
Pat_208	KW11	CTGGTCTGTATAGGTA	TCRbeta	tig00000001_CTGGTCTGTATAGGTA	1683	276	1	AATGCTGGTGTCACTCAGACCCCAAAATTCCGCATCCTGAAGATAGGACAGAGCATGACACTGCAGTGTACCCAGGATATGAACCATAACTACATGTACTGGTATCGACAAGACTCAGGCATGGGGCTGAAGCTGATTTATTATTCAGTTGGTGCTGGTATCACTGATAAAGGAGAAGTCCCGAATGGCTACAACGTCTCCAGATCAACCACAGAGGATTTCCCGCTCAGGCTGGAGTTGGCTGCTCCCTCCCAGACATCTGTGTACTTCTGTGCCAGCAGCCTACTACACGGGAAGAACACTGAAGCTTTCTTTGGACAAGGCACCAGACTCACAGTTGTAG	NAGVTQTPKFRILKIGQSMTLQCTQDMNHNYMYWYRQDSGMGLKLIYYSVGAGITDKGEVPNGYNVSRSTTEDFPLRLELAAPSQTSVYFCASSLLHGKNTEAFFGQGTRLTVV	TRB	F	T	F	T	F	T	TRBV6-6*01	TRBD2*02	TRBJ1-1*01	AATGCTGGTGTCACTCAGACCCCAAAATTCCGCATCCTGAAGATAGGACAGAGCATGACACTGCAGTGTACCCAGGATATGAACCATAACTACATGTACTGGTATCGACAAGACTCAGGCATGGGGCTGAAGCTGATTTATTATTCAGTTGGTGCTGGTATCACTGATAAAGGAGAAGTCCCGAATGGCTACAACGTCTCCAGATCAACCACAGAGGATTTCCCGCTCAGGCTGGAGTTGGCTGCTCCCTCCCAGACATCTGTGTACTTCTGTGCCAGCAGCCTACTACACGGGAAGAACACTGAAGCTTTCTTTGGACAAGGCACCAGACTCACAGTTGTAG	AATGCTGGTGTCACTCAGACCCCAAAATTCCGCATCCTGAAGATAGGACAGAGCATGACACTGCAGTGTACCCAGGATATGAACCATAACTACATGTACTGGTATCGACAAGACCCAGGCATGGGGCTGAAGCTGATTTATTATTCAGTTGGTGCTGGTATCACTGATAAAGGAGAAGTCCCGAATGGCTACAACGTCTCCAGATCAACCACAGAGGATTTCCCGCTCAGGCTGGAGTTGGCTGCTCCCTCCCAGACATCTGTGTACTTCTGTGCCAGCAGNNNNNNNNNCGGGANGAACACTGAAGCTTTCTTTGGACAAGGCACCAGACTCACAGTTGTAG	NAGVTQTPKFRILKIGQSMTLQCTQDMNHNYMYWYRQDSGMGLKLIYYSVGAGITDKGEVPNGYNVSRSTTEDFPLRLELAAPSQTSVYFCASSLLHGKNTEAFFGQGTRLTVV	NAGVTQTPKFRILKIGQSMTLQCTQDMNHNYMYWYRQDPGMGLKLIYYSVGAGITDKGEVPNGYNVSRSTTEDFPLRLELAAPSQTSVYFCASXXXXGXNTEAFFGQGTRLTVV	1	281	291	295	297	343	AATGCTGGTGTCACTCAGACCCCAAAATTCCGCATCCTGAAGATAGGACAGAGCATGACACTGCAGTGTACCCAGGATATGAACCATAACTACATGTACTGGTATCGACAAGACTCAGGCATGGGGCTGAAGCTGATTTATTATTCAGTTGGTGCTGGTATCACTGATAAAGGAGAAGTCCCGAATGGCTACAACGTCTCCAGATCAACCACAGAGGATTTCCCGCTCAGGCTGGAGTTGGCTGCTCCCTCCCAGACATCTGTGTACTTCTGTGCCAGCAG	NAGVTQTPKFRILKIGQSMTLQCTQDMNHNYMYWYRQDSGMGLKLIYYSVGAGITDKGEVPNGYNVSRSTTEDFPLRLELAAPSQTSVYFCAS	AATGCTGGTGTCACTCAGACCCCAAAATTCCGCATCCTGAAGATAGGACAGAGCATGACACTGCAGTGTACCCAGGATATGAACCATAACTACATGTACTGGTATCGACAAGACCCAGGCATGGGGCTGAAGCTGATTTATTATTCAGTTGGTGCTGGTATCACTGATAAAGGAGAAGTCCCGAATGGCTACAACGTCTCCAGATCAACCACAGAGGATTTCCCGCTCAGGCTGGAGTTGGCTGCTCCCTCCCAGACATCTGTGTACTTCTGTGCCAGCAG	NAGVTQTPKFRILKIGQSMTLQCTQDMNHNYMYWYRQDPGMGLKLIYYSVGAGITDKGEVPNGYNVSRSTTEDFPLRLELAAPSQTSVYFCAS	CGGGA	G	CGGGA	G	GAACACTGAAGCTTTCTTTGGACAAGGCACCAGACTCACAGTTGTAG	NTEAFFGQGTRLTVV	GAACACTGAAGCTTTCTTTGGACAAGGCACCAGACTCACAGTTGTAG	NTEAFFGQGTRLTVV	AATGCTGGTGTCACTCAGACCCCAAAATTCCGCATCCTGAAGATAGGACAGAGCATGACACTGCAGTGTACCCAGGAT	NAGVTQTPKFRILKIGQSMTLQCTQD	ATGAACCATAACTAC	MNHNY	ATGTACTGGTATCGACAAGACTCAGGCATGGGGCTGAAGCTGATTTATTAT	MYWYRQDSGMGLKLIYY	TCAGTTGGTGCTGGTATC	SVGAGI
Pat_208	KW11	GACCAATCAATGACCT	TCRbeta	tig00000006_GACCAATCAATGACCT	1107	500	1	GACACTGAAGTTACCCAGACACCAAAACACCTGGTCATGGGAATGACAAATAAGAAGTCTTTGAAATGTGAACAACATATGGGGCACAGGGCTATGTATTGGTACAAGCAGAAAGCTAAGAAGCCACCGGAGCTCATGTTTGTCTACAGCTATGAGAAACTCTCTATAAATGAAAGTGTGCCAAGTCGCTTCTCACCTGAATGCCCCAACAGCTCTCTCTTAAACCTTCACCTACACGCCCTGCAGCCAGAAGACTCAGCCCTGTATCTCTGCGCCAGCAGCCAAGGGCAGAGTACCTACGAGCAGTACTTCGGGCCGGGCACCAGGCTCACGGTCACAG	DTEVTQTPKHLVMGMTNKKSLKCEQHMGHRAMYWYKQKAKKPPELMFVYSYEKLSINESVPSRFSPECPNSSLLNLHLHALQPEDSALYLCASSQGQSTYEQYFGPGTRLTVT	TRB	F	T	F	T	F	T	TRBV4-1*01		TRBJ2-7*01	GACACTGAAGTTACCCAGACACCAAAACACCTGGTCATGGGAATGACAAATAAGAAGTCTTTGAAATGTGAACAACATATGGGGCACAGGGCTATGTATTGGTACAAGCAGAAAGCTAAGAAGCCACCGGAGCTCATGTTTGTCTACAGCTATGAGAAACTCTCTATAAATGAAAGTGTGCCAAGTCGCTTCTCACCTGAATGCCCCAACAGCTCTCTCTTAAACCTTCACCTACACGCCCTGCAGCCAGAAGACTCAGCCCTGTATCTCTGCGCCAGCAGCCAAGGGCAGAGTACCTACGAGCAGTACTTCGGGCCGGGCACCAGGCTCACGGTCACAG	GACACTGAAGTTACCCAGACACCAAAACACCTGGTCATGGGAATGACAAATAAGAAGTCTTTGAAATGTGAACAACATATGGGGCACAGGGCTATGTATTGGTACAAGCAGAAAGCTAAGAAGCCACCGGAGCTCATGTTTGTCTACAGCTATGAGAAACTCTCTATAAATGAAAGTGTGCCAAGTCGCTTCTCACCTGAATGCCCCAACAGCTCTCTCTTAAACCTTCACCTACACGCCCTGCAGCCAGAAGACTCAGCCCTGTATCTCTGCGCCAGCAGCCAAGNNNNNNNNNCCTACGAGCAGTACTTCGGGCCGGGCACCAGGCTCACGGTCACAG	DTEVTQTPKHLVMGMTNKKSLKCEQHMGHRAMYWYKQKAKKPPELMFVYSYEKLSINESVPSRFSPECPNSSLLNLHLHALQPEDSALYLCASSQGQSTYEQYFGPGTRLTVT	DTEVTQTPKHLVMGMTNKKSLKCEQHMGHRAMYWYKQKAKKPPELMFVYSYEKLSINESVPSRFSPECPNSSLLNLHLHALQPEDSALYLCASSQXXXXYEQYFGPGTRLTVT	1	286			296	340	GACACTGAAGTTACCCAGACACCAAAACACCTGGTCATGGGAATGACAAATAAGAAGTCTTTGAAATGTGAACAACATATGGGGCACAGGGCTATGTATTGGTACAAGCAGAAAGCTAAGAAGCCACCGGAGCTCATGTTTGTCTACAGCTATGAGAAACTCTCTATAAATGAAAGTGTGCCAAGTCGCTTCTCACCTGAATGCCCCAACAGCTCTCTCTTAAACCTTCACCTACACGCCCTGCAGCCAGAAGACTCAGCCCTGTATCTCTGCGCCAGCAGCCAAG	DTEVTQTPKHLVMGMTNKKSLKCEQHMGHRAMYWYKQKAKKPPELMFVYSYEKLSINESVPSRFSPECPNSSLLNLHLHALQPEDSALYLCASSQ	GACACTGAAGTTACCCAGACACCAAAACACCTGGTCATGGGAATGACAAATAAGAAGTCTTTGAAATGTGAACAACATATGGGGCACAGGGCTATGTATTGGTACAAGCAGAAAGCTAAGAAGCCACCGGAGCTCATGTTTGTCTACAGCTATGAGAAACTCTCTATAAATGAAAGTGTGCCAAGTCGCTTCTCACCTGAATGCCCCAACAGCTCTCTCTTAAACCTTCACCTACACGCCCTGCAGCCAGAAGACTCAGCCCTGTATCTCTGCGCCAGCAGCCAAG	DTEVTQTPKHLVMGMTNKKSLKCEQHMGHRAMYWYKQKAKKPPELMFVYSYEKLSINESVPSRFSPECPNSSLLNLHLHALQPEDSALYLCASSQ					CCTACGAGCAGTACTTCGGGCCGGGCACCAGGCTCACGGTCACAG	YEQYFGPGTRLTVT	CCTACGAGCAGTACTTCGGGCCGGGCACCAGGCTCACGGTCACAG	YEQYFGPGTRLTVT	GACACTGAAGTTACCCAGACACCAAAACACCTGGTCATGGGAATGACAAATAAGAAGTCTTTGAAATGTGAACAACAT	DTEVTQTPKHLVMGMTNKKSLKCEQH	ATGGGGCACAGGGCT	MGHRA	ATGTATTGGTACAAGCAGAAAGCTAAGAAGCCACCGGAGCTCATGTTTGTC	MYWYKQKAKKPPELMFV	TACAGCTATGAGAAACTC	YSYEKL
Pat_208	KW11	GATCGATAGACAAGCC	TCRbeta	tig00000007_GATCGATAGACAAGCC	1028	38	1	GATTCTGGAGTCACACAAACCCCAAAGCACCTGATCACAGCAACTGGACAGCGAGTGACGCTGAGATGCTCCCCTAGGTCTGGAGACCTCTCTGTGTACTGGTACCAACAGAGCCTGGACCAGGGCCTCCAGTTCCTCATTCAGTATTATAATGGAGAAGAGAGAGCAAAAGGAAACATTCTTGAACGATTCTCCGCACAACAGTTCCCTGACTTGCACTCTGAACTAAACCTGAGCTCTCTGGAGCTGGGGGACTCAGCTTTGTATTTCTGTGCCAGCAGCGTAGTGGCTAGTTCGCCAGATACGCAGTATTTTGGCCCAGGCACCCGGCTGACAGTGCTCG	DSGVTQTPKHLITATGQRVTLRCSPRSGDLSVYWYQQSLDQGLQFLIQYYNGEERAKGNILERFSAQQFPDLHSELNLSSLELGDSALYFCASSVVASSPDTQYFGPGTRLTVL	TRB	F	T	F	T	F	T	TRBV9*01		TRBJ2-3*01	GATTCTGGAGTCACACAAACCCCAAAGCACCTGATCACAGCAACTGGACAGCGAGTGACGCTGAGATGCTCCCCTAGGTCTGGAGACCTCTCTGTGTACTGGTACCAACAGAGCCTGGACCAGGGCCTCCAGTTCCTCATTCAGTATTATAATGGAGAAGAGAGAGCAAAAGGAAACATTCTTGAACGATTCTCCGCACAACAGTTCCCTGACTTGCACTCTGAACTAAACCTGAGCTCTCTGGAGCTGGGGGACTCAGCTTTGTATTTCTGTGCCAGCAGCGTAGTGGCTAGTTCGCCAGATACGCAGTATTTTGGCCCAGGCACCCGGCTGACAGTGCTCG	GATTCTGGAGTCACACAAACCCCAAAGCACCTGATCACAGCAACTGGACAGCGAGTGACGCTGAGATGCTCCCCTAGGTCTGGAGACCTCTCTGTGTACTGGTACCAACAGAGCCTGGACCAGGGCCTCCAGTTCCTCATTCAGTATTATAATGGAGAAGAGAGAGCAAAAGGAAACATTCTTGAACGATTCTCCGCACAACAGTTCCCTGACTTGCACTCTGAACTAAACCTGAGCTCTCTGGAGCTGGGGGACTCAGCTTTGTATTTCTGTGCCAGCAGCGTAGNNNNNNNNNNNNCAGATACGCAGTATTTTGGCCCAGGCACCCGGCTGACAGTGCTCG	DSGVTQTPKHLITATGQRVTLRCSPRSGDLSVYWYQQSLDQGLQFLIQYYNGEERAKGNILERFSAQQFPDLHSELNLSSLELGDSALYFCASSVVASSPDTQYFGPGTRLTVL	DSGVTQTPKHLITATGQRVTLRCSPRSGDLSVYWYQQSLDQGLQFLIQYYNGEERAKGNILERFSAQQFPDLHSELNLSSLELGDSALYFCASSVXXXXXDTQYFGPGTRLTVL	1	286			299	343	GATTCTGGAGTCACACAAACCCCAAAGCACCTGATCACAGCAACTGGACAGCGAGTGACGCTGAGATGCTCCCCTAGGTCTGGAGACCTCTCTGTGTACTGGTACCAACAGAGCCTGGACCAGGGCCTCCAGTTCCTCATTCAGTATTATAATGGAGAAGAGAGAGCAAAAGGAAACATTCTTGAACGATTCTCCGCACAACAGTTCCCTGACTTGCACTCTGAACTAAACCTGAGCTCTCTGGAGCTGGGGGACTCAGCTTTGTATTTCTGTGCCAGCAGCGTAG	DSGVTQTPKHLITATGQRVTLRCSPRSGDLSVYWYQQSLDQGLQFLIQYYNGEERAKGNILERFSAQQFPDLHSELNLSSLELGDSALYFCASSV	GATTCTGGAGTCACACAAACCCCAAAGCACCTGATCACAGCAACTGGACAGCGAGTGACGCTGAGATGCTCCCCTAGGTCTGGAGACCTCTCTGTGTACTGGTACCAACAGAGCCTGGACCAGGGCCTCCAGTTCCTCATTCAGTATTATAATGGAGAAGAGAGAGCAAAAGGAAACATTCTTGAACGATTCTCCGCACAACAGTTCCCTGACTTGCACTCTGAACTAAACCTGAGCTCTCTGGAGCTGGGGGACTCAGCTTTGTATTTCTGTGCCAGCAGCGTAG	DSGVTQTPKHLITATGQRVTLRCSPRSGDLSVYWYQQSLDQGLQFLIQYYNGEERAKGNILERFSAQQFPDLHSELNLSSLELGDSALYFCASSV					CAGATACGCAGTATTTTGGCCCAGGCACCCGGCTGACAGTGCTCG	DTQYFGPGTRLTVL	CAGATACGCAGTATTTTGGCCCAGGCACCCGGCTGACAGTGCTCG	DTQYFGPGTRLTVL	GATTCTGGAGTCACACAAACCCCAAAGCACCTGATCACAGCAACTGGACAGCGAGTGACGCTGAGATGCTCCCCTAGG	DSGVTQTPKHLITATGQRVTLRCSPR	TCTGGAGACCTCTCT	SGDLS	GTGTACTGGTACCAACAGAGCCTGGACCAGGGCCTCCAGTTCCTCATTCAG	VYWYQQSLDQGLQFLIQ	TATTATAATGGAGAAGAG	YYNGEE
Pat_208	KW11	GGACAGACATTGGGCC	TCRbeta	tig00000326_GGACAGACATTGGGCC	1162	269	1	AATGCTGGTGTCACTCAGACCCCAAAATTCCAGGTCCTGAAGACAGGACAGAGCATGACACTGCAGTGTGCCCAGGATATGAACCATGAATACATGTCCTGGTATCGACAAGACCCAGGCATGGGGCTGAGGCTGATTCATTACTCAGTTGGTGCTGGTATCACTGACCAAGGAGAAGTCCCCAATGGCTACAATGTCTCCAGATCAACCACAGAGGATTTCCCGCTCAGGCTGCTGTCGGCTGCTCCCTCCCAGACATCTGTGTACTTCTGTGCCAGCAGTTACGGGGGCTCCTACGAGCAGTACTTCGGGCCGGGCACCAGGCTCACGGTCACAG	NAGVTQTPKFQVLKTGQSMTLQCAQDMNHEYMSWYRQDPGMGLRLIHYSVGAGITDQGEVPNGYNVSRSTTEDFPLRLLSAAPSQTSVYFCASSYGGSYEQYFGPGTRLTVT	TRB	F	T	F	T	F	T	TRBV6-5*01	TRBD1*01	TRBJ2-7*01	AATGCTGGTGTCACTCAGACCCCAAAATTCCAGGTCCTGAAGACAGGACAGAGCATGACACTGCAGTGTGCCCAGGATATGAACCATGAATACATGTCCTGGTATCGACAAGACCCAGGCATGGGGCTGAGGCTGATTCATTACTCAGTTGGTGCTGGTATCACTGACCAAGGAGAAGTCCCCAATGGCTACAATGTCTCCAGATCAACCACAGAGGATTTCCCGCTCAGGCTGCTGTCGGCTGCTCCCTCCCAGACATCTGTGTACTTCTGTGCCAGCAGTTACGGGGGCTCCTACGAGCAGTACTTCGGGCCGGGCACCAGGCTCACGGTCACAG	AATGCTGGTGTCACTCAGACCCCAAAATTCCAGGTCCTGAAGACAGGACAGAGCATGACACTGCAGTGTGCCCAGGATATGAACCATGAATACATGTCCTGGTATCGACAAGACCCAGGCATGGGGCTGAGGCTGATTCATTACTCAGTTGGTGCTGGTATCACTGACCAAGGAGAAGTCCCCAATGGCTACAATGTCTCCAGATCAACCACAGAGGATTTCCCGCTCAGGCTGCTGTCGGCTGCTCCCTCCCAGACATCTGTGTACTTCTGTGCCAGCAGTTACGGGGGCTCCTACGAGCAGTACTTCGGGCCGGGCACCAGGCTCACGGTCACAG	NAGVTQTPKFQVLKTGQSMTLQCAQDMNHEYMSWYRQDPGMGLRLIHYSVGAGITDQGEVPNGYNVSRSTTEDFPLRLLSAAPSQTSVYFCASSYGGSYEQYFGPGTRLTVT	NAGVTQTPKFQVLKTGQSMTLQCAQDMNHEYMSWYRQDPGMGLRLIHYSVGAGITDQGEVPNGYNVSRSTTEDFPLRLLSAAPSQTSVYFCASSYGGSYEQYFGPGTRLTVT	1	285	286	290	291	337	AATGCTGGTGTCACTCAGACCCCAAAATTCCAGGTCCTGAAGACAGGACAGAGCATGACACTGCAGTGTGCCCAGGATATGAACCATGAATACATGTCCTGGTATCGACAAGACCCAGGCATGGGGCTGAGGCTGATTCATTACTCAGTTGGTGCTGGTATCACTGACCAAGGAGAAGTCCCCAATGGCTACAATGTCTCCAGATCAACCACAGAGGATTTCCCGCTCAGGCTGCTGTCGGCTGCTCCCTCCCAGACATCTGTGTACTTCTGTGCCAGCAGTTAC	NAGVTQTPKFQVLKTGQSMTLQCAQDMNHEYMSWYRQDPGMGLRLIHYSVGAGITDQGEVPNGYNVSRSTTEDFPLRLLSAAPSQTSVYFCASSY	AATGCTGGTGTCACTCAGACCCCAAAATTCCAGGTCCTGAAGACAGGACAGAGCATGACACTGCAGTGTGCCCAGGATATGAACCATGAATACATGTCCTGGTATCGACAAGACCCAGGCATGGGGCTGAGGCTGATTCATTACTCAGTTGGTGCTGGTATCACTGACCAAGGAGAAGTCCCCAATGGCTACAATGTCTCCAGATCAACCACAGAGGATTTCCCGCTCAGGCTGCTGTCGGCTGCTCCCTCCCAGACATCTGTGTACTTCTGTGCCAGCAGTTAC	NAGVTQTPKFQVLKTGQSMTLQCAQDMNHEYMSWYRQDPGMGLRLIHYSVGAGITDQGEVPNGYNVSRSTTEDFPLRLLSAAPSQTSVYFCASSY	GGGGG	GG	GGGGG	GG	CTCCTACGAGCAGTACTTCGGGCCGGGCACCAGGCTCACGGTCACAG	SYEQYFGPGTRLTVT	CTCCTACGAGCAGTACTTCGGGCCGGGCACCAGGCTCACGGTCACAG	SYEQYFGPGTRLTVT	AATGCTGGTGTCACTCAGACCCCAAAATTCCAGGTCCTGAAGACAGGACAGAGCATGACACTGCAGTGTGCCCAGGAT	NAGVTQTPKFQVLKTGQSMTLQCAQD	ATGAACCATGAATAC	MNHEY	ATGTCCTGGTATCGACAAGACCCAGGCATGGGGCTGAGGCTGATTCATTAC	MSWYRQDPGMGLRLIHY	TCAGTTGGTGCTGGTATC	SVGAGI
Pat_208	KW11	GGCAATTCACGGCTAC	TCRbeta	tig00000008_GGCAATTCACGGCTAC	1168	14	1	AATGCTGGTGTCACTCAGACCCCAAAATTCCAGGTCCTGAAGACAGGACAGAGCATGACACTGCAGTGTGCCCAGGATATGAACCATAACTCCATGTACTGGTATCGACAAGACCCAGGCATGGGACTGAGGCTGATTTATTACTCAGCTTCTGAGGGTACCACTGACAAAGGAGAAGTCCCCAATGGCTACAATGTCTCCAGATTAAACAAACGGGAGTTCTCGCTCAGGCTGGAGTCGGCTGCTCCCTCCCAGACATCTGTGTACTTCTGTGCCAGCAGTGAAGGGGGAGGGACCTGGGAGCAGTACTTCGGGCCGGGCACCAGGCTCACGGTCACAG	NAGVTQTPKFQVLKTGQSMTLQCAQDMNHNSMYWYRQDPGMGLRLIYYSASEGTTDKGEVPNGYNVSRLNKREFSLRLESAAPSQTSVYFCASSEGGGTWEQYFGPGTRLTVT	TRB	F	T	F	T	F	T	TRBV6-1*01	TRBD2*02	TRBJ2-7*01	AATGCTGGTGTCACTCAGACCCCAAAATTCCAGGTCCTGAAGACAGGACAGAGCATGACACTGCAGTGTGCCCAGGATATGAACCATAACTCCATGTACTGGTATCGACAAGACCCAGGCATGGGACTGAGGCTGATTTATTACTCAGCTTCTGAGGGTACCACTGACAAAGGAGAAGTCCCCAATGGCTACAATGTCTCCAGATTAAACAAACGGGAGTTCTCGCTCAGGCTGGAGTCGGCTGCTCCCTCCCAGACATCTGTGTACTTCTGTGCCAGCAGTGAAGGGGGAGGGACCTGGGAGCAGTACTTCGGGCCGGGCACCAGGCTCACGGTCACAG	AATGCTGGTGTCACTCAGACCCCAAAATTCCAGGTCCTGAAGACAGGACAGAGCATGACACTGCAGTGTGCCCAGGATATGAACCATAACTCCATGTACTGGTATCGACAAGACCCAGGCATGGGACTGAGGCTGATTTATTACTCAGCTTCTGAGGGTACCACTGACAAAGGAGAAGTCCCCAATGGCTACAATGTCTCCAGATTAAACAAACGGGAGTTCTCGCTCAGGCTGGAGTCGGCTGCTCCCTCCCAGACATCTGTGTACTTCTGTGCCAGCAGTGAAGNGGGAGGGNNNNNNGAGCAGTACTTCGGGCCGGGCACCAGGCTCACGGTCACAG	NAGVTQTPKFQVLKTGQSMTLQCAQDMNHNSMYWYRQDPGMGLRLIYYSASEGTTDKGEVPNGYNVSRLNKREFSLRLESAAPSQTSVYFCASSEGGGTWEQYFGPGTRLTVT	NAGVTQTPKFQVLKTGQSMTLQCAQDMNHNSMYWYRQDPGMGLRLIYYSASEGTTDKGEVPNGYNVSRLNKREFSLRLESAAPSQTSVYFCASSEXGGXXEQYFGPGTRLTVT	1	286	288	294	301	340	AATGCTGGTGTCACTCAGACCCCAAAATTCCAGGTCCTGAAGACAGGACAGAGCATGACACTGCAGTGTGCCCAGGATATGAACCATAACTCCATGTACTGGTATCGACAAGACCCAGGCATGGGACTGAGGCTGATTTATTACTCAGCTTCTGAGGGTACCACTGACAAAGGAGAAGTCCCCAATGGCTACAATGTCTCCAGATTAAACAAACGGGAGTTCTCGCTCAGGCTGGAGTCGGCTGCTCCCTCCCAGACATCTGTGTACTTCTGTGCCAGCAGTGAAG	NAGVTQTPKFQVLKTGQSMTLQCAQDMNHNSMYWYRQDPGMGLRLIYYSASEGTTDKGEVPNGYNVSRLNKREFSLRLESAAPSQTSVYFCASSE	AATGCTGGTGTCACTCAGACCCCAAAATTCCAGGTCCTGAAGACAGGACAGAGCATGACACTGCAGTGTGCCCAGGATATGAACCATAACTCCATGTACTGGTATCGACAAGACCCAGGCATGGGACTGAGGCTGATTTATTACTCAGCTTCTGAGGGTACCACTGACAAAGGAGAAGTCCCCAATGGCTACAATGTCTCCAGATTAAACAAACGGGAGTTCTCGCTCAGGCTGGAGTCGGCTGCTCCCTCCCAGACATCTGTGTACTTCTGTGCCAGCAGTGAAG	NAGVTQTPKFQVLKTGQSMTLQCAQDMNHNSMYWYRQDPGMGLRLIYYSASEGTTDKGEVPNGYNVSRLNKREFSLRLESAAPSQTSVYFCASSE	GGGAGGG	GG	GGGAGGG	GG	GAGCAGTACTTCGGGCCGGGCACCAGGCTCACGGTCACAG	EQYFGPGTRLTVT	GAGCAGTACTTCGGGCCGGGCACCAGGCTCACGGTCACAG	EQYFGPGTRLTVT	AATGCTGGTGTCACTCAGACCCCAAAATTCCAGGTCCTGAAGACAGGACAGAGCATGACACTGCAGTGTGCCCAGGAT	NAGVTQTPKFQVLKTGQSMTLQCAQD	ATGAACCATAACTCC	MNHNS	ATGTACTGGTATCGACAAGACCCAGGCATGGGACTGAGGCTGATTTATTAC	MYWYRQDPGMGLRLIYY	TCAGCTTCTGAGGGTACC	SASEGT
Pat_208	KW11	GGGAATGCACACGCTG	TCRbeta	tig00000244_GGGAATGCACACGCTG	862	258	1	GAAACGGGAGTTACGCAGACACCAAGACACCTGGTCATGGGAATGACAAATAAGAAGTCTTTGAAATGTGAACAACATCTGGGGCATAACGCTATGTATTGGTACAAGCAAAGTGCTAAGAAGCCACTGGAGCTCATGTTTGTCTACAACTTTAAAGAACAGACTGAAAACAACAGTGTGCCAAGTCGCTTCTCACCTGAATGCCCCAACAGCTCTCACTTATTCCTTCACCTACACACCCTGCAGCCAGAAGACTCGGCCCTGTATCTCTGTGCCAGCAGCTCAACACAGCGGGGGGTTAGCACAGATACGCAGTATTTTGGCCCAGGCACCCGGCTGACAGTGCTCG	ETGVTQTPRHLVMGMTNKKSLKCEQHLGHNAMYWYKQSAKKPLELMFVYNFKEQTENNSVPSRFSPECPNSSHLFLHLHTLQPEDSALYLCASSSTQRGVSTDTQYFGPGTRLTVL	TRB	F	T	F	T	F	T	TRBV4-2*01	TRBD2*01	TRBJ2-3*01	GAAACGGGAGTTACGCAGACACCAAGACACCTGGTCATGGGAATGACAAATAAGAAGTCTTTGAAATGTGAACAACATCTGGGGCATAACGCTATGTATTGGTACAAGCAAAGTGCTAAGAAGCCACTGGAGCTCATGTTTGTCTACAACTTTAAAGAACAGACTGAAAACAACAGTGTGCCAAGTCGCTTCTCACCTGAATGCCCCAACAGCTCTCACTTATTCCTTCACCTACACACCCTGCAGCCAGAAGACTCGGCCCTGTATCTCTGTGCCAGCAGCTCAACACAGCGGGGGGTTAGCACAGATACGCAGTATTTTGGCCCAGGCACCCGGCTGACAGTGCTCG	GAAACGGGAGTTACGCAGACACCAAGACACCTGGTCATGGGAATGACAAATAAGAAGTCTTTGAAATGTGAACAACATCTGGGGCATAACGCTATGTATTGGTACAAGCAAAGTGCTAAGAAGCCACTGGAGCTCATGTTTGTCTACAACTTTAAAGAACAGACTGAAAACAACAGTGTGCCAAGTCGCTTCTCACCTGAATGCCCCAACAGCTCTCACTTATTCCTTCACCTACACACCCTGCAGCCAGAAGACTCGGCCCTGTATCTCTGTGCCAGCAGCNNNNNNNAGCGGGGGGNNAGCACAGATACGCAGTATTTTGGCCCAGGCACCCGGCTGACAGTGCTCG	ETGVTQTPRHLVMGMTNKKSLKCEQHLGHNAMYWYKQSAKKPLELMFVYNFKEQTENNSVPSRFSPECPNSSHLFLHLHTLQPEDSALYLCASSSTQRGVSTDTQYFGPGTRLTVL	ETGVTQTPRHLVMGMTNKKSLKCEQHLGHNAMYWYKQSAKKPLELMFVYNFKEQTENNSVPSRFSPECPNSSHLFLHLHTLQPEDSALYLCASSXXXRGXSTDTQYFGPGTRLTVL	1	282	290	298	301	349	GAAACGGGAGTTACGCAGACACCAAGACACCTGGTCATGGGAATGACAAATAAGAAGTCTTTGAAATGTGAACAACATCTGGGGCATAACGCTATGTATTGGTACAAGCAAAGTGCTAAGAAGCCACTGGAGCTCATGTTTGTCTACAACTTTAAAGAACAGACTGAAAACAACAGTGTGCCAAGTCGCTTCTCACCTGAATGCCCCAACAGCTCTCACTTATTCCTTCACCTACACACCCTGCAGCCAGAAGACTCGGCCCTGTATCTCTGTGCCAGCAGC	ETGVTQTPRHLVMGMTNKKSLKCEQHLGHNAMYWYKQSAKKPLELMFVYNFKEQTENNSVPSRFSPECPNSSHLFLHLHTLQPEDSALYLCASS	GAAACGGGAGTTACGCAGACACCAAGACACCTGGTCATGGGAATGACAAATAAGAAGTCTTTGAAATGTGAACAACATCTGGGGCATAACGCTATGTATTGGTACAAGCAAAGTGCTAAGAAGCCACTGGAGCTCATGTTTGTCTACAACTTTAAAGAACAGACTGAAAACAACAGTGTGCCAAGTCGCTTCTCACCTGAATGCCCCAACAGCTCTCACTTATTCCTTCACCTACACACCCTGCAGCCAGAAGACTCGGCCCTGTATCTCTGTGCCAGCAGC	ETGVTQTPRHLVMGMTNKKSLKCEQHLGHNAMYWYKQSAKKPLELMFVYNFKEQTENNSVPSRFSPECPNSSHLFLHLHTLQPEDSALYLCASS	AGCGGGGGG	RG	AGCGGGGGG	RG	AGCACAGATACGCAGTATTTTGGCCCAGGCACCCGGCTGACAGTGCTCG	STDTQYFGPGTRLTVL	AGCACAGATACGCAGTATTTTGGCCCAGGCACCCGGCTGACAGTGCTCG	STDTQYFGPGTRLTVL	GAAACGGGAGTTACGCAGACACCAAGACACCTGGTCATGGGAATGACAAATAAGAAGTCTTTGAAATGTGAACAACAT	ETGVTQTPRHLVMGMTNKKSLKCEQH	CTGGGGCATAACGCT	LGHNA	ATGTATTGGTACAAGCAAAGTGCTAAGAAGCCACTGGAGCTCATGTTTGTC	MYWYKQSAKKPLELMFV	TACAACTTTAAAGAACAG	YNFKEQ
Pat_208	TW10	GTAACTGCATTATCTC	TCRbeta	tig00000001_GTAACTGCATTATCTC	1801	142	1	GAACCTGAAGTCACCCAGACTCCCAGCCATCAGGTCACACAGATGGGACAGGAAGTGATCTTGCGCTGTGTCCCCATCTCTAATCACTTATACTTCTATTGGTACAGACAAATCTTGGGGCAGAAAGTCGAGTTTCTGGTTTCCTTTTATAATAATGAAATCTCAGAGAAGTCTGAAATATTCGATGATCAATTCTCAGTTGAAAGGCCTGATGGATCAAATTTCACTCTGAAGATCCGGTCCACAAAGCTGGAGGACTCAGCCATGTACTTCTGTGCCAGCAGTTTATTTACAGGGGATGAGCAGTTCTTCGGGCCAGGGACACGGCTCACCGTGCTAG	EPEVTQTPSHQVTQMGQEVILRCVPISNHLYFYWYRQILGQKVEFLVSFYNNEISEKSEIFDDQFSVERPDGSNFTLKIRSTKLEDSAMYFCASSLFTGDEQFFGPGTRLTVL	TRB	F	T	F	T	F	T	TRBV2*01	TRBD1*01	TRBJ2-1*01	GAACCTGAAGTCACCCAGACTCCCAGCCATCAGGTCACACAGATGGGACAGGAAGTGATCTTGCGCTGTGTCCCCATCTCTAATCACTTATACTTCTATTGGTACAGACAAATCTTGGGGCAGAAAGTCGAGTTTCTGGTTTCCTTTTATAATAATGAAATCTCAGAGAAGTCTGAAATATTCGATGATCAATTCTCAGTTGAAAGGCCTGATGGATCAAATTTCACTCTGAAGATCCGGTCCACAAAGCTGGAGGACTCAGCCATGTACTTCTGTGCCAGCAGTTTATTTACAGGGGATGAGCAGTTCTTCGGGCCAGGGACACGGCTCACCGTGCTAG	GAACCTGAAGTCACCCAGACTCCCAGCCATCAGGTCACACAGATGGGACAGGAAGTGATCTTGCGCTGTGTCCCCATCTCTAATCACTTATACTTCTATTGGTACAGACAAATCTTGGGGCAGAAAGTCGAGTTTCTGGTTTCCTTTTATAATAATGAAATCTCAGAGAAGTCTGAAATATTCGATGATCAATTCTCAGTTGAAAGGCCTGATGGATCAAATTTCACTCTGAAGATCCGGTCCACAAAGCTGGAGGACTCAGCCATGTACTTCTGTGCCAGCAGTNNNNNNACAGGGGATGAGCAGTTCTTCGGGCCAGGGACACGGCTCACCGTGCTAG	EPEVTQTPSHQVTQMGQEVILRCVPISNHLYFYWYRQILGQKVEFLVSFYNNEISEKSEIFDDQFSVERPDGSNFTLKIRSTKLEDSAMYFCASSLFTGDEQFFGPGTRLTVL	EPEVTQTPSHQVTQMGQEVILRCVPISNHLYFYWYRQILGQKVEFLVSFYNNEISEKSEIFDDQFSVERPDGSNFTLKIRSTKLEDSAMYFCASSXXTGDEQFFGPGTRLTVL	1	285	292	298	299	340	GAACCTGAAGTCACCCAGACTCCCAGCCATCAGGTCACACAGATGGGACAGGAAGTGATCTTGCGCTGTGTCCCCATCTCTAATCACTTATACTTCTATTGGTACAGACAAATCTTGGGGCAGAAAGTCGAGTTTCTGGTTTCCTTTTATAATAATGAAATCTCAGAGAAGTCTGAAATATTCGATGATCAATTCTCAGTTGAAAGGCCTGATGGATCAAATTTCACTCTGAAGATCCGGTCCACAAAGCTGGAGGACTCAGCCATGTACTTCTGTGCCAGCAGT	EPEVTQTPSHQVTQMGQEVILRCVPISNHLYFYWYRQILGQKVEFLVSFYNNEISEKSEIFDDQFSVERPDGSNFTLKIRSTKLEDSAMYFCASS	GAACCTGAAGTCACCCAGACTCCCAGCCATCAGGTCACACAGATGGGACAGGAAGTGATCTTGCGCTGTGTCCCCATCTCTAATCACTTATACTTCTATTGGTACAGACAAATCTTGGGGCAGAAAGTCGAGTTTCTGGTTTCCTTTTATAATAATGAAATCTCAGAGAAGTCTGAAATATTCGATGATCAATTCTCAGTTGAAAGGCCTGATGGATCAAATTTCACTCTGAAGATCCGGTCCACAAAGCTGGAGGACTCAGCCATGTACTTCTGTGCCAGCAGT	EPEVTQTPSHQVTQMGQEVILRCVPISNHLYFYWYRQILGQKVEFLVSFYNNEISEKSEIFDDQFSVERPDGSNFTLKIRSTKLEDSAMYFCASS	ACAGGGG	TG	ACAGGGG	TG	ATGAGCAGTTCTTCGGGCCAGGGACACGGCTCACCGTGCTAG	EQFFGPGTRLTVL	ATGAGCAGTTCTTCGGGCCAGGGACACGGCTCACCGTGCTAG	EQFFGPGTRLTVL	GAACCTGAAGTCACCCAGACTCCCAGCCATCAGGTCACACAGATGGGACAGGAAGTGATCTTGCGCTGTGTCCCCATC	EPEVTQTPSHQVTQMGQEVILRCVPI	TCTAATCACTTATAC	SNHLY	TTCTATTGGTACAGACAAATCTTGGGGCAGAAAGTCGAGTTTCTGGTTTCC	FYWYRQILGQKVEFLVS	TTTTATAATAATGAAATC	FYNNEI
Pat_208	TW10	GTCGTAAAGGATGCGT	TCRbeta	tig00000016_GTCGTAAAGGATGCGT	620	463	1	GGTGCTGGAGTCTCCCAGACCCCCAGTAACAAGGTCACAGAGAAGGGAAAATATGTAGAGCTCAGGTGTGATCCAATTTCAGGTCATACTGCCCTTTACTGGTACCGACAAAGCCTGGGGCAGGGCCCAGAGTTTCTAATTTACTTCCAAGGCACGGGTGCGGCAGATGACTCAGGGCTGCCCAACGATCGGTTCTTTGCAGTCAGGCCTGAGGGATCCGTCTCTACTCTGAAGATCCAGCGCACAGAGCGGGGGGACTCAGCCGTGTATCTCTGTGCCAGCAGCCAGGGAGGGGACTATGGCTACACCTTCGGTTCGGGGACCAGGTTAACCGTTGTAG	GAGVSQTPSNKVTEKGKYVELRCDPISGHTALYWYRQSLGQGPEFLIYFQGTGAADDSGLPNDRFFAVRPEGSVSTLKIQRTERGDSAVYLCASSQGGDYGYTFGSGTRLTVV	TRB	F	T	F	T	F	T	TRBV7-3*01	TRBD2*02	TRBJ1-2*01	GGTGCTGGAGTCTCCCAGACCCCCAGTAACAAGGTCACAGAGAAGGGAAAATATGTAGAGCTCAGGTGTGATCCAATTTCAGGTCATACTGCCCTTTACTGGTACCGACAAAGCCTGGGGCAGGGCCCAGAGTTTCTAATTTACTTCCAAGGCACGGGTGCGGCAGATGACTCAGGGCTGCCCAACGATCGGTTCTTTGCAGTCAGGCCTGAGGGATCCGTCTCTACTCTGAAGATCCAGCGCACAGAGCGGGGGGACTCAGCCGTGTATCTCTGTGCCAGCAGCCAGGGAGGGGACTATGGCTACACCTTCGGTTCGGGGACCAGGTTAACCGTTGTAG	GGTGCTGGAGTCTCCCAGACCCCCAGTAACAAGGTCACAGAGAAGGGAAAATATGTAGAGCTCAGGTGTGATCCAATTTCAGGTCATACTGCCCTTTACTGGTACCGACAAAGCCTGGGGCAGGGCCCAGAGTTTCTAATTTACTTCCAAGGCACGGGTGCGGCAGATGACTCAGGGCTGCCCAACGATCGGTTCTTTGCAGTCAGGCCTGAGGGATCCGTCTCTACTCTGAAGATCCAGCGCACAGAGCGGGGGGACTCAGCCGTGTATCTCTGTGCCAGCAGCNNGGGAGGGNACTATGGCTACACCTTCGGTTCGGGGACCAGGTTAACCGTTGTAG	GAGVSQTPSNKVTEKGKYVELRCDPISGHTALYWYRQSLGQGPEFLIYFQGTGAADDSGLPNDRFFAVRPEGSVSTLKIQRTERGDSAVYLCASSQGGDYGYTFGSGTRLTVV	GAGVSQTPSNKVTEKGKYVELRCDPISGHTALYWYRQSLGQGPEFLIYFQGTGAADDSGLPNDRFFAVRPEGSVSTLKIQRTERGDSAVYLCASSXGGXYGYTFGSGTRLTVV	1	285	288	294	296	340	GGTGCTGGAGTCTCCCAGACCCCCAGTAACAAGGTCACAGAGAAGGGAAAATATGTAGAGCTCAGGTGTGATCCAATTTCAGGTCATACTGCCCTTTACTGGTACCGACAAAGCCTGGGGCAGGGCCCAGAGTTTCTAATTTACTTCCAAGGCACGGGTGCGGCAGATGACTCAGGGCTGCCCAACGATCGGTTCTTTGCAGTCAGGCCTGAGGGATCCGTCTCTACTCTGAAGATCCAGCGCACAGAGCGGGGGGACTCAGCCGTGTATCTCTGTGCCAGCAGC	GAGVSQTPSNKVTEKGKYVELRCDPISGHTALYWYRQSLGQGPEFLIYFQGTGAADDSGLPNDRFFAVRPEGSVSTLKIQRTERGDSAVYLCASS	GGTGCTGGAGTCTCCCAGACCCCCAGTAACAAGGTCACAGAGAAGGGAAAATATGTAGAGCTCAGGTGTGATCCAATTTCAGGTCATACTGCCCTTTACTGGTACCGACAAAGCCTGGGGCAGGGCCCAGAGTTTCTAATTTACTTCCAAGGCACGGGTGCGGCAGATGACTCAGGGCTGCCCAACGATCGGTTCTTTGCAGTCAGGCCTGAGGGATCCGTCTCTACTCTGAAGATCCAGCGCACAGAGCGGGGGGACTCAGCCGTGTATCTCTGTGCCAGCAGC	GAGVSQTPSNKVTEKGKYVELRCDPISGHTALYWYRQSLGQGPEFLIYFQGTGAADDSGLPNDRFFAVRPEGSVSTLKIQRTERGDSAVYLCASS	GGGAGGG	GG	GGGAGGG	GG	ACTATGGCTACACCTTCGGTTCGGGGACCAGGTTAACCGTTGTAG	YGYTFGSGTRLTVV	ACTATGGCTACACCTTCGGTTCGGGGACCAGGTTAACCGTTGTAG	YGYTFGSGTRLTVV	GGTGCTGGAGTCTCCCAGACCCCCAGTAACAAGGTCACAGAGAAGGGAAAATATGTAGAGCTCAGGTGTGATCCAATT	GAGVSQTPSNKVTEKGKYVELRCDPI	TCAGGTCATACTGCC	SGHTA	CTTTACTGGTACCGACAAAGCCTGGGGCAGGGCCCAGAGTTTCTAATTTAC	LYWYRQSLGQGPEFLIY	TTCCAAGGCACGGGTGCG	FQGTGA
Pat_208	IW9	TGAGAGGTCCAGAAGG	TCRbeta	tig00000004_TGAGAGGTCCAGAAGG	1740	209	1	AATGCTGGTGTCACTCAGACCCCAAAATTCCAGGTCCTGAAGACAGGACAGAGCATGACACTGCAGTGTGCCCAGGATATGAACCATGAATACATGTCCTGGTATCGACAAGACCCAGGCATGGGGCTGAGGCTGATTCATTACTCAGTTGGTGCTGGTATCACTGACCAAGGAGAAGTCCCCAATGGCTACAATGTCTCCAGATCAACCACAGAGGATTTCCCGCTCAGGCTGCTGTCGGCTGCTCCCTCCCAGACATCTGTGTACTTCTGTGCCAGCAGTTACGGGGGCTCCTACGAGCAGTACTTCGGGCCGGGCACCAGGCTCACGGTCACAG	NAGVTQTPKFQVLKTGQSMTLQCAQDMNHEYMSWYRQDPGMGLRLIHYSVGAGITDQGEVPNGYNVSRSTTEDFPLRLLSAAPSQTSVYFCASSYGGSYEQYFGPGTRLTVT	TRB	F	T	F	T	F	T	TRBV6-5*01	TRBD1*01	TRBJ2-7*01	AATGCTGGTGTCACTCAGACCCCAAAATTCCAGGTCCTGAAGACAGGACAGAGCATGACACTGCAGTGTGCCCAGGATATGAACCATGAATACATGTCCTGGTATCGACAAGACCCAGGCATGGGGCTGAGGCTGATTCATTACTCAGTTGGTGCTGGTATCACTGACCAAGGAGAAGTCCCCAATGGCTACAATGTCTCCAGATCAACCACAGAGGATTTCCCGCTCAGGCTGCTGTCGGCTGCTCCCTCCCAGACATCTGTGTACTTCTGTGCCAGCAGTTACGGGGGCTCCTACGAGCAGTACTTCGGGCCGGGCACCAGGCTCACGGTCACAG	AATGCTGGTGTCACTCAGACCCCAAAATTCCAGGTCCTGAAGACAGGACAGAGCATGACACTGCAGTGTGCCCAGGATATGAACCATGAATACATGTCCTGGTATCGACAAGACCCAGGCATGGGGCTGAGGCTGATTCATTACTCAGTTGGTGCTGGTATCACTGACCAAGGAGAAGTCCCCAATGGCTACAATGTCTCCAGATCAACCACAGAGGATTTCCCGCTCAGGCTGCTGTCGGCTGCTCCCTCCCAGACATCTGTGTACTTCTGTGCCAGCAGTTACGGGGGCTCCTACGAGCAGTACTTCGGGCCGGGCACCAGGCTCACGGTCACAG	NAGVTQTPKFQVLKTGQSMTLQCAQDMNHEYMSWYRQDPGMGLRLIHYSVGAGITDQGEVPNGYNVSRSTTEDFPLRLLSAAPSQTSVYFCASSYGGSYEQYFGPGTRLTVT	NAGVTQTPKFQVLKTGQSMTLQCAQDMNHEYMSWYRQDPGMGLRLIHYSVGAGITDQGEVPNGYNVSRSTTEDFPLRLLSAAPSQTSVYFCASSYGGSYEQYFGPGTRLTVT	1	285	286	290	291	337	AATGCTGGTGTCACTCAGACCCCAAAATTCCAGGTCCTGAAGACAGGACAGAGCATGACACTGCAGTGTGCCCAGGATATGAACCATGAATACATGTCCTGGTATCGACAAGACCCAGGCATGGGGCTGAGGCTGATTCATTACTCAGTTGGTGCTGGTATCACTGACCAAGGAGAAGTCCCCAATGGCTACAATGTCTCCAGATCAACCACAGAGGATTTCCCGCTCAGGCTGCTGTCGGCTGCTCCCTCCCAGACATCTGTGTACTTCTGTGCCAGCAGTTAC	NAGVTQTPKFQVLKTGQSMTLQCAQDMNHEYMSWYRQDPGMGLRLIHYSVGAGITDQGEVPNGYNVSRSTTEDFPLRLLSAAPSQTSVYFCASSY	AATGCTGGTGTCACTCAGACCCCAAAATTCCAGGTCCTGAAGACAGGACAGAGCATGACACTGCAGTGTGCCCAGGATATGAACCATGAATACATGTCCTGGTATCGACAAGACCCAGGCATGGGGCTGAGGCTGATTCATTACTCAGTTGGTGCTGGTATCACTGACCAAGGAGAAGTCCCCAATGGCTACAATGTCTCCAGATCAACCACAGAGGATTTCCCGCTCAGGCTGCTGTCGGCTGCTCCCTCCCAGACATCTGTGTACTTCTGTGCCAGCAGTTAC	NAGVTQTPKFQVLKTGQSMTLQCAQDMNHEYMSWYRQDPGMGLRLIHYSVGAGITDQGEVPNGYNVSRSTTEDFPLRLLSAAPSQTSVYFCASSY	GGGGG	GG	GGGGG	GG	CTCCTACGAGCAGTACTTCGGGCCGGGCACCAGGCTCACGGTCACAG	SYEQYFGPGTRLTVT	CTCCTACGAGCAGTACTTCGGGCCGGGCACCAGGCTCACGGTCACAG	SYEQYFGPGTRLTVT	AATGCTGGTGTCACTCAGACCCCAAAATTCCAGGTCCTGAAGACAGGACAGAGCATGACACTGCAGTGTGCCCAGGAT	NAGVTQTPKFQVLKTGQSMTLQCAQD	ATGAACCATGAATAC	MNHEY	ATGTCCTGGTATCGACAAGACCCAGGCATGGGGCTGAGGCTGATTCATTAC	MSWYRQDPGMGLRLIHY	TCAGTTGGTGCTGGTATC	SVGAGI
Pat_208	KW11	TGAGGGAAGACCGGAT	TCRbeta	tig00000002_TGAGGGAAGACCGGAT	1281	501	1	GACACTGAAGTTACCCAGACACCAAAACACCTGGTCATGGGAATGACAAATAAGAAGTCTTTGAAATGTGAACAACATATGGGGCACAGGGCTATGTATTGGTACAAGCAGAAAGCTAAGAAGCCACCGGAGCTCATGTTTGTCTACAGCTATGAGAAACTCTCTATAAATGAAAGTGTGCCAAGTCGCTTCTCACCTGAATGCCCCAACAGCTCTCTCTTAAACCTTCACCTACACGCCCTGCAGCCAGAAGACTCAGCCCTGTATCTCTGCGCCAGCAGCCAAGATATGGCCGCGGTGGATACGCAGTATTTTGGCCCAGGCACCCGGCTGACAGTGCTCG	DTEVTQTPKHLVMGMTNKKSLKCEQHMGHRAMYWYKQKAKKPPELMFVYSYEKLSINESVPSRFSPECPNSSLLNLHLHALQPEDSALYLCASSQDMAAVDTQYFGPGTRLTVL	TRB	F	T	F	T	F	T	TRBV4-1*01		TRBJ2-3*01	GACACTGAAGTTACCCAGACACCAAAACACCTGGTCATGGGAATGACAAATAAGAAGTCTTTGAAATGTGAACAACATATGGGGCACAGGGCTATGTATTGGTACAAGCAGAAAGCTAAGAAGCCACCGGAGCTCATGTTTGTCTACAGCTATGAGAAACTCTCTATAAATGAAAGTGTGCCAAGTCGCTTCTCACCTGAATGCCCCAACAGCTCTCTCTTAAACCTTCACCTACACGCCCTGCAGCCAGAAGACTCAGCCCTGTATCTCTGCGCCAGCAGCCAAGATATGGCCGCGGTGGATACGCAGTATTTTGGCCCAGGCACCCGGCTGACAGTGCTCG	GACACTGAAGTTACCCAGACACCAAAACACCTGGTCATGGGAATGACAAATAAGAAGTCTTTGAAATGTGAACAACATATGGGGCACAGGGCTATGTATTGGTACAAGCAGAAAGCTAAGAAGCCACCGGAGCTCATGTTTGTCTACAGCTATGAGAAACTCTCTATAAATGAAAGTGTGCCAAGTCGCTTCTCACCTGAATGCCCCAACAGCTCTCTCTTAAACCTTCACCTACACGCCCTGCAGCCAGAAGACTCAGCCCTGTATCTCTGCGCCAGCAGCCAAGANNNNNNNNNNNNNGATACGCAGTATTTTGGCCCAGGCACCCGGCTGACAGTGCTCG	DTEVTQTPKHLVMGMTNKKSLKCEQHMGHRAMYWYKQKAKKPPELMFVYSYEKLSINESVPSRFSPECPNSSLLNLHLHALQPEDSALYLCASSQDMAAVDTQYFGPGTRLTVL	DTEVTQTPKHLVMGMTNKKSLKCEQHMGHRAMYWYKQKAKKPPELMFVYSYEKLSINESVPSRFSPECPNSSLLNLHLHALQPEDSALYLCASSQXXXXXDTQYFGPGTRLTVL	1	287			301	343	GACACTGAAGTTACCCAGACACCAAAACACCTGGTCATGGGAATGACAAATAAGAAGTCTTTGAAATGTGAACAACATATGGGGCACAGGGCTATGTATTGGTACAAGCAGAAAGCTAAGAAGCCACCGGAGCTCATGTTTGTCTACAGCTATGAGAAACTCTCTATAAATGAAAGTGTGCCAAGTCGCTTCTCACCTGAATGCCCCAACAGCTCTCTCTTAAACCTTCACCTACACGCCCTGCAGCCAGAAGACTCAGCCCTGTATCTCTGCGCCAGCAGCCAAGA	DTEVTQTPKHLVMGMTNKKSLKCEQHMGHRAMYWYKQKAKKPPELMFVYSYEKLSINESVPSRFSPECPNSSLLNLHLHALQPEDSALYLCASSQ	GACACTGAAGTTACCCAGACACCAAAACACCTGGTCATGGGAATGACAAATAAGAAGTCTTTGAAATGTGAACAACATATGGGGCACAGGGCTATGTATTGGTACAAGCAGAAAGCTAAGAAGCCACCGGAGCTCATGTTTGTCTACAGCTATGAGAAACTCTCTATAAATGAAAGTGTGCCAAGTCGCTTCTCACCTGAATGCCCCAACAGCTCTCTCTTAAACCTTCACCTACACGCCCTGCAGCCAGAAGACTCAGCCCTGTATCTCTGCGCCAGCAGCCAAGA	DTEVTQTPKHLVMGMTNKKSLKCEQHMGHRAMYWYKQKAKKPPELMFVYSYEKLSINESVPSRFSPECPNSSLLNLHLHALQPEDSALYLCASSQ					GATACGCAGTATTTTGGCCCAGGCACCCGGCTGACAGTGCTCG	DTQYFGPGTRLTVL	GATACGCAGTATTTTGGCCCAGGCACCCGGCTGACAGTGCTCG	DTQYFGPGTRLTVL	GACACTGAAGTTACCCAGACACCAAAACACCTGGTCATGGGAATGACAAATAAGAAGTCTTTGAAATGTGAACAACAT	DTEVTQTPKHLVMGMTNKKSLKCEQH	ATGGGGCACAGGGCT	MGHRA	ATGTATTGGTACAAGCAGAAAGCTAAGAAGCCACCGGAGCTCATGTTTGTC	MYWYKQKAKKPPELMFV	TACAGCTATGAGAAACTC	YSYEKL
Pat_208	KW11	TGCGCAGAGTGGACGT	TCRbeta	tig00000005_TGCGCAGAGTGGACGT	1055	475	1	AATGCTGGTGTCACTCAGACCCCAAAATTCCAGGTCCTGAAGACAGGACAGAGCATGACACTGCAGTGTGCCCAGGATATGAACCATAACTCCATGTACTGGTATCGACAAGACCCAGGCATGGGACTGAGGCTGATTTATTACTCAGCTTCTGAGGGTACCACTGACAAAGGAGAAGTCCCCAATGGCTACAATGTCTCCAGATTAAACAAACGGGAGTTCTCGCTCAGGCTGGAGTCGGCTGCTCCCTCCCAGACATCTGTGTATCTCTGTGCCAGCAGCTTAGAGGGGCAGGTCTCCTACAATGAGCAGTTCTTCGGGCCAGGGACACGGCTCACCGTGCTAG	NAGVTQTPKFQVLKTGQSMTLQCAQDMNHNSMYWYRQDPGMGLRLIYYSASEGTTDKGEVPNGYNVSRLNKREFSLRLESAAPSQTSVYLCASSLEGQVSYNEQFFGPGTRLTVL	TRB	F	T	F	T	F	T	TRBV6-1*01	TRBD1*01	TRBJ2-1*01	AATGCTGGTGTCACTCAGACCCCAAAATTCCAGGTCCTGAAGACAGGACAGAGCATGACACTGCAGTGTGCCCAGGATATGAACCATAACTCCATGTACTGGTATCGACAAGACCCAGGCATGGGACTGAGGCTGATTTATTACTCAGCTTCTGAGGGTACCACTGACAAAGGAGAAGTCCCCAATGGCTACAATGTCTCCAGATTAAACAAACGGGAGTTCTCGCTCAGGCTGGAGTCGGCTGCTCCCTCCCAGACATCTGTGTATCTCTGTGCCAGCAGCTTAGAGGGGCAGGTCTCCTACAATGAGCAGTTCTTCGGGCCAGGGACACGGCTCACCGTGCTAG	AATGCTGGTGTCACTCAGACCCCAAAATTCCAGGTCCTGAAGACAGGACAGAGCATGACACTGCAGTGTGCCCAGGATATGAACCATAACTCCATGTACTGGTATCGACAAGACCCAGGCATGGGACTGAGGCTGATTTATTACTCAGCTTCTGAGGGTACCACTGACAAAGGAGAAGTCCCCAATGGCTACAATGTCTCCAGATTAAACAAACGGGAGTTCTCGCTCAGGCTGGAGTCGGCTGCTCCCTCCCAGACATCTGTGTACTTCTGTGCCAGCAGNNNNNAGGGGNNNNNCTCCTACAATGAGCAGTTCTTCGGGCCAGGGACACGGCTCACCGTGCTAG	NAGVTQTPKFQVLKTGQSMTLQCAQDMNHNSMYWYRQDPGMGLRLIYYSASEGTTDKGEVPNGYNVSRLNKREFSLRLESAAPSQTSVYLCASSLEGQVSYNEQFFGPGTRLTVL	NAGVTQTPKFQVLKTGQSMTLQCAQDMNHNSMYWYRQDPGMGLRLIYYSASEGTTDKGEVPNGYNVSRLNKREFSLRLESAAPSQTSVYFCASXXXGXXSYNEQFFGPGTRLTVL	1	281	287	291	297	346	AATGCTGGTGTCACTCAGACCCCAAAATTCCAGGTCCTGAAGACAGGACAGAGCATGACACTGCAGTGTGCCCAGGATATGAACCATAACTCCATGTACTGGTATCGACAAGACCCAGGCATGGGACTGAGGCTGATTTATTACTCAGCTTCTGAGGGTACCACTGACAAAGGAGAAGTCCCCAATGGCTACAATGTCTCCAGATTAAACAAACGGGAGTTCTCGCTCAGGCTGGAGTCGGCTGCTCCCTCCCAGACATCTGTGTATCTCTGTGCCAGCAG	NAGVTQTPKFQVLKTGQSMTLQCAQDMNHNSMYWYRQDPGMGLRLIYYSASEGTTDKGEVPNGYNVSRLNKREFSLRLESAAPSQTSVYLCAS	AATGCTGGTGTCACTCAGACCCCAAAATTCCAGGTCCTGAAGACAGGACAGAGCATGACACTGCAGTGTGCCCAGGATATGAACCATAACTCCATGTACTGGTATCGACAAGACCCAGGCATGGGACTGAGGCTGATTTATTACTCAGCTTCTGAGGGTACCACTGACAAAGGAGAAGTCCCCAATGGCTACAATGTCTCCAGATTAAACAAACGGGAGTTCTCGCTCAGGCTGGAGTCGGCTGCTCCCTCCCAGACATCTGTGTACTTCTGTGCCAGCAG	NAGVTQTPKFQVLKTGQSMTLQCAQDMNHNSMYWYRQDPGMGLRLIYYSASEGTTDKGEVPNGYNVSRLNKREFSLRLESAAPSQTSVYFCAS	AGGGG	G	AGGGG	G	CTCCTACAATGAGCAGTTCTTCGGGCCAGGGACACGGCTCACCGTGCTAG	SYNEQFFGPGTRLTVL	CTCCTACAATGAGCAGTTCTTCGGGCCAGGGACACGGCTCACCGTGCTAG	SYNEQFFGPGTRLTVL	AATGCTGGTGTCACTCAGACCCCAAAATTCCAGGTCCTGAAGACAGGACAGAGCATGACACTGCAGTGTGCCCAGGAT	NAGVTQTPKFQVLKTGQSMTLQCAQD	ATGAACCATAACTCC	MNHNS	ATGTACTGGTATCGACAAGACCCAGGCATGGGACTGAGGCTGATTTATTAC	MYWYRQDPGMGLRLIYY	TCAGCTTCTGAGGGTACC	SASEGT
Pat_208	KW11	TGGCTGGGTTCTGGTA	TCRbeta	tig00000007_TGGCTGGGTTCTGGTA	593	499	1	GAAACGGGAGTTACGCAGACACCAAGACACCTGGTCATGGGAATGACAAATAAGAAGTCTTTGAAATGTGAACAACATCTGGGGCATAACGCTATGTATTGGTACAAGCAAAGTGCTAAGAAGCCACTGGAGCTCATGTTTGTCTACAACTTTAAAGAACAGACTGAAAACAACAGTGTGCCAAGTCGCTTCTCACCTGAATGCCCCAACAGCTCTCACTTATTCCTTCACCTACACACCCTGCAGCCAGAAGACTCGGCCCTGTATCTCTGTGCCAGCAGCCAAGTTCTCAGGGACACTGTCAATGGCTACACCTTCGGTTCGGGGACCAGGTTAACCGTTGTAG	ETGVTQTPRHLVMGMTNKKSLKCEQHLGHNAMYWYKQSAKKPLELMFVYNFKEQTENNSVPSRFSPECPNSSHLFLHLHTLQPEDSALYLCASSQVLRDTVNGYTFGSGTRLTVV	TRB	F	T	F	T	F	T	TRBV4-2*01	TRBD1*01	TRBJ1-2*01	GAAACGGGAGTTACGCAGACACCAAGACACCTGGTCATGGGAATGACAAATAAGAAGTCTTTGAAATGTGAACAACATCTGGGGCATAACGCTATGTATTGGTACAAGCAAAGTGCTAAGAAGCCACTGGAGCTCATGTTTGTCTACAACTTTAAAGAACAGACTGAAAACAACAGTGTGCCAAGTCGCTTCTCACCTGAATGCCCCAACAGCTCTCACTTATTCCTTCACCTACACACCCTGCAGCCAGAAGACTCGGCCCTGTATCTCTGTGCCAGCAGCCAAGTTCTCAGGGACACTGTCAATGGCTACACCTTCGGTTCGGGGACCAGGTTAACCGTTGTAG	GAAACGGGAGTTACGCAGACACCAAGACACCTGGTCATGGGAATGACAAATAAGAAGTCTTTGAAATGTGAACAACATCTGGGGCATAACGCTATGTATTGGTACAAGCAAAGTGCTAAGAAGCCACTGGAGCTCATGTTTGTCTACAACTTTAAAGAACAGACTGAAAACAACAGTGTGCCAAGTCGCTTCTCACCTGAATGCCCCAACAGCTCTCACTTATTCCTTCACCTACACACCCTGCAGCCAGAAGACTCGGCCCTGTATCTCTGTGCCAGCAGCCAAGNNNNNNGGGACANNNNNNATGGCTACACCTTCGGTTCGGGGACCAGGTTAACCGTTGTAG	ETGVTQTPRHLVMGMTNKKSLKCEQHLGHNAMYWYKQSAKKPLELMFVYNFKEQTENNSVPSRFSPECPNSSHLFLHLHTLQPEDSALYLCASSQVLRDTVNGYTFGSGTRLTVV	ETGVTQTPRHLVMGMTNKKSLKCEQHLGHNAMYWYKQSAKKPLELMFVYNFKEQTENNSVPSRFSPECPNSSHLFLHLHTLQPEDSALYLCASSQXXXDXXXGYTFGSGTRLTVV	1	286	293	298	305	346	GAAACGGGAGTTACGCAGACACCAAGACACCTGGTCATGGGAATGACAAATAAGAAGTCTTTGAAATGTGAACAACATCTGGGGCATAACGCTATGTATTGGTACAAGCAAAGTGCTAAGAAGCCACTGGAGCTCATGTTTGTCTACAACTTTAAAGAACAGACTGAAAACAACAGTGTGCCAAGTCGCTTCTCACCTGAATGCCCCAACAGCTCTCACTTATTCCTTCACCTACACACCCTGCAGCCAGAAGACTCGGCCCTGTATCTCTGTGCCAGCAGCCAAG	ETGVTQTPRHLVMGMTNKKSLKCEQHLGHNAMYWYKQSAKKPLELMFVYNFKEQTENNSVPSRFSPECPNSSHLFLHLHTLQPEDSALYLCASSQ	GAAACGGGAGTTACGCAGACACCAAGACACCTGGTCATGGGAATGACAAATAAGAAGTCTTTGAAATGTGAACAACATCTGGGGCATAACGCTATGTATTGGTACAAGCAAAGTGCTAAGAAGCCACTGGAGCTCATGTTTGTCTACAACTTTAAAGAACAGACTGAAAACAACAGTGTGCCAAGTCGCTTCTCACCTGAATGCCCCAACAGCTCTCACTTATTCCTTCACCTACACACCCTGCAGCCAGAAGACTCGGCCCTGTATCTCTGTGCCAGCAGCCAAG	ETGVTQTPRHLVMGMTNKKSLKCEQHLGHNAMYWYKQSAKKPLELMFVYNFKEQTENNSVPSRFSPECPNSSHLFLHLHTLQPEDSALYLCASSQ	GGGACA	D	GGGACA	D	ATGGCTACACCTTCGGTTCGGGGACCAGGTTAACCGTTGTAG	GYTFGSGTRLTVV	ATGGCTACACCTTCGGTTCGGGGACCAGGTTAACCGTTGTAG	GYTFGSGTRLTVV	GAAACGGGAGTTACGCAGACACCAAGACACCTGGTCATGGGAATGACAAATAAGAAGTCTTTGAAATGTGAACAACAT	ETGVTQTPRHLVMGMTNKKSLKCEQH	CTGGGGCATAACGCT	LGHNA	ATGTATTGGTACAAGCAAAGTGCTAAGAAGCCACTGGAGCTCATGTTTGTC	MYWYKQSAKKPLELMFV	TACAACTTTAAAGAACAG	YNFKEQ
Pat_208	KW11	TTATGCTTCGAGAGCA	TCRbeta	tig00000002_TTATGCTTCGAGAGCA	669	500	1	GATACTGGAGTCTCCCAGGACCCCAGACACAAGATCACAAAGAGGGGACAGAATGTAACTTTCAGGTGTGATCCAATTTCTGAACACAGCCGCCTTTATTGGTACCGACAGACCCTGGGGCAGGGCCCAGAGTTTCTGACTTACTTCCAGAATGAAGCTCAACTAGAAAAATCAAGGCTGCTCAGTGATCGGTTCTCTGCAGAGAGGCCTAAGGGATCTTTCTCCACCTTGGAGATCCAGCGCACAGAGCAGGGGGACTCGGCCATGTATCTCTGTGCCAGCAGCCCGAGCCTCGGAGGGGAGACCCAGTACTTCGGGCCAGGCACGCGGCTCCTGGTGCTCG	DTGVSQDPRHKITKRGQNVTFRCDPISEHSRLYWYRQTLGQGPEFLTYFQNEAQLEKSRLLSDRFSAERPKGSFSTLEIQRTEQGDSAMYLCASSPSLGGETQYFGPGTRLLVL	TRB	F	T	F	T	F	T	TRBV7-9*03	TRBD2*02	TRBJ2-5*01	GATACTGGAGTCTCCCAGGACCCCAGACACAAGATCACAAAGAGGGGACAGAATGTAACTTTCAGGTGTGATCCAATTTCTGAACACAGCCGCCTTTATTGGTACCGACAGACCCTGGGGCAGGGCCCAGAGTTTCTGACTTACTTCCAGAATGAAGCTCAACTAGAAAAATCAAGGCTGCTCAGTGATCGGTTCTCTGCAGAGAGGCCTAAGGGATCTTTCTCCACCTTGGAGATCCAGCGCACAGAGCAGGGGGACTCGGCCATGTATCTCTGTGCCAGCAGCCCGAGCCTCGGAGGGGAGACCCAGTACTTCGGGCCAGGCACGCGGCTCCTGGTGCTCG	GATACTGGAGTCTCCCAGGACCCCAGACACAAGATCACAAAGAGGGGACAGAATGTAACTTTCAGGTGTGATCCAATTTCTGAACACAACCGCCTTTATTGGTACCGACAGACCCTGGGGCAGGGCCCAGAGTTTCTGACTTACTTCCAGAATGAAGCTCAACTAGAAAAATCAAGGCTGCTCAGTGATCGGTTCTCTGCAGAGAGGCCTAAGGGATCTTTCTCCACCTTGGAGATCCAGCGCACAGAGCAGGGGGACTCGGCCATGTATCTCTGTGCCAGCAGCNNNNNNNNNGGAGGGGAGACCCAGTACTTCGGGCCAGGCACGCGGCTCCTGGTGCTCG	DTGVSQDPRHKITKRGQNVTFRCDPISEHSRLYWYRQTLGQGPEFLTYFQNEAQLEKSRLLSDRFSAERPKGSFSTLEIQRTEQGDSAMYLCASSPSLGGETQYFGPGTRLLVL	DTGVSQDPRHKITKRGQNVTFRCDPISEHNRLYWYRQTLGQGPEFLTYFQNEAQLEKSRLLSDRFSAERPKGSFSTLEIQRTEQGDSAMYLCASSXXXGGETQYFGPGTRLLVL	1	285	295	300	301	343	GATACTGGAGTCTCCCAGGACCCCAGACACAAGATCACAAAGAGGGGACAGAATGTAACTTTCAGGTGTGATCCAATTTCTGAACACAGCCGCCTTTATTGGTACCGACAGACCCTGGGGCAGGGCCCAGAGTTTCTGACTTACTTCCAGAATGAAGCTCAACTAGAAAAATCAAGGCTGCTCAGTGATCGGTTCTCTGCAGAGAGGCCTAAGGGATCTTTCTCCACCTTGGAGATCCAGCGCACAGAGCAGGGGGACTCGGCCATGTATCTCTGTGCCAGCAGC	DTGVSQDPRHKITKRGQNVTFRCDPISEHSRLYWYRQTLGQGPEFLTYFQNEAQLEKSRLLSDRFSAERPKGSFSTLEIQRTEQGDSAMYLCASS	GATACTGGAGTCTCCCAGGACCCCAGACACAAGATCACAAAGAGGGGACAGAATGTAACTTTCAGGTGTGATCCAATTTCTGAACACAACCGCCTTTATTGGTACCGACAGACCCTGGGGCAGGGCCCAGAGTTTCTGACTTACTTCCAGAATGAAGCTCAACTAGAAAAATCAAGGCTGCTCAGTGATCGGTTCTCTGCAGAGAGGCCTAAGGGATCTTTCTCCACCTTGGAGATCCAGCGCACAGAGCAGGGGGACTCGGCCATGTATCTCTGTGCCAGCAGC	DTGVSQDPRHKITKRGQNVTFRCDPISEHNRLYWYRQTLGQGPEFLTYFQNEAQLEKSRLLSDRFSAERPKGSFSTLEIQRTEQGDSAMYLCASS	GGAGGG	GG	GGAGGG	GG	GAGACCCAGTACTTCGGGCCAGGCACGCGGCTCCTGGTGCTCG	ETQYFGPGTRLLVL	GAGACCCAGTACTTCGGGCCAGGCACGCGGCTCCTGGTGCTCG	ETQYFGPGTRLLVL	GATACTGGAGTCTCCCAGGACCCCAGACACAAGATCACAAAGAGGGGACAGAATGTAACTTTCAGGTGTGATCCAATT	DTGVSQDPRHKITKRGQNVTFRCDPI	TCTGAACACAGCCGC	SEHSR	CTTTATTGGTACCGACAGACCCTGGGGCAGGGCCCAGAGTTTCTGACTTAC	LYWYRQTLGQGPEFLTY	TTCCAGAATGAAGCTCAA	FQNEAQ
Pat_208	IW9	TTTATGCTCCAGATCA	TCRbeta	tig00000011_TTTATGCTCCAGATCA	969	486	1	GATTCTGGAGTCACACAAACCCCAAAGCACCTGATCACAGCAACTGGACAGCGAGTGACGCTGAGATGCTCCCCTAGGTCTGGAGACCTCTCTGTGTACTGGTACCAACAGAGCCTGGACCAGGGCCTCCAGTTCCTCATTCAGTATTATAATGGAGAAGAGAGAGCAAAAGGAAACATTCTTGAACGATTCTCCGCACAACAGTTCCCTGACTTGCACTCTGAACTAAACCTGAGCTCTCTGGAGCTGGGGGACTCAGCTTTGTATTTCTGTGCCAGCACGCAGGGTTATGGCTACACCTTCGGTTCGGGGACCAGGTTAACCGTTGTAG	DSGVTQTPKHLITATGQRVTLRCSPRSGDLSVYWYQQSLDQGLQFLIQYYNGEERAKGNILERFSAQQFPDLHSELNLSSLELGDSALYFCASTQGYGYTFGSGTRLTVV	TRB	F	T	F	T	F	T	TRBV9*01	TRBD1*01	TRBJ1-2*01	GATTCTGGAGTCACACAAACCCCAAAGCACCTGATCACAGCAACTGGACAGCGAGTGACGCTGAGATGCTCCCCTAGGTCTGGAGACCTCTCTGTGTACTGGTACCAACAGAGCCTGGACCAGGGCCTCCAGTTCCTCATTCAGTATTATAATGGAGAAGAGAGAGCAAAAGGAAACATTCTTGAACGATTCTCCGCACAACAGTTCCCTGACTTGCACTCTGAACTAAACCTGAGCTCTCTGGAGCTGGGGGACTCAGCTTTGTATTTCTGTGCCAGCACGCAGGGTTATGGCTACACCTTCGGTTCGGGGACCAGGTTAACCGTTGTAG	GATTCTGGAGTCACACAAACCCCAAAGCACCTGATCACAGCAACTGGACAGCGAGTGACGCTGAGATGCTCCCCTAGGTCTGGAGACCTCTCTGTGTACTGGTACCAACAGAGCCTGGACCAGGGCCTCCAGTTCCTCATTCAGTATTATAATGGAGAAGAGAGAGCAAAAGGAAACATTCTTGAACGATTCTCCGCACAACAGTTCCCTGACTTGCACTCTGAACTAAACCTGAGCTCTCTGGAGCTGGGGGACTCAGCTTTGTATTTCTGTGCCAGCANNCAGGGNTATGGCTACACCTTCGGTTCGGGGACCAGGTTAACCGTTGTAG	DSGVTQTPKHLITATGQRVTLRCSPRSGDLSVYWYQQSLDQGLQFLIQYYNGEERAKGNILERFSAQQFPDLHSELNLSSLELGDSALYFCASTQGYGYTFGSGTRLTVV	DSGVTQTPKHLITATGQRVTLRCSPRSGDLSVYWYQQSLDQGLQFLIQYYNGEERAKGNILERFSAQQFPDLHSELNLSSLELGDSALYFCASXQGYGYTFGSGTRLTVV	1	280	283	287	289	331	GATTCTGGAGTCACACAAACCCCAAAGCACCTGATCACAGCAACTGGACAGCGAGTGACGCTGAGATGCTCCCCTAGGTCTGGAGACCTCTCTGTGTACTGGTACCAACAGAGCCTGGACCAGGGCCTCCAGTTCCTCATTCAGTATTATAATGGAGAAGAGAGAGCAAAAGGAAACATTCTTGAACGATTCTCCGCACAACAGTTCCCTGACTTGCACTCTGAACTAAACCTGAGCTCTCTGGAGCTGGGGGACTCAGCTTTGTATTTCTGTGCCAGCA	DSGVTQTPKHLITATGQRVTLRCSPRSGDLSVYWYQQSLDQGLQFLIQYYNGEERAKGNILERFSAQQFPDLHSELNLSSLELGDSALYFCAS	GATTCTGGAGTCACACAAACCCCAAAGCACCTGATCACAGCAACTGGACAGCGAGTGACGCTGAGATGCTCCCCTAGGTCTGGAGACCTCTCTGTGTACTGGTACCAACAGAGCCTGGACCAGGGCCTCCAGTTCCTCATTCAGTATTATAATGGAGAAGAGAGAGCAAAAGGAAACATTCTTGAACGATTCTCCGCACAACAGTTCCCTGACTTGCACTCTGAACTAAACCTGAGCTCTCTGGAGCTGGGGGACTCAGCTTTGTATTTCTGTGCCAGCA	DSGVTQTPKHLITATGQRVTLRCSPRSGDLSVYWYQQSLDQGLQFLIQYYNGEERAKGNILERFSAQQFPDLHSELNLSSLELGDSALYFCAS	CAGGG	QG	CAGGG	QG	TATGGCTACACCTTCGGTTCGGGGACCAGGTTAACCGTTGTAG	YGYTFGSGTRLTVV	TATGGCTACACCTTCGGTTCGGGGACCAGGTTAACCGTTGTAG	YGYTFGSGTRLTVV	GATTCTGGAGTCACACAAACCCCAAAGCACCTGATCACAGCAACTGGACAGCGAGTGACGCTGAGATGCTCCCCTAGG	DSGVTQTPKHLITATGQRVTLRCSPR	TCTGGAGACCTCTCT	SGDLS	GTGTACTGGTACCAACAGAGCCTGGACCAGGGCCTCCAGTTCCTCATTCAG	VYWYQQSLDQGLQFLIQ	TATTATAATGGAGAAGAG	YYNGEE
Pat_453	KW11	AAGGCAGAGACATAAC	TCRbeta	tig00000046_AAGGCAGAGACATAAC	676	470	1	AATGCTGGTGTCACTCAGACCCCAAAATTCCAGGTCCTGAAGACAGGACAGAGCATGACACTGCAGTGTGCCCAGGATATGAACCATGAATACATGTCCTGGTATCGACAAGACCCAGGCATGGGGCTGAGGCTGATTCATTACTCAGTTGGTGCTGGTATCACTGACCAAGGAGAAGTCCCCAATGGCTACAATGTCTCCAGATCAACCACAGAGGATTTCCCGCTCAGGCTGCTGTCGGCTGCTCCCTCCCAGACATCTGTGTACTTCTGTGCCAGCAGAGGGACTAGCGGGGAGGATACGCAGTATTTTGGCCCAGGCACCCGGCTGACAGTGCTCG	NAGVTQTPKFQVLKTGQSMTLQCAQDMNHEYMSWYRQDPGMGLRLIHYSVGAGITDQGEVPNGYNVSRSTTEDFPLRLLSAAPSQTSVYFCASRGTSGEDTQYFGPGTRLTVL	TRB	F	T	F	T	F	T	TRBV6-5*01	TRBD2*01	TRBJ2-3*01	AATGCTGGTGTCACTCAGACCCCAAAATTCCAGGTCCTGAAGACAGGACAGAGCATGACACTGCAGTGTGCCCAGGATATGAACCATGAATACATGTCCTGGTATCGACAAGACCCAGGCATGGGGCTGAGGCTGATTCATTACTCAGTTGGTGCTGGTATCACTGACCAAGGAGAAGTCCCCAATGGCTACAATGTCTCCAGATCAACCACAGAGGATTTCCCGCTCAGGCTGCTGTCGGCTGCTCCCTCCCAGACATCTGTGTACTTCTGTGCCAGCAGAGGGACTAGCGGGGAGGATACGCAGTATTTTGGCCCAGGCACCCGGCTGACAGTGCTCG	AATGCTGGTGTCACTCAGACCCCAAAATTCCAGGTCCTGAAGACAGGACAGAGCATGACACTGCAGTGTGCCCAGGATATGAACCATGAATACATGTCCTGGTATCGACAAGACCCAGGCATGGGGCTGAGGCTGATTCATTACTCAGTTGGTGCTGGTATCACTGACCAAGGAGAAGTCCCCAATGGCTACAATGTCTCCAGATCAACCACAGAGGATTTCCCGCTCAGGCTGCTGTCGGCTGCTCCCTCCCAGACATCTGTGTACTTCTGTGCCAGCAGNGGGACTAGCGGGGNNGATACGCAGTATTTTGGCCCAGGCACCCGGCTGACAGTGCTCG	NAGVTQTPKFQVLKTGQSMTLQCAQDMNHEYMSWYRQDPGMGLRLIHYSVGAGITDQGEVPNGYNVSRSTTEDFPLRLLSAAPSQTSVYFCASRGTSGEDTQYFGPGTRLTVL	NAGVTQTPKFQVLKTGQSMTLQCAQDMNHEYMSWYRQDPGMGLRLIHYSVGAGITDQGEVPNGYNVSRSTTEDFPLRLLSAAPSQTSVYFCASXGTSGXDTQYFGPGTRLTVL	1	281	283	295	298	340	AATGCTGGTGTCACTCAGACCCCAAAATTCCAGGTCCTGAAGACAGGACAGAGCATGACACTGCAGTGTGCCCAGGATATGAACCATGAATACATGTCCTGGTATCGACAAGACCCAGGCATGGGGCTGAGGCTGATTCATTACTCAGTTGGTGCTGGTATCACTGACCAAGGAGAAGTCCCCAATGGCTACAATGTCTCCAGATCAACCACAGAGGATTTCCCGCTCAGGCTGCTGTCGGCTGCTCCCTCCCAGACATCTGTGTACTTCTGTGCCAGCAG	NAGVTQTPKFQVLKTGQSMTLQCAQDMNHEYMSWYRQDPGMGLRLIHYSVGAGITDQGEVPNGYNVSRSTTEDFPLRLLSAAPSQTSVYFCAS	AATGCTGGTGTCACTCAGACCCCAAAATTCCAGGTCCTGAAGACAGGACAGAGCATGACACTGCAGTGTGCCCAGGATATGAACCATGAATACATGTCCTGGTATCGACAAGACCCAGGCATGGGGCTGAGGCTGATTCATTACTCAGTTGGTGCTGGTATCACTGACCAAGGAGAAGTCCCCAATGGCTACAATGTCTCCAGATCAACCACAGAGGATTTCCCGCTCAGGCTGCTGTCGGCTGCTCCCTCCCAGACATCTGTGTACTTCTGTGCCAGCAG	NAGVTQTPKFQVLKTGQSMTLQCAQDMNHEYMSWYRQDPGMGLRLIHYSVGAGITDQGEVPNGYNVSRSTTEDFPLRLLSAAPSQTSVYFCAS	GGGACTAGCGGGG	GTSG	GGGACTAGCGGGG	GTSG	GATACGCAGTATTTTGGCCCAGGCACCCGGCTGACAGTGCTCG	DTQYFGPGTRLTVL	GATACGCAGTATTTTGGCCCAGGCACCCGGCTGACAGTGCTCG	DTQYFGPGTRLTVL	AATGCTGGTGTCACTCAGACCCCAAAATTCCAGGTCCTGAAGACAGGACAGAGCATGACACTGCAGTGTGCCCAGGAT	NAGVTQTPKFQVLKTGQSMTLQCAQD	ATGAACCATGAATAC	MNHEY	ATGTCCTGGTATCGACAAGACCCAGGCATGGGGCTGAGGCTGATTCATTAC	MSWYRQDPGMGLRLIHY	TCAGTTGGTGCTGGTATC	SVGAGI
Pat_453	KW11	ACACCGGGTGCAGGTA	TCRbeta	tig00000010_ACACCGGGTGCAGGTA	1237	499	1	AATGCTGGTGTCACTCAGACCCCAAAATTCCAGGTCCTGAAGACAGGACAGAGCATGACACTGCAGTGTGCCCAGGATATGAACCATGAATACATGTCCTGGTATCGACAAGACCCAGGCATGGGGCTGAGGCTGATTCATTACTCAGTTGGTGCTGGTATCACTGACCAAGGAGAAGTCCCCAATGGCTACAATGTCTCCAGATCAACCACAGAGGATTTCCCGCTCAGGCTGCTGTCGGCTGCTCCCTCCCAGACATCTGTGTACTTCTGTGCCAGCAGTTATGGGGTCAGGGGTTCCAACACTGAAGCTTTCTTTGGACAAGGCACCAGACTCACAGTTGTAG	NAGVTQTPKFQVLKTGQSMTLQCAQDMNHEYMSWYRQDPGMGLRLIHYSVGAGITDQGEVPNGYNVSRSTTEDFPLRLLSAAPSQTSVYFCASSYGVRGSNTEAFFGQGTRLTVV	TRB	F	T	F	T	F	T	TRBV6-5*01	TRBD1*01	TRBJ1-1*01	AATGCTGGTGTCACTCAGACCCCAAAATTCCAGGTCCTGAAGACAGGACAGAGCATGACACTGCAGTGTGCCCAGGATATGAACCATGAATACATGTCCTGGTATCGACAAGACCCAGGCATGGGGCTGAGGCTGATTCATTACTCAGTTGGTGCTGGTATCACTGACCAAGGAGAAGTCCCCAATGGCTACAATGTCTCCAGATCAACCACAGAGGATTTCCCGCTCAGGCTGCTGTCGGCTGCTCCCTCCCAGACATCTGTGTACTTCTGTGCCAGCAGTTATGGGGTCAGGGGTTCCAACACTGAAGCTTTCTTTGGACAAGGCACCAGACTCACAGTTGTAG	AATGCTGGTGTCACTCAGACCCCAAAATTCCAGGTCCTGAAGACAGGACAGAGCATGACACTGCAGTGTGCCCAGGATATGAACCATGAATACATGTCCTGGTATCGACAAGACCCAGGCATGGGGCTGAGGCTGATTCATTACTCAGTTGGTGCTGGTATCACTGACCAAGGAGAAGTCCCCAATGGCTACAATGTCTCCAGATCAACCACAGAGGATTTCCCGCTCAGGCTGCTGTCGGCTGCTCCCTCCCAGACATCTGTGTACTTCTGTGCCAGCAGTTANNGGGACAGGGGNNNNAACACTGAAGCTTTCTTTGGACAAGGCACCAGACTCACAGTTGTAG	NAGVTQTPKFQVLKTGQSMTLQCAQDMNHEYMSWYRQDPGMGLRLIHYSVGAGITDQGEVPNGYNVSRSTTEDFPLRLLSAAPSQTSVYFCASSYGVRGSNTEAFFGQGTRLTVV	NAGVTQTPKFQVLKTGQSMTLQCAQDMNHEYMSWYRQDPGMGLRLIHYSVGAGITDQGEVPNGYNVSRSTTEDFPLRLLSAAPSQTSVYFCASSXXDRGXNTEAFFGQGTRLTVV	1	284	287	296	301	346	AATGCTGGTGTCACTCAGACCCCAAAATTCCAGGTCCTGAAGACAGGACAGAGCATGACACTGCAGTGTGCCCAGGATATGAACCATGAATACATGTCCTGGTATCGACAAGACCCAGGCATGGGGCTGAGGCTGATTCATTACTCAGTTGGTGCTGGTATCACTGACCAAGGAGAAGTCCCCAATGGCTACAATGTCTCCAGATCAACCACAGAGGATTTCCCGCTCAGGCTGCTGTCGGCTGCTCCCTCCCAGACATCTGTGTACTTCTGTGCCAGCAGTTA	NAGVTQTPKFQVLKTGQSMTLQCAQDMNHEYMSWYRQDPGMGLRLIHYSVGAGITDQGEVPNGYNVSRSTTEDFPLRLLSAAPSQTSVYFCASS	AATGCTGGTGTCACTCAGACCCCAAAATTCCAGGTCCTGAAGACAGGACAGAGCATGACACTGCAGTGTGCCCAGGATATGAACCATGAATACATGTCCTGGTATCGACAAGACCCAGGCATGGGGCTGAGGCTGATTCATTACTCAGTTGGTGCTGGTATCACTGACCAAGGAGAAGTCCCCAATGGCTACAATGTCTCCAGATCAACCACAGAGGATTTCCCGCTCAGGCTGCTGTCGGCTGCTCCCTCCCAGACATCTGTGTACTTCTGTGCCAGCAGTTA	NAGVTQTPKFQVLKTGQSMTLQCAQDMNHEYMSWYRQDPGMGLRLIHYSVGAGITDQGEVPNGYNVSRSTTEDFPLRLLSAAPSQTSVYFCASS	GGGTCAGGGG	VRG	GGGACAGGGG	DRG	AACACTGAAGCTTTCTTTGGACAAGGCACCAGACTCACAGTTGTAG	NTEAFFGQGTRLTVV	AACACTGAAGCTTTCTTTGGACAAGGCACCAGACTCACAGTTGTAG	NTEAFFGQGTRLTVV	AATGCTGGTGTCACTCAGACCCCAAAATTCCAGGTCCTGAAGACAGGACAGAGCATGACACTGCAGTGTGCCCAGGAT	NAGVTQTPKFQVLKTGQSMTLQCAQD	ATGAACCATGAATAC	MNHEY	ATGTCCTGGTATCGACAAGACCCAGGCATGGGGCTGAGGCTGATTCATTAC	MSWYRQDPGMGLRLIHY	TCAGTTGGTGCTGGTATC	SVGAGI
Pat_453	KW11	ACGGGTCCAATGTTGC	TCRbeta	tig00000014_ACGGGTCCAATGTTGC	1022	486	1	GGTGCTGTCGTCTCTCAACATCCGAGCTGGGTTATCTGTAAGAGTGGAACCTCTGTGAAGATCGAGTGCCGTCCCCTGGACTTTCAGGCCACAACTATGTTTTGGTATCGTCAGTTCCCGAAACAGAGTCTCATGCTGATGGCAACTTCCAATGAGGGCTCCAAGGCCACATACGAGCAAGGCGTCGAGAAGGACAAGTTTCTCATCAACCATGCAAGCCTGACCTTGTCCACTCTGACAGTGACCAGTGCCCATCCTGAAGACAGCAGCTTCTACATCTGCAGTGCTAGGTTAGGGTGGGGGGTGGCACGAGAGCAGTACTTCGGGCCGGGCACCAGGCTCACGGT	GAVVSQHPSWVICKSGTSVKIECRPLDFQATTMFWYRQFPKQSLMLMATSNEGSKATYEQGVEKDKFLINHASLTLSTLTVTSAHPEDSSFYICSARLGWGVAREQYFGPGTRLTV	TRB	F	T	F	T	F	F	TRBV20-1*01	TRBD2*01	TRBJ2-7*01	GGTGCTGTCGTCTCTCAACATCCGAGCTGGGTTATCTGTAAGAGTGGAACCTCTGTGAAGATCGAGTGCCGTCCCCTGGACTTTCAGGCCACAACTATGTTTTGGTATCGTCAGTTCCCGAAACAGAGTCTCATGCTGATGGCAACTTCCAATGAGGGCTCCAAGGCCACATACGAGCAAGGCGTCGAGAAGGACAAGTTTCTCATCAACCATGCAAGCCTGACCTTGTCCACTCTGACAGTGACCAGTGCCCATCCTGAAGACAGCAGCTTCTACATCTGCAGTGCTAGGTTAGGGTGGGGGGTGGCACGAGAGCAGTACTTCGGGCCGGGCACCAGGCTCACGGT	GGTGCTGTCGTCTCTCAACATCCGAGCTGGGTTATCTGTAAGAGTGGAACCTCTGTGAAGATCGAGTGCCGTTCCCTGGACTTTCAGGCCACAACTATGTTTTGGTATCGTCAGTTCCCGAAACAGAGTCTCATGCTGATGGCAACTTCCAATGAGGGCTCCAAGGCCACATACGAGCAAGGCGTCGAGAAGGACAAGTTTCTCATCAACCATGCAAGCCTGACCTTGTCCACTCTGACAGTGACCAGTGCCCATCCTGAAGACAGCAGCTTCTACATCTGCAGTGCTAGNNNNNNNNGGGGGGNNNNNNNNGAGCAGTACTTCGGGCCGGGCACCAGGCTCACGGT	GAVVSQHPSWVICKSGTSVKIECRPLDFQATTMFWYRQFPKQSLMLMATSNEGSKATYEQGVEKDKFLINHASLTLSTLTVTSAHPEDSSFYICSARLGWGVAREQYFGPGTRLTV	GAVVSQHPSWVICKSGTSVKIECRSLDFQATTMFWYRQFPKQSLMLMATSNEGSKATYEQGVEKDKFLINHASLTLSTLTVTSAHPEDSSFYICSAXXXXGXXXEQYFGPGTRLTV	1	290	299	304	313	347	GGTGCTGTCGTCTCTCAACATCCGAGCTGGGTTATCTGTAAGAGTGGAACCTCTGTGAAGATCGAGTGCCGTCCCCTGGACTTTCAGGCCACAACTATGTTTTGGTATCGTCAGTTCCCGAAACAGAGTCTCATGCTGATGGCAACTTCCAATGAGGGCTCCAAGGCCACATACGAGCAAGGCGTCGAGAAGGACAAGTTTCTCATCAACCATGCAAGCCTGACCTTGTCCACTCTGACAGTGACCAGTGCCCATCCTGAAGACAGCAGCTTCTACATCTGCAGTGCTAG	GAVVSQHPSWVICKSGTSVKIECRPLDFQATTMFWYRQFPKQSLMLMATSNEGSKATYEQGVEKDKFLINHASLTLSTLTVTSAHPEDSSFYICSA	GGTGCTGTCGTCTCTCAACATCCGAGCTGGGTTATCTGTAAGAGTGGAACCTCTGTGAAGATCGAGTGCCGTTCCCTGGACTTTCAGGCCACAACTATGTTTTGGTATCGTCAGTTCCCGAAACAGAGTCTCATGCTGATGGCAACTTCCAATGAGGGCTCCAAGGCCACATACGAGCAAGGCGTCGAGAAGGACAAGTTTCTCATCAACCATGCAAGCCTGACCTTGTCCACTCTGACAGTGACCAGTGCCCATCCTGAAGACAGCAGCTTCTACATCTGCAGTGCTAG	GAVVSQHPSWVICKSGTSVKIECRSLDFQATTMFWYRQFPKQSLMLMATSNEGSKATYEQGVEKDKFLINHASLTLSTLTVTSAHPEDSSFYICSA	GGGGGG	G	GGGGGG	G	GAGCAGTACTTCGGGCCGGGCACCAGGCTCACGGT	EQYFGPGTRLTV	GAGCAGTACTTCGGGCCGGGCACCAGGCTCACGGT	EQYFGPGTRLTV	GGTGCTGTCGTCTCTCAACATCCGAGCTGGGTTATCTGTAAGAGTGGAACCTCTGTGAAGATCGAGTGCCGTCCCCTG	GAVVSQHPSWVICKSGTSVKIECRPL	GACTTTCAGGCCACAACT	DFQATT	ATGTTTTGGTATCGTCAGTTCCCGAAACAGAGTCTCATGCTGATGGCAACT	MFWYRQFPKQSLMLMAT	TCCAATGAGGGCTCCAAGGCC	SNEGSKA
Pat_453	TW10	ACGTCAATCAACGGCC	TCRbeta	tig00000454_ACGTCAATCAACGGCC	1194	459	1	GATTCTGGAGTCACACAAACCCCAAAGCACCTGATCACAGCAACTGGACAGCGAGTGACGCTGAGATGCTCCCCTAGGTCTGGAGACCTCTCTGTGTACTGGTACCAACAGAGCCTGGACCAGGGCCTCCAGTTCCTCATTCAGTATTATAATGGAGAAGAGAGAGCAAAAGGAAACATTCTTGAACGATTCTCCGCACAACAGTTCCCTGACTTGCACTCTGAACTAAACCTGAGCTCTCTGGAGCTGGGGGACTCAGCTTTGTATTTCTGTGCCAGCAGCTCCAACGGAGCCTACGACGATGAGCAGTTCTTCGGGCCAGGGACACGGCTCACCGTGCTAG	DSGVTQTPKHLITATGQRVTLRCSPRSGDLSVYWYQQSLDQGLQFLIQYYNGEERAKGNILERFSAQQFPDLHSELNLSSLELGDSALYFCASSSNGAYDDEQFFGPGTRLTVL	TRB	F	T	F	T	F	T	TRBV9*01		TRBJ2-1*01	GATTCTGGAGTCACACAAACCCCAAAGCACCTGATCACAGCAACTGGACAGCGAGTGACGCTGAGATGCTCCCCTAGGTCTGGAGACCTCTCTGTGTACTGGTACCAACAGAGCCTGGACCAGGGCCTCCAGTTCCTCATTCAGTATTATAATGGAGAAGAGAGAGCAAAAGGAAACATTCTTGAACGATTCTCCGCACAACAGTTCCCTGACTTGCACTCTGAACTAAACCTGAGCTCTCTGGAGCTGGGGGACTCAGCTTTGTATTTCTGTGCCAGCAGCTCCAACGGAGCCTACGACGATGAGCAGTTCTTCGGGCCAGGGACACGGCTCACCGTGCTAG	GATTCTGGAGTCACACAAACCCCAAAGCACCTGATCACAGCAACTGGACAGCGAGTGACGCTGAGATGCTCCCCTAGGTCTGGAGACCTCTCTGTGTACTGGTACCAACAGAGCCTGGACCAGGGCCTCCAGTTCCTCATTCAGTATTATAATGGAGAAGAGAGAGCAAAAGGAAACATTCTTGAACGATTCTCCGCACAACAGTTCCCTGACTTGCACTCTGAACTAAACCTGAGCTCTCTGGAGCTGGGGGACTCAGCTTTGTATTTCTGTGCCAGCAGCNNNNNNNNNNNNNNNNNNNATGAGCAGTTCTTCGGGCCAGGGACACGGCTCACCGTGCTAG	DSGVTQTPKHLITATGQRVTLRCSPRSGDLSVYWYQQSLDQGLQFLIQYYNGEERAKGNILERFSAQQFPDLHSELNLSSLELGDSALYFCASSSNGAYDDEQFFGPGTRLTVL	DSGVTQTPKHLITATGQRVTLRCSPRSGDLSVYWYQQSLDQGLQFLIQYYNGEERAKGNILERFSAQQFPDLHSELNLSSLELGDSALYFCASSXXXXXXXEQFFGPGTRLTVL	1	282			302	343	GATTCTGGAGTCACACAAACCCCAAAGCACCTGATCACAGCAACTGGACAGCGAGTGACGCTGAGATGCTCCCCTAGGTCTGGAGACCTCTCTGTGTACTGGTACCAACAGAGCCTGGACCAGGGCCTCCAGTTCCTCATTCAGTATTATAATGGAGAAGAGAGAGCAAAAGGAAACATTCTTGAACGATTCTCCGCACAACAGTTCCCTGACTTGCACTCTGAACTAAACCTGAGCTCTCTGGAGCTGGGGGACTCAGCTTTGTATTTCTGTGCCAGCAGC	DSGVTQTPKHLITATGQRVTLRCSPRSGDLSVYWYQQSLDQGLQFLIQYYNGEERAKGNILERFSAQQFPDLHSELNLSSLELGDSALYFCASS	GATTCTGGAGTCACACAAACCCCAAAGCACCTGATCACAGCAACTGGACAGCGAGTGACGCTGAGATGCTCCCCTAGGTCTGGAGACCTCTCTGTGTACTGGTACCAACAGAGCCTGGACCAGGGCCTCCAGTTCCTCATTCAGTATTATAATGGAGAAGAGAGAGCAAAAGGAAACATTCTTGAACGATTCTCCGCACAACAGTTCCCTGACTTGCACTCTGAACTAAACCTGAGCTCTCTGGAGCTGGGGGACTCAGCTTTGTATTTCTGTGCCAGCAGC	DSGVTQTPKHLITATGQRVTLRCSPRSGDLSVYWYQQSLDQGLQFLIQYYNGEERAKGNILERFSAQQFPDLHSELNLSSLELGDSALYFCASS					ATGAGCAGTTCTTCGGGCCAGGGACACGGCTCACCGTGCTAG	EQFFGPGTRLTVL	ATGAGCAGTTCTTCGGGCCAGGGACACGGCTCACCGTGCTAG	EQFFGPGTRLTVL	GATTCTGGAGTCACACAAACCCCAAAGCACCTGATCACAGCAACTGGACAGCGAGTGACGCTGAGATGCTCCCCTAGG	DSGVTQTPKHLITATGQRVTLRCSPR	TCTGGAGACCTCTCT	SGDLS	GTGTACTGGTACCAACAGAGCCTGGACCAGGGCCTCCAGTTCCTCATTCAG	VYWYQQSLDQGLQFLIQ	TATTATAATGGAGAAGAG	YYNGEE
Pat_453	KW11	CAGCAGCTCCGCTGTT	TCRbeta	tig00000001_CAGCAGCTCCGCTGTT	1077	501	1	GACACTGAAGTTACCCAGACACCAAAACACCTGGTCATGGGAATGACAAATAAGAAGTCTTTGAAATGTGAACAACATATGGGGCACAGGGCTATGTATTGGTACAAGCAGAAAGCTAAGAAGCCACCGGAGCTCATGTTTGTCTACAGCTATGAGAAACTCTCTATAAATGAAAGTGTGCCAAGTCGCTTCTCACCTGAATGCCCCAACAGCTCTCTCTTAAACCTTCACCTACACGCCCTGCAGCCAGAAGACTCAGCCCTGTATCTCTGCGCCAGCAGCCAAGTAATATCTACGGGTACCTACGAGCAGTACTTCGGGCCGGGCACCAGGCTCACGGTCACAG	DTEVTQTPKHLVMGMTNKKSLKCEQHMGHRAMYWYKQKAKKPPELMFVYSYEKLSINESVPSRFSPECPNSSLLNLHLHALQPEDSALYLCASSQVISTGTYEQYFGPGTRLTVT	TRB	F	T	F	T	F	T	TRBV4-1*01		TRBJ2-7*01	GACACTGAAGTTACCCAGACACCAAAACACCTGGTCATGGGAATGACAAATAAGAAGTCTTTGAAATGTGAACAACATATGGGGCACAGGGCTATGTATTGGTACAAGCAGAAAGCTAAGAAGCCACCGGAGCTCATGTTTGTCTACAGCTATGAGAAACTCTCTATAAATGAAAGTGTGCCAAGTCGCTTCTCACCTGAATGCCCCAACAGCTCTCTCTTAAACCTTCACCTACACGCCCTGCAGCCAGAAGACTCAGCCCTGTATCTCTGCGCCAGCAGCCAAGTAATATCTACGGGTACCTACGAGCAGTACTTCGGGCCGGGCACCAGGCTCACGGTCACAG	GACACTGAAGTTACCCAGACACCAAAACACCTGGTCATGGGAATGACAAATAAGAAGTCTTTGAAATGTGAACAACATATGGGGCACAGGGCTATGTATTGGTACAAGCAGAAAGCTAAGAAGCCACCGGAGCTCATGTTTGTCTACAGCTATGAGAAACTCTCTATAAATGAAAGTGTGCCAAGTCGCTTCTCACCTGAATGCCCCAACAGCTCTCTCTTAAACCTTCACCTACACGCCCTGCAGCCAGAAGACTCAGCCCTGTATCTCTGCGCCAGCAGCCAAGNNNNNNNNNNNNNNNCCTACGAGCAGTACTTCGGGCCGGGCACCAGGCTCACGGTCACAG	DTEVTQTPKHLVMGMTNKKSLKCEQHMGHRAMYWYKQKAKKPPELMFVYSYEKLSINESVPSRFSPECPNSSLLNLHLHALQPEDSALYLCASSQVISTGTYEQYFGPGTRLTVT	DTEVTQTPKHLVMGMTNKKSLKCEQHMGHRAMYWYKQKAKKPPELMFVYSYEKLSINESVPSRFSPECPNSSLLNLHLHALQPEDSALYLCASSQXXXXXXYEQYFGPGTRLTVT	1	286			302	346	GACACTGAAGTTACCCAGACACCAAAACACCTGGTCATGGGAATGACAAATAAGAAGTCTTTGAAATGTGAACAACATATGGGGCACAGGGCTATGTATTGGTACAAGCAGAAAGCTAAGAAGCCACCGGAGCTCATGTTTGTCTACAGCTATGAGAAACTCTCTATAAATGAAAGTGTGCCAAGTCGCTTCTCACCTGAATGCCCCAACAGCTCTCTCTTAAACCTTCACCTACACGCCCTGCAGCCAGAAGACTCAGCCCTGTATCTCTGCGCCAGCAGCCAAG	DTEVTQTPKHLVMGMTNKKSLKCEQHMGHRAMYWYKQKAKKPPELMFVYSYEKLSINESVPSRFSPECPNSSLLNLHLHALQPEDSALYLCASSQ	GACACTGAAGTTACCCAGACACCAAAACACCTGGTCATGGGAATGACAAATAAGAAGTCTTTGAAATGTGAACAACATATGGGGCACAGGGCTATGTATTGGTACAAGCAGAAAGCTAAGAAGCCACCGGAGCTCATGTTTGTCTACAGCTATGAGAAACTCTCTATAAATGAAAGTGTGCCAAGTCGCTTCTCACCTGAATGCCCCAACAGCTCTCTCTTAAACCTTCACCTACACGCCCTGCAGCCAGAAGACTCAGCCCTGTATCTCTGCGCCAGCAGCCAAG	DTEVTQTPKHLVMGMTNKKSLKCEQHMGHRAMYWYKQKAKKPPELMFVYSYEKLSINESVPSRFSPECPNSSLLNLHLHALQPEDSALYLCASSQ					CCTACGAGCAGTACTTCGGGCCGGGCACCAGGCTCACGGTCACAG	YEQYFGPGTRLTVT	CCTACGAGCAGTACTTCGGGCCGGGCACCAGGCTCACGGTCACAG	YEQYFGPGTRLTVT	GACACTGAAGTTACCCAGACACCAAAACACCTGGTCATGGGAATGACAAATAAGAAGTCTTTGAAATGTGAACAACAT	DTEVTQTPKHLVMGMTNKKSLKCEQH	ATGGGGCACAGGGCT	MGHRA	ATGTATTGGTACAAGCAGAAAGCTAAGAAGCCACCGGAGCTCATGTTTGTC	MYWYKQKAKKPPELMFV	TACAGCTATGAGAAACTC	YSYEKL
Pat_453	IW9	CAGCATAAGGCAATTA	TCRbeta	tig00000003_CAGCATAAGGCAATTA	1195	500	1	GAAGCTGGAGTTGCCCAGTCTCCCAGATATAAGATTATAGAGAAAAGGCAGAGTGTGGCTTTTTGGTGCAATCCTATATCTGGCCATGCTACCCTTTACTGGTACCAGCAGATCCTGGGACAGGGCCCAAAGCTTCTGATTCAGTTTCAGAATAACGGTGTAGTGGATGATTCACAGTTGCCTAAGGATCGATTTTCTGCAGAGAGGCTCAAAGGAGTAGACTCCACTCTCAAGATCCAGCCTGCAAAGCTTGAGGACTCGGCCGTGTATCTCTGTGCCAGCAGCTTAGGGGCAGGGAAGGACATTCAGTACTTCGGCGCCGGGACCCGGCTCTCAGTGCTGG	EAGVAQSPRYKIIEKRQSVAFWCNPISGHATLYWYQQILGQGPKLLIQFQNNGVVDDSQLPKDRFSAERLKGVDSTLKIQPAKLEDSAVYLCASSLGAGKDIQYFGAGTRLSVL	TRB	F	T	F	T	F	T	TRBV11-2*01	TRBD1*01	TRBJ2-4*01	GAAGCTGGAGTTGCCCAGTCTCCCAGATATAAGATTATAGAGAAAAGGCAGAGTGTGGCTTTTTGGTGCAATCCTATATCTGGCCATGCTACCCTTTACTGGTACCAGCAGATCCTGGGACAGGGCCCAAAGCTTCTGATTCAGTTTCAGAATAACGGTGTAGTGGATGATTCACAGTTGCCTAAGGATCGATTTTCTGCAGAGAGGCTCAAAGGAGTAGACTCCACTCTCAAGATCCAGCCTGCAAAGCTTGAGGACTCGGCCGTGTATCTCTGTGCCAGCAGCTTAGGGGCAGGGAAGGACATTCAGTACTTCGGCGCCGGGACCCGGCTCTCAGTGCTGG	GAAGCTGGAGTTGCCCAGTCTCCCAGATATAAGATTATAGAGAAAAGGCAGAGTGTGGCTTTTTGGTGCAATCCTATATCTGGCCATGCTACCCTTTACTGGTACCAGCAGATCCTGGGACAGGGCCCAAAGCTTCTGATTCAGTTTCAGAATAACGGTGTAGTGGATGATTCACAGTTGCCTAAGGATCGATTTTCTGCAGAGAGGCTCAAAGGAGTAGACTCCACTCTCAAGATCCAGCCTGCAAAGCTTGAGGACTCGGCCGTGTATCTCTGTGCCAGCAGCTTAGNNNCAGGGNNNNACATTCAGTACTTCGGCGCCGGGACCCGGCTCTCAGTGCTGG	EAGVAQSPRYKIIEKRQSVAFWCNPISGHATLYWYQQILGQGPKLLIQFQNNGVVDDSQLPKDRFSAERLKGVDSTLKIQPAKLEDSAVYLCASSLGAGKDIQYFGAGTRLSVL	EAGVAQSPRYKIIEKRQSVAFWCNPISGHATLYWYQQILGQGPKLLIQFQNNGVVDDSQLPKDRFSAERLKGVDSTLKIQPAKLEDSAVYLCASSLXXGXXIQYFGAGTRLSVL	1	289	293	297	302	343	GAAGCTGGAGTTGCCCAGTCTCCCAGATATAAGATTATAGAGAAAAGGCAGAGTGTGGCTTTTTGGTGCAATCCTATATCTGGCCATGCTACCCTTTACTGGTACCAGCAGATCCTGGGACAGGGCCCAAAGCTTCTGATTCAGTTTCAGAATAACGGTGTAGTGGATGATTCACAGTTGCCTAAGGATCGATTTTCTGCAGAGAGGCTCAAAGGAGTAGACTCCACTCTCAAGATCCAGCCTGCAAAGCTTGAGGACTCGGCCGTGTATCTCTGTGCCAGCAGCTTAG	EAGVAQSPRYKIIEKRQSVAFWCNPISGHATLYWYQQILGQGPKLLIQFQNNGVVDDSQLPKDRFSAERLKGVDSTLKIQPAKLEDSAVYLCASSL	GAAGCTGGAGTTGCCCAGTCTCCCAGATATAAGATTATAGAGAAAAGGCAGAGTGTGGCTTTTTGGTGCAATCCTATATCTGGCCATGCTACCCTTTACTGGTACCAGCAGATCCTGGGACAGGGCCCAAAGCTTCTGATTCAGTTTCAGAATAACGGTGTAGTGGATGATTCACAGTTGCCTAAGGATCGATTTTCTGCAGAGAGGCTCAAAGGAGTAGACTCCACTCTCAAGATCCAGCCTGCAAAGCTTGAGGACTCGGCCGTGTATCTCTGTGCCAGCAGCTTAG	EAGVAQSPRYKIIEKRQSVAFWCNPISGHATLYWYQQILGQGPKLLIQFQNNGVVDDSQLPKDRFSAERLKGVDSTLKIQPAKLEDSAVYLCASSL	CAGGG	G	CAGGG	G	ACATTCAGTACTTCGGCGCCGGGACCCGGCTCTCAGTGCTGG	IQYFGAGTRLSVL	ACATTCAGTACTTCGGCGCCGGGACCCGGCTCTCAGTGCTGG	IQYFGAGTRLSVL	GAAGCTGGAGTTGCCCAGTCTCCCAGATATAAGATTATAGAGAAAAGGCAGAGTGTGGCTTTTTGGTGCAATCCTATA	EAGVAQSPRYKIIEKRQSVAFWCNPI	TCTGGCCATGCTACC	SGHAT	CTTTACTGGTACCAGCAGATCCTGGGACAGGGCCCAAAGCTTCTGATTCAG	LYWYQQILGQGPKLLIQ	TTTCAGAATAACGGTGTA	FQNNGV
Pat_453	KW11	CATGGCGTCAGTTAGC	TCRbeta	tig00000259_CATGGCGTCAGTTAGC	1196	137	1	AATGCTGGTGTCACTCAGACCCCAAAATTCCAGGTCCTGAAGACAGGACAGAGCATGACACTGCAGTGTGCCCAGGATATGAACCATGAATACATGTCCTGGTATCGACAAGACCCAGGCATGGGGCTGAGGCTGATTCATTACTCAGTTGGTGCTGGTATCACTGACCAAGGAGAAGTCCCCAATGGCTACAATGTCTCCAGATCAACCACAGAGGATTTCCCGCTCAGGCTGCTGTCGGCTGCTCCCTCCCAGACATCTGTGTACTTCTGTGCCAGCAGTCGGACAGGGGCTATCAATCAGCCCCAGCATTTTGGTGATGGGACTCGACTCTCCATCCTAG	NAGVTQTPKFQVLKTGQSMTLQCAQDMNHEYMSWYRQDPGMGLRLIHYSVGAGITDQGEVPNGYNVSRSTTEDFPLRLLSAAPSQTSVYFCASSRTGAINQPQHFGDGTRLSIL	TRB	F	T	F	T	F	T	TRBV6-5*01	TRBD1*01	TRBJ1-5*01	AATGCTGGTGTCACTCAGACCCCAAAATTCCAGGTCCTGAAGACAGGACAGAGCATGACACTGCAGTGTGCCCAGGATATGAACCATGAATACATGTCCTGGTATCGACAAGACCCAGGCATGGGGCTGAGGCTGATTCATTACTCAGTTGGTGCTGGTATCACTGACCAAGGAGAAGTCCCCAATGGCTACAATGTCTCCAGATCAACCACAGAGGATTTCCCGCTCAGGCTGCTGTCGGCTGCTCCCTCCCAGACATCTGTGTACTTCTGTGCCAGCAGTCGGACAGGGGCTATCAATCAGCCCCAGCATTTTGGTGATGGGACTCGACTCTCCATCCTAG	AATGCTGGTGTCACTCAGACCCCAAAATTCCAGGTCCTGAAGACAGGACAGAGCATGACACTGCAGTGTGCCCAGGATATGAACCATGAATACATGTCCTGGTATCGACAAGACCCAGGCATGGGGCTGAGGCTGATTCATTACTCAGTTGGTGCTGGTATCACTGACCAAGGAGAAGTCCCCAATGGCTACAATGTCTCCAGATCAACCACAGAGGATTTCCCGCTCAGGCTGCTGTCGGCTGCTCCCTCCCAGACATCTGTGTACTTCTGTGCCAGCAGTNGGACAGGGGNNNNCAATCAGCCCCAGCATTTTGGTGATGGGACTCGACTCTCCATCCTAG	NAGVTQTPKFQVLKTGQSMTLQCAQDMNHEYMSWYRQDPGMGLRLIHYSVGAGITDQGEVPNGYNVSRSTTEDFPLRLLSAAPSQTSVYFCASSRTGAINQPQHFGDGTRLSIL	NAGVTQTPKFQVLKTGQSMTLQCAQDMNHEYMSWYRQDPGMGLRLIHYSVGAGITDQGEVPNGYNVSRSTTEDFPLRLLSAAPSQTSVYFCASSXTGXXNQPQHFGDGTRLSIL	1	282	284	292	297	343	AATGCTGGTGTCACTCAGACCCCAAAATTCCAGGTCCTGAAGACAGGACAGAGCATGACACTGCAGTGTGCCCAGGATATGAACCATGAATACATGTCCTGGTATCGACAAGACCCAGGCATGGGGCTGAGGCTGATTCATTACTCAGTTGGTGCTGGTATCACTGACCAAGGAGAAGTCCCCAATGGCTACAATGTCTCCAGATCAACCACAGAGGATTTCCCGCTCAGGCTGCTGTCGGCTGCTCCCTCCCAGACATCTGTGTACTTCTGTGCCAGCAGT	NAGVTQTPKFQVLKTGQSMTLQCAQDMNHEYMSWYRQDPGMGLRLIHYSVGAGITDQGEVPNGYNVSRSTTEDFPLRLLSAAPSQTSVYFCASS	AATGCTGGTGTCACTCAGACCCCAAAATTCCAGGTCCTGAAGACAGGACAGAGCATGACACTGCAGTGTGCCCAGGATATGAACCATGAATACATGTCCTGGTATCGACAAGACCCAGGCATGGGGCTGAGGCTGATTCATTACTCAGTTGGTGCTGGTATCACTGACCAAGGAGAAGTCCCCAATGGCTACAATGTCTCCAGATCAACCACAGAGGATTTCCCGCTCAGGCTGCTGTCGGCTGCTCCCTCCCAGACATCTGTGTACTTCTGTGCCAGCAGT	NAGVTQTPKFQVLKTGQSMTLQCAQDMNHEYMSWYRQDPGMGLRLIHYSVGAGITDQGEVPNGYNVSRSTTEDFPLRLLSAAPSQTSVYFCASS	GGACAGGGG	TG	GGACAGGGG	TG	CAATCAGCCCCAGCATTTTGGTGATGGGACTCGACTCTCCATCCTAG	NQPQHFGDGTRLSIL	CAATCAGCCCCAGCATTTTGGTGATGGGACTCGACTCTCCATCCTAG	NQPQHFGDGTRLSIL	AATGCTGGTGTCACTCAGACCCCAAAATTCCAGGTCCTGAAGACAGGACAGAGCATGACACTGCAGTGTGCCCAGGAT	NAGVTQTPKFQVLKTGQSMTLQCAQD	ATGAACCATGAATAC	MNHEY	ATGTCCTGGTATCGACAAGACCCAGGCATGGGGCTGAGGCTGATTCATTAC	MSWYRQDPGMGLRLIHY	TCAGTTGGTGCTGGTATC	SVGAGI
Pat_453	KW11	CCAATCCTCTTTCCTC	TCRbeta	tig00000002_CCAATCCTCTTTCCTC	1061	365	1	GGTGCTGGAGTCTCCCAGTCTCCCAGGTACAAAGTCACAAAGAGGGGACAGGATGTAGCTCTCAGGTGTGATCCAATTTCGGGTCATGTATCCCTTTATTGGTACCGACAGGCCCTGGGGCAGGGCCCAGAGTTTCTGACTTACTTCAATTATGAAGCCCAACAAGACAAATCAGGGCTGCCCAATGATCGGTTCTCTGCAGAGAGGCCTGAGGGATCCATCTCCACTCTGACGATCCAGCGCACAGAGCAGCGGGACTCGGCCATGTATCGCTGTGCCAGCAGCTGGGGGACGGGCACAGATACGCAGTATTTTGGCCCAGGCACCCGGCTGACAGTGCTCG	GAGVSQSPRYKVTKRGQDVALRCDPISGHVSLYWYRQALGQGPEFLTYFNYEAQQDKSGLPNDRFSAERPEGSISTLTIQRTEQRDSAMYRCASSWGTGTDTQYFGPGTRLTVL	TRB	F	T	F	T	F	T	TRBV7-6*01	TRBD1*01	TRBJ2-3*01	GGTGCTGGAGTCTCCCAGTCTCCCAGGTACAAAGTCACAAAGAGGGGACAGGATGTAGCTCTCAGGTGTGATCCAATTTCGGGTCATGTATCCCTTTATTGGTACCGACAGGCCCTGGGGCAGGGCCCAGAGTTTCTGACTTACTTCAATTATGAAGCCCAACAAGACAAATCAGGGCTGCCCAATGATCGGTTCTCTGCAGAGAGGCCTGAGGGATCCATCTCCACTCTGACGATCCAGCGCACAGAGCAGCGGGACTCGGCCATGTATCGCTGTGCCAGCAGCTGGGGGACGGGCACAGATACGCAGTATTTTGGCCCAGGCACCCGGCTGACAGTGCTCG	GGTGCTGGAGTCTCCCAGTCTCCCAGGTACAAAGTCACAAAGAGGGGACAGGATGTAGCTCTCAGGTGTGATCCAATTTCGGGTCATGTATCCCTTTATTGGTACCGACAGGCCCTGGGGCAGGGCCCAGAGTTTCTGACTTACTTCAATTATGAAGCCCAACAAGACAAATCAGGGCTGCCCAATGATCGGTTCTCTGCAGAGAGGCCTGAGGGATCCATCTCCACTCTGACGATCCAGCGCACAGAGCAGCGGGACTCGGCCATGTATCGCTGTGCCAGCAGCTNNGGGACNNGCACAGATACGCAGTATTTTGGCCCAGGCACCCGGCTGACAGTGCTCG	GAGVSQSPRYKVTKRGQDVALRCDPISGHVSLYWYRQALGQGPEFLTYFNYEAQQDKSGLPNDRFSAERPEGSISTLTIQRTEQRDSAMYRCASSWGTGTDTQYFGPGTRLTVL	GAGVSQSPRYKVTKRGQDVALRCDPISGHVSLYWYRQALGQGPEFLTYFNYEAQQDKSGLPNDRFSAERPEGSISTLTIQRTEQRDSAMYRCASSXGTXTDTQYFGPGTRLTVL	1	286	289	293	296	343	GGTGCTGGAGTCTCCCAGTCTCCCAGGTACAAAGTCACAAAGAGGGGACAGGATGTAGCTCTCAGGTGTGATCCAATTTCGGGTCATGTATCCCTTTATTGGTACCGACAGGCCCTGGGGCAGGGCCCAGAGTTTCTGACTTACTTCAATTATGAAGCCCAACAAGACAAATCAGGGCTGCCCAATGATCGGTTCTCTGCAGAGAGGCCTGAGGGATCCATCTCCACTCTGACGATCCAGCGCACAGAGCAGCGGGACTCGGCCATGTATCGCTGTGCCAGCAGCT	GAGVSQSPRYKVTKRGQDVALRCDPISGHVSLYWYRQALGQGPEFLTYFNYEAQQDKSGLPNDRFSAERPEGSISTLTIQRTEQRDSAMYRCASS	GGTGCTGGAGTCTCCCAGTCTCCCAGGTACAAAGTCACAAAGAGGGGACAGGATGTAGCTCTCAGGTGTGATCCAATTTCGGGTCATGTATCCCTTTATTGGTACCGACAGGCCCTGGGGCAGGGCCCAGAGTTTCTGACTTACTTCAATTATGAAGCCCAACAAGACAAATCAGGGCTGCCCAATGATCGGTTCTCTGCAGAGAGGCCTGAGGGATCCATCTCCACTCTGACGATCCAGCGCACAGAGCAGCGGGACTCGGCCATGTATCGCTGTGCCAGCAGCT	GAGVSQSPRYKVTKRGQDVALRCDPISGHVSLYWYRQALGQGPEFLTYFNYEAQQDKSGLPNDRFSAERPEGSISTLTIQRTEQRDSAMYRCASS	GGGAC	GT	GGGAC	GT	GCACAGATACGCAGTATTTTGGCCCAGGCACCCGGCTGACAGTGCTCG	TDTQYFGPGTRLTVL	GCACAGATACGCAGTATTTTGGCCCAGGCACCCGGCTGACAGTGCTCG	TDTQYFGPGTRLTVL	GGTGCTGGAGTCTCCCAGTCTCCCAGGTACAAAGTCACAAAGAGGGGACAGGATGTAGCTCTCAGGTGTGATCCAATT	GAGVSQSPRYKVTKRGQDVALRCDPI	TCGGGTCATGTATCC	SGHVS	CTTTATTGGTACCGACAGGCCCTGGGGCAGGGCCCAGAGTTTCTGACTTAC	LYWYRQALGQGPEFLTY	TTCAATTATGAAGCCCAA	FNYEAQ
Pat_453	KW11	CTAATGGGTTGGACCC	TCRbeta	tig00000032_CTAATGGGTTGGACCC	956	286	1	GACGCTGGAGTCACCCAAAGTCCCACACACCTGATCAAAACGAGAGGACAGCAAGTGACTCTGAGATGCTCTCCTAAGTCTGGGCATGACACTGTGTCCTGGTACCAACAGGCCCTGGGTCAGGGGCCCCAGTTTATCTTTCAGTATTATGAGGAGGAAGAGAGACAGAGAGGCAACTTCCCTGATCGATTCTCAGGTCACCAGTTCCCTAACTATAGCTCTGAGCTGAATGTGAACGCCTTGTTGCTGGGGGACTCGGCCCTCTATCTCTGTGCCAGCAGCTTGGGCGCCTCTGGAAACACCATATATTTTGGAGAGGGAAGTTGGCTCACTGTTGTAG	DAGVTQSPTHLIKTRGQQVTLRCSPKSGHDTVSWYQQALGQGPQFIFQYYEEEERQRGNFPDRFSGHQFPNYSSELNVNALLLGDSALYLCASSLGASGNTIYFGEGSWLTVV	TRB	F	T	F	T	F	T	TRBV5-6*01		TRBJ1-3*01	GACGCTGGAGTCACCCAAAGTCCCACACACCTGATCAAAACGAGAGGACAGCAAGTGACTCTGAGATGCTCTCCTAAGTCTGGGCATGACACTGTGTCCTGGTACCAACAGGCCCTGGGTCAGGGGCCCCAGTTTATCTTTCAGTATTATGAGGAGGAAGAGAGACAGAGAGGCAACTTCCCTGATCGATTCTCAGGTCACCAGTTCCCTAACTATAGCTCTGAGCTGAATGTGAACGCCTTGTTGCTGGGGGACTCGGCCCTCTATCTCTGTGCCAGCAGCTTGGGCGCCTCTGGAAACACCATATATTTTGGAGAGGGAAGTTGGCTCACTGTTGTAG	GACGCTGGAGTCACCCAAAGTCCCACACACCTGATCAAAACGAGAGGACAGCAAGTGACTCTGAGATGCTCTCCTAAGTCTGGGCATGACACTGTGTCCTGGTACCAACAGGCCCTGGGTCAGGGGCCCCAGTTTATCTTTCAGTATTATGAGGAGGAAGAGAGACAGAGAGGCAACTTCCCTGATCGATTCTCAGGTCACCAGTTCCCTAACTATAGCTCTGAGCTGAATGTGAACGCCTTGTTGCTGGGGGACTCGGCCCTCTATCTCTGTGCCAGCAGCTTGGNNNNCTCTGGAAACACCATATATTTTGGAGAGGGAAGTTGGCTCACTGTTGTAG	DAGVTQSPTHLIKTRGQQVTLRCSPKSGHDTVSWYQQALGQGPQFIFQYYEEEERQRGNFPDRFSGHQFPNYSSELNVNALLLGDSALYLCASSLGASGNTIYFGEGSWLTVV	DAGVTQSPTHLIKTRGQQVTLRCSPKSGHDTVSWYQQALGQGPQFIFQYYEEEERQRGNFPDRFSGHQFPNYSSELNVNALLLGDSALYLCASSLXXSGNTIYFGEGSWLTVV	1	286			291	340	GACGCTGGAGTCACCCAAAGTCCCACACACCTGATCAAAACGAGAGGACAGCAAGTGACTCTGAGATGCTCTCCTAAGTCTGGGCATGACACTGTGTCCTGGTACCAACAGGCCCTGGGTCAGGGGCCCCAGTTTATCTTTCAGTATTATGAGGAGGAAGAGAGACAGAGAGGCAACTTCCCTGATCGATTCTCAGGTCACCAGTTCCCTAACTATAGCTCTGAGCTGAATGTGAACGCCTTGTTGCTGGGGGACTCGGCCCTCTATCTCTGTGCCAGCAGCTTGG	DAGVTQSPTHLIKTRGQQVTLRCSPKSGHDTVSWYQQALGQGPQFIFQYYEEEERQRGNFPDRFSGHQFPNYSSELNVNALLLGDSALYLCASSL	GACGCTGGAGTCACCCAAAGTCCCACACACCTGATCAAAACGAGAGGACAGCAAGTGACTCTGAGATGCTCTCCTAAGTCTGGGCATGACACTGTGTCCTGGTACCAACAGGCCCTGGGTCAGGGGCCCCAGTTTATCTTTCAGTATTATGAGGAGGAAGAGAGACAGAGAGGCAACTTCCCTGATCGATTCTCAGGTCACCAGTTCCCTAACTATAGCTCTGAGCTGAATGTGAACGCCTTGTTGCTGGGGGACTCGGCCCTCTATCTCTGTGCCAGCAGCTTGG	DAGVTQSPTHLIKTRGQQVTLRCSPKSGHDTVSWYQQALGQGPQFIFQYYEEEERQRGNFPDRFSGHQFPNYSSELNVNALLLGDSALYLCASSL					CTCTGGAAACACCATATATTTTGGAGAGGGAAGTTGGCTCACTGTTGTAG	SGNTIYFGEGSWLTVV	CTCTGGAAACACCATATATTTTGGAGAGGGAAGTTGGCTCACTGTTGTAG	SGNTIYFGEGSWLTVV	GACGCTGGAGTCACCCAAAGTCCCACACACCTGATCAAAACGAGAGGACAGCAAGTGACTCTGAGATGCTCTCCTAAG	DAGVTQSPTHLIKTRGQQVTLRCSPK	TCTGGGCATGACACT	SGHDT	GTGTCCTGGTACCAACAGGCCCTGGGTCAGGGGCCCCAGTTTATCTTTCAG	VSWYQQALGQGPQFIFQ	TATTATGAGGAGGAAGAG	YYEEEE
Pat_453	KW11	CTACCCAGTCTCATCC	TCRbeta	tig00000158_CTACCCAGTCTCATCC	860	139	1	AATGCTGGTGTCACTCAGACCCCAAAATTCCAGGTCCTGAAGACAGGACAGAGCATGACACTGCAGTGTGCCCAGGATATGAACCATAACTCCATGTACTGGTATCGACAAGACCCAGGCATGGGACTGAGGCTGATTTATTACTCAGCTTCTGAGGGTACCACTGACAAAGGAGAAGTCCCCAATGGCTACAATGTCTCCAGATTAAACAAACGGGAGTTCTTGCTCAGGCTGGAGTCGGCTGCTCCCTCCCAGACATCTGTGTACTTCTGTGCCAGCAGCGCAGGGGGAGGGACCGGGGAGCTGTTTTTTGGAGAAGGCTCTAGGCTGACCGTACTGG	NAGVTQTPKFQVLKTGQSMTLQCAQDMNHNSMYWYRQDPGMGLRLIYYSASEGTTDKGEVPNGYNVSRLNKREFLLRLESAAPSQTSVYFCASSAGGGTGELFFGEGSRLTVL	TRB	F	T	F	T	F	T	TRBV6-1*01	TRBD2*02	TRBJ2-2*01	AATGCTGGTGTCACTCAGACCCCAAAATTCCAGGTCCTGAAGACAGGACAGAGCATGACACTGCAGTGTGCCCAGGATATGAACCATAACTCCATGTACTGGTATCGACAAGACCCAGGCATGGGACTGAGGCTGATTTATTACTCAGCTTCTGAGGGTACCACTGACAAAGGAGAAGTCCCCAATGGCTACAATGTCTCCAGATTAAACAAACGGGAGTTCTTGCTCAGGCTGGAGTCGGCTGCTCCCTCCCAGACATCTGTGTACTTCTGTGCCAGCAGCGCAGGGGGAGGGACCGGGGAGCTGTTTTTTGGAGAAGGCTCTAGGCTGACCGTACTGG	AATGCTGGTGTCACTCAGACCCCAAAATTCCAGGTCCTGAAGACAGGACAGAGCATGACACTGCAGTGTGCCCAGGATATGAACCATAACTCCATGTACTGGTATCGACAAGACCCAGGCATGGGACTGAGGCTGATTTATTACTCAGCTTCTGAGGGTACCACTGACAAAGGAGAAGTCCCCAATGGCTACAATGTCTCCAGATTAAACAAACGGGAGTTCTCGCTCAGGCTGGAGTCGGCTGCTCCCTCCCAGACATCTGTGTACTTCTGTGCCAGCAGTGAAGNGGGAGGGACCGGGGAGCTGTTTTTTGGAGAAGGCTCTAGGCTGACCGTACTGG	NAGVTQTPKFQVLKTGQSMTLQCAQDMNHNSMYWYRQDPGMGLRLIYYSASEGTTDKGEVPNGYNVSRLNKREFLLRLESAAPSQTSVYFCASSAGGGTGELFFGEGSRLTVL	NAGVTQTPKFQVLKTGQSMTLQCAQDMNHNSMYWYRQDPGMGLRLIYYSASEGTTDKGEVPNGYNVSRLNKREFSLRLESAAPSQTSVYFCASSEXGGTGELFFGEGSRLTVL	1	286	288	294	295	340	AATGCTGGTGTCACTCAGACCCCAAAATTCCAGGTCCTGAAGACAGGACAGAGCATGACACTGCAGTGTGCCCAGGATATGAACCATAACTCCATGTACTGGTATCGACAAGACCCAGGCATGGGACTGAGGCTGATTTATTACTCAGCTTCTGAGGGTACCACTGACAAAGGAGAAGTCCCCAATGGCTACAATGTCTCCAGATTAAACAAACGGGAGTTCTTGCTCAGGCTGGAGTCGGCTGCTCCCTCCCAGACATCTGTGTACTTCTGTGCCAGCAGCGCAG	NAGVTQTPKFQVLKTGQSMTLQCAQDMNHNSMYWYRQDPGMGLRLIYYSASEGTTDKGEVPNGYNVSRLNKREFLLRLESAAPSQTSVYFCASSA	AATGCTGGTGTCACTCAGACCCCAAAATTCCAGGTCCTGAAGACAGGACAGAGCATGACACTGCAGTGTGCCCAGGATATGAACCATAACTCCATGTACTGGTATCGACAAGACCCAGGCATGGGACTGAGGCTGATTTATTACTCAGCTTCTGAGGGTACCACTGACAAAGGAGAAGTCCCCAATGGCTACAATGTCTCCAGATTAAACAAACGGGAGTTCTCGCTCAGGCTGGAGTCGGCTGCTCCCTCCCAGACATCTGTGTACTTCTGTGCCAGCAGTGAAG	NAGVTQTPKFQVLKTGQSMTLQCAQDMNHNSMYWYRQDPGMGLRLIYYSASEGTTDKGEVPNGYNVSRLNKREFSLRLESAAPSQTSVYFCASSE	GGGAGGG	GG	GGGAGGG	GG	ACCGGGGAGCTGTTTTTTGGAGAAGGCTCTAGGCTGACCGTACTGG	TGELFFGEGSRLTVL	ACCGGGGAGCTGTTTTTTGGAGAAGGCTCTAGGCTGACCGTACTGG	TGELFFGEGSRLTVL	AATGCTGGTGTCACTCAGACCCCAAAATTCCAGGTCCTGAAGACAGGACAGAGCATGACACTGCAGTGTGCCCAGGAT	NAGVTQTPKFQVLKTGQSMTLQCAQD	ATGAACCATAACTCC	MNHNS	ATGTACTGGTATCGACAAGACCCAGGCATGGGACTGAGGCTGATTTATTAC	MYWYRQDPGMGLRLIYY	TCAGCTTCTGAGGGTACC	SASEGT
Pat_453	IW9	CTCACACCAAGTCATC	TCRbeta	tig00000001_CTCACACCAAGTCATC	1001	500	0.666667	GATTCTGGAGTCACACAAACCCCAAAGCACCTGATCACAGCAACTGGACAGCGAGTGACGCTGAGATGCTCCCCTAGGTCTGGAGACCTCTCTGTGTACTGGTACCAACAGAGCCTGGACCAGGGCCTCCAGTTCCTCATTCAGTATTATAATGGAGAAGAGAGAGCAAAAGGAAACATTCTTGAACGATTCTCCGCACAACAGTTCCCTGACTTGCACTCTGAACTAAACCTGAGCTCTCTGGAGCTGGGGGACTCAGCTTTGTATTTCTGTGCCAGCAGCGTAGGGGGGGACGACTATGGCTACACCTTCGGTTCGGGGACCAGGTTAACCGTTGTAG	DSGVTQTPKHLITATGQRVTLRCSPRSGDLSVYWYQQSLDQGLQFLIQYYNGEERAKGNILERFSAQQFPDLHSELNLSSLELGDSALYFCASSVGGDDYGYTFGSGTRLTVV	TRB	F	T	F	T	F	T	TRBV9*01	TRBD2*01	TRBJ1-2*01	GATTCTGGAGTCACACAAACCCCAAAGCACCTGATCACAGCAACTGGACAGCGAGTGACGCTGAGATGCTCCCCTAGGTCTGGAGACCTCTCTGTGTACTGGTACCAACAGAGCCTGGACCAGGGCCTCCAGTTCCTCATTCAGTATTATAATGGAGAAGAGAGAGCAAAAGGAAACATTCTTGAACGATTCTCCGCACAACAGTTCCCTGACTTGCACTCTGAACTAAACCTGAGCTCTCTGGAGCTGGGGGACTCAGCTTTGTATTTCTGTGCCAGCAGCGTAGGGGGGGACGACTATGGCTACACCTTCGGTTCGGGGACCAGGTTAACCGTTGTAG	GATTCTGGAGTCACACAAACCCCAAAGCACCTGATCACAGCAACTGGACAGCGAGTGACGCTGAGATGCTCCCCTAGGTCTGGAGACCTCTCTGTGTACTGGTACCAACAGAGCCTGGACCAGGGCCTCCAGTTCCTCATTCAGTATTATAATGGAGAAGAGAGAGCAAAAGGAAACATTCTTGAACGATTCTCCGCACAACAGTTCCCTGACTTGCACTCTGAACTAAACCTGAGCTCTCTGGAGCTGGGGGACTCAGCTTTGTATTTCTGTGCCAGCAGCGTAGGGGGGGNNNACTATGGCTACACCTTCGGTTCGGGGACCAGGTTAACCGTTGTAG	DSGVTQTPKHLITATGQRVTLRCSPRSGDLSVYWYQQSLDQGLQFLIQYYNGEERAKGNILERFSAQQFPDLHSELNLSSLELGDSALYFCASSVGGDDYGYTFGSGTRLTVV	DSGVTQTPKHLITATGQRVTLRCSPRSGDLSVYWYQQSLDQGLQFLIQYYNGEERAKGNILERFSAQQFPDLHSELNLSSLELGDSALYFCASSVGGXXYGYTFGSGTRLTVV	1	286	287	292	296	340	GATTCTGGAGTCACACAAACCCCAAAGCACCTGATCACAGCAACTGGACAGCGAGTGACGCTGAGATGCTCCCCTAGGTCTGGAGACCTCTCTGTGTACTGGTACCAACAGAGCCTGGACCAGGGCCTCCAGTTCCTCATTCAGTATTATAATGGAGAAGAGAGAGCAAAAGGAAACATTCTTGAACGATTCTCCGCACAACAGTTCCCTGACTTGCACTCTGAACTAAACCTGAGCTCTCTGGAGCTGGGGGACTCAGCTTTGTATTTCTGTGCCAGCAGCGTAG	DSGVTQTPKHLITATGQRVTLRCSPRSGDLSVYWYQQSLDQGLQFLIQYYNGEERAKGNILERFSAQQFPDLHSELNLSSLELGDSALYFCASSV	GATTCTGGAGTCACACAAACCCCAAAGCACCTGATCACAGCAACTGGACAGCGAGTGACGCTGAGATGCTCCCCTAGGTCTGGAGACCTCTCTGTGTACTGGTACCAACAGAGCCTGGACCAGGGCCTCCAGTTCCTCATTCAGTATTATAATGGAGAAGAGAGAGCAAAAGGAAACATTCTTGAACGATTCTCCGCACAACAGTTCCCTGACTTGCACTCTGAACTAAACCTGAGCTCTCTGGAGCTGGGGGACTCAGCTTTGTATTTCTGTGCCAGCAGCGTAG	DSGVTQTPKHLITATGQRVTLRCSPRSGDLSVYWYQQSLDQGLQFLIQYYNGEERAKGNILERFSAQQFPDLHSELNLSSLELGDSALYFCASSV	GGGGGG	G	GGGGGG	G	ACTATGGCTACACCTTCGGTTCGGGGACCAGGTTAACCGTTGTAG	YGYTFGSGTRLTVV	ACTATGGCTACACCTTCGGTTCGGGGACCAGGTTAACCGTTGTAG	YGYTFGSGTRLTVV	GATTCTGGAGTCACACAAACCCCAAAGCACCTGATCACAGCAACTGGACAGCGAGTGACGCTGAGATGCTCCCCTAGG	DSGVTQTPKHLITATGQRVTLRCSPR	TCTGGAGACCTCTCT	SGDLS	GTGTACTGGTACCAACAGAGCCTGGACCAGGGCCTCCAGTTCCTCATTCAG	VYWYQQSLDQGLQFLIQ	TATTATAATGGAGAAGAG	YYNGEE
Pat_453	KW11	GCAGTTATCACAGGCC	TCRbeta	tig00000010_GCAGTTATCACAGGCC	1140	501	1	GAACCTGAAGTCACCCAGACTCCCAGCCATCAGGTCACACAGATGGGACAGGAAGTGATCTTGCGCTGTGTCCCCATCTCTAATCACTTATACTTCTATTGGTACAGACAAATCTTGGGGCAGAAAGTCGAGTTTCTGGTTTCCTTTTATAATAATGAAATCTCAGAGAAGTCTGAAATATTCGATGATCAATTCTCAGTTGAAAGGCCTGATGGATCAAATTTCACTCTGAAGATCCGGTCCACAAAGCTGGAGGACTCAGCCATGTACTTCTGTGCCAGCAGTGAAGAACAGGGGGTCCATGGCTACACCTTCGGTTCGGGGACCAGGTTAACCGTTGTAG	EPEVTQTPSHQVTQMGQEVILRCVPISNHLYFYWYRQILGQKVEFLVSFYNNEISEKSEIFDDQFSVERPDGSNFTLKIRSTKLEDSAMYFCASSEEQGVHGYTFGSGTRLTVV	TRB	F	T	F	T	F	T	TRBV2*01	TRBD1*01	TRBJ1-2*01	GAACCTGAAGTCACCCAGACTCCCAGCCATCAGGTCACACAGATGGGACAGGAAGTGATCTTGCGCTGTGTCCCCATCTCTAATCACTTATACTTCTATTGGTACAGACAAATCTTGGGGCAGAAAGTCGAGTTTCTGGTTTCCTTTTATAATAATGAAATCTCAGAGAAGTCTGAAATATTCGATGATCAATTCTCAGTTGAAAGGCCTGATGGATCAAATTTCACTCTGAAGATCCGGTCCACAAAGCTGGAGGACTCAGCCATGTACTTCTGTGCCAGCAGTGAAGAACAGGGGGTCCATGGCTACACCTTCGGTTCGGGGACCAGGTTAACCGTTGTAG	GAACCTGAAGTCACCCAGACTCCCAGCCATCAGGTCACACAGATGGGACAGGAAGTGATCTTGCGCTGTGTCCCCATCTCTAATCACTTATACTTCTATTGGTACAGACAAATCTTGGGGCAGAAAGTCGAGTTTCTGGTTTCCTTTTATAATAATGAAATCTCAGAGAAGTCTGAAATATTCGATGATCAATTCTCAGTTGAAAGGCCTGATGGATCAAATTTCACTCTGAAGATCCGGTCCACAAAGCTGGAGGACTCAGCCATGTACTTCTGTGCCAGCAGTGAAGNACAGGGGGNNNATGGCTACACCTTCGGTTCGGGGACCAGGTTAACCGTTGTAG	EPEVTQTPSHQVTQMGQEVILRCVPISNHLYFYWYRQILGQKVEFLVSFYNNEISEKSEIFDDQFSVERPDGSNFTLKIRSTKLEDSAMYFCASSEEQGVHGYTFGSGTRLTVV	EPEVTQTPSHQVTQMGQEVILRCVPISNHLYFYWYRQILGQKVEFLVSFYNNEISEKSEIFDDQFSVERPDGSNFTLKIRSTKLEDSAMYFCASSEXQGXXGYTFGSGTRLTVV	1	289	291	298	302	343	GAACCTGAAGTCACCCAGACTCCCAGCCATCAGGTCACACAGATGGGACAGGAAGTGATCTTGCGCTGTGTCCCCATCTCTAATCACTTATACTTCTATTGGTACAGACAAATCTTGGGGCAGAAAGTCGAGTTTCTGGTTTCCTTTTATAATAATGAAATCTCAGAGAAGTCTGAAATATTCGATGATCAATTCTCAGTTGAAAGGCCTGATGGATCAAATTTCACTCTGAAGATCCGGTCCACAAAGCTGGAGGACTCAGCCATGTACTTCTGTGCCAGCAGTGAAG	EPEVTQTPSHQVTQMGQEVILRCVPISNHLYFYWYRQILGQKVEFLVSFYNNEISEKSEIFDDQFSVERPDGSNFTLKIRSTKLEDSAMYFCASSE	GAACCTGAAGTCACCCAGACTCCCAGCCATCAGGTCACACAGATGGGACAGGAAGTGATCTTGCGCTGTGTCCCCATCTCTAATCACTTATACTTCTATTGGTACAGACAAATCTTGGGGCAGAAAGTCGAGTTTCTGGTTTCCTTTTATAATAATGAAATCTCAGAGAAGTCTGAAATATTCGATGATCAATTCTCAGTTGAAAGGCCTGATGGATCAAATTTCACTCTGAAGATCCGGTCCACAAAGCTGGAGGACTCAGCCATGTACTTCTGTGCCAGCAGTGAAG	EPEVTQTPSHQVTQMGQEVILRCVPISNHLYFYWYRQILGQKVEFLVSFYNNEISEKSEIFDDQFSVERPDGSNFTLKIRSTKLEDSAMYFCASSE	ACAGGGGG	QG	ACAGGGGG	QG	ATGGCTACACCTTCGGTTCGGGGACCAGGTTAACCGTTGTAG	GYTFGSGTRLTVV	ATGGCTACACCTTCGGTTCGGGGACCAGGTTAACCGTTGTAG	GYTFGSGTRLTVV	GAACCTGAAGTCACCCAGACTCCCAGCCATCAGGTCACACAGATGGGACAGGAAGTGATCTTGCGCTGTGTCCCCATC	EPEVTQTPSHQVTQMGQEVILRCVPI	TCTAATCACTTATAC	SNHLY	TTCTATTGGTACAGACAAATCTTGGGGCAGAAAGTCGAGTTTCTGGTTTCC	FYWYRQILGQKVEFLVS	TTTTATAATAATGAAATC	FYNNEI
Pat_453	KW11	GCATGTAAGTAGCGGT	TCRbeta	tig00000005_GCATGTAAGTAGCGGT	957	500	1	GACACTGAAGTTACCCAGACACCAAAACACCTGGTCATGGGAATGACAAATAAGAAGTCTTTGAAATGTGAACAACATATGGGGCACAGGGCTATGTATTGGTACAAGCAGAAAGCTAAGAAGCCACCGGAGCTCATGTTTGTCTACAGCTATGAGAAACTCTCTATAAATGAAAGTGTGCCAAGTCGCTTCTCACCTGAATGCCCCAACAGCTCTCTCTTAAACCTTCACCTACACGCCCTGCAGCCAGAAGACTCAGCCCTGTATCTCTGCGCCAGCAGTAACGGGATATCGAGTAACTATGGCTACACCTTCGGTTCGGGGACCAGGTTAACCGTTGTAG	DTEVTQTPKHLVMGMTNKKSLKCEQHMGHRAMYWYKQKAKKPPELMFVYSYEKLSINESVPSRFSPECPNSSLLNLHLHALQPEDSALYLCASSNGISSNYGYTFGSGTRLTVV	TRB	F	T	F	T	F	T	TRBV4-1*01	TRBD2*02	TRBJ1-2*01	GACACTGAAGTTACCCAGACACCAAAACACCTGGTCATGGGAATGACAAATAAGAAGTCTTTGAAATGTGAACAACATATGGGGCACAGGGCTATGTATTGGTACAAGCAGAAAGCTAAGAAGCCACCGGAGCTCATGTTTGTCTACAGCTATGAGAAACTCTCTATAAATGAAAGTGTGCCAAGTCGCTTCTCACCTGAATGCCCCAACAGCTCTCTCTTAAACCTTCACCTACACGCCCTGCAGCCAGAAGACTCAGCCCTGTATCTCTGCGCCAGCAGTAACGGGATATCGAGTAACTATGGCTACACCTTCGGTTCGGGGACCAGGTTAACCGTTGTAG	GACACTGAAGTTACCCAGACACCAAAACACCTGGTCATGGGAATGACAAATAAGAAGTCTTTGAAATGTGAACAACATATGGGGCACAGGGCTATGTATTGGTACAAGCAGAAAGCTAAGAAGCCACCGGAGCTCATGTTTGTCTACAGCTATGAGAAACTCTCTATAAATGAAAGTGTGCCAAGTCGCTTCTCACCTGAATGCCCCAACAGCTCTCTCTTAAACCTTCACCTACACGCCCTGCAGCCAGAAGACTCAGCCCTGTATCTCTGCGCCAGCAGNNNCGGGANNNNNNNTAACTATGGCTACACCTTCGGTTCGGGGACCAGGTTAACCGTTGTAG	DTEVTQTPKHLVMGMTNKKSLKCEQHMGHRAMYWYKQKAKKPPELMFVYSYEKLSINESVPSRFSPECPNSSLLNLHLHALQPEDSALYLCASSNGISSNYGYTFGSGTRLTVV	DTEVTQTPKHLVMGMTNKKSLKCEQHMGHRAMYWYKQKAKKPPELMFVYSYEKLSINESVPSRFSPECPNSSLLNLHLHALQPEDSALYLCASXXGXXXNYGYTFGSGTRLTVV	1	281	285	289	297	343	GACACTGAAGTTACCCAGACACCAAAACACCTGGTCATGGGAATGACAAATAAGAAGTCTTTGAAATGTGAACAACATATGGGGCACAGGGCTATGTATTGGTACAAGCAGAAAGCTAAGAAGCCACCGGAGCTCATGTTTGTCTACAGCTATGAGAAACTCTCTATAAATGAAAGTGTGCCAAGTCGCTTCTCACCTGAATGCCCCAACAGCTCTCTCTTAAACCTTCACCTACACGCCCTGCAGCCAGAAGACTCAGCCCTGTATCTCTGCGCCAGCAG	DTEVTQTPKHLVMGMTNKKSLKCEQHMGHRAMYWYKQKAKKPPELMFVYSYEKLSINESVPSRFSPECPNSSLLNLHLHALQPEDSALYLCAS	GACACTGAAGTTACCCAGACACCAAAACACCTGGTCATGGGAATGACAAATAAGAAGTCTTTGAAATGTGAACAACATATGGGGCACAGGGCTATGTATTGGTACAAGCAGAAAGCTAAGAAGCCACCGGAGCTCATGTTTGTCTACAGCTATGAGAAACTCTCTATAAATGAAAGTGTGCCAAGTCGCTTCTCACCTGAATGCCCCAACAGCTCTCTCTTAAACCTTCACCTACACGCCCTGCAGCCAGAAGACTCAGCCCTGTATCTCTGCGCCAGCAG	DTEVTQTPKHLVMGMTNKKSLKCEQHMGHRAMYWYKQKAKKPPELMFVYSYEKLSINESVPSRFSPECPNSSLLNLHLHALQPEDSALYLCAS	CGGGA	G	CGGGA	G	TAACTATGGCTACACCTTCGGTTCGGGGACCAGGTTAACCGTTGTAG	NYGYTFGSGTRLTVV	TAACTATGGCTACACCTTCGGTTCGGGGACCAGGTTAACCGTTGTAG	NYGYTFGSGTRLTVV	GACACTGAAGTTACCCAGACACCAAAACACCTGGTCATGGGAATGACAAATAAGAAGTCTTTGAAATGTGAACAACAT	DTEVTQTPKHLVMGMTNKKSLKCEQH	ATGGGGCACAGGGCT	MGHRA	ATGTATTGGTACAAGCAGAAAGCTAAGAAGCCACCGGAGCTCATGTTTGTC	MYWYKQKAKKPPELMFV	TACAGCTATGAGAAACTC	YSYEKL
Pat_453	KW11	GCGAGAAGTCATGCAT	TCRbeta	tig00000005_GCGAGAAGTCATGCAT	1070	286	1	AATGCTGGTGTCACTCAGACCCCAAAATTCCAGGTCCTGAAGACAGGACAGAGCATGACACTGCAGTGTGCCCAGGATATGAACCATGAATACATGTCCTGGTATCGACAAGACCCAGGCATGGGGCTGAGGCTGATTCATTACTCAGTTGGTGCTGGTATCACTGACCAAGGAGAAGTCCCCAATGGCTACAATGTCTCCAGATCAACCACAGAGGATTTCCCGCTCAGGCTGCTGTCGGCTGCTCCCTCCCAGACATCTGTGTACTTCTGTGCCAGCAGTTACCGGGGGGCGTACGAGCAGTACTTCGGGCCGGGCACCAGGCTCACGGTCACAG	NAGVTQTPKFQVLKTGQSMTLQCAQDMNHEYMSWYRQDPGMGLRLIHYSVGAGITDQGEVPNGYNVSRSTTEDFPLRLLSAAPSQTSVYFCASSYRGAYEQYFGPGTRLTVT	TRB	F	T	F	T	F	T	TRBV6-5*01	TRBD2*01	TRBJ2-7*01	AATGCTGGTGTCACTCAGACCCCAAAATTCCAGGTCCTGAAGACAGGACAGAGCATGACACTGCAGTGTGCCCAGGATATGAACCATGAATACATGTCCTGGTATCGACAAGACCCAGGCATGGGGCTGAGGCTGATTCATTACTCAGTTGGTGCTGGTATCACTGACCAAGGAGAAGTCCCCAATGGCTACAATGTCTCCAGATCAACCACAGAGGATTTCCCGCTCAGGCTGCTGTCGGCTGCTCCCTCCCAGACATCTGTGTACTTCTGTGCCAGCAGTTACCGGGGGGCGTACGAGCAGTACTTCGGGCCGGGCACCAGGCTCACGGTCACAG	AATGCTGGTGTCACTCAGACCCCAAAATTCCAGGTCCTGAAGACAGGACAGAGCATGACACTGCAGTGTGCCCAGGATATGAACCATGAATACATGTCCTGGTATCGACAAGACCCAGGCATGGGGCTGAGGCTGATTCATTACTCAGTTGGTGCTGGTATCACTGACCAAGGAGAAGTCCCCAATGGCTACAATGTCTCCAGATCAACCACAGAGGATTTCCCGCTCAGGCTGCTGTCGGCTGCTCCCTCCCAGACATCTGTGTACTTCTGTGCCAGCAGTTACCGGGGGGNNTACGAGCAGTACTTCGGGCCGGGCACCAGGCTCACGGTCACAG	NAGVTQTPKFQVLKTGQSMTLQCAQDMNHEYMSWYRQDPGMGLRLIHYSVGAGITDQGEVPNGYNVSRSTTEDFPLRLLSAAPSQTSVYFCASSYRGAYEQYFGPGTRLTVT	NAGVTQTPKFQVLKTGQSMTLQCAQDMNHEYMSWYRQDPGMGLRLIHYSVGAGITDQGEVPNGYNVSRSTTEDFPLRLLSAAPSQTSVYFCASSYRGXYEQYFGPGTRLTVT	1	285	286	292	295	337	AATGCTGGTGTCACTCAGACCCCAAAATTCCAGGTCCTGAAGACAGGACAGAGCATGACACTGCAGTGTGCCCAGGATATGAACCATGAATACATGTCCTGGTATCGACAAGACCCAGGCATGGGGCTGAGGCTGATTCATTACTCAGTTGGTGCTGGTATCACTGACCAAGGAGAAGTCCCCAATGGCTACAATGTCTCCAGATCAACCACAGAGGATTTCCCGCTCAGGCTGCTGTCGGCTGCTCCCTCCCAGACATCTGTGTACTTCTGTGCCAGCAGTTAC	NAGVTQTPKFQVLKTGQSMTLQCAQDMNHEYMSWYRQDPGMGLRLIHYSVGAGITDQGEVPNGYNVSRSTTEDFPLRLLSAAPSQTSVYFCASSY	AATGCTGGTGTCACTCAGACCCCAAAATTCCAGGTCCTGAAGACAGGACAGAGCATGACACTGCAGTGTGCCCAGGATATGAACCATGAATACATGTCCTGGTATCGACAAGACCCAGGCATGGGGCTGAGGCTGATTCATTACTCAGTTGGTGCTGGTATCACTGACCAAGGAGAAGTCCCCAATGGCTACAATGTCTCCAGATCAACCACAGAGGATTTCCCGCTCAGGCTGCTGTCGGCTGCTCCCTCCCAGACATCTGTGTACTTCTGTGCCAGCAGTTAC	NAGVTQTPKFQVLKTGQSMTLQCAQDMNHEYMSWYRQDPGMGLRLIHYSVGAGITDQGEVPNGYNVSRSTTEDFPLRLLSAAPSQTSVYFCASSY	CGGGGGG	RG	CGGGGGG	RG	TACGAGCAGTACTTCGGGCCGGGCACCAGGCTCACGGTCACAG	YEQYFGPGTRLTVT	TACGAGCAGTACTTCGGGCCGGGCACCAGGCTCACGGTCACAG	YEQYFGPGTRLTVT	AATGCTGGTGTCACTCAGACCCCAAAATTCCAGGTCCTGAAGACAGGACAGAGCATGACACTGCAGTGTGCCCAGGAT	NAGVTQTPKFQVLKTGQSMTLQCAQD	ATGAACCATGAATAC	MNHEY	ATGTCCTGGTATCGACAAGACCCAGGCATGGGGCTGAGGCTGATTCATTAC	MSWYRQDPGMGLRLIHY	TCAGTTGGTGCTGGTATC	SVGAGI
Pat_453	IW9	GGCCGATAGATATGCA	TCRbeta	tig00000002_GGCCGATAGATATGCA	1043	12	1	GATGCTGGAATCACCCAGAGCCCAAGATACAAGATCACAGAGACAGGAAGGCAGGTGACCTTGATGTGTCACCAGACTTGGAGCCACAGCTATATGTTCTGGTATCGACAAGACCTGGGACATGGGCTGAGGCTGATCTATTACTCAGCAGCTGCTGATATTACAGATAAAGGAGAAGTCCCCGATGGCTATGTTGTCTCCAGATCCAAGACAGAGAATTTCCCCCTCACTCTGGAGTCAGCTACCCGCTCCCAGACATCTGTGTATTTCTGCGCCAGCAGTGAGTCTTTAAACGGGGGGGGGCCATACAATGAGCAGTTCTTCGGGCCAGGGACACGGCTCACCGTGCTAG	DAGITQSPRYKITETGRQVTLMCHQTWSHSYMFWYRQDLGHGLRLIYYSAAADITDKGEVPDGYVVSRSKTENFPLTLESATRSQTSVYFCASSESLNGGGPYNEQFFGPGTRLTVL	TRB	F	T	F	T	F	T	TRBV10-2*01	TRBD2*01	TRBJ2-1*01	GATGCTGGAATCACCCAGAGCCCAAGATACAAGATCACAGAGACAGGAAGGCAGGTGACCTTGATGTGTCACCAGACTTGGAGCCACAGCTATATGTTCTGGTATCGACAAGACCTGGGACATGGGCTGAGGCTGATCTATTACTCAGCAGCTGCTGATATTACAGATAAAGGAGAAGTCCCCGATGGCTATGTTGTCTCCAGATCCAAGACAGAGAATTTCCCCCTCACTCTGGAGTCAGCTACCCGCTCCCAGACATCTGTGTATTTCTGCGCCAGCAGTGAGTCTTTAAACGGGGGGGGGCCATACAATGAGCAGTTCTTCGGGCCAGGGACACGGCTCACCGTGCTAG	GATGCTGGAATCACCCAGAGCCCAAGATACAAGATCACAGAGACAGGAAGGCAGGTGACCTTGATGTGTCACCAGACTTGGAGCCACAGCTATATGTTCTGGTATCGACAAGACCTGGGACATGGGCTGAGGCTGATCTATTACTCAGCAGCTGCTGATATTACAGATAAAGGAGAAGTCCCCGATGGCTATGTTGTCTCCAGATCCAAGACAGAGAATTTCCCCCTCACTCTGGAGTCAGCTACCCGCTCCCAGACATCTGTGTATTTCTGCGCCAGCAGTGAGTCNNNNNNCGGGGGGGNNNNNTACAATGAGCAGTTCTTCGGGCCAGGGACACGGCTCACCGTGCTAG	DAGITQSPRYKITETGRQVTLMCHQTWSHSYMFWYRQDLGHGLRLIYYSAAADITDKGEVPDGYVVSRSKTENFPLTLESATRSQTSVYFCASSESLNGGGPYNEQFFGPGTRLTVL	DAGITQSPRYKITETGRQVTLMCHQTWSHSYMFWYRQDLGHGLRLIYYSAAADITDKGEVPDGYVVSRSKTENFPLTLESATRSQTSVYFCASSESXXGGXXYNEQFFGPGTRLTVL	1	287	294	301	307	352	GATGCTGGAATCACCCAGAGCCCAAGATACAAGATCACAGAGACAGGAAGGCAGGTGACCTTGATGTGTCACCAGACTTGGAGCCACAGCTATATGTTCTGGTATCGACAAGACCTGGGACATGGGCTGAGGCTGATCTATTACTCAGCAGCTGCTGATATTACAGATAAAGGAGAAGTCCCCGATGGCTATGTTGTCTCCAGATCCAAGACAGAGAATTTCCCCCTCACTCTGGAGTCAGCTACCCGCTCCCAGACATCTGTGTATTTCTGCGCCAGCAGTGAGTC	DAGITQSPRYKITETGRQVTLMCHQTWSHSYMFWYRQDLGHGLRLIYYSAAADITDKGEVPDGYVVSRSKTENFPLTLESATRSQTSVYFCASSES	GATGCTGGAATCACCCAGAGCCCAAGATACAAGATCACAGAGACAGGAAGGCAGGTGACCTTGATGTGTCACCAGACTTGGAGCCACAGCTATATGTTCTGGTATCGACAAGACCTGGGACATGGGCTGAGGCTGATCTATTACTCAGCAGCTGCTGATATTACAGATAAAGGAGAAGTCCCCGATGGCTATGTTGTCTCCAGATCCAAGACAGAGAATTTCCCCCTCACTCTGGAGTCAGCTACCCGCTCCCAGACATCTGTGTATTTCTGCGCCAGCAGTGAGTC	DAGITQSPRYKITETGRQVTLMCHQTWSHSYMFWYRQDLGHGLRLIYYSAAADITDKGEVPDGYVVSRSKTENFPLTLESATRSQTSVYFCASSES	CGGGGGGG	GG	CGGGGGGG	GG	TACAATGAGCAGTTCTTCGGGCCAGGGACACGGCTCACCGTGCTAG	YNEQFFGPGTRLTVL	TACAATGAGCAGTTCTTCGGGCCAGGGACACGGCTCACCGTGCTAG	YNEQFFGPGTRLTVL	GATGCTGGAATCACCCAGAGCCCAAGATACAAGATCACAGAGACAGGAAGGCAGGTGACCTTGATGTGTCACCAGACT	DAGITQSPRYKITETGRQVTLMCHQT	TGGAGCCACAGCTAT	WSHSY	ATGTTCTGGTATCGACAAGACCTGGGACATGGGCTGAGGCTGATCTATTAC	MFWYRQDLGHGLRLIYY	TCAGCAGCTGCTGATATT	SAAADI
Pat_453	KW11	GGCTCGAAGATCTGAA	TCRbeta	tig00000005_GGCTCGAAGATCTGAA	1156	498	1	GGAGCTGGAGTCTCCCAGTCCCCCAGTAACAAGGTCACAGAGAAGGGAAAGGATGTAGAGCTCAGGTGTGATCCAATTTCAGGTCATACTGCCCTTTACTGGTACCGACAGAGGCTGGGGCAGGGCCTGGAGTTTTTAATTTACTTCCAAGGCAACAGTGCACCAGACAAATCAGGGCTGCCCAGTGATCGCTTCTCTGCAGAGAGGACTGGGGAATCCGTCTCCACTCTGACGATCCAGCGCACACAGCAGGAGGACTCGGCCGTGTATCTCTGTGCCAGCAGCTTTGCCGGGACAACAAAGAACATTCAGTACTTCGGCGCCGGGACCCGGCTCTCAGTGCTGG	GAGVSQSPSNKVTEKGKDVELRCDPISGHTALYWYRQRLGQGLEFLIYFQGNSAPDKSGLPSDRFSAERTGESVSTLTIQRTQQEDSAVYLCASSFAGTTKNIQYFGAGTRLSVL	TRB	F	T	F	T	F	T	TRBV7-2*02	TRBD1*01	TRBJ2-4*01	GGAGCTGGAGTCTCCCAGTCCCCCAGTAACAAGGTCACAGAGAAGGGAAAGGATGTAGAGCTCAGGTGTGATCCAATTTCAGGTCATACTGCCCTTTACTGGTACCGACAGAGGCTGGGGCAGGGCCTGGAGTTTTTAATTTACTTCCAAGGCAACAGTGCACCAGACAAATCAGGGCTGCCCAGTGATCGCTTCTCTGCAGAGAGGACTGGGGAATCCGTCTCCACTCTGACGATCCAGCGCACACAGCAGGAGGACTCGGCCGTGTATCTCTGTGCCAGCAGCTTTGCCGGGACAACAAAGAACATTCAGTACTTCGGCGCCGGGACCCGGCTCTCAGTGCTGG	GGAGCTGGAGTCTCCCAGTCCCCCAGTAACAAGGTCACAGAGAAGGGAAAGGATGTAGAGCTCAGGTGTGATCCAATTTCAGGTCATACTGCCCTTTACTGGTACCGACAGAGGCTGGGGCAGGGCCTGGAGTTTTTAATTTACTTCCAAGGCAACAGTGCACCAGACAAATCAGGGCTGCCCAGTGATCGCTTCTCTGCAGAGAGGACTGGGGAATCCGTCTCCACTCTGACGATCCAGCGCACACAGCAGGAGGACTCGGCCGTGTATCTCTGTGCCAGCAGCTTAGCNGGGACANNNNNNAACATTCAGTACTTCGGCGCCGGGACCCGGCTCTCAGTGCTGG	GAGVSQSPSNKVTEKGKDVELRCDPISGHTALYWYRQRLGQGLEFLIYFQGNSAPDKSGLPSDRFSAERTGESVSTLTIQRTQQEDSAVYLCASSFAGTTKNIQYFGAGTRLSVL	GAGVSQSPSNKVTEKGKDVELRCDPISGHTALYWYRQRLGQGLEFLIYFQGNSAPDKSGLPSDRFSAERTGESVSTLTIQRTQQEDSAVYLCASSLAGTXXNIQYFGAGTRLSVL	1	290	292	297	304	346	GGAGCTGGAGTCTCCCAGTCCCCCAGTAACAAGGTCACAGAGAAGGGAAAGGATGTAGAGCTCAGGTGTGATCCAATTTCAGGTCATACTGCCCTTTACTGGTACCGACAGAGGCTGGGGCAGGGCCTGGAGTTTTTAATTTACTTCCAAGGCAACAGTGCACCAGACAAATCAGGGCTGCCCAGTGATCGCTTCTCTGCAGAGAGGACTGGGGAATCCGTCTCCACTCTGACGATCCAGCGCACACAGCAGGAGGACTCGGCCGTGTATCTCTGTGCCAGCAGCTTTGC	GAGVSQSPSNKVTEKGKDVELRCDPISGHTALYWYRQRLGQGLEFLIYFQGNSAPDKSGLPSDRFSAERTGESVSTLTIQRTQQEDSAVYLCASSFA	GGAGCTGGAGTCTCCCAGTCCCCCAGTAACAAGGTCACAGAGAAGGGAAAGGATGTAGAGCTCAGGTGTGATCCAATTTCAGGTCATACTGCCCTTTACTGGTACCGACAGAGGCTGGGGCAGGGCCTGGAGTTTTTAATTTACTTCCAAGGCAACAGTGCACCAGACAAATCAGGGCTGCCCAGTGATCGCTTCTCTGCAGAGAGGACTGGGGAATCCGTCTCCACTCTGACGATCCAGCGCACACAGCAGGAGGACTCGGCCGTGTATCTCTGTGCCAGCAGCTTAGC	GAGVSQSPSNKVTEKGKDVELRCDPISGHTALYWYRQRLGQGLEFLIYFQGNSAPDKSGLPSDRFSAERTGESVSTLTIQRTQQEDSAVYLCASSLA	GGGACA	GT	GGGACA	GT	AACATTCAGTACTTCGGCGCCGGGACCCGGCTCTCAGTGCTGG	NIQYFGAGTRLSVL	AACATTCAGTACTTCGGCGCCGGGACCCGGCTCTCAGTGCTGG	NIQYFGAGTRLSVL	GGAGCTGGAGTCTCCCAGTCCCCCAGTAACAAGGTCACAGAGAAGGGAAAGGATGTAGAGCTCAGGTGTGATCCAATT	GAGVSQSPSNKVTEKGKDVELRCDPI	TCAGGTCATACTGCC	SGHTA	CTTTACTGGTACCGACAGAGGCTGGGGCAGGGCCTGGAGTTTTTAATTTAC	LYWYRQRLGQGLEFLIY	TTCCAAGGCAACAGTGCA	FQGNSA
Pat_453	KW11	GTCACAAGTACTTAGC	TCRbeta	tig00000002_GTCACAAGTACTTAGC	1602	501	1	GATACTGGAGTCTCCCAGGACCCCAGACACAAGATCACAAAGAGGGGACAGAATGTAACTTTCAGGTGTGATCCAATTTCTGAACACAGCCGCCTTTATTGGTACCGACAGACCCTGGGGCAGGGCCCAGAGTTTCTGACTTACTTCCAGAATGAAGCTCAACTAGAAAAATCAAGGCTGCTCAGTGATCGGTTCTCTGCAGAGAGGCCTAAGGGATCTTTCTCCACCTTGGAGATCCAGCGCACAGAGCAGGGGGACTCGGCCATGTATCTCTGTGCCAGCAGCCCGGGCGTTAAATTAGCGGGGGACCGCTCCTACAATGAGCAGTTCTTCGGGCCAGGGACACGGCTCACCGTGCTAG	DTGVSQDPRHKITKRGQNVTFRCDPISEHSRLYWYRQTLGQGPEFLTYFQNEAQLEKSRLLSDRFSAERPKGSFSTLEIQRTEQGDSAMYLCASSPGVKLAGDRSYNEQFFGPGTRLTVL	TRB	F	T	F	T	F	T	TRBV7-9*03	TRBD2*01	TRBJ2-1*01	GATACTGGAGTCTCCCAGGACCCCAGACACAAGATCACAAAGAGGGGACAGAATGTAACTTTCAGGTGTGATCCAATTTCTGAACACAGCCGCCTTTATTGGTACCGACAGACCCTGGGGCAGGGCCCAGAGTTTCTGACTTACTTCCAGAATGAAGCTCAACTAGAAAAATCAAGGCTGCTCAGTGATCGGTTCTCTGCAGAGAGGCCTAAGGGATCTTTCTCCACCTTGGAGATCCAGCGCACAGAGCAGGGGGACTCGGCCATGTATCTCTGTGCCAGCAGCCCGGGCGTTAAATTAGCGGGGGACCGCTCCTACAATGAGCAGTTCTTCGGGCCAGGGACACGGCTCACCGTGCTAG	GATACTGGAGTCTCCCAGGACCCCAGACACAAGATCACAAAGAGGGGACAGAATGTAACTTTCAGGTGTGATCCAATTTCTGAACACAACCGCCTTTATTGGTACCGACAGACCCTGGGGCAGGGCCCAGAGTTTCTGACTTACTTCCAGAATGAAGCTCAACTAGAAAAATCAAGGCTGCTCAGTGATCGGTTCTCTGCAGAGAGGCCTAAGGGATCTTTCTCCACCTTGGAGATCCAGCGCACAGAGCAGGGGGACTCGGCCATGTATCTCTGTGCCAGCAGCNNNNNNNNNNNNNTAGCGGGGGNNNNCTCCTACAATGAGCAGTTCTTCGGGCCAGGGACACGGCTCACCGTGCTAG	DTGVSQDPRHKITKRGQNVTFRCDPISEHSRLYWYRQTLGQGPEFLTYFQNEAQLEKSRLLSDRFSAERPKGSFSTLEIQRTEQGDSAMYLCASSPGVKLAGDRSYNEQFFGPGTRLTVL	DTGVSQDPRHKITKRGQNVTFRCDPISEHNRLYWYRQTLGQGPEFLTYFQNEAQLEKSRLLSDRFSAERPKGSFSTLEIQRTEQGDSAMYLCASSXXXXXAGXXSYNEQFFGPGTRLTVL	1	285	299	307	312	361	GATACTGGAGTCTCCCAGGACCCCAGACACAAGATCACAAAGAGGGGACAGAATGTAACTTTCAGGTGTGATCCAATTTCTGAACACAGCCGCCTTTATTGGTACCGACAGACCCTGGGGCAGGGCCCAGAGTTTCTGACTTACTTCCAGAATGAAGCTCAACTAGAAAAATCAAGGCTGCTCAGTGATCGGTTCTCTGCAGAGAGGCCTAAGGGATCTTTCTCCACCTTGGAGATCCAGCGCACAGAGCAGGGGGACTCGGCCATGTATCTCTGTGCCAGCAGC	DTGVSQDPRHKITKRGQNVTFRCDPISEHSRLYWYRQTLGQGPEFLTYFQNEAQLEKSRLLSDRFSAERPKGSFSTLEIQRTEQGDSAMYLCASS	GATACTGGAGTCTCCCAGGACCCCAGACACAAGATCACAAAGAGGGGACAGAATGTAACTTTCAGGTGTGATCCAATTTCTGAACACAACCGCCTTTATTGGTACCGACAGACCCTGGGGCAGGGCCCAGAGTTTCTGACTTACTTCCAGAATGAAGCTCAACTAGAAAAATCAAGGCTGCTCAGTGATCGGTTCTCTGCAGAGAGGCCTAAGGGATCTTTCTCCACCTTGGAGATCCAGCGCACAGAGCAGGGGGACTCGGCCATGTATCTCTGTGCCAGCAGC	DTGVSQDPRHKITKRGQNVTFRCDPISEHNRLYWYRQTLGQGPEFLTYFQNEAQLEKSRLLSDRFSAERPKGSFSTLEIQRTEQGDSAMYLCASS	TAGCGGGGG	AG	TAGCGGGGG	AG	CTCCTACAATGAGCAGTTCTTCGGGCCAGGGACACGGCTCACCGTGCTAG	SYNEQFFGPGTRLTVL	CTCCTACAATGAGCAGTTCTTCGGGCCAGGGACACGGCTCACCGTGCTAG	SYNEQFFGPGTRLTVL	GATACTGGAGTCTCCCAGGACCCCAGACACAAGATCACAAAGAGGGGACAGAATGTAACTTTCAGGTGTGATCCAATT	DTGVSQDPRHKITKRGQNVTFRCDPI	TCTGAACACAGCCGC	SEHSR	CTTTATTGGTACCGACAGACCCTGGGGCAGGGCCCAGAGTTTCTGACTTAC	LYWYRQTLGQGPEFLTY	TTCCAGAATGAAGCTCAA	FQNEAQ
Pat_453	KW11	GTGCTTCAGCGCTTAT	TCRbeta	tig00000002_GTGCTTCAGCGCTTAT	1021	501	1	AATGCTGGTGTCACTCAGACCCCAAAATTCCACATCCTGAAGATAGGACAGAGCATGACACTGCAGTGTACCCAGGATATGAACCATAACTACATGTACTGGTATCGACAAGACCCAGGCATGGGGCTGAAGCTGATTTATTATTCAGTTGGTGCTGGTATCACTGATAAAGGAGAAGTCCCGAATGGCTACAACGTCTCCAGATCAACCACAGAGGATTTCCCGCTCAGGCTGGAGTTGGCTGCTCCCTCCCAGACATCTGTGTACTTCTGTGCCAGCCGACTAGCGGGGGCCGGGGCTTACAATGAGCAGTTCTTCGGGCCAGGGACACGGCTCACCGTGCTAG	NAGVTQTPKFHILKIGQSMTLQCTQDMNHNYMYWYRQDPGMGLKLIYYSVGAGITDKGEVPNGYNVSRSTTEDFPLRLELAAPSQTSVYFCASRLAGAGAYNEQFFGPGTRLTVL	TRB	F	T	F	T	F	T	TRBV6-6*01	TRBD2*01	TRBJ2-1*01	AATGCTGGTGTCACTCAGACCCCAAAATTCCACATCCTGAAGATAGGACAGAGCATGACACTGCAGTGTACCCAGGATATGAACCATAACTACATGTACTGGTATCGACAAGACCCAGGCATGGGGCTGAAGCTGATTTATTATTCAGTTGGTGCTGGTATCACTGATAAAGGAGAAGTCCCGAATGGCTACAACGTCTCCAGATCAACCACAGAGGATTTCCCGCTCAGGCTGGAGTTGGCTGCTCCCTCCCAGACATCTGTGTACTTCTGTGCCAGCCGACTAGCGGGGGCCGGGGCTTACAATGAGCAGTTCTTCGGGCCAGGGACACGGCTCACCGTGCTAG	AATGCTGGTGTCACTCAGACCCCAAAATTCCGCATCCTGAAGATAGGACAGAGCATGACACTGCAGTGTACCCAGGATATGAACCATAACTACATGTACTGGTATCGACAAGACCCAGGCATGGGGCTGAAGCTGATTTATTATTCAGTTGGTGCTGGTATCACTGATAAAGGAGAAGTCCCGAATGGCTACAACGTCTCCAGATCAACCACAGAGGATTTCCCGCTCAGGCTGGAGTTGGCTGCTCCCTCCCAGACATCTGTGTACTTCTGTGCCAGCNGACTAGCGGGGGNNNNNNNNTACAATGAGCAGTTCTTCGGGCCAGGGACACGGCTCACCGTGCTAG	NAGVTQTPKFHILKIGQSMTLQCTQDMNHNYMYWYRQDPGMGLKLIYYSVGAGITDKGEVPNGYNVSRSTTEDFPLRLELAAPSQTSVYFCASRLAGAGAYNEQFFGPGTRLTVL	NAGVTQTPKFRILKIGQSMTLQCTQDMNHNYMYWYRQDPGMGLKLIYYSVGAGITDKGEVPNGYNVSRSTTEDFPLRLELAAPSQTSVYFCASXLAGXXXYNEQFFGPGTRLTVL	1	279	281	292	301	346	AATGCTGGTGTCACTCAGACCCCAAAATTCCACATCCTGAAGATAGGACAGAGCATGACACTGCAGTGTACCCAGGATATGAACCATAACTACATGTACTGGTATCGACAAGACCCAGGCATGGGGCTGAAGCTGATTTATTATTCAGTTGGTGCTGGTATCACTGATAAAGGAGAAGTCCCGAATGGCTACAACGTCTCCAGATCAACCACAGAGGATTTCCCGCTCAGGCTGGAGTTGGCTGCTCCCTCCCAGACATCTGTGTACTTCTGTGCCAGC	NAGVTQTPKFHILKIGQSMTLQCTQDMNHNYMYWYRQDPGMGLKLIYYSVGAGITDKGEVPNGYNVSRSTTEDFPLRLELAAPSQTSVYFCAS	AATGCTGGTGTCACTCAGACCCCAAAATTCCGCATCCTGAAGATAGGACAGAGCATGACACTGCAGTGTACCCAGGATATGAACCATAACTACATGTACTGGTATCGACAAGACCCAGGCATGGGGCTGAAGCTGATTTATTATTCAGTTGGTGCTGGTATCACTGATAAAGGAGAAGTCCCGAATGGCTACAACGTCTCCAGATCAACCACAGAGGATTTCCCGCTCAGGCTGGAGTTGGCTGCTCCCTCCCAGACATCTGTGTACTTCTGTGCCAGC	NAGVTQTPKFRILKIGQSMTLQCTQDMNHNYMYWYRQDPGMGLKLIYYSVGAGITDKGEVPNGYNVSRSTTEDFPLRLELAAPSQTSVYFCAS	GACTAGCGGGGG	LAG	GACTAGCGGGGG	LAG	TACAATGAGCAGTTCTTCGGGCCAGGGACACGGCTCACCGTGCTAG	YNEQFFGPGTRLTVL	TACAATGAGCAGTTCTTCGGGCCAGGGACACGGCTCACCGTGCTAG	YNEQFFGPGTRLTVL	AATGCTGGTGTCACTCAGACCCCAAAATTCCACATCCTGAAGATAGGACAGAGCATGACACTGCAGTGTACCCAGGAT	NAGVTQTPKFHILKIGQSMTLQCTQD	ATGAACCATAACTAC	MNHNY	ATGTACTGGTATCGACAAGACCCAGGCATGGGGCTGAAGCTGATTTATTAT	MYWYRQDPGMGLKLIYY	TCAGTTGGTGCTGGTATC	SVGAGI
Pat_453	KW11	GTGTTAGTCAACACGT	TCRbeta	tig00000012_GTGTTAGTCAACACGT	1394	474	1	GCTGCTGGAGTCATCCAGTCCCCAAGACATCTGATCAAAGAAAAGAGGGAAACAGCCACTCTGAAATGCTATCCTATCCCTAGACACGACACTGTCTACTGGTACCAGCAGGGTCCAGGTCAGGACCCCCAGTTCCTCATTTCGTTTTATGAAAAGATGCAGAGCGATAAAGGAAGCATCCCTGATCGATTCTCAGCTCAACAGTTCAGTGACTATCATTCTGAACTGAACATGAGCTCCTTGGAGCTGGGGGACTCAGCCCTGTACTTCTGTGCCAGCAGCTTCTACAACACTGAAGCTTTCTTTGGACAAGGCACCAGACTCACAGTTGTAG	AAGVIQSPRHLIKEKRETATLKCYPIPRHDTVYWYQQGPGQDPQFLISFYEKMQSDKGSIPDRFSAQQFSDYHSELNMSSLELGDSALYFCASSFYNTEAFFGQGTRLTVV	TRB	F	T	F	T	F	T	TRBV13*01		TRBJ1-1*01	GCTGCTGGAGTCATCCAGTCCCCAAGACATCTGATCAAAGAAAAGAGGGAAACAGCCACTCTGAAATGCTATCCTATCCCTAGACACGACACTGTCTACTGGTACCAGCAGGGTCCAGGTCAGGACCCCCAGTTCCTCATTTCGTTTTATGAAAAGATGCAGAGCGATAAAGGAAGCATCCCTGATCGATTCTCAGCTCAACAGTTCAGTGACTATCATTCTGAACTGAACATGAGCTCCTTGGAGCTGGGGGACTCAGCCCTGTACTTCTGTGCCAGCAGCTTCTACAACACTGAAGCTTTCTTTGGACAAGGCACCAGACTCACAGTTGTAG	GCTGCTGGAGTCATCCAGTCCCCAAGACATCTGATCAAAGAAAAGAGGGAAACAGCCACTCTGAAATGCTATCCTATCCCTAGACACGACACTGTCTACTGGTACCAGCAGGGTCCAGGTCAGGACCCCCAGTTCCTCATTTCGTTTTATGAAAAGATGCAGAGCGATAAAGGAAGCATCCCTGATCGATTCTCAGCTCAACAGTTCAGTGACTATCATTCTGAACTGAACATGAGCTCCTTGGAGCTGGGGGACTCAGCCCTGTACTTCTGTGCCAGCAGCTTNNNNAACACTGAAGCTTTCTTTGGACAAGGCACCAGACTCACAGTTGTAG	AAGVIQSPRHLIKEKRETATLKCYPIPRHDTVYWYQQGPGQDPQFLISFYEKMQSDKGSIPDRFSAQQFSDYHSELNMSSLELGDSALYFCASSFYNTEAFFGQGTRLTVV	AAGVIQSPRHLIKEKRETATLKCYPIPRHDTVYWYQQGPGQDPQFLISFYEKMQSDKGSIPDRFSAQQFSDYHSELNMSSLELGDSALYFCASSXXNTEAFFGQGTRLTVV	1	284			289	334	GCTGCTGGAGTCATCCAGTCCCCAAGACATCTGATCAAAGAAAAGAGGGAAACAGCCACTCTGAAATGCTATCCTATCCCTAGACACGACACTGTCTACTGGTACCAGCAGGGTCCAGGTCAGGACCCCCAGTTCCTCATTTCGTTTTATGAAAAGATGCAGAGCGATAAAGGAAGCATCCCTGATCGATTCTCAGCTCAACAGTTCAGTGACTATCATTCTGAACTGAACATGAGCTCCTTGGAGCTGGGGGACTCAGCCCTGTACTTCTGTGCCAGCAGCTT	AAGVIQSPRHLIKEKRETATLKCYPIPRHDTVYWYQQGPGQDPQFLISFYEKMQSDKGSIPDRFSAQQFSDYHSELNMSSLELGDSALYFCASS	GCTGCTGGAGTCATCCAGTCCCCAAGACATCTGATCAAAGAAAAGAGGGAAACAGCCACTCTGAAATGCTATCCTATCCCTAGACACGACACTGTCTACTGGTACCAGCAGGGTCCAGGTCAGGACCCCCAGTTCCTCATTTCGTTTTATGAAAAGATGCAGAGCGATAAAGGAAGCATCCCTGATCGATTCTCAGCTCAACAGTTCAGTGACTATCATTCTGAACTGAACATGAGCTCCTTGGAGCTGGGGGACTCAGCCCTGTACTTCTGTGCCAGCAGCTT	AAGVIQSPRHLIKEKRETATLKCYPIPRHDTVYWYQQGPGQDPQFLISFYEKMQSDKGSIPDRFSAQQFSDYHSELNMSSLELGDSALYFCASS					AACACTGAAGCTTTCTTTGGACAAGGCACCAGACTCACAGTTGTAG	NTEAFFGQGTRLTVV	AACACTGAAGCTTTCTTTGGACAAGGCACCAGACTCACAGTTGTAG	NTEAFFGQGTRLTVV	GCTGCTGGAGTCATCCAGTCCCCAAGACATCTGATCAAAGAAAAGAGGGAAACAGCCACTCTGAAATGCTATCCTATC	AAGVIQSPRHLIKEKRETATLKCYPI	CCTAGACACGACACT	PRHDT	GTCTACTGGTACCAGCAGGGTCCAGGTCAGGACCCCCAGTTCCTCATTTCG	VYWYQQGPGQDPQFLIS	TTTTATGAAAAGATGCAG	FYEKMQ
Pat_453	KW11	TAAGAGACAACTGCTA	TCRbeta	tig00000378_TAAGAGACAACTGCTA	813	372	1	GCTGCTGGAGTCATCCAGTCCCCAAGACATCTGATCAAAGAAAAGAGGGAAACAGCCACTCTGAAATGCTATCCTATCCCTAGACACGACACTGTCTACTGGTACCAGCAGGGTCCAGGTCAGGACCCCCAGTTCCTCATTTCGTTTTATGAAAAGATGCAGAGCGATAAAGGAAGCATCCCTGATCGATTCTCAGCTCAACAGTTCAGTGACTATCATTCTGAACTGAACATGAGCTCCTTGGAGCTGGGGGACTCAGCCCTGTACTTCTGTGCCAGCAGCTCCAGCGACCCGGCGTGGGGCGGGGGGGCCCACTCCCTAACGGATACGCAGTATTTTGGCCCAGGCACCCGGCTGACAGTGCTCG	AAGVIQSPRHLIKEKRETATLKCYPIPRHDTVYWYQQGPGQDPQFLISFYEKMQSDKGSIPDRFSAQQFSDYHSELNMSSLELGDSALYFCASSSSDPAWGGGAHSLTDTQYFGPGTRLTVL	TRB	F	T	F	T	F	T	TRBV13*01	TRBD2*01	TRBJ2-3*01	GCTGCTGGAGTCATCCAGTCCCCAAGACATCTGATCAAAGAAAAGAGGGAAACAGCCACTCTGAAATGCTATCCTATCCCTAGACACGACACTGTCTACTGGTACCAGCAGGGTCCAGGTCAGGACCCCCAGTTCCTCATTTCGTTTTATGAAAAGATGCAGAGCGATAAAGGAAGCATCCCTGATCGATTCTCAGCTCAACAGTTCAGTGACTATCATTCTGAACTGAACATGAGCTCCTTGGAGCTGGGGGACTCAGCCCTGTACTTCTGTGCCAGCAGCTCCAGCGACCCGGCGTGGGGCGGGGGGGCCCACTCCCTAACGGATACGCAGTATTTTGGCCCAGGCACCCGGCTGACAGTGCTCG	GCTGCTGGAGTCATCCAGTCCCCAAGACATCTGATCAAAGAAAAGAGGGAAACAGCCACTCTGAAATGCTATCCTATCCCTAGACACGACACTGTCTACTGGTACCAGCAGGGTCCAGGTCAGGACCCCCAGTTCCTCATTTCGTTTTATGAAAAGATGCAGAGCGATAAAGGAAGCATCCCTGATCGATTCTCAGCTCAACAGTTCAGTGACTATCATTCTGAACTGAACATGAGCTCCTTGGAGCTGGGGGACTCAGCCCTGTACTTCTGTGCCAGCAGCTNNNNNNNNNNNNNNNNNNGCGGGGGGGNNNNNNNNNNNNNNGATACGCAGTATTTTGGCCCAGGCACCCGGCTGACAGTGCTCG	AAGVIQSPRHLIKEKRETATLKCYPIPRHDTVYWYQQGPGQDPQFLISFYEKMQSDKGSIPDRFSAQQFSDYHSELNMSSLELGDSALYFCASSSSDPAWGGGAHSLTDTQYFGPGTRLTVL	AAGVIQSPRHLIKEKRETATLKCYPIPRHDTVYWYQQGPGQDPQFLISFYEKMQSDKGSIPDRFSAQQFSDYHSELNMSSLELGDSALYFCASSXXXXXXXGGXXXXXDTQYFGPGTRLTVL	1	283	302	310	325	367	GCTGCTGGAGTCATCCAGTCCCCAAGACATCTGATCAAAGAAAAGAGGGAAACAGCCACTCTGAAATGCTATCCTATCCCTAGACACGACACTGTCTACTGGTACCAGCAGGGTCCAGGTCAGGACCCCCAGTTCCTCATTTCGTTTTATGAAAAGATGCAGAGCGATAAAGGAAGCATCCCTGATCGATTCTCAGCTCAACAGTTCAGTGACTATCATTCTGAACTGAACATGAGCTCCTTGGAGCTGGGGGACTCAGCCCTGTACTTCTGTGCCAGCAGCT	AAGVIQSPRHLIKEKRETATLKCYPIPRHDTVYWYQQGPGQDPQFLISFYEKMQSDKGSIPDRFSAQQFSDYHSELNMSSLELGDSALYFCASS	GCTGCTGGAGTCATCCAGTCCCCAAGACATCTGATCAAAGAAAAGAGGGAAACAGCCACTCTGAAATGCTATCCTATCCCTAGACACGACACTGTCTACTGGTACCAGCAGGGTCCAGGTCAGGACCCCCAGTTCCTCATTTCGTTTTATGAAAAGATGCAGAGCGATAAAGGAAGCATCCCTGATCGATTCTCAGCTCAACAGTTCAGTGACTATCATTCTGAACTGAACATGAGCTCCTTGGAGCTGGGGGACTCAGCCCTGTACTTCTGTGCCAGCAGCT	AAGVIQSPRHLIKEKRETATLKCYPIPRHDTVYWYQQGPGQDPQFLISFYEKMQSDKGSIPDRFSAQQFSDYHSELNMSSLELGDSALYFCASS	GCGGGGGGG	GG	GCGGGGGGG	GG	GATACGCAGTATTTTGGCCCAGGCACCCGGCTGACAGTGCTCG	DTQYFGPGTRLTVL	GATACGCAGTATTTTGGCCCAGGCACCCGGCTGACAGTGCTCG	DTQYFGPGTRLTVL	GCTGCTGGAGTCATCCAGTCCCCAAGACATCTGATCAAAGAAAAGAGGGAAACAGCCACTCTGAAATGCTATCCTATC	AAGVIQSPRHLIKEKRETATLKCYPI	CCTAGACACGACACT	PRHDT	GTCTACTGGTACCAGCAGGGTCCAGGTCAGGACCCCCAGTTCCTCATTTCG	VYWYQQGPGQDPQFLIS	TTTTATGAAAAGATGCAG	FYEKMQ
Pat_453	IW9	TCACGAAAGATGTAAC	TCRbeta	tig00000012_TCACGAAAGATGTAAC	1044	254	1	GATGCTGAAATCACCCAGAGCCCAAGACACAAGATCACAGAGACAGGAAGGCAGGTGACCTTGGCGTGTCACCAGATTTGGAACCACAACAATATGTTCTGGTATCGACAAGACCTGGGACATGGGCTGAGGCTGATCCATTACTCATATGGTGTTCAAGACACTAACAAAGGAGAAGTCTCAGATGGCTACAGTGTCTCTAGATCAAACACAGAGGACCTCCCCCTCACTCTGGAGTCTGCTGCCTCCTCCCAGACATCTGTATATTTCTGCGCCAGCAGTGACTCAGAGGGGACAGGTCCTCGGCGGAATACAGATACGCAGTATTTTGGCCCAGGCACCCGGCTGACAGTGCTCG	DAEITQSPRHKITETGRQVTLACHQIWNHNNMFWYRQDLGHGLRLIHYSYGVQDTNKGEVSDGYSVSRSNTEDLPLTLESAASSQTSVYFCASSDSEGTGPRRNTDTQYFGPGTRLTVL	TRB	F	T	F	T	F	T	TRBV10-1*01	TRBD1*01	TRBJ2-3*01	GATGCTGAAATCACCCAGAGCCCAAGACACAAGATCACAGAGACAGGAAGGCAGGTGACCTTGGCGTGTCACCAGATTTGGAACCACAACAATATGTTCTGGTATCGACAAGACCTGGGACATGGGCTGAGGCTGATCCATTACTCATATGGTGTTCAAGACACTAACAAAGGAGAAGTCTCAGATGGCTACAGTGTCTCTAGATCAAACACAGAGGACCTCCCCCTCACTCTGGAGTCTGCTGCCTCCTCCCAGACATCTGTATATTTCTGCGCCAGCAGTGACTCAGAGGGGACAGGTCCTCGGCGGAATACAGATACGCAGTATTTTGGCCCAGGCACCCGGCTGACAGTGCTCG	GATGCTGAAATCACCCAGAGCCCAAGACACAAGATCACAGAGACAGGAAGGCAGGTGACCTTGGCGTGTCACCAGACTTGGAACCACAACAATATGTTCTGGTATCGACAAGACCTGGGACATGGGCTGAGGCTGATCCATTACTCATATGGTGTTCAAGACACTAACAAAGGAGAAGTCTCAGATGGCTACAGTGTCTCTAGATCAAACACAGAGGACCTCCCCCTCACTCTGGAGTCTGCTGCCTCCTCCCAGACATCTGTATATTTCTGCGCCAGCAGTGAGTCNNNNGGGACAGGNNNNNNNNNNNNNACAGATACGCAGTATTTTGGCCCAGGCACCCGGCTGACAGTGCTCG	DAEITQSPRHKITETGRQVTLACHQIWNHNNMFWYRQDLGHGLRLIHYSYGVQDTNKGEVSDGYSVSRSNTEDLPLTLESAASSQTSVYFCASSDSEGTGPRRNTDTQYFGPGTRLTVL	DAEITQSPRHKITETGRQVTLACHQTWNHNNMFWYRQDLGHGLRLIHYSYGVQDTNKGEVSDGYSVSRSNTEDLPLTLESAASSQTSVYFCASSESXGTGXXXXTDTQYFGPGTRLTVL	1	287	292	299	313	358	GATGCTGAAATCACCCAGAGCCCAAGACACAAGATCACAGAGACAGGAAGGCAGGTGACCTTGGCGTGTCACCAGATTTGGAACCACAACAATATGTTCTGGTATCGACAAGACCTGGGACATGGGCTGAGGCTGATCCATTACTCATATGGTGTTCAAGACACTAACAAAGGAGAAGTCTCAGATGGCTACAGTGTCTCTAGATCAAACACAGAGGACCTCCCCCTCACTCTGGAGTCTGCTGCCTCCTCCCAGACATCTGTATATTTCTGCGCCAGCAGTGACTC	DAEITQSPRHKITETGRQVTLACHQIWNHNNMFWYRQDLGHGLRLIHYSYGVQDTNKGEVSDGYSVSRSNTEDLPLTLESAASSQTSVYFCASSDS	GATGCTGAAATCACCCAGAGCCCAAGACACAAGATCACAGAGACAGGAAGGCAGGTGACCTTGGCGTGTCACCAGACTTGGAACCACAACAATATGTTCTGGTATCGACAAGACCTGGGACATGGGCTGAGGCTGATCCATTACTCATATGGTGTTCAAGACACTAACAAAGGAGAAGTCTCAGATGGCTACAGTGTCTCTAGATCAAACACAGAGGACCTCCCCCTCACTCTGGAGTCTGCTGCCTCCTCCCAGACATCTGTATATTTCTGCGCCAGCAGTGAGTC	DAEITQSPRHKITETGRQVTLACHQTWNHNNMFWYRQDLGHGLRLIHYSYGVQDTNKGEVSDGYSVSRSNTEDLPLTLESAASSQTSVYFCASSES	GGGACAGG	GTG	GGGACAGG	GTG	ACAGATACGCAGTATTTTGGCCCAGGCACCCGGCTGACAGTGCTCG	TDTQYFGPGTRLTVL	ACAGATACGCAGTATTTTGGCCCAGGCACCCGGCTGACAGTGCTCG	TDTQYFGPGTRLTVL	GATGCTGAAATCACCCAGAGCCCAAGACACAAGATCACAGAGACAGGAAGGCAGGTGACCTTGGCGTGTCACCAGATT	DAEITQSPRHKITETGRQVTLACHQI	TGGAACCACAACAAT	WNHNN	ATGTTCTGGTATCGACAAGACCTGGGACATGGGCTGAGGCTGATCCATTAC	MFWYRQDLGHGLRLIHY	TCATATGGTGTTCAAGAC	SYGVQD
Pat_453	KW11	TCAGGTAGTTAAAGAC	TCRbeta	tig00000365_TCAGGTAGTTAAAGAC	1253	180	1	GATTCTGGAGTCACACAAACCCCAAAGCACCTGATCACAGCAACTGGACAGCGAGTGACGCTGAGATGCTCCCCTAGGTCTGGAGACCTCTCTGTGTACTGGTACCAACAGAGCCTGGACCAGGGCCTCCAGTTCCTCATTCAGTATTATAATGGAGAAGAGAGAGCAAAAGGAAACATTCTTGAACGATTCTCCGCACAACAGTTCCCTGACTTGCACTCTGAACTAAACCTGAGCTCTCTGGAGCTGGGGGACTCAGCTTTGTATTTCTGTGCCAGCAGCTGGACTAGCGGGGGGCCAAGGGAGACCCAGTACTTCGGGCCAGGCACGCGGCTCCTGGTGCTCG	DSGVTQTPKHLITATGQRVTLRCSPRSGDLSVYWYQQSLDQGLQFLIQYYNGEERAKGNILERFSAQQFPDLHSELNLSSLELGDSALYFCASSWTSGGPRETQYFGPGTRLLVL	TRB	F	T	F	T	F	T	TRBV9*01	TRBD2*01	TRBJ2-5*01	GATTCTGGAGTCACACAAACCCCAAAGCACCTGATCACAGCAACTGGACAGCGAGTGACGCTGAGATGCTCCCCTAGGTCTGGAGACCTCTCTGTGTACTGGTACCAACAGAGCCTGGACCAGGGCCTCCAGTTCCTCATTCAGTATTATAATGGAGAAGAGAGAGCAAAAGGAAACATTCTTGAACGATTCTCCGCACAACAGTTCCCTGACTTGCACTCTGAACTAAACCTGAGCTCTCTGGAGCTGGGGGACTCAGCTTTGTATTTCTGTGCCAGCAGCTGGACTAGCGGGGGGCCAAGGGAGACCCAGTACTTCGGGCCAGGCACGCGGCTCCTGGTGCTCG	GATTCTGGAGTCACACAAACCCCAAAGCACCTGATCACAGCAACTGGACAGCGAGTGACGCTGAGATGCTCCCCTAGGTCTGGAGACCTCTCTGTGTACTGGTACCAACAGAGCCTGGACCAGGGCCTCCAGTTCCTCATTCAGTATTATAATGGAGAAGAGAGAGCAAAAGGAAACATTCTTGAACGATTCTCCGCACAACAGTTCCCTGACTTGCACTCTGAACTAAACCTGAGCTCTCTGGAGCTGGGGGACTCAGCTTTGTATTTCTGTGCCAGCAGCNGGACTAGCGGGGGGNNNNNNGAGACCCAGTACTTCGGGCCAGGCACGCGGCTCCTGGTGCTCG	DSGVTQTPKHLITATGQRVTLRCSPRSGDLSVYWYQQSLDQGLQFLIQYYNGEERAKGNILERFSAQQFPDLHSELNLSSLELGDSALYFCASSWTSGGPRETQYFGPGTRLLVL	DSGVTQTPKHLITATGQRVTLRCSPRSGDLSVYWYQQSLDQGLQFLIQYYNGEERAKGNILERFSAQQFPDLHSELNLSSLELGDSALYFCASSXTSGGXXETQYFGPGTRLLVL	1	282	284	297	304	346	GATTCTGGAGTCACACAAACCCCAAAGCACCTGATCACAGCAACTGGACAGCGAGTGACGCTGAGATGCTCCCCTAGGTCTGGAGACCTCTCTGTGTACTGGTACCAACAGAGCCTGGACCAGGGCCTCCAGTTCCTCATTCAGTATTATAATGGAGAAGAGAGAGCAAAAGGAAACATTCTTGAACGATTCTCCGCACAACAGTTCCCTGACTTGCACTCTGAACTAAACCTGAGCTCTCTGGAGCTGGGGGACTCAGCTTTGTATTTCTGTGCCAGCAGC	DSGVTQTPKHLITATGQRVTLRCSPRSGDLSVYWYQQSLDQGLQFLIQYYNGEERAKGNILERFSAQQFPDLHSELNLSSLELGDSALYFCASS	GATTCTGGAGTCACACAAACCCCAAAGCACCTGATCACAGCAACTGGACAGCGAGTGACGCTGAGATGCTCCCCTAGGTCTGGAGACCTCTCTGTGTACTGGTACCAACAGAGCCTGGACCAGGGCCTCCAGTTCCTCATTCAGTATTATAATGGAGAAGAGAGAGCAAAAGGAAACATTCTTGAACGATTCTCCGCACAACAGTTCCCTGACTTGCACTCTGAACTAAACCTGAGCTCTCTGGAGCTGGGGGACTCAGCTTTGTATTTCTGTGCCAGCAGC	DSGVTQTPKHLITATGQRVTLRCSPRSGDLSVYWYQQSLDQGLQFLIQYYNGEERAKGNILERFSAQQFPDLHSELNLSSLELGDSALYFCASS	GGACTAGCGGGGGG	TSGG	GGACTAGCGGGGGG	TSGG	GAGACCCAGTACTTCGGGCCAGGCACGCGGCTCCTGGTGCTCG	ETQYFGPGTRLLVL	GAGACCCAGTACTTCGGGCCAGGCACGCGGCTCCTGGTGCTCG	ETQYFGPGTRLLVL	GATTCTGGAGTCACACAAACCCCAAAGCACCTGATCACAGCAACTGGACAGCGAGTGACGCTGAGATGCTCCCCTAGG	DSGVTQTPKHLITATGQRVTLRCSPR	TCTGGAGACCTCTCT	SGDLS	GTGTACTGGTACCAACAGAGCCTGGACCAGGGCCTCCAGTTCCTCATTCAG	VYWYQQSLDQGLQFLIQ	TATTATAATGGAGAAGAG	YYNGEE
Pat_453	TW10	TGAGCCGAGAGATGAG	TCRbeta	tig00000003_TGAGCCGAGAGATGAG	1083	105	1	GCTGCTGGAGTCATCCAGTCCCCAAGACATCTGATCAAAGAAAAGAGGGAAACAGCCACTCTGAAATGCTATCCTATCCCTAGACACGACACTGTCTACTGGTACCAGCAGGGTCCAGGTCAGGACCCCCAGTTCCTCATTTCGTTTTATGAAAAGATGCAGAGCGATAAAGGAAGCATCCCTGATCGATTCTCAGCTCAACAGTTCAGTGACTATCATTCTGAACTGAACATGAGCTCCTTGGAGCTGGGGGACTCAGCCCTGTACTTCTGTGCCAGCAGCCAGCGGGGGGGTAGCACAGATACGCAGTATTTTGGCCCAGGCACCCGGCTGACAGTGCTCG	AAGVIQSPRHLIKEKRETATLKCYPIPRHDTVYWYQQGPGQDPQFLISFYEKMQSDKGSIPDRFSAQQFSDYHSELNMSSLELGDSALYFCASSQRGGSTDTQYFGPGTRLTVL	TRB	F	T	F	T	F	T	TRBV13*01	TRBD2*01	TRBJ2-3*01	GCTGCTGGAGTCATCCAGTCCCCAAGACATCTGATCAAAGAAAAGAGGGAAACAGCCACTCTGAAATGCTATCCTATCCCTAGACACGACACTGTCTACTGGTACCAGCAGGGTCCAGGTCAGGACCCCCAGTTCCTCATTTCGTTTTATGAAAAGATGCAGAGCGATAAAGGAAGCATCCCTGATCGATTCTCAGCTCAACAGTTCAGTGACTATCATTCTGAACTGAACATGAGCTCCTTGGAGCTGGGGGACTCAGCCCTGTACTTCTGTGCCAGCAGCCAGCGGGGGGGTAGCACAGATACGCAGTATTTTGGCCCAGGCACCCGGCTGACAGTGCTCG	GCTGCTGGAGTCATCCAGTCCCCAAGACATCTGATCAAAGAAAAGAGGGAAACAGCCACTCTGAAATGCTATCCTATCCCTAGACACGACACTGTCTACTGGTACCAGCAGGGTCCAGGTCAGGACCCCCAGTTCCTCATTTCGTTTTATGAAAAGATGCAGAGCGATAAAGGAAGCATCCCTGATCGATTCTCAGCTCAACAGTTCAGTGACTATCATTCTGAACTGAACATGAGCTCCTTGGAGCTGGGGGACTCAGCCCTGTACTTCTGTGCCAGCAGCNAGCGGGGGGGNAGCACAGATACGCAGTATTTTGGCCCAGGCACCCGGCTGACAGTGCTCG	AAGVIQSPRHLIKEKRETATLKCYPIPRHDTVYWYQQGPGQDPQFLISFYEKMQSDKGSIPDRFSAQQFSDYHSELNMSSLELGDSALYFCASSQRGGSTDTQYFGPGTRLTVL	AAGVIQSPRHLIKEKRETATLKCYPIPRHDTVYWYQQGPGQDPQFLISFYEKMQSDKGSIPDRFSAQQFSDYHSELNMSSLELGDSALYFCASSXRGGSTDTQYFGPGTRLTVL	1	282	284	293	295	343	GCTGCTGGAGTCATCCAGTCCCCAAGACATCTGATCAAAGAAAAGAGGGAAACAGCCACTCTGAAATGCTATCCTATCCCTAGACACGACACTGTCTACTGGTACCAGCAGGGTCCAGGTCAGGACCCCCAGTTCCTCATTTCGTTTTATGAAAAGATGCAGAGCGATAAAGGAAGCATCCCTGATCGATTCTCAGCTCAACAGTTCAGTGACTATCATTCTGAACTGAACATGAGCTCCTTGGAGCTGGGGGACTCAGCCCTGTACTTCTGTGCCAGCAGC	AAGVIQSPRHLIKEKRETATLKCYPIPRHDTVYWYQQGPGQDPQFLISFYEKMQSDKGSIPDRFSAQQFSDYHSELNMSSLELGDSALYFCASS	GCTGCTGGAGTCATCCAGTCCCCAAGACATCTGATCAAAGAAAAGAGGGAAACAGCCACTCTGAAATGCTATCCTATCCCTAGACACGACACTGTCTACTGGTACCAGCAGGGTCCAGGTCAGGACCCCCAGTTCCTCATTTCGTTTTATGAAAAGATGCAGAGCGATAAAGGAAGCATCCCTGATCGATTCTCAGCTCAACAGTTCAGTGACTATCATTCTGAACTGAACATGAGCTCCTTGGAGCTGGGGGACTCAGCCCTGTACTTCTGTGCCAGCAGC	AAGVIQSPRHLIKEKRETATLKCYPIPRHDTVYWYQQGPGQDPQFLISFYEKMQSDKGSIPDRFSAQQFSDYHSELNMSSLELGDSALYFCASS	AGCGGGGGGG	RGG	AGCGGGGGGG	RGG	AGCACAGATACGCAGTATTTTGGCCCAGGCACCCGGCTGACAGTGCTCG	STDTQYFGPGTRLTVL	AGCACAGATACGCAGTATTTTGGCCCAGGCACCCGGCTGACAGTGCTCG	STDTQYFGPGTRLTVL	GCTGCTGGAGTCATCCAGTCCCCAAGACATCTGATCAAAGAAAAGAGGGAAACAGCCACTCTGAAATGCTATCCTATC	AAGVIQSPRHLIKEKRETATLKCYPI	CCTAGACACGACACT	PRHDT	GTCTACTGGTACCAGCAGGGTCCAGGTCAGGACCCCCAGTTCCTCATTTCG	VYWYQQGPGQDPQFLIS	TTTTATGAAAAGATGCAG	FYEKMQ
Pat_453	KW11	TGCCAAATCAGCTCGG	TCRbeta	tig00000104_TGCCAAATCAGCTCGG	913	159	1	GACGCTGGAGTCACCCAAAGTCCCACACACCTGATCAAAACGAGAGGACAGCAAGTGACTCTGAGATGCTCTCCTAAGTCTGGGCATGACACTGTGTCCTGGTACCAACAGGCCCTGGGTCAGGGGCCCCAGTTTATCTTTCAGTATTATGAGGAGGAAGAGAGACAGAGAGGCAACTTCCCTGATCGATTCTCAGGTCACCAGTACCCTAACTATAGCTCTGAGCTGAATGTGAACGCCTTGTTGCTGGGGGACTCGGCCCTCTATCTCTGTGCCAGCAGCTACAGGACGCGCGAGACCCAGTACTTCGGGCCAGGCACGCGGCTCCTGGTGCTCG	DAGVTQSPTHLIKTRGQQVTLRCSPKSGHDTVSWYQQALGQGPQFIFQYYEEEERQRGNFPDRFSGHQYPNYSSELNVNALLLGDSALYLCASSYRTRETQYFGPGTRLLVL	TRB	F	T	F	T	F	T	TRBV5-6*01	TRBD1*01	TRBJ2-5*01	GACGCTGGAGTCACCCAAAGTCCCACACACCTGATCAAAACGAGAGGACAGCAAGTGACTCTGAGATGCTCTCCTAAGTCTGGGCATGACACTGTGTCCTGGTACCAACAGGCCCTGGGTCAGGGGCCCCAGTTTATCTTTCAGTATTATGAGGAGGAAGAGAGACAGAGAGGCAACTTCCCTGATCGATTCTCAGGTCACCAGTACCCTAACTATAGCTCTGAGCTGAATGTGAACGCCTTGTTGCTGGGGGACTCGGCCCTCTATCTCTGTGCCAGCAGCTACAGGACGCGCGAGACCCAGTACTTCGGGCCAGGCACGCGGCTCCTGGTGCTCG	GACGCTGGAGTCACCCAAAGTCCCACACACCTGATCAAAACGAGAGGACAGCAAGTGACTCTGAGATGCTCTCCTAAGTCTGGGCATGACACTGTGTCCTGGTACCAACAGGCCCTGGGTCAGGGGCCCCAGTTTATCTTTCAGTATTATGAGGAGGAAGAGAGACAGAGAGGCAACTTCCCTGATCGATTCTCAGGTCACCAGTTCCCTAACTATAGCTCTGAGCTGAATGTGAACGCCTTGTTGCTGGGGGACTCGGCCCTCTATCTCTGTGCCAGCAGCTACAGGNNNNNNGAGACCCAGTACTTCGGGCCAGGCACGCGGCTCCTGGTGCTCG	DAGVTQSPTHLIKTRGQQVTLRCSPKSGHDTVSWYQQALGQGPQFIFQYYEEEERQRGNFPDRFSGHQYPNYSSELNVNALLLGDSALYLCASSYRTRETQYFGPGTRLLVL	DAGVTQSPTHLIKTRGQQVTLRCSPKSGHDTVSWYQQALGQGPQFIFQYYEEEERQRGNFPDRFSGHQFPNYSSELNVNALLLGDSALYLCASSYRXXETQYFGPGTRLLVL	1	283	284	288	295	337	GACGCTGGAGTCACCCAAAGTCCCACACACCTGATCAAAACGAGAGGACAGCAAGTGACTCTGAGATGCTCTCCTAAGTCTGGGCATGACACTGTGTCCTGGTACCAACAGGCCCTGGGTCAGGGGCCCCAGTTTATCTTTCAGTATTATGAGGAGGAAGAGAGACAGAGAGGCAACTTCCCTGATCGATTCTCAGGTCACCAGTACCCTAACTATAGCTCTGAGCTGAATGTGAACGCCTTGTTGCTGGGGGACTCGGCCCTCTATCTCTGTGCCAGCAGCT	DAGVTQSPTHLIKTRGQQVTLRCSPKSGHDTVSWYQQALGQGPQFIFQYYEEEERQRGNFPDRFSGHQYPNYSSELNVNALLLGDSALYLCASS	GACGCTGGAGTCACCCAAAGTCCCACACACCTGATCAAAACGAGAGGACAGCAAGTGACTCTGAGATGCTCTCCTAAGTCTGGGCATGACACTGTGTCCTGGTACCAACAGGCCCTGGGTCAGGGGCCCCAGTTTATCTTTCAGTATTATGAGGAGGAAGAGAGACAGAGAGGCAACTTCCCTGATCGATTCTCAGGTCACCAGTTCCCTAACTATAGCTCTGAGCTGAATGTGAACGCCTTGTTGCTGGGGGACTCGGCCCTCTATCTCTGTGCCAGCAGCT	DAGVTQSPTHLIKTRGQQVTLRCSPKSGHDTVSWYQQALGQGPQFIFQYYEEEERQRGNFPDRFSGHQFPNYSSELNVNALLLGDSALYLCASS	ACAGG	R	ACAGG	R	GAGACCCAGTACTTCGGGCCAGGCACGCGGCTCCTGGTGCTCG	ETQYFGPGTRLLVL	GAGACCCAGTACTTCGGGCCAGGCACGCGGCTCCTGGTGCTCG	ETQYFGPGTRLLVL	GACGCTGGAGTCACCCAAAGTCCCACACACCTGATCAAAACGAGAGGACAGCAAGTGACTCTGAGATGCTCTCCTAAG	DAGVTQSPTHLIKTRGQQVTLRCSPK	TCTGGGCATGACACT	SGHDT	GTGTCCTGGTACCAACAGGCCCTGGGTCAGGGGCCCCAGTTTATCTTTCAG	VSWYQQALGQGPQFIFQ	TATTATGAGGAGGAAGAG	YYEEEE
Pat_453	KW11	TGGCGCATCGAACGGA	TCRbeta	tig00000002_TGGCGCATCGAACGGA	851	501	1	AATGCTGGTGTCACTCAGACCCCAAAATTCCAGGTCCTGAAGACAGGACAGAGCATGACACTGCAGTGTGCCCAGGATATGAACCATGAATACATGTCCTGGTATCGACAAGACCCAGGCATGGGGCTGAGGCTGATTCATTACTCAGTTGGTGCTGGTATCACTGACCAAGGAGAAGTCCCCAATGGCTACAATGTCTCCAGATCAACCACAGAGGATTTCCCGCTCAGGCTGCTGTCGGCTGCTCCCTCCCAGACATCTGTGTACTTCTGTGCCAGCAGTTACTCGGTACAGGGAGGTGAAGCTTTCTTTGGACAAGGCACCAGACTCACAGTTGTAG	NAGVTQTPKFQVLKTGQSMTLQCAQDMNHEYMSWYRQDPGMGLRLIHYSVGAGITDQGEVPNGYNVSRSTTEDFPLRLLSAAPSQTSVYFCASSYSVQGGEAFFGQGTRLTVV	TRB	F	T	F	T	F	T	TRBV6-5*01	TRBD1*01	TRBJ1-1*01	AATGCTGGTGTCACTCAGACCCCAAAATTCCAGGTCCTGAAGACAGGACAGAGCATGACACTGCAGTGTGCCCAGGATATGAACCATGAATACATGTCCTGGTATCGACAAGACCCAGGCATGGGGCTGAGGCTGATTCATTACTCAGTTGGTGCTGGTATCACTGACCAAGGAGAAGTCCCCAATGGCTACAATGTCTCCAGATCAACCACAGAGGATTTCCCGCTCAGGCTGCTGTCGGCTGCTCCCTCCCAGACATCTGTGTACTTCTGTGCCAGCAGTTACTCGGTACAGGGAGGTGAAGCTTTCTTTGGACAAGGCACCAGACTCACAGTTGTAG	AATGCTGGTGTCACTCAGACCCCAAAATTCCAGGTCCTGAAGACAGGACAGAGCATGACACTGCAGTGTGCCCAGGATATGAACCATGAATACATGTCCTGGTATCGACAAGACCCAGGCATGGGGCTGAGGCTGATTCATTACTCAGTTGGTGCTGGTATCACTGACCAAGGAGAAGTCCCCAATGGCTACAATGTCTCCAGATCAACCACAGAGGATTTCCCGCTCAGGCTGCTGTCGGCTGCTCCCTCCCAGACATCTGTGTACTTCTGTGCCAGCAGTTACTCNNNACAGGGNNNTGAAGCTTTCTTTGGACAAGGCACCAGACTCACAGTTGTAG	NAGVTQTPKFQVLKTGQSMTLQCAQDMNHEYMSWYRQDPGMGLRLIHYSVGAGITDQGEVPNGYNVSRSTTEDFPLRLLSAAPSQTSVYFCASSYSVQGGEAFFGQGTRLTVV	NAGVTQTPKFQVLKTGQSMTLQCAQDMNHEYMSWYRQDPGMGLRLIHYSVGAGITDQGEVPNGYNVSRSTTEDFPLRLLSAAPSQTSVYFCASSYSXQGXEAFFGQGTRLTVV	1	287	291	296	300	340	AATGCTGGTGTCACTCAGACCCCAAAATTCCAGGTCCTGAAGACAGGACAGAGCATGACACTGCAGTGTGCCCAGGATATGAACCATGAATACATGTCCTGGTATCGACAAGACCCAGGCATGGGGCTGAGGCTGATTCATTACTCAGTTGGTGCTGGTATCACTGACCAAGGAGAAGTCCCCAATGGCTACAATGTCTCCAGATCAACCACAGAGGATTTCCCGCTCAGGCTGCTGTCGGCTGCTCCCTCCCAGACATCTGTGTACTTCTGTGCCAGCAGTTACTC	NAGVTQTPKFQVLKTGQSMTLQCAQDMNHEYMSWYRQDPGMGLRLIHYSVGAGITDQGEVPNGYNVSRSTTEDFPLRLLSAAPSQTSVYFCASSYS	AATGCTGGTGTCACTCAGACCCCAAAATTCCAGGTCCTGAAGACAGGACAGAGCATGACACTGCAGTGTGCCCAGGATATGAACCATGAATACATGTCCTGGTATCGACAAGACCCAGGCATGGGGCTGAGGCTGATTCATTACTCAGTTGGTGCTGGTATCACTGACCAAGGAGAAGTCCCCAATGGCTACAATGTCTCCAGATCAACCACAGAGGATTTCCCGCTCAGGCTGCTGTCGGCTGCTCCCTCCCAGACATCTGTGTACTTCTGTGCCAGCAGTTACTC	NAGVTQTPKFQVLKTGQSMTLQCAQDMNHEYMSWYRQDPGMGLRLIHYSVGAGITDQGEVPNGYNVSRSTTEDFPLRLLSAAPSQTSVYFCASSYS	ACAGGG	QG	ACAGGG	QG	TGAAGCTTTCTTTGGACAAGGCACCAGACTCACAGTTGTAG	EAFFGQGTRLTVV	TGAAGCTTTCTTTGGACAAGGCACCAGACTCACAGTTGTAG	EAFFGQGTRLTVV	AATGCTGGTGTCACTCAGACCCCAAAATTCCAGGTCCTGAAGACAGGACAGAGCATGACACTGCAGTGTGCCCAGGAT	NAGVTQTPKFQVLKTGQSMTLQCAQD	ATGAACCATGAATAC	MNHEY	ATGTCCTGGTATCGACAAGACCCAGGCATGGGGCTGAGGCTGATTCATTAC	MSWYRQDPGMGLRLIHY	TCAGTTGGTGCTGGTATC	SVGAGI
Pat726	IW9	AACTGGTTCACCCGAG	TCRbeta	tig00000003_AACTGGTTCACCCGAG	892	283	1	GACACTGAAGTTACCCAGACACCAAAACACCTGGTCATGGGAATGACAAATAAGAAGTCTTTGAAATGTGAACAACATATGGGGCACAGGGCTATGTATTGGTACAAGCAGAAAGCTAAGAAGCCACCGGAGCTCATGTTTGTCTACAGCTATGAGAAACTCTCTATAAATGAAAGTGTGCCAAGTCGCTTCTCACCTGAATGCCCCAACAGCTCTCTCTTAAACCTTCACCTACACGCCCTGCAGCCAGAAGACTCAGCCCTGTATCTCTGCGCCAGCAGCCTCGAGGTCGGGGCAGGGCTTGGGGCTGAAGCTTTCTTTGGACAAGGCACCAGACTCACAGTTGTAG	DTEVTQTPKHLVMGMTNKKSLKCEQHMGHRAMYWYKQKAKKPPELMFVYSYEKLSINESVPSRFSPECPNSSLLNLHLHALQPEDSALYLCASSLEVGAGLGAEAFFGQGTRLTVV	TRB	F	T	F	T	F	T	TRBV4-1*01	TRBD1*01	TRBJ1-1*01	GACACTGAAGTTACCCAGACACCAAAACACCTGGTCATGGGAATGACAAATAAGAAGTCTTTGAAATGTGAACAACATATGGGGCACAGGGCTATGTATTGGTACAAGCAGAAAGCTAAGAAGCCACCGGAGCTCATGTTTGTCTACAGCTATGAGAAACTCTCTATAAATGAAAGTGTGCCAAGTCGCTTCTCACCTGAATGCCCCAACAGCTCTCTCTTAAACCTTCACCTACACGCCCTGCAGCCAGAAGACTCAGCCCTGTATCTCTGCGCCAGCAGCCTCGAGGTCGGGGCAGGGCTTGGGGCTGAAGCTTTCTTTGGACAAGGCACCAGACTCACAGTTGTAG	GACACTGAAGTTACCCAGACACCAAAACACCTGGTCATGGGAATGACAAATAAGAAGTCTTTGAAATGTGAACAACATATGGGGCACAGGGCTATGTATTGGTACAAGCAGAAAGCTAAGAAGCCACCGGAGCTCATGTTTGTCTACAGCTATGAGAAACTCTCTATAAATGAAAGTGTGCCAAGTCGCTTCTCACCTGAATGCCCCAACAGCTCTCTCTTAAACCTTCACCTACACGCCCTGCAGCCAGAAGACTCAGCCCTGTATCTCTGCGCCAGCAGCCNNNNNNNNGGGACAGGGNNNNNNNCTGAAGCTTTCTTTGGACAAGGCACCAGACTCACAGTTGTAG	DTEVTQTPKHLVMGMTNKKSLKCEQHMGHRAMYWYKQKAKKPPELMFVYSYEKLSINESVPSRFSPECPNSSLLNLHLHALQPEDSALYLCASSLEVGAGLGAEAFFGQGTRLTVV	DTEVTQTPKHLVMGMTNKKSLKCEQHMGHRAMYWYKQKAKKPPELMFVYSYEKLSINESVPSRFSPECPNSSLLNLHLHALQPEDSALYLCASSXXXGTGXXXEAFFGQGTRLTVV	1	283	292	300	308	349	GACACTGAAGTTACCCAGACACCAAAACACCTGGTCATGGGAATGACAAATAAGAAGTCTTTGAAATGTGAACAACATATGGGGCACAGGGCTATGTATTGGTACAAGCAGAAAGCTAAGAAGCCACCGGAGCTCATGTTTGTCTACAGCTATGAGAAACTCTCTATAAATGAAAGTGTGCCAAGTCGCTTCTCACCTGAATGCCCCAACAGCTCTCTCTTAAACCTTCACCTACACGCCCTGCAGCCAGAAGACTCAGCCCTGTATCTCTGCGCCAGCAGCC	DTEVTQTPKHLVMGMTNKKSLKCEQHMGHRAMYWYKQKAKKPPELMFVYSYEKLSINESVPSRFSPECPNSSLLNLHLHALQPEDSALYLCASS	GACACTGAAGTTACCCAGACACCAAAACACCTGGTCATGGGAATGACAAATAAGAAGTCTTTGAAATGTGAACAACATATGGGGCACAGGGCTATGTATTGGTACAAGCAGAAAGCTAAGAAGCCACCGGAGCTCATGTTTGTCTACAGCTATGAGAAACTCTCTATAAATGAAAGTGTGCCAAGTCGCTTCTCACCTGAATGCCCCAACAGCTCTCTCTTAAACCTTCACCTACACGCCCTGCAGCCAGAAGACTCAGCCCTGTATCTCTGCGCCAGCAGCC	DTEVTQTPKHLVMGMTNKKSLKCEQHMGHRAMYWYKQKAKKPPELMFVYSYEKLSINESVPSRFSPECPNSSLLNLHLHALQPEDSALYLCASS	GGGGCAGGG	GAG	GGGACAGGG	GTG	CTGAAGCTTTCTTTGGACAAGGCACCAGACTCACAGTTGTAG	EAFFGQGTRLTVV	CTGAAGCTTTCTTTGGACAAGGCACCAGACTCACAGTTGTAG	EAFFGQGTRLTVV	GACACTGAAGTTACCCAGACACCAAAACACCTGGTCATGGGAATGACAAATAAGAAGTCTTTGAAATGTGAACAACAT	DTEVTQTPKHLVMGMTNKKSLKCEQH	ATGGGGCACAGGGCT	MGHRA	ATGTATTGGTACAAGCAGAAAGCTAAGAAGCCACCGGAGCTCATGTTTGTC	MYWYKQKAKKPPELMFV	TACAGCTATGAGAAACTC	YSYEKL
Pat726	KW11	AACTGGTTCCACGTTC	TCRbeta	tig00000003_AACTGGTTCCACGTTC	865	196	1	GACGCTGGAGTCACCCAAAGTCCCACACACCTGATCAAAACGAGAGGACAGCAAGTGACTCTGAGATGCTCTCCTAAGTCTGGGCATGACACTGTGTCCTGGTACCAACAGGCCCTGGGTCAGGGGCCCCAGTTTATCTTTCAGTATTATGAGGAGGAAGAGAGACAGAGAGGCAACTTCCCTGATCGATTCTCAGGTCACCAGTTCCCTAACTATAGCTCTGAGCTGAATGTGAACGCCTTGTTGCTGGGGGACTCGGCCCTCTATCTCTGTGCCAGCAGCTTGGTTCCCAGCGAAGAGACCCAGTACTTCGGGCCAGGCACGCGGCTCCTGGTGCTCG	DAGVTQSPTHLIKTRGQQVTLRCSPKSGHDTVSWYQQALGQGPQFIFQYYEEEERQRGNFPDRFSGHQFPNYSSELNVNALLLGDSALYLCASSLVPSEETQYFGPGTRLLVL	TRB	F	T	F	T	F	T	TRBV5-6*01		TRBJ2-5*01	GACGCTGGAGTCACCCAAAGTCCCACACACCTGATCAAAACGAGAGGACAGCAAGTGACTCTGAGATGCTCTCCTAAGTCTGGGCATGACACTGTGTCCTGGTACCAACAGGCCCTGGGTCAGGGGCCCCAGTTTATCTTTCAGTATTATGAGGAGGAAGAGAGACAGAGAGGCAACTTCCCTGATCGATTCTCAGGTCACCAGTTCCCTAACTATAGCTCTGAGCTGAATGTGAACGCCTTGTTGCTGGGGGACTCGGCCCTCTATCTCTGTGCCAGCAGCTTGGTTCCCAGCGAAGAGACCCAGTACTTCGGGCCAGGCACGCGGCTCCTGGTGCTCG	GACGCTGGAGTCACCCAAAGTCCCACACACCTGATCAAAACGAGAGGACAGCAAGTGACTCTGAGATGCTCTCCTAAGTCTGGGCATGACACTGTGTCCTGGTACCAACAGGCCCTGGGTCAGGGGCCCCAGTTTATCTTTCAGTATTATGAGGAGGAAGAGAGACAGAGAGGCAACTTCCCTGATCGATTCTCAGGTCACCAGTTCCCTAACTATAGCTCTGAGCTGAATGTGAACGCCTTGTTGCTGGGGGACTCGGCCCTCTATCTCTGTGCCAGCAGCTTGGNNNNNNNNNAAGAGACCCAGTACTTCGGGCCAGGCACGCGGCTCCTGGTGCTCG	DAGVTQSPTHLIKTRGQQVTLRCSPKSGHDTVSWYQQALGQGPQFIFQYYEEEERQRGNFPDRFSGHQFPNYSSELNVNALLLGDSALYLCASSLVPSEETQYFGPGTRLLVL	DAGVTQSPTHLIKTRGQQVTLRCSPKSGHDTVSWYQQALGQGPQFIFQYYEEEERQRGNFPDRFSGHQFPNYSSELNVNALLLGDSALYLCASSLXXXXETQYFGPGTRLLVL	1	286			296	340	GACGCTGGAGTCACCCAAAGTCCCACACACCTGATCAAAACGAGAGGACAGCAAGTGACTCTGAGATGCTCTCCTAAGTCTGGGCATGACACTGTGTCCTGGTACCAACAGGCCCTGGGTCAGGGGCCCCAGTTTATCTTTCAGTATTATGAGGAGGAAGAGAGACAGAGAGGCAACTTCCCTGATCGATTCTCAGGTCACCAGTTCCCTAACTATAGCTCTGAGCTGAATGTGAACGCCTTGTTGCTGGGGGACTCGGCCCTCTATCTCTGTGCCAGCAGCTTGG	DAGVTQSPTHLIKTRGQQVTLRCSPKSGHDTVSWYQQALGQGPQFIFQYYEEEERQRGNFPDRFSGHQFPNYSSELNVNALLLGDSALYLCASSL	GACGCTGGAGTCACCCAAAGTCCCACACACCTGATCAAAACGAGAGGACAGCAAGTGACTCTGAGATGCTCTCCTAAGTCTGGGCATGACACTGTGTCCTGGTACCAACAGGCCCTGGGTCAGGGGCCCCAGTTTATCTTTCAGTATTATGAGGAGGAAGAGAGACAGAGAGGCAACTTCCCTGATCGATTCTCAGGTCACCAGTTCCCTAACTATAGCTCTGAGCTGAATGTGAACGCCTTGTTGCTGGGGGACTCGGCCCTCTATCTCTGTGCCAGCAGCTTGG	DAGVTQSPTHLIKTRGQQVTLRCSPKSGHDTVSWYQQALGQGPQFIFQYYEEEERQRGNFPDRFSGHQFPNYSSELNVNALLLGDSALYLCASSL					AAGAGACCCAGTACTTCGGGCCAGGCACGCGGCTCCTGGTGCTCG	ETQYFGPGTRLLVL	AAGAGACCCAGTACTTCGGGCCAGGCACGCGGCTCCTGGTGCTCG	ETQYFGPGTRLLVL	GACGCTGGAGTCACCCAAAGTCCCACACACCTGATCAAAACGAGAGGACAGCAAGTGACTCTGAGATGCTCTCCTAAG	DAGVTQSPTHLIKTRGQQVTLRCSPK	TCTGGGCATGACACT	SGHDT	GTGTCCTGGTACCAACAGGCCCTGGGTCAGGGGCCCCAGTTTATCTTTCAG	VSWYQQALGQGPQFIFQ	TATTATGAGGAGGAAGAG	YYEEEE
Pat726	IW9	AATCCAGAGTCCGGTC	TCRbeta	tig00000013_AATCCAGAGTCCGGTC	831	269	1	GACACAGCTGTTTCCCAGACTCCAAAATACCTGGTCACACAGATGGGAAACGACAAGTCCATTAAATGTGAACAAAATCTGGGCCATGATACTATGTATTGGTATAAACAGGACTCTAAGAAATTTCTGAAGATAATGTTTAGCTACAATAATAAGGAGCTCATTATAAATGAAACAGTTCCAAATCGCTTCTCACCTAAATCTCCAGACAAAGCTCACTTAAATCTTCACATCAATTCCCTGGAGCTTGGTGACTCTGCTGTGTATTTCTGTGCCAGCAGCCAAGTTAGGGGTGATCTGAACACTGAAGCTTTCTTTGGACAAGGCACCAGACTCACAGTTGTAG	DTAVSQTPKYLVTQMGNDKSIKCEQNLGHDTMYWYKQDSKKFLKIMFSYNNKELIINETVPNRFSPKSPDKAHLNLHINSLELGDSAVYFCASSQVRGDLNTEAFFGQGTRLTVV	TRB	F	T	F	T	F	T	TRBV3-1*01	TRBD1*01	TRBJ1-1*01	GACACAGCTGTTTCCCAGACTCCAAAATACCTGGTCACACAGATGGGAAACGACAAGTCCATTAAATGTGAACAAAATCTGGGCCATGATACTATGTATTGGTATAAACAGGACTCTAAGAAATTTCTGAAGATAATGTTTAGCTACAATAATAAGGAGCTCATTATAAATGAAACAGTTCCAAATCGCTTCTCACCTAAATCTCCAGACAAAGCTCACTTAAATCTTCACATCAATTCCCTGGAGCTTGGTGACTCTGCTGTGTATTTCTGTGCCAGCAGCCAAGTTAGGGGTGATCTGAACACTGAAGCTTTCTTTGGACAAGGCACCAGACTCACAGTTGTAG	GACACAGCTGTTTCCCAGACTCCAAAATACCTGGTCACACAGATGGGAAACGACAAGTCCATTAAATGTGAACAAAATCTGGGCCATGATACTATGTATTGGTATAAACAGGACTCTAAGAAATTTCTGAAGATAATGTTTAGCTACAATAATAAGGAGCTCATTATAAATGAAACAGTTCCAAATCGCTTCTCACCTAAATCTCCAGACAAAGCTCACTTAAATCTTCACATCAATTCCCTGGAGCTTGGTGACTCTGCTGTGTATTTCTGTGCCAGCAGCCAAGNNAGGGGNNNNNTGAACACTGAAGCTTTCTTTGGACAAGGCACCAGACTCACAGTTGTAG	DTAVSQTPKYLVTQMGNDKSIKCEQNLGHDTMYWYKQDSKKFLKIMFSYNNKELIINETVPNRFSPKSPDKAHLNLHINSLELGDSAVYFCASSQVRGDLNTEAFFGQGTRLTVV	DTAVSQTPKYLVTQMGNDKSIKCEQNLGHDTMYWYKQDSKKFLKIMFSYNNKELIINETVPNRFSPKSPDKAHLNLHINSLELGDSAVYFCASSQXRGXXNTEAFFGQGTRLTVV	1	286	289	293	299	346	GACACAGCTGTTTCCCAGACTCCAAAATACCTGGTCACACAGATGGGAAACGACAAGTCCATTAAATGTGAACAAAATCTGGGCCATGATACTATGTATTGGTATAAACAGGACTCTAAGAAATTTCTGAAGATAATGTTTAGCTACAATAATAAGGAGCTCATTATAAATGAAACAGTTCCAAATCGCTTCTCACCTAAATCTCCAGACAAAGCTCACTTAAATCTTCACATCAATTCCCTGGAGCTTGGTGACTCTGCTGTGTATTTCTGTGCCAGCAGCCAAG	DTAVSQTPKYLVTQMGNDKSIKCEQNLGHDTMYWYKQDSKKFLKIMFSYNNKELIINETVPNRFSPKSPDKAHLNLHINSLELGDSAVYFCASSQ	GACACAGCTGTTTCCCAGACTCCAAAATACCTGGTCACACAGATGGGAAACGACAAGTCCATTAAATGTGAACAAAATCTGGGCCATGATACTATGTATTGGTATAAACAGGACTCTAAGAAATTTCTGAAGATAATGTTTAGCTACAATAATAAGGAGCTCATTATAAATGAAACAGTTCCAAATCGCTTCTCACCTAAATCTCCAGACAAAGCTCACTTAAATCTTCACATCAATTCCCTGGAGCTTGGTGACTCTGCTGTGTATTTCTGTGCCAGCAGCCAAG	DTAVSQTPKYLVTQMGNDKSIKCEQNLGHDTMYWYKQDSKKFLKIMFSYNNKELIINETVPNRFSPKSPDKAHLNLHINSLELGDSAVYFCASSQ	AGGGG	RG	AGGGG	RG	TGAACACTGAAGCTTTCTTTGGACAAGGCACCAGACTCACAGTTGTAG	NTEAFFGQGTRLTVV	TGAACACTGAAGCTTTCTTTGGACAAGGCACCAGACTCACAGTTGTAG	NTEAFFGQGTRLTVV	GACACAGCTGTTTCCCAGACTCCAAAATACCTGGTCACACAGATGGGAAACGACAAGTCCATTAAATGTGAACAAAAT	DTAVSQTPKYLVTQMGNDKSIKCEQN	CTGGGCCATGATACT	LGHDT	ATGTATTGGTATAAACAGGACTCTAAGAAATTTCTGAAGATAATGTTTAGC	MYWYKQDSKKFLKIMFS	TACAATAATAAGGAGCTC	YNNKEL
Pat726	KW11	AATCCAGAGTTCCACA	TCRbeta	tig00000009_AATCCAGAGTTCCACA	1030	116	1	ACTGCTGGGATCACCCAGGCACCAACATCTCAGATCCTGGCAGCAGGACGGAGCATGACACTGAGATGTACCCAGGATATGAGACATAATGCCATGTACTGGTATAGACAAGATCTAGGACTGGGGCTAAGGCTCATCCATTATTCAAATACTGCAGGTACCACTGGCAAAGGAGAAGTCCCTGATGGTTATAGTGTCTCCAGAGCAAACACAGATGATTTCCCCCTCACGTTGGCGTCTGCTGTACCCTCTCAGACATCTGTGTACTTCTGTGCCAGCAGTGGAGACCCGTTTAACATTCAGTACTTCGGCGCCGGGACCCGGCTCTCAGTGCTGG	AGITQAPTSQILAAGRSMTLRCTQDMRHNAMYWYRQDLGLGLRLIHYSNTAGTTGKGEVPDGYSVSRANTDDFPLTLASAVPSQTSVYFCASSGDPFNIQYFGAGTRLSVL	TRB	F	T	F	T	F	T	TRBV6-4*02		TRBJ2-4*01	ACTGCTGGGATCACCCAGGCACCAACATCTCAGATCCTGGCAGCAGGACGGAGCATGACACTGAGATGTACCCAGGATATGAGACATAATGCCATGTACTGGTATAGACAAGATCTAGGACTGGGGCTAAGGCTCATCCATTATTCAAATACTGCAGGTACCACTGGCAAAGGAGAAGTCCCTGATGGTTATAGTGTCTCCAGAGCAAACACAGATGATTTCCCCCTCACGTTGGCGTCTGCTGTACCCTCTCAGACATCTGTGTACTTCTGTGCCAGCAGTGGAGACCCGTTTAACATTCAGTACTTCGGCGCCGGGACCCGGCTCTCAGTGCTGG	ACTGCTGGGATCACCCAGGCACCAACATCTCAGATCCTGGCAGCAGGACGGAGCATGACACTGAGATGTACCCAGGATATGAGACATAATGCCATGTACTGGTATAGACAAGATCTAGGACTGGGGCTAAGGCTCATCCATTATTCAAATACTGCAGGTACCACTGGCAAAGGAGAAGTCCCTGATGGTTATAGTGTCTCCAGAGCAAACACAGATGATTTCCCCCTCACGTTGGCGTCTGCTGTACCCTCTCAGACATCTGTGTACTTCTGTGCCAGCAGTGNNNNNNNNNNNAACATTCAGTACTTCGGCGCCGGGACCCGGCTCTCAGTGCTGG	TAGITQAPTSQILAAGRSMTLRCTQDMRHNAMYWYRQDLGLGLRLIHYSNTAGTTGKGEVPDGYSVSRANTDDFPLTLASAVPSQTSVYFCASSGDPFNIQYFGAGTRLSVL	TAGITQAPTSQILAAGRSMTLRCTQDMRHNAMYWYRQDLGLGLRLIHYSNTAGTTGKGEVPDGYSVSRANTDDFPLTLASAVPSQTSVYFCASSXXXXNIQYFGAGTRLSVL	1	283			295	337	ACTGCTGGGATCACCCAGGCACCAACATCTCAGATCCTGGCAGCAGGACGGAGCATGACACTGAGATGTACCCAGGATATGAGACATAATGCCATGTACTGGTATAGACAAGATCTAGGACTGGGGCTAAGGCTCATCCATTATTCAAATACTGCAGGTACCACTGGCAAAGGAGAAGTCCCTGATGGTTATAGTGTCTCCAGAGCAAACACAGATGATTTCCCCCTCACGTTGGCGTCTGCTGTACCCTCTCAGACATCTGTGTACTTCTGTGCCAGCAGTG	TAGITQAPTSQILAAGRSMTLRCTQDMRHNAMYWYRQDLGLGLRLIHYSNTAGTTGKGEVPDGYSVSRANTDDFPLTLASAVPSQTSVYFCASS	ACTGCTGGGATCACCCAGGCACCAACATCTCAGATCCTGGCAGCAGGACGGAGCATGACACTGAGATGTACCCAGGATATGAGACATAATGCCATGTACTGGTATAGACAAGATCTAGGACTGGGGCTAAGGCTCATCCATTATTCAAATACTGCAGGTACCACTGGCAAAGGAGAAGTCCCTGATGGTTATAGTGTCTCCAGAGCAAACACAGATGATTTCCCCCTCACGTTGGCGTCTGCTGTACCCTCTCAGACATCTGTGTACTTCTGTGCCAGCAGTG	TAGITQAPTSQILAAGRSMTLRCTQDMRHNAMYWYRQDLGLGLRLIHYSNTAGTTGKGEVPDGYSVSRANTDDFPLTLASAVPSQTSVYFCASS					AACATTCAGTACTTCGGCGCCGGGACCCGGCTCTCAGTGCTGG	NIQYFGAGTRLSVL	AACATTCAGTACTTCGGCGCCGGGACCCGGCTCTCAGTGCTGG	NIQYFGAGTRLSVL	ACTGCTGGGATCACCCAGGCACCAACATCTCAGATCCTGGCAGCAGGACGGAGCATGACACTGAGATGTACCCAGGAT	TAGITQAPTSQILAAGRSMTLRCTQD	ATGAGACATAATGCC	MRHNA	ATGTACTGGTATAGACAAGATCTAGGACTGGGGCTAAGGCTCATCCATTAT	MYWYRQDLGLGLRLIHY	TCAAATACTGCAGGTACC	SNTAGT
Pat726	IW9	ACAGCCGAGCTCCTTC	TCRbeta	tig00000022_ACAGCCGAGCTCCTTC	1224	134	1	AATGCTGGTGTCACTCAGACCCCAAAATTCCAGGTCCTGAAGACAGGACAGAGCATGACACTGCAGTGTGCCCAGGATATGAACCATGAATACATGTCCTGGTATCGACAAGACCCAGGCATGGGGCTGAGGCTGATTCATTACTCAGTTGGTGCTGGTATCACTGACCAAGGAGAAGTCCCCAATGGCTACAATGTCTCCAGATCAACCACAGAGGATTTCCCGCTCAGGCTGCTGTCGGCTGCTCCCTCCCAGACATCTGTGTACTTCTGTGCCAGCAGTTACTCGGGGCATGAGCAGTTCTTCGGGCCAGGGACACGGCTCACCGTGCTAG	NAGVTQTPKFQVLKTGQSMTLQCAQDMNHEYMSWYRQDPGMGLRLIHYSVGAGITDQGEVPNGYNVSRSTTEDFPLRLLSAAPSQTSVYFCASSYSGHEQFFGPGTRLTVL	TRB	F	T	F	T	F	T	TRBV6-5*01	TRBD1*01	TRBJ2-1*01	AATGCTGGTGTCACTCAGACCCCAAAATTCCAGGTCCTGAAGACAGGACAGAGCATGACACTGCAGTGTGCCCAGGATATGAACCATGAATACATGTCCTGGTATCGACAAGACCCAGGCATGGGGCTGAGGCTGATTCATTACTCAGTTGGTGCTGGTATCACTGACCAAGGAGAAGTCCCCAATGGCTACAATGTCTCCAGATCAACCACAGAGGATTTCCCGCTCAGGCTGCTGTCGGCTGCTCCCTCCCAGACATCTGTGTACTTCTGTGCCAGCAGTTACTCGGGGCATGAGCAGTTCTTCGGGCCAGGGACACGGCTCACCGTGCTAG	AATGCTGGTGTCACTCAGACCCCAAAATTCCAGGTCCTGAAGACAGGACAGAGCATGACACTGCAGTGTGCCCAGGATATGAACCATGAATACATGTCCTGGTATCGACAAGACCCAGGCATGGGGCTGAGGCTGATTCATTACTCAGTTGGTGCTGGTATCACTGACCAAGGAGAAGTCCCCAATGGCTACAATGTCTCCAGATCAACCACAGAGGATTTCCCGCTCAGGCTGCTGTCGGCTGCTCCCTCCCAGACATCTGTGTACTTCTGTGCCAGCAGTTACTCGGGGCATGAGCAGTTCTTCGGGCCAGGGACACGGCTCACCGTGCTAG	NAGVTQTPKFQVLKTGQSMTLQCAQDMNHEYMSWYRQDPGMGLRLIHYSVGAGITDQGEVPNGYNVSRSTTEDFPLRLLSAAPSQTSVYFCASSYSGHEQFFGPGTRLTVL	NAGVTQTPKFQVLKTGQSMTLQCAQDMNHEYMSWYRQDPGMGLRLIHYSVGAGITDQGEVPNGYNVSRSTTEDFPLRLLSAAPSQTSVYFCASSYSGHEQFFGPGTRLTVL	1	287	288	292	293	334	AATGCTGGTGTCACTCAGACCCCAAAATTCCAGGTCCTGAAGACAGGACAGAGCATGACACTGCAGTGTGCCCAGGATATGAACCATGAATACATGTCCTGGTATCGACAAGACCCAGGCATGGGGCTGAGGCTGATTCATTACTCAGTTGGTGCTGGTATCACTGACCAAGGAGAAGTCCCCAATGGCTACAATGTCTCCAGATCAACCACAGAGGATTTCCCGCTCAGGCTGCTGTCGGCTGCTCCCTCCCAGACATCTGTGTACTTCTGTGCCAGCAGTTACTC	NAGVTQTPKFQVLKTGQSMTLQCAQDMNHEYMSWYRQDPGMGLRLIHYSVGAGITDQGEVPNGYNVSRSTTEDFPLRLLSAAPSQTSVYFCASSYS	AATGCTGGTGTCACTCAGACCCCAAAATTCCAGGTCCTGAAGACAGGACAGAGCATGACACTGCAGTGTGCCCAGGATATGAACCATGAATACATGTCCTGGTATCGACAAGACCCAGGCATGGGGCTGAGGCTGATTCATTACTCAGTTGGTGCTGGTATCACTGACCAAGGAGAAGTCCCCAATGGCTACAATGTCTCCAGATCAACCACAGAGGATTTCCCGCTCAGGCTGCTGTCGGCTGCTCCCTCCCAGACATCTGTGTACTTCTGTGCCAGCAGTTACTC	NAGVTQTPKFQVLKTGQSMTLQCAQDMNHEYMSWYRQDPGMGLRLIHYSVGAGITDQGEVPNGYNVSRSTTEDFPLRLLSAAPSQTSVYFCASSYS	GGGGC	G	GGGGC	G	ATGAGCAGTTCTTCGGGCCAGGGACACGGCTCACCGTGCTAG	EQFFGPGTRLTVL	ATGAGCAGTTCTTCGGGCCAGGGACACGGCTCACCGTGCTAG	EQFFGPGTRLTVL	AATGCTGGTGTCACTCAGACCCCAAAATTCCAGGTCCTGAAGACAGGACAGAGCATGACACTGCAGTGTGCCCAGGAT	NAGVTQTPKFQVLKTGQSMTLQCAQD	ATGAACCATGAATAC	MNHEY	ATGTCCTGGTATCGACAAGACCCAGGCATGGGGCTGAGGCTGATTCATTAC	MSWYRQDPGMGLRLIHY	TCAGTTGGTGCTGGTATC	SVGAGI
Pat726	KW11	ACAGCTATCGCCGTGA	TCRbeta	tig00000252_ACAGCTATCGCCGTGA	569	5	1	AGTGCTGTCATCTCTCAAAAGCCAAGCAGGGATATATGTCAACGTGGAACCTCCCTGACGATCCAGTGTCAAGTCGATAGCCAAGTCACCATGATGTTCTGGTACCGTCAGCAACCTGGACAGAGCCTGACACTGATCGCAACTGCAAATCAGGGCTCTGAGGCCACATATGAGAGTGGATTTGTCATTGACAAGTTTCCCATCAGCCGCCCAAACCTAACATTCTCAACTCTGACTGTGAGCAACATGAGCCCTGAAGACAGCAGCATATATCTCTGCAGCGTTGTAGGACAGGGTAATAATGAGCAGTTCTTCGGGCCAGGGACACGGCTCACCGTGCTAG	SAVISQKPSRDICQRGTSLTIQCQVDSQVTMMFWYRQQPGQSLTLIATANQGSEATYESGFVIDKFPISRPNLTFSTLTVSNMSPEDSSIYLCSVVGQGNNEQFFGPGTRLTVL	TRB	F	T	F	T	F	T	TRBV29-1*01	TRBD1*01	TRBJ2-1*01	AGTGCTGTCATCTCTCAAAAGCCAAGCAGGGATATATGTCAACGTGGAACCTCCCTGACGATCCAGTGTCAAGTCGATAGCCAAGTCACCATGATGTTCTGGTACCGTCAGCAACCTGGACAGAGCCTGACACTGATCGCAACTGCAAATCAGGGCTCTGAGGCCACATATGAGAGTGGATTTGTCATTGACAAGTTTCCCATCAGCCGCCCAAACCTAACATTCTCAACTCTGACTGTGAGCAACATGAGCCCTGAAGACAGCAGCATATATCTCTGCAGCGTTGTAGGACAGGGTAATAATGAGCAGTTCTTCGGGCCAGGGACACGGCTCACCGTGCTAG	AGTGCTGTCATCTCTCAAAAGCCAAGCAGGGATATCTGTCAACGTGGAACCTCCCTGACGATCCAGTGTCAAGTCGATAGCCAAGTCACCATGATGTTCTGGTACCGTCAGCAACCTGGACAGAGCCTGACACTGATCGCAACTGCAAATCAGGGCTCTGAGGCCACATATGAGAGTGGATTTGTCATTGACAAGTTTCCCATCAGCCGCCCAAACCTAACATTCTCAACTCTGACTGTGAGCAACATGAGCCCTGAAGACAGCAGCATATATCTCTGCAGCGTTGAAGGACAGGGNNNNAATGAGCAGTTCTTCGGGCCAGGGACACGGCTCACCGTGCTAG	SAVISQKPSRDICQRGTSLTIQCQVDSQVTMMFWYRQQPGQSLTLIATANQGSEATYESGFVIDKFPISRPNLTFSTLTVSNMSPEDSSIYLCSVVGQGNNEQFFGPGTRLTVL	SAVISQKPSRDICQRGTSLTIQCQVDSQVTMMFWYRQQPGQSLTLIATANQGSEATYESGFVIDKFPISRPNLTFSTLTVSNMSPEDSSIYLCSVEGQGXNEQFFGPGTRLTVL	1	289	290	296	301	343	AGTGCTGTCATCTCTCAAAAGCCAAGCAGGGATATATGTCAACGTGGAACCTCCCTGACGATCCAGTGTCAAGTCGATAGCCAAGTCACCATGATGTTCTGGTACCGTCAGCAACCTGGACAGAGCCTGACACTGATCGCAACTGCAAATCAGGGCTCTGAGGCCACATATGAGAGTGGATTTGTCATTGACAAGTTTCCCATCAGCCGCCCAAACCTAACATTCTCAACTCTGACTGTGAGCAACATGAGCCCTGAAGACAGCAGCATATATCTCTGCAGCGTTGTAG	SAVISQKPSRDICQRGTSLTIQCQVDSQVTMMFWYRQQPGQSLTLIATANQGSEATYESGFVIDKFPISRPNLTFSTLTVSNMSPEDSSIYLCSVV	AGTGCTGTCATCTCTCAAAAGCCAAGCAGGGATATCTGTCAACGTGGAACCTCCCTGACGATCCAGTGTCAAGTCGATAGCCAAGTCACCATGATGTTCTGGTACCGTCAGCAACCTGGACAGAGCCTGACACTGATCGCAACTGCAAATCAGGGCTCTGAGGCCACATATGAGAGTGGATTTGTCATTGACAAGTTTCCCATCAGCCGCCCAAACCTAACATTCTCAACTCTGACTGTGAGCAACATGAGCCCTGAAGACAGCAGCATATATCTCTGCAGCGTTGAAG	SAVISQKPSRDICQRGTSLTIQCQVDSQVTMMFWYRQQPGQSLTLIATANQGSEATYESGFVIDKFPISRPNLTFSTLTVSNMSPEDSSIYLCSVE	GACAGGG	QG	GACAGGG	QG	AATGAGCAGTTCTTCGGGCCAGGGACACGGCTCACCGTGCTAG	NEQFFGPGTRLTVL	AATGAGCAGTTCTTCGGGCCAGGGACACGGCTCACCGTGCTAG	NEQFFGPGTRLTVL	AGTGCTGTCATCTCTCAAAAGCCAAGCAGGGATATATGTCAACGTGGAACCTCCCTGACGATCCAGTGTCAAGTCGAT	SAVISQKPSRDICQRGTSLTIQCQVD	AGCCAAGTCACCATG	SQVTM	ATGTTCTGGTACCGTCAGCAACCTGGACAGAGCCTGACACTGATCGCAACT	MFWYRQQPGQSLTLIAT	GCAAATCAGGGCTCTGAGGCC	ANQGSEA
Pat726	KW11	ACCAGTAGTCCTGCTT	TCRbeta	tig00000004_ACCAGTAGTCCTGCTT	952	501	1	AAGGCTGGAGTCACTCAAACTCCAAGATATCTGATCAAAACGAGAGGACAGCAAGTGACACTGAGCTGCTCCCCTATCTCTGGGCATAGGAGTGTATCCTGGTACCAACAGACCCCAGGACAGGGCCTTCAGTTCCTCTTTGAATACTTCAGTGAGACACAGAGAAACAAAGGAAACTTCCCTGGTCGATTCTCAGGGCGCCAGTTCTCTAACTCTCGCTCTGAGATGAATGTGAGCACCTTGGAGCTGGGGGACTCGGCCCTTTATCTTTGCGCCAGCAGCTTGTCCGGGGCGAATGGCTACACCTTCGGTTCGGGGACCAGGTTAACCGTTGTAG	KAGVTQTPRYLIKTRGQQVTLSCSPISGHRSVSWYQQTPGQGLQFLFEYFSETQRNKGNFPGRFSGRQFSNSRSEMNVSTLELGDSALYLCASSLSGANGYTFGSGTRLTVV	TRB	F	T	F	T	F	T	TRBV5-1*01	TRBD1*01	TRBJ1-2*01	AAGGCTGGAGTCACTCAAACTCCAAGATATCTGATCAAAACGAGAGGACAGCAAGTGACACTGAGCTGCTCCCCTATCTCTGGGCATAGGAGTGTATCCTGGTACCAACAGACCCCAGGACAGGGCCTTCAGTTCCTCTTTGAATACTTCAGTGAGACACAGAGAAACAAAGGAAACTTCCCTGGTCGATTCTCAGGGCGCCAGTTCTCTAACTCTCGCTCTGAGATGAATGTGAGCACCTTGGAGCTGGGGGACTCGGCCCTTTATCTTTGCGCCAGCAGCTTGTCCGGGGCGAATGGCTACACCTTCGGTTCGGGGACCAGGTTAACCGTTGTAG	AAGGCTGGAGTCACTCAAACTCCAAGATATCTGATCAAAACGAGAGGACAGCAAGTGACACTGAGCTGCTCCCCTATCTCTGGGCATAGGAGTGTATCCTGGTACCAACAGACCCCAGGACAGGGCCTTCAGTTCCTCTTTGAATACTTCAGTGAGACACAGAGAAACAAAGGAAACTTCCCTGGTCGATTCTCAGGGCGCCAGTTCTCTAACTCTCGCTCTGAGATGAATGTGAGCACCTTGGAGCTGGGGGACTCGGCCCTTTATCTTTGCGCCAGCAGCTTGNNNGGGGCNNATGGCTACACCTTCGGTTCGGGGACCAGGTTAACCGTTGTAG	KAGVTQTPRYLIKTRGQQVTLSCSPISGHRSVSWYQQTPGQGLQFLFEYFSETQRNKGNFPGRFSGRQFSNSRSEMNVSTLELGDSALYLCASSLSGANGYTFGSGTRLTVV	KAGVTQTPRYLIKTRGQQVTLSCSPISGHRSVSWYQQTPGQGLQFLFEYFSETQRNKGNFPGRFSGRQFSNSRSEMNVSTLELGDSALYLCASSLXGAXGYTFGSGTRLTVV	1	285	289	293	296	337	AAGGCTGGAGTCACTCAAACTCCAAGATATCTGATCAAAACGAGAGGACAGCAAGTGACACTGAGCTGCTCCCCTATCTCTGGGCATAGGAGTGTATCCTGGTACCAACAGACCCCAGGACAGGGCCTTCAGTTCCTCTTTGAATACTTCAGTGAGACACAGAGAAACAAAGGAAACTTCCCTGGTCGATTCTCAGGGCGCCAGTTCTCTAACTCTCGCTCTGAGATGAATGTGAGCACCTTGGAGCTGGGGGACTCGGCCCTTTATCTTTGCGCCAGCAGCTTG	KAGVTQTPRYLIKTRGQQVTLSCSPISGHRSVSWYQQTPGQGLQFLFEYFSETQRNKGNFPGRFSGRQFSNSRSEMNVSTLELGDSALYLCASSL	AAGGCTGGAGTCACTCAAACTCCAAGATATCTGATCAAAACGAGAGGACAGCAAGTGACACTGAGCTGCTCCCCTATCTCTGGGCATAGGAGTGTATCCTGGTACCAACAGACCCCAGGACAGGGCCTTCAGTTCCTCTTTGAATACTTCAGTGAGACACAGAGAAACAAAGGAAACTTCCCTGGTCGATTCTCAGGGCGCCAGTTCTCTAACTCTCGCTCTGAGATGAATGTGAGCACCTTGGAGCTGGGGGACTCGGCCCTTTATCTTTGCGCCAGCAGCTTG	KAGVTQTPRYLIKTRGQQVTLSCSPISGHRSVSWYQQTPGQGLQFLFEYFSETQRNKGNFPGRFSGRQFSNSRSEMNVSTLELGDSALYLCASSL	GGGGC	GA	GGGGC	GA	ATGGCTACACCTTCGGTTCGGGGACCAGGTTAACCGTTGTAG	GYTFGSGTRLTVV	ATGGCTACACCTTCGGTTCGGGGACCAGGTTAACCGTTGTAG	GYTFGSGTRLTVV	AAGGCTGGAGTCACTCAAACTCCAAGATATCTGATCAAAACGAGAGGACAGCAAGTGACACTGAGCTGCTCCCCTATC	KAGVTQTPRYLIKTRGQQVTLSCSPI	TCTGGGCATAGGAGT	SGHRS	GTATCCTGGTACCAACAGACCCCAGGACAGGGCCTTCAGTTCCTCTTTGAA	VSWYQQTPGQGLQFLFE	TACTTCAGTGAGACACAG	YFSETQ
Pat726	KW11	ACGAGGATCATGTCCC	TCRbeta	tig00000001_ACGAGGATCATGTCCC	1002	489	1	AAGGCTGGAGTCACTCAAACTCCAAGATATCTGATCAAAACGAGAGGACAGCAAGTGACACTGAGCTGCTCCCCTACCTCTGGGCATAGGAGTGTATCCTGGTACCAACAGACCCCAGGACAGGGCCTTCAGTTCCTCTTTGAATACTTCAGTGAGACACAGAGAAACAAAGGAAACTTCCCTGGTCGATTCTCAGGGCGCCAGTTCTCTAACTCTCGCTCTGAGATGAATGTGAGCACCTTGGAGCTGGGGGACTCGGCCCTTTATCTTTGCGCCAGCGCCGATAGGGGGGGGAGCACTGAAGCTTTCTTTGGACAAGGCACCAGACTCACAGTTGTAG	KAGVTQTPRYLIKTRGQQVTLSCSPTSGHRSVSWYQQTPGQGLQFLFEYFSETQRNKGNFPGRFSGRQFSNSRSEMNVSTLELGDSALYLCASADRGGSTEAFFGQGTRLTVV	TRB	F	T	F	T	F	T	TRBV5-1*01	TRBD2*01	TRBJ1-1*01	AAGGCTGGAGTCACTCAAACTCCAAGATATCTGATCAAAACGAGAGGACAGCAAGTGACACTGAGCTGCTCCCCTACCTCTGGGCATAGGAGTGTATCCTGGTACCAACAGACCCCAGGACAGGGCCTTCAGTTCCTCTTTGAATACTTCAGTGAGACACAGAGAAACAAAGGAAACTTCCCTGGTCGATTCTCAGGGCGCCAGTTCTCTAACTCTCGCTCTGAGATGAATGTGAGCACCTTGGAGCTGGGGGACTCGGCCCTTTATCTTTGCGCCAGCGCCGATAGGGGGGGGAGCACTGAAGCTTTCTTTGGACAAGGCACCAGACTCACAGTTGTAG	AAGGCTGGAGTCACTCAAACTCCAAGATATCTGATCAAAACGAGAGGACAGCAAGTGACACTGAGCTGCTCCCCTATCTCTGGGCATAGGAGTGTATCCTGGTACCAACAGACCCCAGGACAGGGCCTTCAGTTCCTCTTTGAATACTTCAGTGAGACACAGAGAAACAAAGGAAACTTCCCTGGTCGATTCTCAGGGCGCCAGTTCTCTAACTCTCGCTCTGAGATGAATGTGAGCACCTTGGAGCTGGGGGACTCGGCCCTTTATCTTTGCGCCAGCNNNNNTAGCGGGGGGNNCACTGAAGCTTTCTTTGGACAAGGCACCAGACTCACAGTTGTAG	KAGVTQTPRYLIKTRGQQVTLSCSPTSGHRSVSWYQQTPGQGLQFLFEYFSETQRNKGNFPGRFSGRQFSNSRSEMNVSTLELGDSALYLCASADRGGSTEAFFGQGTRLTVV	KAGVTQTPRYLIKTRGQQVTLSCSPISGHRSVSWYQQTPGQGLQFLFEYFSETQRNKGNFPGRFSGRQFSNSRSEMNVSTLELGDSALYLCASXXSGGXTEAFFGQGTRLTVV	1	279	285	294	297	340	AAGGCTGGAGTCACTCAAACTCCAAGATATCTGATCAAAACGAGAGGACAGCAAGTGACACTGAGCTGCTCCCCTACCTCTGGGCATAGGAGTGTATCCTGGTACCAACAGACCCCAGGACAGGGCCTTCAGTTCCTCTTTGAATACTTCAGTGAGACACAGAGAAACAAAGGAAACTTCCCTGGTCGATTCTCAGGGCGCCAGTTCTCTAACTCTCGCTCTGAGATGAATGTGAGCACCTTGGAGCTGGGGGACTCGGCCCTTTATCTTTGCGCCAGC	KAGVTQTPRYLIKTRGQQVTLSCSPTSGHRSVSWYQQTPGQGLQFLFEYFSETQRNKGNFPGRFSGRQFSNSRSEMNVSTLELGDSALYLCAS	AAGGCTGGAGTCACTCAAACTCCAAGATATCTGATCAAAACGAGAGGACAGCAAGTGACACTGAGCTGCTCCCCTATCTCTGGGCATAGGAGTGTATCCTGGTACCAACAGACCCCAGGACAGGGCCTTCAGTTCCTCTTTGAATACTTCAGTGAGACACAGAGAAACAAAGGAAACTTCCCTGGTCGATTCTCAGGGCGCCAGTTCTCTAACTCTCGCTCTGAGATGAATGTGAGCACCTTGGAGCTGGGGGACTCGGCCCTTTATCTTTGCGCCAGC	KAGVTQTPRYLIKTRGQQVTLSCSPISGHRSVSWYQQTPGQGLQFLFEYFSETQRNKGNFPGRFSGRQFSNSRSEMNVSTLELGDSALYLCAS	TAGGGGGGGG	RGG	TAGCGGGGGG	SGG	CACTGAAGCTTTCTTTGGACAAGGCACCAGACTCACAGTTGTAG	TEAFFGQGTRLTVV	CACTGAAGCTTTCTTTGGACAAGGCACCAGACTCACAGTTGTAG	TEAFFGQGTRLTVV	AAGGCTGGAGTCACTCAAACTCCAAGATATCTGATCAAAACGAGAGGACAGCAAGTGACACTGAGCTGCTCCCCTACC	KAGVTQTPRYLIKTRGQQVTLSCSPT	TCTGGGCATAGGAGT	SGHRS	GTATCCTGGTACCAACAGACCCCAGGACAGGGCCTTCAGTTCCTCTTTGAA	VSWYQQTPGQGLQFLFE	TACTTCAGTGAGACACAG	YFSETQ
Pat726	IW9	ACGATGTCAGTCGATT	TCRbeta	tig00000002_ACGATGTCAGTCGATT	914	501	1	GATACTGGAGTCTCCCAGGACCCCAGACACAAGATCACAAAGAGGGGACAGAATGTAACTTTCAGGTGTGATCCAATTTCTGAACACAACCGCCTTTATTGGTACCGACAGACCCTGGGGCAGGGCCCAGAGTTTCTGACTTACTTCCAGAATGAAGCTCAACTAGAAAAATCAAGGCTGCTCAGTGATCGGTTCTCTGCAGGGAGGCCTAAGGGATCTTTCTCCACCTTGGAGATCCAGCGCACAGAGCAGGGGGACTCGGCCATGTATCTCTGTGCCAGCAGAGGAGGAGGCACTGAAGCTTTCTTTGGACAAGGCACCAGACTCACAGTTGTAG	DTGVSQDPRHKITKRGQNVTFRCDPISEHNRLYWYRQTLGQGPEFLTYFQNEAQLEKSRLLSDRFSAGRPKGSFSTLEIQRTEQGDSAMYLCASRGGGTEAFFGQGTRLTVV	TRB	F	T	F	T	F	T	TRBV7-9*03	TRBD2*02	TRBJ1-1*01	GATACTGGAGTCTCCCAGGACCCCAGACACAAGATCACAAAGAGGGGACAGAATGTAACTTTCAGGTGTGATCCAATTTCTGAACACAACCGCCTTTATTGGTACCGACAGACCCTGGGGCAGGGCCCAGAGTTTCTGACTTACTTCCAGAATGAAGCTCAACTAGAAAAATCAAGGCTGCTCAGTGATCGGTTCTCTGCAGGGAGGCCTAAGGGATCTTTCTCCACCTTGGAGATCCAGCGCACAGAGCAGGGGGACTCGGCCATGTATCTCTGTGCCAGCAGAGGAGGAGGCACTGAAGCTTTCTTTGGACAAGGCACCAGACTCACAGTTGTAG	GATACTGGAGTCTCCCAGGACCCCAGACACAAGATCACAAAGAGGGGACAGAATGTAACTTTCAGGTGTGATCCAATTTCTGAACACAACCGCCTTTATTGGTACCGACAGACCCTGGGGCAGGGCCCAGAGTTTCTGACTTACTTCCAGAATGAAGCTCAACTAGAAAAATCAAGGCTGCTCAGTGATCGGTTCTCTGCAGAGAGGCCTAAGGGATCTTTCTCCACCTTGGAGATCCAGCGCACAGAGCAGGGGGACTCGGCCATGTATCTCTGTGCCAGCAGNGGAGGNNNCACTGAAGCTTTCTTTGGACAAGGCACCAGACTCACAGTTGTAG	DTGVSQDPRHKITKRGQNVTFRCDPISEHNRLYWYRQTLGQGPEFLTYFQNEAQLEKSRLLSDRFSAGRPKGSFSTLEIQRTEQGDSAMYLCASRGGGTEAFFGQGTRLTVV	DTGVSQDPRHKITKRGQNVTFRCDPISEHNRLYWYRQTLGQGPEFLTYFQNEAQLEKSRLLSDRFSAERPKGSFSTLEIQRTEQGDSAMYLCASXGGXTEAFFGQGTRLTVV	1	284	286	290	294	337	GATACTGGAGTCTCCCAGGACCCCAGACACAAGATCACAAAGAGGGGACAGAATGTAACTTTCAGGTGTGATCCAATTTCTGAACACAACCGCCTTTATTGGTACCGACAGACCCTGGGGCAGGGCCCAGAGTTTCTGACTTACTTCCAGAATGAAGCTCAACTAGAAAAATCAAGGCTGCTCAGTGATCGGTTCTCTGCAGGGAGGCCTAAGGGATCTTTCTCCACCTTGGAGATCCAGCGCACAGAGCAGGGGGACTCGGCCATGTATCTCTGTGCCAGCAG	DTGVSQDPRHKITKRGQNVTFRCDPISEHNRLYWYRQTLGQGPEFLTYFQNEAQLEKSRLLSDRFSAGRPKGSFSTLEIQRTEQGDSAMYLCAS	GATACTGGAGTCTCCCAGGACCCCAGACACAAGATCACAAAGAGGGGACAGAATGTAACTTTCAGGTGTGATCCAATTTCTGAACACAACCGCCTTTATTGGTACCGACAGACCCTGGGGCAGGGCCCAGAGTTTCTGACTTACTTCCAGAATGAAGCTCAACTAGAAAAATCAAGGCTGCTCAGTGATCGGTTCTCTGCAGAGAGGCCTAAGGGATCTTTCTCCACCTTGGAGATCCAGCGCACAGAGCAGGGGGACTCGGCCATGTATCTCTGTGCCAGCAG	DTGVSQDPRHKITKRGQNVTFRCDPISEHNRLYWYRQTLGQGPEFLTYFQNEAQLEKSRLLSDRFSAERPKGSFSTLEIQRTEQGDSAMYLCAS	GGAGG	GG	GGAGG	GG	CACTGAAGCTTTCTTTGGACAAGGCACCAGACTCACAGTTGTAG	TEAFFGQGTRLTVV	CACTGAAGCTTTCTTTGGACAAGGCACCAGACTCACAGTTGTAG	TEAFFGQGTRLTVV	GATACTGGAGTCTCCCAGGACCCCAGACACAAGATCACAAAGAGGGGACAGAATGTAACTTTCAGGTGTGATCCAATT	DTGVSQDPRHKITKRGQNVTFRCDPI	TCTGAACACAACCGC	SEHNR	CTTTATTGGTACCGACAGACCCTGGGGCAGGGCCCAGAGTTTCTGACTTAC	LYWYRQTLGQGPEFLTY	TTCCAGAATGAAGCTCAA	FQNEAQ
Pat726	KW11	ACTGATGGTCCGCTGA	TCRbeta	tig00000017_ACTGATGGTCCGCTGA	963	500	1	GATACTGGAGTCTCCCAGGACCCCAGACACAAGATCACAAAGAGGGGACAGAATGTAACTTTCAGGTGTGATCCAATTTCTGAACACAACCGCCTTTATTGGTACCGACAGACCCTGGGGCAGGGCCCAGAGTTTCTGACTTACTTCCAGAATGAAGCTCAACTAGAAAAATCAAGGCTGCTCAGTGATCGGTTCTCTGCAGGGAGGCCTAAGGGATCTTTCTCCACCTTGGAGATCCAGCGCACAGAGCAGGGGGACTCGGCCATGTATCTCTGTGCCAGCAGACCCGGACAGTCCCTTAATGAAAAACTGTTTTTTGGCAGTGGAACCCAGCTCTCTGTCTTGG	DTGVSQDPRHKITKRGQNVTFRCDPISEHNRLYWYRQTLGQGPEFLTYFQNEAQLEKSRLLSDRFSAGRPKGSFSTLEIQRTEQGDSAMYLCASRPGQSLNEKLFFGSGTQLSVL	TRB	F	T	F	T	F	T	TRBV7-9*03	TRBD1*01	TRBJ1-4*01	GATACTGGAGTCTCCCAGGACCCCAGACACAAGATCACAAAGAGGGGACAGAATGTAACTTTCAGGTGTGATCCAATTTCTGAACACAACCGCCTTTATTGGTACCGACAGACCCTGGGGCAGGGCCCAGAGTTTCTGACTTACTTCCAGAATGAAGCTCAACTAGAAAAATCAAGGCTGCTCAGTGATCGGTTCTCTGCAGGGAGGCCTAAGGGATCTTTCTCCACCTTGGAGATCCAGCGCACAGAGCAGGGGGACTCGGCCATGTATCTCTGTGCCAGCAGACCCGGACAGTCCCTTAATGAAAAACTGTTTTTTGGCAGTGGAACCCAGCTCTCTGTCTTGG	GATACTGGAGTCTCCCAGGACCCCAGACACAAGATCACAAAGAGGGGACAGAATGTAACTTTCAGGTGTGATCCAATTTCTGAACACAACCGCCTTTATTGGTACCGACAGACCCTGGGGCAGGGCCCAGAGTTTCTGACTTACTTCCAGAATGAAGCTCAACTAGAAAAATCAAGGCTGCTCAGTGATCGGTTCTCTGCAGAGAGGCCTAAGGGATCTTTCTCCACCTTGGAGATCCAGCGCACAGAGCAGGGGGACTCGGCCATGTATCTCTGTGCCAGCAGNNNNGGACAGNNNNNTAATGAAAAACTGTTTTTTGGCAGTGGAACCCAGCTCTCTGTCTTGG	DTGVSQDPRHKITKRGQNVTFRCDPISEHNRLYWYRQTLGQGPEFLTYFQNEAQLEKSRLLSDRFSAGRPKGSFSTLEIQRTEQGDSAMYLCASRPGQSLNEKLFFGSGTQLSVL	DTGVSQDPRHKITKRGQNVTFRCDPISEHNRLYWYRQTLGQGPEFLTYFQNEAQLEKSRLLSDRFSAERPKGSFSTLEIQRTEQGDSAMYLCASXXGQXXNEKLFFGSGTQLSVL	1	284	289	294	300	346	GATACTGGAGTCTCCCAGGACCCCAGACACAAGATCACAAAGAGGGGACAGAATGTAACTTTCAGGTGTGATCCAATTTCTGAACACAACCGCCTTTATTGGTACCGACAGACCCTGGGGCAGGGCCCAGAGTTTCTGACTTACTTCCAGAATGAAGCTCAACTAGAAAAATCAAGGCTGCTCAGTGATCGGTTCTCTGCAGGGAGGCCTAAGGGATCTTTCTCCACCTTGGAGATCCAGCGCACAGAGCAGGGGGACTCGGCCATGTATCTCTGTGCCAGCAG	DTGVSQDPRHKITKRGQNVTFRCDPISEHNRLYWYRQTLGQGPEFLTYFQNEAQLEKSRLLSDRFSAGRPKGSFSTLEIQRTEQGDSAMYLCAS	GATACTGGAGTCTCCCAGGACCCCAGACACAAGATCACAAAGAGGGGACAGAATGTAACTTTCAGGTGTGATCCAATTTCTGAACACAACCGCCTTTATTGGTACCGACAGACCCTGGGGCAGGGCCCAGAGTTTCTGACTTACTTCCAGAATGAAGCTCAACTAGAAAAATCAAGGCTGCTCAGTGATCGGTTCTCTGCAGAGAGGCCTAAGGGATCTTTCTCCACCTTGGAGATCCAGCGCACAGAGCAGGGGGACTCGGCCATGTATCTCTGTGCCAGCAG	DTGVSQDPRHKITKRGQNVTFRCDPISEHNRLYWYRQTLGQGPEFLTYFQNEAQLEKSRLLSDRFSAERPKGSFSTLEIQRTEQGDSAMYLCAS	GGACAG	GQ	GGACAG	GQ	TAATGAAAAACTGTTTTTTGGCAGTGGAACCCAGCTCTCTGTCTTGG	NEKLFFGSGTQLSVL	TAATGAAAAACTGTTTTTTGGCAGTGGAACCCAGCTCTCTGTCTTGG	NEKLFFGSGTQLSVL	GATACTGGAGTCTCCCAGGACCCCAGACACAAGATCACAAAGAGGGGACAGAATGTAACTTTCAGGTGTGATCCAATT	DTGVSQDPRHKITKRGQNVTFRCDPI	TCTGAACACAACCGC	SEHNR	CTTTATTGGTACCGACAGACCCTGGGGCAGGGCCCAGAGTTTCTGACTTAC	LYWYRQTLGQGPEFLTY	TTCCAGAATGAAGCTCAA	FQNEAQ
Pat726	KW11	AGAGCTTCAGAGCCAA	TCRbeta	tig00000004_AGAGCTTCAGAGCCAA	1151	114	1	GATACTGGAGTCTCCCAGGACCCCAGACACAAGATCACAAAGAGGGGACAGAATGTAACTTTCAGGTGTGATCCAATTTCTGAACACAACCGCCTTTATTGGTACCGACAGACCCTGGGGCAGGGCCCAGAGTTTCTGACTTACTTCCAGAATGAAGCTCAACTAGAAAAATCAAGGCTGCTCAGTGATCGGTTCTCTGCAGAGAGGCCTAAGGGATCTTTCTCCACCTTGGAGATCCAGCGCACAGAGCAGGGGGACTCGGCCATGTATCTCTGTGCCACCCCAATTATGATGAGGGAGCTGTTTTTTGGAGAAGGCTCTAGGCTGACCGTACTGG	DTGVSQDPRHKITKRGQNVTFRCDPISEHNRLYWYRQTLGQGPEFLTYFQNEAQLEKSRLLSDRFSAERPKGSFSTLEIQRTEQGDSAMYLCATPIMMRELFFGEGSRLTVL	TRB	F	T	F	T	F	T	TRBV7-9*03		TRBJ2-2*01	GATACTGGAGTCTCCCAGGACCCCAGACACAAGATCACAAAGAGGGGACAGAATGTAACTTTCAGGTGTGATCCAATTTCTGAACACAACCGCCTTTATTGGTACCGACAGACCCTGGGGCAGGGCCCAGAGTTTCTGACTTACTTCCAGAATGAAGCTCAACTAGAAAAATCAAGGCTGCTCAGTGATCGGTTCTCTGCAGAGAGGCCTAAGGGATCTTTCTCCACCTTGGAGATCCAGCGCACAGAGCAGGGGGACTCGGCCATGTATCTCTGTGCCACCCCAATTATGATGAGGGAGCTGTTTTTTGGAGAAGGCTCTAGGCTGACCGTACTGG	GATACTGGAGTCTCCCAGGACCCCAGACACAAGATCACAAAGAGGGGACAGAATGTAACTTTCAGGTGTGATCCAATTTCTGAACACAACCGCCTTTATTGGTACCGACAGACCCTGGGGCAGGGCCCAGAGTTTCTGACTTACTTCCAGAATGAAGCTCAACTAGAAAAATCAAGGCTGCTCAGTGATCGGTTCTCTGCAGAGAGGCCTAAGGGATCTTTCTCCACCTTGGAGATCCAGCGCACAGAGCAGGGGGACTCGGCCATGTATCTCTGTGCCANNNNNNNNNNNNNNNGGGAGCTGTTTTTTGGAGAAGGCTCTAGGCTGACCGTACTGG	DTGVSQDPRHKITKRGQNVTFRCDPISEHNRLYWYRQTLGQGPEFLTYFQNEAQLEKSRLLSDRFSAERPKGSFSTLEIQRTEQGDSAMYLCATPIMMRELFFGEGSRLTVL	DTGVSQDPRHKITKRGQNVTFRCDPISEHNRLYWYRQTLGQGPEFLTYFQNEAQLEKSRLLSDRFSAERPKGSFSTLEIQRTEQGDSAMYLCAXXXXXXELFFGEGSRLTVL	1	280			296	337	GATACTGGAGTCTCCCAGGACCCCAGACACAAGATCACAAAGAGGGGACAGAATGTAACTTTCAGGTGTGATCCAATTTCTGAACACAACCGCCTTTATTGGTACCGACAGACCCTGGGGCAGGGCCCAGAGTTTCTGACTTACTTCCAGAATGAAGCTCAACTAGAAAAATCAAGGCTGCTCAGTGATCGGTTCTCTGCAGAGAGGCCTAAGGGATCTTTCTCCACCTTGGAGATCCAGCGCACAGAGCAGGGGGACTCGGCCATGTATCTCTGTGCCA	DTGVSQDPRHKITKRGQNVTFRCDPISEHNRLYWYRQTLGQGPEFLTYFQNEAQLEKSRLLSDRFSAERPKGSFSTLEIQRTEQGDSAMYLCA	GATACTGGAGTCTCCCAGGACCCCAGACACAAGATCACAAAGAGGGGACAGAATGTAACTTTCAGGTGTGATCCAATTTCTGAACACAACCGCCTTTATTGGTACCGACAGACCCTGGGGCAGGGCCCAGAGTTTCTGACTTACTTCCAGAATGAAGCTCAACTAGAAAAATCAAGGCTGCTCAGTGATCGGTTCTCTGCAGAGAGGCCTAAGGGATCTTTCTCCACCTTGGAGATCCAGCGCACAGAGCAGGGGGACTCGGCCATGTATCTCTGTGCCA	DTGVSQDPRHKITKRGQNVTFRCDPISEHNRLYWYRQTLGQGPEFLTYFQNEAQLEKSRLLSDRFSAERPKGSFSTLEIQRTEQGDSAMYLCA					GGGAGCTGTTTTTTGGAGAAGGCTCTAGGCTGACCGTACTGG	ELFFGEGSRLTVL	GGGAGCTGTTTTTTGGAGAAGGCTCTAGGCTGACCGTACTGG	ELFFGEGSRLTVL	GATACTGGAGTCTCCCAGGACCCCAGACACAAGATCACAAAGAGGGGACAGAATGTAACTTTCAGGTGTGATCCAATT	DTGVSQDPRHKITKRGQNVTFRCDPI	TCTGAACACAACCGC	SEHNR	CTTTATTGGTACCGACAGACCCTGGGGCAGGGCCCAGAGTTTCTGACTTAC	LYWYRQTLGQGPEFLTY	TTCCAGAATGAAGCTCAA	FQNEAQ
Pat726	IW9	AGCGTATGTTTAGCTG	TCRbeta	tig00000004_AGCGTATGTTTAGCTG	836	496	1	AGACCCCAAAATTCCGCATCCTGAAGATAGGACAGAGCATGACACTGCAGTGTACCCAGGATATGAACCATAACTACATGTACTGGTATCGACAAGACCCAGGCATGGGGCTGAAGCTGATTTATTATTCAGTTGGTGCTGGTATCACTGATAAAGGAGAAGTCCCGAATGGCTACAACGTCTCCAGATCAACCACAGAGGATTTCCCGCTCAGGCTGGAGTTGGCTGCTCCCTCCCAGACATCTGTGTACTTCTGTGCCAGTACAGGGAACACTGAAGCTTTCTTTGGACAAGGCACCAGACTCACAGTTGTAG	TPKFRILKIGQSMTLQCTQDMNHNYMYWYRQDPGMGLKLIYYSVGAGITDKGEVPNGYNVSRSTTEDFPLRLELAAPSQTSVYFCASTGNTEAFFGQGTRLTVV	TRB	F	T	F	T	F	F	TRBV6-6*01	TRBD1*01	TRBJ1-1*01	AGACCCCAAAATTCCGCATCCTGAAGATAGGACAGAGCATGACACTGCAGTGTACCCAGGATATGAACCATAACTACATGTACTGGTATCGACAAGACCCAGGCATGGGGCTGAAGCTGATTTATTATTCAGTTGGTGCTGGTATCACTGATAAAGGAGAAGTCCCGAATGGCTACAACGTCTCCAGATCAACCACAGAGGATTTCCCGCTCAGGCTGGAGTTGGCTGCTCCCTCCCAGACATCTGTGTACTTCTGTGCCAGTACAGGGAACACTGAAGCTTTCTTTGGACAAGGCACCAGACTCACAGTTGTAG	AGACCCCAAAATTCCGCATCCTGAAGATAGGACAGAGCATGACACTGCAGTGTACCCAGGATATGAACCATAACTACATGTACTGGTATCGACAAGACCCAGGCATGGGGCTGAAGCTGATTTATTATTCAGTTGGTGCTGGTATCACTGATAAAGGAGAAGTCCCGAATGGCTACAACGTCTCCAGATCAACCACAGAGGATTTCCCGCTCAGGCTGGAGTTGGCTGCTCCCTCCCAGACATCTGTGTACTTCTGTGCCAGNACAGGGAACACTGAAGCTTTCTTTGGACAAGGCACCAGACTCACAGTTGTAG	TPKFRILKIGQSMTLQCTQDMNHNYMYWYRQDPGMGLKLIYYSVGAGITDKGEVPNGYNVSRSTTEDFPLRLELAAPSQTSVYFCASTGNTEAFFGQGTRLTVV	TPKFRILKIGQSMTLQCTQDMNHNYMYWYRQDPGMGLKLIYYSVGAGITDKGEVPNGYNVSRSTTEDFPLRLELAAPSQTSVYFCAXTGNTEAFFGQGTRLTVV	1	262	264	268	269	315	AGACCCCAAAATTCCGCATCCTGAAGATAGGACAGAGCATGACACTGCAGTGTACCCAGGATATGAACCATAACTACATGTACTGGTATCGACAAGACCCAGGCATGGGGCTGAAGCTGATTTATTATTCAGTTGGTGCTGGTATCACTGATAAAGGAGAAGTCCCGAATGGCTACAACGTCTCCAGATCAACCACAGAGGATTTCCCGCTCAGGCTGGAGTTGGCTGCTCCCTCCCAGACATCTGTGTACTTCTGTGCCAG	TPKFRILKIGQSMTLQCTQDMNHNYMYWYRQDPGMGLKLIYYSVGAGITDKGEVPNGYNVSRSTTEDFPLRLELAAPSQTSVYFCA	AGACCCCAAAATTCCGCATCCTGAAGATAGGACAGAGCATGACACTGCAGTGTACCCAGGATATGAACCATAACTACATGTACTGGTATCGACAAGACCCAGGCATGGGGCTGAAGCTGATTTATTATTCAGTTGGTGCTGGTATCACTGATAAAGGAGAAGTCCCGAATGGCTACAACGTCTCCAGATCAACCACAGAGGATTTCCCGCTCAGGCTGGAGTTGGCTGCTCCCTCCCAGACATCTGTGTACTTCTGTGCCAG	TPKFRILKIGQSMTLQCTQDMNHNYMYWYRQDPGMGLKLIYYSVGAGITDKGEVPNGYNVSRSTTEDFPLRLELAAPSQTSVYFCA	ACAGG	TG	ACAGG	TG	GAACACTGAAGCTTTCTTTGGACAAGGCACCAGACTCACAGTTGTAG	NTEAFFGQGTRLTVV	GAACACTGAAGCTTTCTTTGGACAAGGCACCAGACTCACAGTTGTAG	NTEAFFGQGTRLTVV	AGACCCCAAAATTCCGCATCCTGAAGATAGGACAGAGCATGACACTGCAGTGTACCCAGGAT	TPKFRILKIGQSMTLQCTQD	ATGAACCATAACTAC	MNHNY	ATGTACTGGTATCGACAAGACCCAGGCATGGGGCTGAAGCTGATTTATTAT	MYWYRQDPGMGLKLIYY	TCAGTTGGTGCTGGTATC	SVGAGI
Pat726	IW9	ATCACGATCCAGTATG	TCRbeta	tig00000013_ATCACGATCCAGTATG	609	320	1	GATTCTGGAGTCACACAAACCCCAAAGCACCTGATCACAGCAACTGGACAGCGAGTGACGCTGAGATGCTCCCCTAGGTCTGGAGACCTCTCTGTGTACTGGTACCAACAGAGCCTGGACCAGGGCCTCCAGTTCCTCATTCAGTATTATAATGGAGAAGAGAGAGCAAAAGGAAACATTCTTGAACGATTCTCCGCACAACAGTTCCCTGACTTGCACTCTGAACTAAACCTGAGCTCTCTGGAGCTGGGGGACTCAGCTTTGTATTTCTGTGCCAGCAGCCCCCCCGGGACACCTTCCTACGAGCAGTACTTCGGGCCGGGCACCAGGCTCACGGTCACAG	DSGVTQTPKHLITATGQRVTLRCSPRSGDLSVYWYQQSLDQGLQFLIQYYNGEERAKGNILERFSAQQFPDLHSELNLSSLELGDSALYFCASSPPGTPSYEQYFGPGTRLTVT	TRB	F	T	F	T	F	T	TRBV9*01	TRBD1*01	TRBJ2-7*01	GATTCTGGAGTCACACAAACCCCAAAGCACCTGATCACAGCAACTGGACAGCGAGTGACGCTGAGATGCTCCCCTAGGTCTGGAGACCTCTCTGTGTACTGGTACCAACAGAGCCTGGACCAGGGCCTCCAGTTCCTCATTCAGTATTATAATGGAGAAGAGAGAGCAAAAGGAAACATTCTTGAACGATTCTCCGCACAACAGTTCCCTGACTTGCACTCTGAACTAAACCTGAGCTCTCTGGAGCTGGGGGACTCAGCTTTGTATTTCTGTGCCAGCAGCCCCCCCGGGACACCTTCCTACGAGCAGTACTTCGGGCCGGGCACCAGGCTCACGGTCACAG	GATTCTGGAGTCACACAAACCCCAAAGCACCTGATCACAGCAACTGGACAGCGAGTGACGCTGAGATGCTCCCCTAGGTCTGGAGACCTCTCTGTGTACTGGTACCAACAGAGCCTGGACCAGGGCCTCCAGTTCCTCATTCAGTATTATAATGGAGAAGAGAGAGCAAAAGGAAACATTCTTGAACGATTCTCCGCACAACAGTTCCCTGACTTGCACTCTGAACTAAACCTGAGCTCTCTGGAGCTGGGGGACTCAGCTTTGTATTTCTGTGCCAGCAGCNNNNNNGGGACANNNTCCTACGAGCAGTACTTCGGGCCGGGCACCAGGCTCACGGTCACAG	DSGVTQTPKHLITATGQRVTLRCSPRSGDLSVYWYQQSLDQGLQFLIQYYNGEERAKGNILERFSAQQFPDLHSELNLSSLELGDSALYFCASSPPGTPSYEQYFGPGTRLTVT	DSGVTQTPKHLITATGQRVTLRCSPRSGDLSVYWYQQSLDQGLQFLIQYYNGEERAKGNILERFSAQQFPDLHSELNLSSLELGDSALYFCASSXXGTXSYEQYFGPGTRLTVT	1	282	289	294	298	343	GATTCTGGAGTCACACAAACCCCAAAGCACCTGATCACAGCAACTGGACAGCGAGTGACGCTGAGATGCTCCCCTAGGTCTGGAGACCTCTCTGTGTACTGGTACCAACAGAGCCTGGACCAGGGCCTCCAGTTCCTCATTCAGTATTATAATGGAGAAGAGAGAGCAAAAGGAAACATTCTTGAACGATTCTCCGCACAACAGTTCCCTGACTTGCACTCTGAACTAAACCTGAGCTCTCTGGAGCTGGGGGACTCAGCTTTGTATTTCTGTGCCAGCAGC	DSGVTQTPKHLITATGQRVTLRCSPRSGDLSVYWYQQSLDQGLQFLIQYYNGEERAKGNILERFSAQQFPDLHSELNLSSLELGDSALYFCASS	GATTCTGGAGTCACACAAACCCCAAAGCACCTGATCACAGCAACTGGACAGCGAGTGACGCTGAGATGCTCCCCTAGGTCTGGAGACCTCTCTGTGTACTGGTACCAACAGAGCCTGGACCAGGGCCTCCAGTTCCTCATTCAGTATTATAATGGAGAAGAGAGAGCAAAAGGAAACATTCTTGAACGATTCTCCGCACAACAGTTCCCTGACTTGCACTCTGAACTAAACCTGAGCTCTCTGGAGCTGGGGGACTCAGCTTTGTATTTCTGTGCCAGCAGC	DSGVTQTPKHLITATGQRVTLRCSPRSGDLSVYWYQQSLDQGLQFLIQYYNGEERAKGNILERFSAQQFPDLHSELNLSSLELGDSALYFCASS	GGGACA	GT	GGGACA	GT	TCCTACGAGCAGTACTTCGGGCCGGGCACCAGGCTCACGGTCACAG	SYEQYFGPGTRLTVT	TCCTACGAGCAGTACTTCGGGCCGGGCACCAGGCTCACGGTCACAG	SYEQYFGPGTRLTVT	GATTCTGGAGTCACACAAACCCCAAAGCACCTGATCACAGCAACTGGACAGCGAGTGACGCTGAGATGCTCCCCTAGG	DSGVTQTPKHLITATGQRVTLRCSPR	TCTGGAGACCTCTCT	SGDLS	GTGTACTGGTACCAACAGAGCCTGGACCAGGGCCTCCAGTTCCTCATTCAG	VYWYQQSLDQGLQFLIQ	TATTATAATGGAGAAGAG	YYNGEE
Pat726	TW10	ATCTACTAGAAGCCCA	TCRbeta	tig00000002_ATCTACTAGAAGCCCA	1026	501	1	GACACTGAAGTTACCCAGACACCAAAACACCTGGTCATGGGAATGACAAATAAGAAGTCTTTGAAATGTGAACAACATATGGGGCACAGGGCTATGTATTGGTACAAGCAGAAAGCTAAGAAGCCACCGGAGCTCATGTTTGTCTACAGCTATGAGAAACTCTCTATAAATGAAAGTGTGCCAAGTCGCTTCTCACCTGAATGCCCCAACAGCTCTCTCTTAAACCTTCACCTACACGCCCTGCAGCCAGAAGACTCAGCCCTGTATCTCTGCGCCAGCAGCCAGGCCACAGGGGCCCCCTACGAGCAGTACGTCGGGCCGGGCACCAGGCTCACGGTCACAG	DTEVTQTPKHLVMGMTNKKSLKCEQHMGHRAMYWYKQKAKKPPELMFVYSYEKLSINESVPSRFSPECPNSSLLNLHLHALQPEDSALYLCASSQATGAPYEQYVGPGTRLTVT	TRB	F	T	F	T	F	T	TRBV4-1*01	TRBD1*01	TRBJ2-7*02	GACACTGAAGTTACCCAGACACCAAAACACCTGGTCATGGGAATGACAAATAAGAAGTCTTTGAAATGTGAACAACATATGGGGCACAGGGCTATGTATTGGTACAAGCAGAAAGCTAAGAAGCCACCGGAGCTCATGTTTGTCTACAGCTATGAGAAACTCTCTATAAATGAAAGTGTGCCAAGTCGCTTCTCACCTGAATGCCCCAACAGCTCTCTCTTAAACCTTCACCTACACGCCCTGCAGCCAGAAGACTCAGCCCTGTATCTCTGCGCCAGCAGCCAGGCCACAGGGGCCCCCTACGAGCAGTACGTCGGGCCGGGCACCAGGCTCACGGTCACAG	GACACTGAAGTTACCCAGACACCAAAACACCTGGTCATGGGAATGACAAATAAGAAGTCTTTGAAATGTGAACAACATATGGGGCACAGGGCTATGTATTGGTACAAGCAGAAAGCTAAGAAGCCACCGGAGCTCATGTTTGTCTACAGCTATGAGAAACTCTCTATAAATGAAAGTGTGCCAAGTCGCTTCTCACCTGAATGCCCCAACAGCTCTCTCTTAAACCTTCACCTACACGCCCTGCAGCCAGAAGACTCAGCCCTGTATCTCTGCGCCAGCAGCCANNNNACAGGGGNNNCCTACGAGCAGTACGTCGGGCCGGGCACCAGGCTCACGGTCACAG	DTEVTQTPKHLVMGMTNKKSLKCEQHMGHRAMYWYKQKAKKPPELMFVYSYEKLSINESVPSRFSPECPNSSLLNLHLHALQPEDSALYLCASSQATGAPYEQYVGPGTRLTVT	DTEVTQTPKHLVMGMTNKKSLKCEQHMGHRAMYWYKQKAKKPPELMFVYSYEKLSINESVPSRFSPECPNSSLLNLHLHALQPEDSALYLCASSXXTGXXYEQYVGPGTRLTVT	1	284	289	295	299	343	GACACTGAAGTTACCCAGACACCAAAACACCTGGTCATGGGAATGACAAATAAGAAGTCTTTGAAATGTGAACAACATATGGGGCACAGGGCTATGTATTGGTACAAGCAGAAAGCTAAGAAGCCACCGGAGCTCATGTTTGTCTACAGCTATGAGAAACTCTCTATAAATGAAAGTGTGCCAAGTCGCTTCTCACCTGAATGCCCCAACAGCTCTCTCTTAAACCTTCACCTACACGCCCTGCAGCCAGAAGACTCAGCCCTGTATCTCTGCGCCAGCAGCCA	DTEVTQTPKHLVMGMTNKKSLKCEQHMGHRAMYWYKQKAKKPPELMFVYSYEKLSINESVPSRFSPECPNSSLLNLHLHALQPEDSALYLCASS	GACACTGAAGTTACCCAGACACCAAAACACCTGGTCATGGGAATGACAAATAAGAAGTCTTTGAAATGTGAACAACATATGGGGCACAGGGCTATGTATTGGTACAAGCAGAAAGCTAAGAAGCCACCGGAGCTCATGTTTGTCTACAGCTATGAGAAACTCTCTATAAATGAAAGTGTGCCAAGTCGCTTCTCACCTGAATGCCCCAACAGCTCTCTCTTAAACCTTCACCTACACGCCCTGCAGCCAGAAGACTCAGCCCTGTATCTCTGCGCCAGCAGCCA	DTEVTQTPKHLVMGMTNKKSLKCEQHMGHRAMYWYKQKAKKPPELMFVYSYEKLSINESVPSRFSPECPNSSLLNLHLHALQPEDSALYLCASS	ACAGGGG	TG	ACAGGGG	TG	CCTACGAGCAGTACGTCGGGCCGGGCACCAGGCTCACGGTCACAG	YEQYVGPGTRLTVT	CCTACGAGCAGTACGTCGGGCCGGGCACCAGGCTCACGGTCACAG	YEQYVGPGTRLTVT	GACACTGAAGTTACCCAGACACCAAAACACCTGGTCATGGGAATGACAAATAAGAAGTCTTTGAAATGTGAACAACAT	DTEVTQTPKHLVMGMTNKKSLKCEQH	ATGGGGCACAGGGCT	MGHRA	ATGTATTGGTACAAGCAGAAAGCTAAGAAGCCACCGGAGCTCATGTTTGTC	MYWYKQKAKKPPELMFV	TACAGCTATGAGAAACTC	YSYEKL
Pat726	IW9	ATGGGAGCACAGTCGC	TCRbeta	tig00000005_ATGGGAGCACAGTCGC	1203	265	1	GACACTGAAGTTACCCAGACACCAAAACACCTGGTCATGGGAATGACAAATAAGAAGTCTTTGAAATGTGAACAACATATGGGGCACAGGGCTATGTATTGGTACAAGCAGAAAGCTAAGAAGCCACCGGAGCTCATGTTTGTCTACAGCTATGAGAAACTCTCTATAAATGAAAGTGTGCCAAGTCGCTTCTCACCTGAATGCCCCAACAGCTCTCTCTTAAACCTTCACCTACACGCCCTGCAGCCAGAAGACTCAGCCCTGTATCTCTGCGCCAGCAGCCAAGATCCGGGGAATTCCAATTCACCCCTCCACTTTGGGAACGGGACCAGGCTCACTGTGACAG	DTEVTQTPKHLVMGMTNKKSLKCEQHMGHRAMYWYKQKAKKPPELMFVYSYEKLSINESVPSRFSPECPNSSLLNLHLHALQPEDSALYLCASSQDPGNSNSPLHFGNGTRLTVT	TRB	F	T	F	T	F	T	TRBV4-1*01	TRBD2*01	TRBJ1-6*02	GACACTGAAGTTACCCAGACACCAAAACACCTGGTCATGGGAATGACAAATAAGAAGTCTTTGAAATGTGAACAACATATGGGGCACAGGGCTATGTATTGGTACAAGCAGAAAGCTAAGAAGCCACCGGAGCTCATGTTTGTCTACAGCTATGAGAAACTCTCTATAAATGAAAGTGTGCCAAGTCGCTTCTCACCTGAATGCCCCAACAGCTCTCTCTTAAACCTTCACCTACACGCCCTGCAGCCAGAAGACTCAGCCCTGTATCTCTGCGCCAGCAGCCAAGATCCGGGGAATTCCAATTCACCCCTCCACTTTGGGAACGGGACCAGGCTCACTGTGACAG	GACACTGAAGTTACCCAGACACCAAAACACCTGGTCATGGGAATGACAAATAAGAAGTCTTTGAAATGTGAACAACATATGGGGCACAGGGCTATGTATTGGTACAAGCAGAAAGCTAAGAAGCCACCGGAGCTCATGTTTGTCTACAGCTATGAGAAACTCTCTATAAATGAAAGTGTGCCAAGTCGCTTCTCACCTGAATGCCCCAACAGCTCTCTCTTAAACCTTCACCTACACGCCCTGCAGCCAGAAGACTCAGCCCTGTATCTCTGCGCCAGCAGCCAAGANNCGGGGNNNNNNAATTCACCCCTCCACTTTGGGAACGGGACCAGGCTCACTGTGACAG	DTEVTQTPKHLVMGMTNKKSLKCEQHMGHRAMYWYKQKAKKPPELMFVYSYEKLSINESVPSRFSPECPNSSLLNLHLHALQPEDSALYLCASSQDPGNSNSPLHFGNGTRLTVT	DTEVTQTPKHLVMGMTNKKSLKCEQHMGHRAMYWYKQKAKKPPELMFVYSYEKLSINESVPSRFSPECPNSSLLNLHLHALQPEDSALYLCASSQXXGXXNSPLHFGNGTRLTVT	1	287	290	294	301	346	GACACTGAAGTTACCCAGACACCAAAACACCTGGTCATGGGAATGACAAATAAGAAGTCTTTGAAATGTGAACAACATATGGGGCACAGGGCTATGTATTGGTACAAGCAGAAAGCTAAGAAGCCACCGGAGCTCATGTTTGTCTACAGCTATGAGAAACTCTCTATAAATGAAAGTGTGCCAAGTCGCTTCTCACCTGAATGCCCCAACAGCTCTCTCTTAAACCTTCACCTACACGCCCTGCAGCCAGAAGACTCAGCCCTGTATCTCTGCGCCAGCAGCCAAGA	DTEVTQTPKHLVMGMTNKKSLKCEQHMGHRAMYWYKQKAKKPPELMFVYSYEKLSINESVPSRFSPECPNSSLLNLHLHALQPEDSALYLCASSQ	GACACTGAAGTTACCCAGACACCAAAACACCTGGTCATGGGAATGACAAATAAGAAGTCTTTGAAATGTGAACAACATATGGGGCACAGGGCTATGTATTGGTACAAGCAGAAAGCTAAGAAGCCACCGGAGCTCATGTTTGTCTACAGCTATGAGAAACTCTCTATAAATGAAAGTGTGCCAAGTCGCTTCTCACCTGAATGCCCCAACAGCTCTCTCTTAAACCTTCACCTACACGCCCTGCAGCCAGAAGACTCAGCCCTGTATCTCTGCGCCAGCAGCCAAGA	DTEVTQTPKHLVMGMTNKKSLKCEQHMGHRAMYWYKQKAKKPPELMFVYSYEKLSINESVPSRFSPECPNSSLLNLHLHALQPEDSALYLCASSQ	CGGGG	G	CGGGG	G	AATTCACCCCTCCACTTTGGGAACGGGACCAGGCTCACTGTGACAG	NSPLHFGNGTRLTVT	AATTCACCCCTCCACTTTGGGAACGGGACCAGGCTCACTGTGACAG	NSPLHFGNGTRLTVT	GACACTGAAGTTACCCAGACACCAAAACACCTGGTCATGGGAATGACAAATAAGAAGTCTTTGAAATGTGAACAACAT	DTEVTQTPKHLVMGMTNKKSLKCEQH	ATGGGGCACAGGGCT	MGHRA	ATGTATTGGTACAAGCAGAAAGCTAAGAAGCCACCGGAGCTCATGTTTGTC	MYWYKQKAKKPPELMFV	TACAGCTATGAGAAACTC	YSYEKL
Pat726	KW11	CAACTAGGTATCACCA	TCRbeta	tig00000367_CAACTAGGTATCACCA	1097	497	1	AATGCTGGTGTCACTCAGACCCCAAAATTCCAGGTCCTGAAGACAGGACAGAGCATGACACTGCAGTGTGCCCAGGATATGAACCATGAATACATGTCCTGGTATCGACAAGACCCAGGCATGGGGCTGAGGCTGATTCATTACTCAGTTGGTGCTGGTATCACTGACCAAGGAGAAGTCCCCAATGGCTACAATGTCTCCAGATCAACCACAGAGGATTTCCCGCTCAGGCTGCTGTCGGCTGCTCCCTCCCAGACATCTGTGTACTTCTGTGCCAGCACCCCGGGGGGGATGAGGACTGAAGCTTTCTTTGGACAAGGCACCAGACTCACAGTTGTAG	NAGVTQTPKFQVLKTGQSMTLQCAQDMNHEYMSWYRQDPGMGLRLIHYSVGAGITDQGEVPNGYNVSRSTTEDFPLRLLSAAPSQTSVYFCASTPGGMRTEAFFGQGTRLTVV	TRB	F	T	F	T	F	T	TRBV6-5*01	TRBD2*01	TRBJ1-1*01	AATGCTGGTGTCACTCAGACCCCAAAATTCCAGGTCCTGAAGACAGGACAGAGCATGACACTGCAGTGTGCCCAGGATATGAACCATGAATACATGTCCTGGTATCGACAAGACCCAGGCATGGGGCTGAGGCTGATTCATTACTCAGTTGGTGCTGGTATCACTGACCAAGGAGAAGTCCCCAATGGCTACAATGTCTCCAGATCAACCACAGAGGATTTCCCGCTCAGGCTGCTGTCGGCTGCTCCCTCCCAGACATCTGTGTACTTCTGTGCCAGCACCCCGGGGGGGATGAGGACTGAAGCTTTCTTTGGACAAGGCACCAGACTCACAGTTGTAG	AATGCTGGTGTCACTCAGACCCCAAAATTCCAGGTCCTGAAGACAGGACAGAGCATGACACTGCAGTGTGCCCAGGATATGAACCATGAATACATGTCCTGGTATCGACAAGACCCAGGCATGGGGCTGAGGCTGATTCATTACTCAGTTGGTGCTGGTATCACTGACCAAGGAGAAGTCCCCAATGGCTACAATGTCTCCAGATCAACCACAGAGGATTTCCCGCTCAGGCTGCTGTCGGCTGCTCCCTCCCAGACATCTGTGTACTTCTGTGCCAGCANNNCGGGGGGGNNNNNNACTGAAGCTTTCTTTGGACAAGGCACCAGACTCACAGTTGTAG	NAGVTQTPKFQVLKTGQSMTLQCAQDMNHEYMSWYRQDPGMGLRLIHYSVGAGITDQGEVPNGYNVSRSTTEDFPLRLLSAAPSQTSVYFCASTPGGMRTEAFFGQGTRLTVV	NAGVTQTPKFQVLKTGQSMTLQCAQDMNHEYMSWYRQDPGMGLRLIHYSVGAGITDQGEVPNGYNVSRSTTEDFPLRLLSAAPSQTSVYFCASXXGGXXTEAFFGQGTRLTVV	1	280	284	291	298	340	AATGCTGGTGTCACTCAGACCCCAAAATTCCAGGTCCTGAAGACAGGACAGAGCATGACACTGCAGTGTGCCCAGGATATGAACCATGAATACATGTCCTGGTATCGACAAGACCCAGGCATGGGGCTGAGGCTGATTCATTACTCAGTTGGTGCTGGTATCACTGACCAAGGAGAAGTCCCCAATGGCTACAATGTCTCCAGATCAACCACAGAGGATTTCCCGCTCAGGCTGCTGTCGGCTGCTCCCTCCCAGACATCTGTGTACTTCTGTGCCAGCA	NAGVTQTPKFQVLKTGQSMTLQCAQDMNHEYMSWYRQDPGMGLRLIHYSVGAGITDQGEVPNGYNVSRSTTEDFPLRLLSAAPSQTSVYFCAS	AATGCTGGTGTCACTCAGACCCCAAAATTCCAGGTCCTGAAGACAGGACAGAGCATGACACTGCAGTGTGCCCAGGATATGAACCATGAATACATGTCCTGGTATCGACAAGACCCAGGCATGGGGCTGAGGCTGATTCATTACTCAGTTGGTGCTGGTATCACTGACCAAGGAGAAGTCCCCAATGGCTACAATGTCTCCAGATCAACCACAGAGGATTTCCCGCTCAGGCTGCTGTCGGCTGCTCCCTCCCAGACATCTGTGTACTTCTGTGCCAGCA	NAGVTQTPKFQVLKTGQSMTLQCAQDMNHEYMSWYRQDPGMGLRLIHYSVGAGITDQGEVPNGYNVSRSTTEDFPLRLLSAAPSQTSVYFCAS	CGGGGGGG	GG	CGGGGGGG	GG	ACTGAAGCTTTCTTTGGACAAGGCACCAGACTCACAGTTGTAG	TEAFFGQGTRLTVV	ACTGAAGCTTTCTTTGGACAAGGCACCAGACTCACAGTTGTAG	TEAFFGQGTRLTVV	AATGCTGGTGTCACTCAGACCCCAAAATTCCAGGTCCTGAAGACAGGACAGAGCATGACACTGCAGTGTGCCCAGGAT	NAGVTQTPKFQVLKTGQSMTLQCAQD	ATGAACCATGAATAC	MNHEY	ATGTCCTGGTATCGACAAGACCCAGGCATGGGGCTGAGGCTGATTCATTAC	MSWYRQDPGMGLRLIHY	TCAGTTGGTGCTGGTATC	SVGAGI
Pat726	TW10	CACAAACAGAGGGCTT	TCRbeta	tig00000012_CACAAACAGAGGGCTT	1232	484	1	GAGACTGGAGTCACCCAAAGTCCCACACACCTGATCAAAACGAGAGGACAGCAAGTGACTCTGAGATGCTCTTCTCAGTCTGGGCACAACACTGTGTCCTGGTACCAACAGGCCCTGGGTCAGGGGCCCCAGTTTATCTTTCAGTATTATAGGGAGGAAGAGAATGGCAGAGGAAACTTCCCTCCTAGATTCTCAGGTCTCCAGTTCCCTAATTATAGCTCTGAGCTGAATGTGAACGCCTTGGAGCTGGACGACTCGGCCCTGTATCTCTGTGCCAGCAGCTTGTTTGGGGGACAAATGAACACTGAAGCTTTCTTTGGACAAGGCACCAGACTCACAGTTGTAG	ETGVTQSPTHLIKTRGQQVTLRCSSQSGHNTVSWYQQALGQGPQFIFQYYREEENGRGNFPPRFSGLQFPNYSSELNVNALELDDSALYLCASSLFGGQMNTEAFFGQGTRLTVV	TRB	F	T	F	T	F	T	TRBV5-4*01	TRBD1*01	TRBJ1-1*01	GAGACTGGAGTCACCCAAAGTCCCACACACCTGATCAAAACGAGAGGACAGCAAGTGACTCTGAGATGCTCTTCTCAGTCTGGGCACAACACTGTGTCCTGGTACCAACAGGCCCTGGGTCAGGGGCCCCAGTTTATCTTTCAGTATTATAGGGAGGAAGAGAATGGCAGAGGAAACTTCCCTCCTAGATTCTCAGGTCTCCAGTTCCCTAATTATAGCTCTGAGCTGAATGTGAACGCCTTGGAGCTGGACGACTCGGCCCTGTATCTCTGTGCCAGCAGCTTGTTTGGGGGACAAATGAACACTGAAGCTTTCTTTGGACAAGGCACCAGACTCACAGTTGTAG	GAGACTGGAGTCACCCAAAGTCCCACACACCTGATCAAAACGAGAGGACAGCAAGTGACTCTGAGATGCTCTTCTCAGTCTGGGCACAACACTGTGTCCTGGTACCAACAGGCCCTGGGTCAGGGGCCCCAGTTTATCTTTCAGTATTATAGGGAGGAAGAGAATGGCAGAGGAAACTTCCCTCCTAGATTCTCAGGTCTCCAGTTCCCTAATTATAGCTCTGAGCTGAATGTGAACGCCTTGGAGCTGGACGACTCGGCCCTGTATCTCTGTGCCAGCAGCTTGNNNNNGGGACANNTGAACACTGAAGCTTTCTTTGGACAAGGCACCAGACTCACAGTTGTAG	ETGVTQSPTHLIKTRGQQVTLRCSSQSGHNTVSWYQQALGQGPQFIFQYYREEENGRGNFPPRFSGLQFPNYSSELNVNALELDDSALYLCASSLFGGQMNTEAFFGQGTRLTVV	ETGVTQSPTHLIKTRGQQVTLRCSSQSGHNTVSWYQQALGQGPQFIFQYYREEENGRGNFPPRFSGLQFPNYSSELNVNALELDDSALYLCASSLXXGXXNTEAFFGQGTRLTVV	1	285	291	296	299	346	GAGACTGGAGTCACCCAAAGTCCCACACACCTGATCAAAACGAGAGGACAGCAAGTGACTCTGAGATGCTCTTCTCAGTCTGGGCACAACACTGTGTCCTGGTACCAACAGGCCCTGGGTCAGGGGCCCCAGTTTATCTTTCAGTATTATAGGGAGGAAGAGAATGGCAGAGGAAACTTCCCTCCTAGATTCTCAGGTCTCCAGTTCCCTAATTATAGCTCTGAGCTGAATGTGAACGCCTTGGAGCTGGACGACTCGGCCCTGTATCTCTGTGCCAGCAGCTTG	ETGVTQSPTHLIKTRGQQVTLRCSSQSGHNTVSWYQQALGQGPQFIFQYYREEENGRGNFPPRFSGLQFPNYSSELNVNALELDDSALYLCASSL	GAGACTGGAGTCACCCAAAGTCCCACACACCTGATCAAAACGAGAGGACAGCAAGTGACTCTGAGATGCTCTTCTCAGTCTGGGCACAACACTGTGTCCTGGTACCAACAGGCCCTGGGTCAGGGGCCCCAGTTTATCTTTCAGTATTATAGGGAGGAAGAGAATGGCAGAGGAAACTTCCCTCCTAGATTCTCAGGTCTCCAGTTCCCTAATTATAGCTCTGAGCTGAATGTGAACGCCTTGGAGCTGGACGACTCGGCCCTGTATCTCTGTGCCAGCAGCTTG	ETGVTQSPTHLIKTRGQQVTLRCSSQSGHNTVSWYQQALGQGPQFIFQYYREEENGRGNFPPRFSGLQFPNYSSELNVNALELDDSALYLCASSL	GGGACA	G	GGGACA	G	TGAACACTGAAGCTTTCTTTGGACAAGGCACCAGACTCACAGTTGTAG	NTEAFFGQGTRLTVV	TGAACACTGAAGCTTTCTTTGGACAAGGCACCAGACTCACAGTTGTAG	NTEAFFGQGTRLTVV	GAGACTGGAGTCACCCAAAGTCCCACACACCTGATCAAAACGAGAGGACAGCAAGTGACTCTGAGATGCTCTTCTCAG	ETGVTQSPTHLIKTRGQQVTLRCSSQ	TCTGGGCACAACACT	SGHNT	GTGTCCTGGTACCAACAGGCCCTGGGTCAGGGGCCCCAGTTTATCTTTCAG	VSWYQQALGQGPQFIFQ	TATTATAGGGAGGAAGAG	YYREEE
Pat726	TW10	CACCAGGTCCGAAGAG	TCRbeta	tig00000002_CACCAGGTCCGAAGAG	1170	501	1	GAAACGGGAGTTACGCAGACACCAAGACACCTGGTCATGGGAATGACAAATAAGAAGTCTTTGAAATGTGAACAACATCTGGGGCATAACGCTATGTATTGGTACAAGCAAAGTGCTAAGAAGCCACTGGAGCTCATGTTTGTCTACAACTTTAAAGAACAGACTGAAAACAACAGTGTGCCAAGTCGCTTCTCACCTGAATGCCCCAACAGCTCTCACTTATTCCTTCACCTACACACCCTGCAGCCAGAAGACTCGGCCCTGTATCTCTGTGCCAGCAGCCCGCCTGGCTTCGGGAACGCCGGGGAGCTGTTTTTTGGAGAAGGCTCTAGGCTGACCGTACTGG	ETGVTQTPRHLVMGMTNKKSLKCEQHLGHNAMYWYKQSAKKPLELMFVYNFKEQTENNSVPSRFSPECPNSSHLFLHLHTLQPEDSALYLCASSPPGFGNAGELFFGEGSRLTVL	TRB	F	T	F	T	F	T	TRBV4-2*01		TRBJ2-2*01	GAAACGGGAGTTACGCAGACACCAAGACACCTGGTCATGGGAATGACAAATAAGAAGTCTTTGAAATGTGAACAACATCTGGGGCATAACGCTATGTATTGGTACAAGCAAAGTGCTAAGAAGCCACTGGAGCTCATGTTTGTCTACAACTTTAAAGAACAGACTGAAAACAACAGTGTGCCAAGTCGCTTCTCACCTGAATGCCCCAACAGCTCTCACTTATTCCTTCACCTACACACCCTGCAGCCAGAAGACTCGGCCCTGTATCTCTGTGCCAGCAGCCCGCCTGGCTTCGGGAACGCCGGGGAGCTGTTTTTTGGAGAAGGCTCTAGGCTGACCGTACTGG	GAAACGGGAGTTACGCAGACACCAAGACACCTGGTCATGGGAATGACAAATAAGAAGTCTTTGAAATGTGAACAACATCTGGGGCATAACGCTATGTATTGGTACAAGCAAAGTGCTAAGAAGCCACTGGAGCTCATGTTTGTCTACAACTTTAAAGAACAGACTGAAAACAACAGTGTGCCAAGTCGCTTCTCACCTGAATGCCCCAACAGCTCTCACTTATTCCTTCACCTACACACCCTGCAGCCAGAAGACTCGGCCCTGTATCTCTGTGCCAGCAGCCNNNNNNNNNNNNNGAACACCGGGGAGCTGTTTTTTGGAGAAGGCTCTAGGCTGACCGTACTGG	ETGVTQTPRHLVMGMTNKKSLKCEQHLGHNAMYWYKQSAKKPLELMFVYNFKEQTENNSVPSRFSPECPNSSHLFLHLHTLQPEDSALYLCASSPPGFGNAGELFFGEGSRLTVL	ETGVTQTPRHLVMGMTNKKSLKCEQHLGHNAMYWYKQSAKKPLELMFVYNFKEQTENNSVPSRFSPECPNSSHLFLHLHTLQPEDSALYLCASSXXXXXNTGELFFGEGSRLTVL	1	283			297	346	GAAACGGGAGTTACGCAGACACCAAGACACCTGGTCATGGGAATGACAAATAAGAAGTCTTTGAAATGTGAACAACATCTGGGGCATAACGCTATGTATTGGTACAAGCAAAGTGCTAAGAAGCCACTGGAGCTCATGTTTGTCTACAACTTTAAAGAACAGACTGAAAACAACAGTGTGCCAAGTCGCTTCTCACCTGAATGCCCCAACAGCTCTCACTTATTCCTTCACCTACACACCCTGCAGCCAGAAGACTCGGCCCTGTATCTCTGTGCCAGCAGCC	ETGVTQTPRHLVMGMTNKKSLKCEQHLGHNAMYWYKQSAKKPLELMFVYNFKEQTENNSVPSRFSPECPNSSHLFLHLHTLQPEDSALYLCASS	GAAACGGGAGTTACGCAGACACCAAGACACCTGGTCATGGGAATGACAAATAAGAAGTCTTTGAAATGTGAACAACATCTGGGGCATAACGCTATGTATTGGTACAAGCAAAGTGCTAAGAAGCCACTGGAGCTCATGTTTGTCTACAACTTTAAAGAACAGACTGAAAACAACAGTGTGCCAAGTCGCTTCTCACCTGAATGCCCCAACAGCTCTCACTTATTCCTTCACCTACACACCCTGCAGCCAGAAGACTCGGCCCTGTATCTCTGTGCCAGCAGCC	ETGVTQTPRHLVMGMTNKKSLKCEQHLGHNAMYWYKQSAKKPLELMFVYNFKEQTENNSVPSRFSPECPNSSHLFLHLHTLQPEDSALYLCASS					GAACGCCGGGGAGCTGTTTTTTGGAGAAGGCTCTAGGCTGACCGTACTGG	NAGELFFGEGSRLTVL	GAACACCGGGGAGCTGTTTTTTGGAGAAGGCTCTAGGCTGACCGTACTGG	NTGELFFGEGSRLTVL	GAAACGGGAGTTACGCAGACACCAAGACACCTGGTCATGGGAATGACAAATAAGAAGTCTTTGAAATGTGAACAACAT	ETGVTQTPRHLVMGMTNKKSLKCEQH	CTGGGGCATAACGCT	LGHNA	ATGTATTGGTACAAGCAAAGTGCTAAGAAGCCACTGGAGCTCATGTTTGTC	MYWYKQSAKKPLELMFV	TACAACTTTAAAGAACAG	YNFKEQ
Pat726	IW9	CAGTCCTCATGCCTTC	TCRbeta	tig00000020_CAGTCCTCATGCCTTC	1050	313	1	GATGCTGGAATCACCCAGAGCCCAAGATACAAGATCACAGAGACAGGAAGGCAGGTGACCTTGATGTGTCACCAGACTTGGAGCCACAGCTATATGTTCTGGTATCGACAAGACCTGGGACATGGGCTGAGGCTGATCTATTACTCAGCAGCTGCTGATATTACAGATAAAGGAGAAGTCCCCGATGGCTACGTTGTCTCCAGATCCAAGACAGAGAATTTCCCCCTCACTCTGGAGTCAGCTACCCGCTCCCAGACATCTGTGTATTTCTGCGCCAGCAGTATAAGCGCCCTGGAGGGGGGCTACACCTTCGGTTCGGGGACCAGGTTAACCGTTGTAG	DAGITQSPRYKITETGRQVTLMCHQTWSHSYMFWYRQDLGHGLRLIYYSAAADITDKGEVPDGYVVSRSKTENFPLTLESATRSQTSVYFCASSISALEGGYTFGSGTRLTVV	TRB	F	T	F	T	F	T	TRBV10-2*02	TRBD2*02	TRBJ1-2*01	GATGCTGGAATCACCCAGAGCCCAAGATACAAGATCACAGAGACAGGAAGGCAGGTGACCTTGATGTGTCACCAGACTTGGAGCCACAGCTATATGTTCTGGTATCGACAAGACCTGGGACATGGGCTGAGGCTGATCTATTACTCAGCAGCTGCTGATATTACAGATAAAGGAGAAGTCCCCGATGGCTACGTTGTCTCCAGATCCAAGACAGAGAATTTCCCCCTCACTCTGGAGTCAGCTACCCGCTCCCAGACATCTGTGTATTTCTGCGCCAGCAGTATAAGCGCCCTGGAGGGGGGCTACACCTTCGGTTCGGGGACCAGGTTAACCGTTGTAG	GATGCTGGAATCACCCAGAGCCCAAGATACAAGATCACAGAGACAGGAAGGCAGGTGACCTTGATGTGTCACCAGACTTGGAGCCACAGCTATATGTTCTGGTATCGACAAGACCTGGGACATGGGCTGAGGCTGATCTATTACTCAGCAGCTGCTGATATTACAGATAAAGGAGAAGTCCCCGATGGCTACGTTGTCTCCAGATCCAAGACAGAGAATTTCCCCCTCACTCTGGAGTCAGCTACCCGCTCCCAGACATCTGTGTATTTCTGCGCCAGCAGTNNNNNNNNNNNGGAGGGNGGCTACACCTTCGGTTCGGGGACCAGGTTAACCGTTGTAG	DAGITQSPRYKITETGRQVTLMCHQTWSHSYMFWYRQDLGHGLRLIYYSAAADITDKGEVPDGYVVSRSKTENFPLTLESATRSQTSVYFCASSISALEGGYTFGSGTRLTVV	DAGITQSPRYKITETGRQVTLMCHQTWSHSYMFWYRQDLGHGLRLIYYSAAADITDKGEVPDGYVVSRSKTENFPLTLESATRSQTSVYFCASSXXXXEGGYTFGSGTRLTVV	1	282	294	299	301	340	GATGCTGGAATCACCCAGAGCCCAAGATACAAGATCACAGAGACAGGAAGGCAGGTGACCTTGATGTGTCACCAGACTTGGAGCCACAGCTATATGTTCTGGTATCGACAAGACCTGGGACATGGGCTGAGGCTGATCTATTACTCAGCAGCTGCTGATATTACAGATAAAGGAGAAGTCCCCGATGGCTACGTTGTCTCCAGATCCAAGACAGAGAATTTCCCCCTCACTCTGGAGTCAGCTACCCGCTCCCAGACATCTGTGTATTTCTGCGCCAGCAGT	DAGITQSPRYKITETGRQVTLMCHQTWSHSYMFWYRQDLGHGLRLIYYSAAADITDKGEVPDGYVVSRSKTENFPLTLESATRSQTSVYFCASS	GATGCTGGAATCACCCAGAGCCCAAGATACAAGATCACAGAGACAGGAAGGCAGGTGACCTTGATGTGTCACCAGACTTGGAGCCACAGCTATATGTTCTGGTATCGACAAGACCTGGGACATGGGCTGAGGCTGATCTATTACTCAGCAGCTGCTGATATTACAGATAAAGGAGAAGTCCCCGATGGCTACGTTGTCTCCAGATCCAAGACAGAGAATTTCCCCCTCACTCTGGAGTCAGCTACCCGCTCCCAGACATCTGTGTATTTCTGCGCCAGCAGT	DAGITQSPRYKITETGRQVTLMCHQTWSHSYMFWYRQDLGHGLRLIYYSAAADITDKGEVPDGYVVSRSKTENFPLTLESATRSQTSVYFCASS	GGAGGG	EG	GGAGGG	EG	GGCTACACCTTCGGTTCGGGGACCAGGTTAACCGTTGTAG	GYTFGSGTRLTVV	GGCTACACCTTCGGTTCGGGGACCAGGTTAACCGTTGTAG	GYTFGSGTRLTVV	GATGCTGGAATCACCCAGAGCCCAAGATACAAGATCACAGAGACAGGAAGGCAGGTGACCTTGATGTGTCACCAGACT	DAGITQSPRYKITETGRQVTLMCHQT	TGGAGCCACAGCTAT	WSHSY	ATGTTCTGGTATCGACAAGACCTGGGACATGGGCTGAGGCTGATCTATTAC	MFWYRQDLGHGLRLIYY	TCAGCAGCTGCTGATATT	SAAADI
Pat726	KW11	CATCGGGCATCAGTAC	TCRbeta	tig00000285_CATCGGGCATCAGTAC	1232	196	1	GACACTGAAGTTACCCAGACACCAAAACACCTGGTCATGGGAATGACAAATAAGAAGTCTTTGAAATGTGAACAACATATGGGGCACAGGGCTATGTATTGGTACAAGCAGAAAGCTAAGAAGCCACCGGAGCTCATGTTTGTCTACAGCTATGAGAAACTCTCTATAAATGAAAGTGTGCCAAGTCGCTTCTCACCTGAATGCCCCAACAGCTCTCTCTTAAACCTTCACCTACACGCCCTGCAGCCAGAAGACTCAGCCCTGTATCTCTGCGCCAGCAGCCAAGATGGTTTGAGCTCCTATAATTCACCCCTCCACTTTGGGAACGGGACCAGGCTCACTGTGACAG	DTEVTQTPKHLVMGMTNKKSLKCEQHMGHRAMYWYKQKAKKPPELMFVYSYEKLSINESVPSRFSPECPNSSLLNLHLHALQPEDSALYLCASSQDGLSSYNSPLHFGNGTRLTVT	TRB	F	T	F	T	F	T	TRBV4-1*01		TRBJ1-6*02	GACACTGAAGTTACCCAGACACCAAAACACCTGGTCATGGGAATGACAAATAAGAAGTCTTTGAAATGTGAACAACATATGGGGCACAGGGCTATGTATTGGTACAAGCAGAAAGCTAAGAAGCCACCGGAGCTCATGTTTGTCTACAGCTATGAGAAACTCTCTATAAATGAAAGTGTGCCAAGTCGCTTCTCACCTGAATGCCCCAACAGCTCTCTCTTAAACCTTCACCTACACGCCCTGCAGCCAGAAGACTCAGCCCTGTATCTCTGCGCCAGCAGCCAAGATGGTTTGAGCTCCTATAATTCACCCCTCCACTTTGGGAACGGGACCAGGCTCACTGTGACAG	GACACTGAAGTTACCCAGACACCAAAACACCTGGTCATGGGAATGACAAATAAGAAGTCTTTGAAATGTGAACAACATATGGGGCACAGGGCTATGTATTGGTACAAGCAGAAAGCTAAGAAGCCACCGGAGCTCATGTTTGTCTACAGCTATGAGAAACTCTCTATAAATGAAAGTGTGCCAAGTCGCTTCTCACCTGAATGCCCCAACAGCTCTCTCTTAAACCTTCACCTACACGCCCTGCAGCCAGAAGACTCAGCCCTGTATCTCTGCGCCAGCAGCCAAGANNNNNNNNNCTCCTATAATTCACCCCTCCACTTTGGGAACGGGACCAGGCTCACTGTGACAG	DTEVTQTPKHLVMGMTNKKSLKCEQHMGHRAMYWYKQKAKKPPELMFVYSYEKLSINESVPSRFSPECPNSSLLNLHLHALQPEDSALYLCASSQDGLSSYNSPLHFGNGTRLTVT	DTEVTQTPKHLVMGMTNKKSLKCEQHMGHRAMYWYKQKAKKPPELMFVYSYEKLSINESVPSRFSPECPNSSLLNLHLHALQPEDSALYLCASSQXXXXSYNSPLHFGNGTRLTVT	1	287			297	349	GACACTGAAGTTACCCAGACACCAAAACACCTGGTCATGGGAATGACAAATAAGAAGTCTTTGAAATGTGAACAACATATGGGGCACAGGGCTATGTATTGGTACAAGCAGAAAGCTAAGAAGCCACCGGAGCTCATGTTTGTCTACAGCTATGAGAAACTCTCTATAAATGAAAGTGTGCCAAGTCGCTTCTCACCTGAATGCCCCAACAGCTCTCTCTTAAACCTTCACCTACACGCCCTGCAGCCAGAAGACTCAGCCCTGTATCTCTGCGCCAGCAGCCAAGA	DTEVTQTPKHLVMGMTNKKSLKCEQHMGHRAMYWYKQKAKKPPELMFVYSYEKLSINESVPSRFSPECPNSSLLNLHLHALQPEDSALYLCASSQ	GACACTGAAGTTACCCAGACACCAAAACACCTGGTCATGGGAATGACAAATAAGAAGTCTTTGAAATGTGAACAACATATGGGGCACAGGGCTATGTATTGGTACAAGCAGAAAGCTAAGAAGCCACCGGAGCTCATGTTTGTCTACAGCTATGAGAAACTCTCTATAAATGAAAGTGTGCCAAGTCGCTTCTCACCTGAATGCCCCAACAGCTCTCTCTTAAACCTTCACCTACACGCCCTGCAGCCAGAAGACTCAGCCCTGTATCTCTGCGCCAGCAGCCAAGA	DTEVTQTPKHLVMGMTNKKSLKCEQHMGHRAMYWYKQKAKKPPELMFVYSYEKLSINESVPSRFSPECPNSSLLNLHLHALQPEDSALYLCASSQ					CTCCTATAATTCACCCCTCCACTTTGGGAACGGGACCAGGCTCACTGTGACAG	SYNSPLHFGNGTRLTVT	CTCCTATAATTCACCCCTCCACTTTGGGAACGGGACCAGGCTCACTGTGACAG	SYNSPLHFGNGTRLTVT	GACACTGAAGTTACCCAGACACCAAAACACCTGGTCATGGGAATGACAAATAAGAAGTCTTTGAAATGTGAACAACAT	DTEVTQTPKHLVMGMTNKKSLKCEQH	ATGGGGCACAGGGCT	MGHRA	ATGTATTGGTACAAGCAGAAAGCTAAGAAGCCACCGGAGCTCATGTTTGTC	MYWYKQKAKKPPELMFV	TACAGCTATGAGAAACTC	YSYEKL
Pat726	IW9	CCACCTAAGATGGGTC	TCRbeta	tig00000441_CCACCTAAGATGGGTC	835	187	1	GACACTGAAGTTACCCAGACACCAAAACACCTGGTCATGGGAATGACAAATAAGAAGTCTTTGAAATGTGAACAACATATGGGGCACAGGGCTATGTATTGGTACAAGCAGAAAGCTAAGAAGCCACCGGAGCTCATGTTTGTCTACAGCTATGAGAAACTCTCTATAAATGAAAGTGTGCCAAGTCGCTTCTCACCTGAATGCCCCAACAGCTCTCTCTTAAACCTTCACCTACACGCCCTGCAGCCAGAAGACTCAGCCCTGTATCTCTGCGCCAGCAGCCAAGAAGCGCCAGCGGGGAACACCGGGGAGCTGTTTTTTGGAGAAGGCTCTAGGCTGACCGTACTGG	DTEVTQTPKHLVMGMTNKKSLKCEQHMGHRAMYWYKQKAKKPPELMFVYSYEKLSINESVPSRFSPECPNSSLLNLHLHALQPEDSALYLCASSQEAPAGNTGELFFGEGSRLTVL	TRB	F	T	F	T	F	T	TRBV4-1*01	TRBD2*01	TRBJ2-2*01	GACACTGAAGTTACCCAGACACCAAAACACCTGGTCATGGGAATGACAAATAAGAAGTCTTTGAAATGTGAACAACATATGGGGCACAGGGCTATGTATTGGTACAAGCAGAAAGCTAAGAAGCCACCGGAGCTCATGTTTGTCTACAGCTATGAGAAACTCTCTATAAATGAAAGTGTGCCAAGTCGCTTCTCACCTGAATGCCCCAACAGCTCTCTCTTAAACCTTCACCTACACGCCCTGCAGCCAGAAGACTCAGCCCTGTATCTCTGCGCCAGCAGCCAAGAAGCGCCAGCGGGGAACACCGGGGAGCTGTTTTTTGGAGAAGGCTCTAGGCTGACCGTACTGG	GACACTGAAGTTACCCAGACACCAAAACACCTGGTCATGGGAATGACAAATAAGAAGTCTTTGAAATGTGAACAACATATGGGGCACAGGGCTATGTATTGGTACAAGCAGAAAGCTAAGAAGCCACCGGAGCTCATGTTTGTCTACAGCTATGAGAAACTCTCTATAAATGAAAGTGTGCCAAGTCGCTTCTCACCTGAATGCCCCAACAGCTCTCTCTTAAACCTTCACCTACACGCCCTGCAGCCAGAAGACTCAGCCCTGTATCTCTGCGCCAGCAGCCAAGANNNNNNAGCGGGGAACACCGGGGAGCTGTTTTTTGGAGAAGGCTCTAGGCTGACCGTACTGG	DTEVTQTPKHLVMGMTNKKSLKCEQHMGHRAMYWYKQKAKKPPELMFVYSYEKLSINESVPSRFSPECPNSSLLNLHLHALQPEDSALYLCASSQEAPAGNTGELFFGEGSRLTVL	DTEVTQTPKHLVMGMTNKKSLKCEQHMGHRAMYWYKQKAKKPPELMFVYSYEKLSINESVPSRFSPECPNSSLLNLHLHALQPEDSALYLCASSQXXXAGNTGELFFGEGSRLTVL	1	287	294	299	300	349	GACACTGAAGTTACCCAGACACCAAAACACCTGGTCATGGGAATGACAAATAAGAAGTCTTTGAAATGTGAACAACATATGGGGCACAGGGCTATGTATTGGTACAAGCAGAAAGCTAAGAAGCCACCGGAGCTCATGTTTGTCTACAGCTATGAGAAACTCTCTATAAATGAAAGTGTGCCAAGTCGCTTCTCACCTGAATGCCCCAACAGCTCTCTCTTAAACCTTCACCTACACGCCCTGCAGCCAGAAGACTCAGCCCTGTATCTCTGCGCCAGCAGCCAAGA	DTEVTQTPKHLVMGMTNKKSLKCEQHMGHRAMYWYKQKAKKPPELMFVYSYEKLSINESVPSRFSPECPNSSLLNLHLHALQPEDSALYLCASSQ	GACACTGAAGTTACCCAGACACCAAAACACCTGGTCATGGGAATGACAAATAAGAAGTCTTTGAAATGTGAACAACATATGGGGCACAGGGCTATGTATTGGTACAAGCAGAAAGCTAAGAAGCCACCGGAGCTCATGTTTGTCTACAGCTATGAGAAACTCTCTATAAATGAAAGTGTGCCAAGTCGCTTCTCACCTGAATGCCCCAACAGCTCTCTCTTAAACCTTCACCTACACGCCCTGCAGCCAGAAGACTCAGCCCTGTATCTCTGCGCCAGCAGCCAAGA	DTEVTQTPKHLVMGMTNKKSLKCEQHMGHRAMYWYKQKAKKPPELMFVYSYEKLSINESVPSRFSPECPNSSLLNLHLHALQPEDSALYLCASSQ	AGCGGG	AG	AGCGGG	AG	GAACACCGGGGAGCTGTTTTTTGGAGAAGGCTCTAGGCTGACCGTACTGG	NTGELFFGEGSRLTVL	GAACACCGGGGAGCTGTTTTTTGGAGAAGGCTCTAGGCTGACCGTACTGG	NTGELFFGEGSRLTVL	GACACTGAAGTTACCCAGACACCAAAACACCTGGTCATGGGAATGACAAATAAGAAGTCTTTGAAATGTGAACAACAT	DTEVTQTPKHLVMGMTNKKSLKCEQH	ATGGGGCACAGGGCT	MGHRA	ATGTATTGGTACAAGCAGAAAGCTAAGAAGCCACCGGAGCTCATGTTTGTC	MYWYKQKAKKPPELMFV	TACAGCTATGAGAAACTC	YSYEKL
Pat726	TW10	CCGGTAGCATTGAGCT	TCRbeta	tig00000485_CCGGTAGCATTGAGCT	784	30	1	GACACTGAAGTTACCCAGACACCAAAACACCTGGTCATGGGAATGACAAATAAGAAGTCTTTGAAATGTGAACAACATATGGGGCACAGGGCTATGTATTGGTACAAGCAGAAAGCTAAGAAGCCACCGGAGCTCATGTTTGTCTACAGCTATGAGAAACTCTCTATAAATGAAAGTGTGCCAAGTCGCTTCTCACCTGAATGCCCCAACAGCTCTCTCTTAAACCTTCACCTACACGCCCTGCAGCCAGAAGACTCAGCCCTGTATCTCTGCGCCAGCAGCCCTCGACAGGGACGAGACACTGAAGCTTTCTTTGGACAAGGCACCAGACTCACTGTTGTAG	DTEVTQTPKHLVMGMTNKKSLKCEQHMGHRAMYWYKQKAKKPPELMFVYSYEKLSINESVPSRFSPECPNSSLLNLHLHALQPEDSALYLCASSPRQGRDTEAFFGQGTRLTVV	TRB	F	T	F	T	F	T	TRBV4-1*01	TRBD1*01	TRBJ1-1*01	GACACTGAAGTTACCCAGACACCAAAACACCTGGTCATGGGAATGACAAATAAGAAGTCTTTGAAATGTGAACAACATATGGGGCACAGGGCTATGTATTGGTACAAGCAGAAAGCTAAGAAGCCACCGGAGCTCATGTTTGTCTACAGCTATGAGAAACTCTCTATAAATGAAAGTGTGCCAAGTCGCTTCTCACCTGAATGCCCCAACAGCTCTCTCTTAAACCTTCACCTACACGCCCTGCAGCCAGAAGACTCAGCCCTGTATCTCTGCGCCAGCAGCCCTCGACAGGGACGAGACACTGAAGCTTTCTTTGGACAAGGCACCAGACTCACTGTTGTAG	GACACTGAAGTTACCCAGACACCAAAACACCTGGTCATGGGAATGACAAATAAGAAGTCTTTGAAATGTGAACAACATATGGGGCACAGGGCTATGTATTGGTACAAGCAGAAAGCTAAGAAGCCACCGGAGCTCATGTTTGTCTACAGCTATGAGAAACTCTCTATAAATGAAAGTGTGCCAAGTCGCTTCTCACCTGAATGCCCCAACAGCTCTCTCTTAAACCTTCACCTACACGCCCTGCAGCCAGAAGACTCAGCCCTGTATCTCTGCGCCAGCAGCCNNNGACAGGGNNNNNACACTGAAGCTTTCTTTGGACAAGGCACCAGACTCACAGTTGTAG	DTEVTQTPKHLVMGMTNKKSLKCEQHMGHRAMYWYKQKAKKPPELMFVYSYEKLSINESVPSRFSPECPNSSLLNLHLHALQPEDSALYLCASSPRQGRDTEAFFGQGTRLTVV	DTEVTQTPKHLVMGMTNKKSLKCEQHMGHRAMYWYKQKAKKPPELMFVYSYEKLSINESVPSRFSPECPNSSLLNLHLHALQPEDSALYLCASSXXQGXXTEAFFGQGTRLTVV	1	283	287	293	299	343	GACACTGAAGTTACCCAGACACCAAAACACCTGGTCATGGGAATGACAAATAAGAAGTCTTTGAAATGTGAACAACATATGGGGCACAGGGCTATGTATTGGTACAAGCAGAAAGCTAAGAAGCCACCGGAGCTCATGTTTGTCTACAGCTATGAGAAACTCTCTATAAATGAAAGTGTGCCAAGTCGCTTCTCACCTGAATGCCCCAACAGCTCTCTCTTAAACCTTCACCTACACGCCCTGCAGCCAGAAGACTCAGCCCTGTATCTCTGCGCCAGCAGCC	DTEVTQTPKHLVMGMTNKKSLKCEQHMGHRAMYWYKQKAKKPPELMFVYSYEKLSINESVPSRFSPECPNSSLLNLHLHALQPEDSALYLCASS	GACACTGAAGTTACCCAGACACCAAAACACCTGGTCATGGGAATGACAAATAAGAAGTCTTTGAAATGTGAACAACATATGGGGCACAGGGCTATGTATTGGTACAAGCAGAAAGCTAAGAAGCCACCGGAGCTCATGTTTGTCTACAGCTATGAGAAACTCTCTATAAATGAAAGTGTGCCAAGTCGCTTCTCACCTGAATGCCCCAACAGCTCTCTCTTAAACCTTCACCTACACGCCCTGCAGCCAGAAGACTCAGCCCTGTATCTCTGCGCCAGCAGCC	DTEVTQTPKHLVMGMTNKKSLKCEQHMGHRAMYWYKQKAKKPPELMFVYSYEKLSINESVPSRFSPECPNSSLLNLHLHALQPEDSALYLCASS	GACAGGG	QG	GACAGGG	QG	ACACTGAAGCTTTCTTTGGACAAGGCACCAGACTCACTGTTGTAG	TEAFFGQGTRLTVV	ACACTGAAGCTTTCTTTGGACAAGGCACCAGACTCACAGTTGTAG	TEAFFGQGTRLTVV	GACACTGAAGTTACCCAGACACCAAAACACCTGGTCATGGGAATGACAAATAAGAAGTCTTTGAAATGTGAACAACAT	DTEVTQTPKHLVMGMTNKKSLKCEQH	ATGGGGCACAGGGCT	MGHRA	ATGTATTGGTACAAGCAGAAAGCTAAGAAGCCACCGGAGCTCATGTTTGTC	MYWYKQKAKKPPELMFV	TACAGCTATGAGAAACTC	YSYEKL
Pat726	IW9	CGACCTTTCACAATGC	TCRbeta	tig00000008_CGACCTTTCACAATGC	900	269	1	GATACTGGAGTCTCCCAGGACCCCAGACACAAGATCACAAAGAGGGGACAGAATGTAACTTTCAGGTGTGATCCAATTTCTGAACACAACCGCCTTTATTGGTACCGACAGACCCTGGGGCAGGGCCCAGAGTTTCTGACTTACTTCCAGAATGAAGCTCAACTAGAAAAATCAAGGCTGCTCAGTGATCGGTTCTCTGCAGAGAGGCCTAAGGGATCTCTCTCCACCTTGGAGATCCAGCGCACAGAGCAGGGGGACTCGGCCATGTATCTCTGTGCCAGCAGCTTAGGGGGCAAGGCAACATGGCAGTTCTTTGGGCCAGGCACCCGGCTCACCGTGCTAG	DTGVSQDPRHKITKRGQNVTFRCDPISEHNRLYWYRQTLGQGPEFLTYFQNEAQLEKSRLLSDRFSAERPKGSLSTLEIQRTEQGDSAMYLCASSLGGKATWQFFGPGTRLTVL	TRB	F	T	F	T	F	T	TRBV7-9*03	TRBD1*01	TRBJ2-1*01	GATACTGGAGTCTCCCAGGACCCCAGACACAAGATCACAAAGAGGGGACAGAATGTAACTTTCAGGTGTGATCCAATTTCTGAACACAACCGCCTTTATTGGTACCGACAGACCCTGGGGCAGGGCCCAGAGTTTCTGACTTACTTCCAGAATGAAGCTCAACTAGAAAAATCAAGGCTGCTCAGTGATCGGTTCTCTGCAGAGAGGCCTAAGGGATCTCTCTCCACCTTGGAGATCCAGCGCACAGAGCAGGGGGACTCGGCCATGTATCTCTGTGCCAGCAGCTTAGGGGGCAAGGCAACATGGCAGTTCTTTGGGCCAGGCACCCGGCTCACCGTGCTAG	GATACTGGAGTCTCCCAGGACCCCAGACACAAGATCACAAAGAGGGGACAGAATGTAACTTTCAGGTGTGATCCAATTTCTGAACACAACCGCCTTTATTGGTACCGACAGACCCTGGGGCAGGGCCCAGAGTTTCTGACTTACTTCCAGAATGAAGCTCAACTAGAAAAATCAAGGCTGCTCAGTGATCGGTTCTCTGCAGAGAGGCCTAAGGGATCTTTCTCCACCTTGGAGATCCAGCGCACAGAGCAGGGGGACTCGGCCATGTATCTCTGTGCCAGCAGCTTAGGGGGCNNNNNNNNNNNGCAGTTCTTCGGGCCAGGGACACGGCTCACCGTGCTAG	DTGVSQDPRHKITKRGQNVTFRCDPISEHNRLYWYRQTLGQGPEFLTYFQNEAQLEKSRLLSDRFSAERPKGSLSTLEIQRTEQGDSAMYLCASSLGGKATWQFFGPGTRLTVL	DTGVSQDPRHKITKRGQNVTFRCDPISEHNRLYWYRQTLGQGPEFLTYFQNEAQLEKSRLLSDRFSAERPKGSFSTLEIQRTEQGDSAMYLCASSLGGXXXXQFFGPGTRLTVL	1	289	290	294	306	343	GATACTGGAGTCTCCCAGGACCCCAGACACAAGATCACAAAGAGGGGACAGAATGTAACTTTCAGGTGTGATCCAATTTCTGAACACAACCGCCTTTATTGGTACCGACAGACCCTGGGGCAGGGCCCAGAGTTTCTGACTTACTTCCAGAATGAAGCTCAACTAGAAAAATCAAGGCTGCTCAGTGATCGGTTCTCTGCAGAGAGGCCTAAGGGATCTCTCTCCACCTTGGAGATCCAGCGCACAGAGCAGGGGGACTCGGCCATGTATCTCTGTGCCAGCAGCTTAG	DTGVSQDPRHKITKRGQNVTFRCDPISEHNRLYWYRQTLGQGPEFLTYFQNEAQLEKSRLLSDRFSAERPKGSLSTLEIQRTEQGDSAMYLCASSL	GATACTGGAGTCTCCCAGGACCCCAGACACAAGATCACAAAGAGGGGACAGAATGTAACTTTCAGGTGTGATCCAATTTCTGAACACAACCGCCTTTATTGGTACCGACAGACCCTGGGGCAGGGCCCAGAGTTTCTGACTTACTTCCAGAATGAAGCTCAACTAGAAAAATCAAGGCTGCTCAGTGATCGGTTCTCTGCAGAGAGGCCTAAGGGATCTTTCTCCACCTTGGAGATCCAGCGCACAGAGCAGGGGGACTCGGCCATGTATCTCTGTGCCAGCAGCTTAG	DTGVSQDPRHKITKRGQNVTFRCDPISEHNRLYWYRQTLGQGPEFLTYFQNEAQLEKSRLLSDRFSAERPKGSFSTLEIQRTEQGDSAMYLCASSL	GGGGC	G	GGGGC	G	GCAGTTCTTTGGGCCAGGCACCCGGCTCACCGTGCTAG	QFFGPGTRLTVL	GCAGTTCTTCGGGCCAGGGACACGGCTCACCGTGCTAG	QFFGPGTRLTVL	GATACTGGAGTCTCCCAGGACCCCAGACACAAGATCACAAAGAGGGGACAGAATGTAACTTTCAGGTGTGATCCAATT	DTGVSQDPRHKITKRGQNVTFRCDPI	TCTGAACACAACCGC	SEHNR	CTTTATTGGTACCGACAGACCCTGGGGCAGGGCCCAGAGTTTCTGACTTAC	LYWYRQTLGQGPEFLTY	TTCCAGAATGAAGCTCAA	FQNEAQ
Pat726	IW9	CGTTAGACAACAACCT	TCRbeta	tig00000007_CGTTAGACAACAACCT	911	166	1	GACACTGAAGTTACCCAGACACCAAAACACCTGGTCATGGGAATGACAAATAAGAAGTCTTTGAAATGTGAACAACATATGGGGCACAGGGCTATGTATTGGTACAAGCAGAAAGCTAAGAAGCCACCGGAGCTCATGTTTGTCTACAGCTATGAGAAACTCTCTATAAATGAAAGTGTGCCAAGTCGCTTCTCACCTGAATGCCCCAACAGCTCTCTCTTAAACCTTCACCTACACGCCCTGCAGCCAGAAGACTCAGCCCTGTATCTCTGCGCCAGCAGCCAGCTACAGACCACCGGGGAGCTGTTTTTTGGAGAAGGCTCTAGGCTGACCGTACTGG	DTEVTQTPKHLVMGMTNKKSLKCEQHMGHRAMYWYKQKAKKPPELMFVYSYEKLSINESVPSRFSPECPNSSLLNLHLHALQPEDSALYLCASSQLQTTGELFFGEGSRLTVL	TRB	F	T	F	T	F	T	TRBV4-1*01		TRBJ2-2*01	GACACTGAAGTTACCCAGACACCAAAACACCTGGTCATGGGAATGACAAATAAGAAGTCTTTGAAATGTGAACAACATATGGGGCACAGGGCTATGTATTGGTACAAGCAGAAAGCTAAGAAGCCACCGGAGCTCATGTTTGTCTACAGCTATGAGAAACTCTCTATAAATGAAAGTGTGCCAAGTCGCTTCTCACCTGAATGCCCCAACAGCTCTCTCTTAAACCTTCACCTACACGCCCTGCAGCCAGAAGACTCAGCCCTGTATCTCTGCGCCAGCAGCCAGCTACAGACCACCGGGGAGCTGTTTTTTGGAGAAGGCTCTAGGCTGACCGTACTGG	GACACTGAAGTTACCCAGACACCAAAACACCTGGTCATGGGAATGACAAATAAGAAGTCTTTGAAATGTGAACAACATATGGGGCACAGGGCTATGTATTGGTACAAGCAGAAAGCTAAGAAGCCACCGGAGCTCATGTTTGTCTACAGCTATGAGAAACTCTCTATAAATGAAAGTGTGCCAAGTCGCTTCTCACCTGAATGCCCCAACAGCTCTCTCTTAAACCTTCACCTACACGCCCTGCAGCCAGAAGACTCAGCCCTGTATCTCTGCGCCAGCAGCCANNNNNNNNNCACCGGGGAGCTGTTTTTTGGAGAAGGCTCTAGGCTGACCGTACTGG	DTEVTQTPKHLVMGMTNKKSLKCEQHMGHRAMYWYKQKAKKPPELMFVYSYEKLSINESVPSRFSPECPNSSLLNLHLHALQPEDSALYLCASSQLQTTGELFFGEGSRLTVL	DTEVTQTPKHLVMGMTNKKSLKCEQHMGHRAMYWYKQKAKKPPELMFVYSYEKLSINESVPSRFSPECPNSSLLNLHLHALQPEDSALYLCASSXXXXTGELFFGEGSRLTVL	1	284			294	340	GACACTGAAGTTACCCAGACACCAAAACACCTGGTCATGGGAATGACAAATAAGAAGTCTTTGAAATGTGAACAACATATGGGGCACAGGGCTATGTATTGGTACAAGCAGAAAGCTAAGAAGCCACCGGAGCTCATGTTTGTCTACAGCTATGAGAAACTCTCTATAAATGAAAGTGTGCCAAGTCGCTTCTCACCTGAATGCCCCAACAGCTCTCTCTTAAACCTTCACCTACACGCCCTGCAGCCAGAAGACTCAGCCCTGTATCTCTGCGCCAGCAGCCA	DTEVTQTPKHLVMGMTNKKSLKCEQHMGHRAMYWYKQKAKKPPELMFVYSYEKLSINESVPSRFSPECPNSSLLNLHLHALQPEDSALYLCASS	GACACTGAAGTTACCCAGACACCAAAACACCTGGTCATGGGAATGACAAATAAGAAGTCTTTGAAATGTGAACAACATATGGGGCACAGGGCTATGTATTGGTACAAGCAGAAAGCTAAGAAGCCACCGGAGCTCATGTTTGTCTACAGCTATGAGAAACTCTCTATAAATGAAAGTGTGCCAAGTCGCTTCTCACCTGAATGCCCCAACAGCTCTCTCTTAAACCTTCACCTACACGCCCTGCAGCCAGAAGACTCAGCCCTGTATCTCTGCGCCAGCAGCCA	DTEVTQTPKHLVMGMTNKKSLKCEQHMGHRAMYWYKQKAKKPPELMFVYSYEKLSINESVPSRFSPECPNSSLLNLHLHALQPEDSALYLCASS					CACCGGGGAGCTGTTTTTTGGAGAAGGCTCTAGGCTGACCGTACTGG	TGELFFGEGSRLTVL	CACCGGGGAGCTGTTTTTTGGAGAAGGCTCTAGGCTGACCGTACTGG	TGELFFGEGSRLTVL	GACACTGAAGTTACCCAGACACCAAAACACCTGGTCATGGGAATGACAAATAAGAAGTCTTTGAAATGTGAACAACAT	DTEVTQTPKHLVMGMTNKKSLKCEQH	ATGGGGCACAGGGCT	MGHRA	ATGTATTGGTACAAGCAGAAAGCTAAGAAGCCACCGGAGCTCATGTTTGTC	MYWYKQKAKKPPELMFV	TACAGCTATGAGAAACTC	YSYEKL
Pat726	KW11	CGTTCTGTCAAGGTAA	TCRbeta	tig00000317_CGTTCTGTCAAGGTAA	1031	84	1	GGTGCTGGAGTCTCCCAGTCCCCTAGGTACAAAGTCGCAAAGAGAGGACAGGATGTAGCTCTCAGGTGTGATCCAATTTCGGGTCATGTATCCCTTTTTTGGTACCAACAGGCCCTGGGGCAGGGGCCAGAGTTTCTGACTTATTTCCAGAATGAAGCTCAACTAGACAAATCGGGGCTGCCCAGTGATCGCTTCTTTGCAGAAAGGCCTGAGGGATCCGTCTCCACTCTGAAGATCCAGCGCACACAGCAGGAGGACTCCGCCGTGTATCTCTGTGCCAGCAGTATCGATACAGGGGATCCTGAAGCTTTCTTTGGACAAGGCACCAGACTCACAGTTGTAG	GAGVSQSPRYKVAKRGQDVALRCDPISGHVSLFWYQQALGQGPEFLTYFQNEAQLDKSGLPSDRFFAERPEGSVSTLKIQRTQQEDSAVYLCASSIDTGDPEAFFGQGTRLTVV	TRB	F	T	F	T	F	T	TRBV7-8*01	TRBD1*01	TRBJ1-1*01	GGTGCTGGAGTCTCCCAGTCCCCTAGGTACAAAGTCGCAAAGAGAGGACAGGATGTAGCTCTCAGGTGTGATCCAATTTCGGGTCATGTATCCCTTTTTTGGTACCAACAGGCCCTGGGGCAGGGGCCAGAGTTTCTGACTTATTTCCAGAATGAAGCTCAACTAGACAAATCGGGGCTGCCCAGTGATCGCTTCTTTGCAGAAAGGCCTGAGGGATCCGTCTCCACTCTGAAGATCCAGCGCACACAGCAGGAGGACTCCGCCGTGTATCTCTGTGCCAGCAGTATCGATACAGGGGATCCTGAAGCTTTCTTTGGACAAGGCACCAGACTCACAGTTGTAG	GGTGCTGGAGTCTCCCAGTCCCCTAGGTACAAAGTCGCAAAGAGAGGACAGGATGTAGCTCTCAGGTGTGATCCAATTTCGGGTCATGTATCCCTTTTTTGGTACCAACAGGCCCTGGGGCAGGGGCCAGAGTTTCTGACTTATTTCCAGAATGAAGCTCAACTAGACAAATCGGGGCTGCCCAGTGATCGCTTCTTTGCAGAAAGGCCTGAGGGATCCGTCTCCACTCTGAAGATCCAGCGCACACAGCAGGAGGACTCCGCCGTGTATCTCTGTGCCAGCAGNNNNNNNACAGGGGNNNCTGAAGCTTTCTTTGGACAAGGCACCAGACTCACAGTTGTAG	GAGVSQSPRYKVAKRGQDVALRCDPISGHVSLFWYQQALGQGPEFLTYFQNEAQLDKSGLPSDRFFAERPEGSVSTLKIQRTQQEDSAVYLCASSIDTGDPEAFFGQGTRLTVV	GAGVSQSPRYKVAKRGQDVALRCDPISGHVSLFWYQQALGQGPEFLTYFQNEAQLDKSGLPSDRFFAERPEGSVSTLKIQRTQQEDSAVYLCASXXXTGXXEAFFGQGTRLTVV	1	284	292	298	302	343	GGTGCTGGAGTCTCCCAGTCCCCTAGGTACAAAGTCGCAAAGAGAGGACAGGATGTAGCTCTCAGGTGTGATCCAATTTCGGGTCATGTATCCCTTTTTTGGTACCAACAGGCCCTGGGGCAGGGGCCAGAGTTTCTGACTTATTTCCAGAATGAAGCTCAACTAGACAAATCGGGGCTGCCCAGTGATCGCTTCTTTGCAGAAAGGCCTGAGGGATCCGTCTCCACTCTGAAGATCCAGCGCACACAGCAGGAGGACTCCGCCGTGTATCTCTGTGCCAGCAG	GAGVSQSPRYKVAKRGQDVALRCDPISGHVSLFWYQQALGQGPEFLTYFQNEAQLDKSGLPSDRFFAERPEGSVSTLKIQRTQQEDSAVYLCAS	GGTGCTGGAGTCTCCCAGTCCCCTAGGTACAAAGTCGCAAAGAGAGGACAGGATGTAGCTCTCAGGTGTGATCCAATTTCGGGTCATGTATCCCTTTTTTGGTACCAACAGGCCCTGGGGCAGGGGCCAGAGTTTCTGACTTATTTCCAGAATGAAGCTCAACTAGACAAATCGGGGCTGCCCAGTGATCGCTTCTTTGCAGAAAGGCCTGAGGGATCCGTCTCCACTCTGAAGATCCAGCGCACACAGCAGGAGGACTCCGCCGTGTATCTCTGTGCCAGCAG	GAGVSQSPRYKVAKRGQDVALRCDPISGHVSLFWYQQALGQGPEFLTYFQNEAQLDKSGLPSDRFFAERPEGSVSTLKIQRTQQEDSAVYLCAS	ACAGGGG	TG	ACAGGGG	TG	CTGAAGCTTTCTTTGGACAAGGCACCAGACTCACAGTTGTAG	EAFFGQGTRLTVV	CTGAAGCTTTCTTTGGACAAGGCACCAGACTCACAGTTGTAG	EAFFGQGTRLTVV	GGTGCTGGAGTCTCCCAGTCCCCTAGGTACAAAGTCGCAAAGAGAGGACAGGATGTAGCTCTCAGGTGTGATCCAATT	GAGVSQSPRYKVAKRGQDVALRCDPI	TCGGGTCATGTATCC	SGHVS	CTTTTTTGGTACCAACAGGCCCTGGGGCAGGGGCCAGAGTTTCTGACTTAT	LFWYQQALGQGPEFLTY	TTCCAGAATGAAGCTCAA	FQNEAQ
Pat726	KW11	CGTTGGGGTGTATGGG	TCRbeta	tig00000004_CGTTGGGGTGTATGGG	895	500	1	AATGCTGGTGTCACTCAGACCCCAAAATTCCAGGTCCTGAAGACAGGACAGAGCATGACACTGCAGTGTGCCCAGGATATGAACCATGAATACATGTCCTGGTATCGACAAGACCCAGGCATGGGGCTGAGGCTGATTCATTACTCAGTTGGTGCTGGTATCACTGACCAAGGAGAAGTCCCCAATGGCTACAATGTCTCCAGATCAACCACAGAGGATTTCCCGCTCAGGCTGCTGTCGGCTGCTCCCTCCCAGACATCTGTGTACTTCTGTGCCAGCAGTTCTTCCCTGAACGGACAGGGGGCCCTGAACACTGAAGCTTTCTTTGGACAAGGCACCAGACTCACAGTTGTAG	NAGVTQTPKFQVLKTGQSMTLQCAQDMNHEYMSWYRQDPGMGLRLIHYSVGAGITDQGEVPNGYNVSRSTTEDFPLRLLSAAPSQTSVYFCASSSSLNGQGALNTEAFFGQGTRLTVV	TRB	F	T	F	T	F	T	TRBV6-5*01	TRBD1*01	TRBJ1-1*01	AATGCTGGTGTCACTCAGACCCCAAAATTCCAGGTCCTGAAGACAGGACAGAGCATGACACTGCAGTGTGCCCAGGATATGAACCATGAATACATGTCCTGGTATCGACAAGACCCAGGCATGGGGCTGAGGCTGATTCATTACTCAGTTGGTGCTGGTATCACTGACCAAGGAGAAGTCCCCAATGGCTACAATGTCTCCAGATCAACCACAGAGGATTTCCCGCTCAGGCTGCTGTCGGCTGCTCCCTCCCAGACATCTGTGTACTTCTGTGCCAGCAGTTCTTCCCTGAACGGACAGGGGGCCCTGAACACTGAAGCTTTCTTTGGACAAGGCACCAGACTCACAGTTGTAG	AATGCTGGTGTCACTCAGACCCCAAAATTCCAGGTCCTGAAGACAGGACAGAGCATGACACTGCAGTGTGCCCAGGATATGAACCATGAATACATGTCCTGGTATCGACAAGACCCAGGCATGGGGCTGAGGCTGATTCATTACTCAGTTGGTGCTGGTATCACTGACCAAGGAGAAGTCCCCAATGGCTACAATGTCTCCAGATCAACCACAGAGGATTTCCCGCTCAGGCTGCTGTCGGCTGCTCCCTCCCAGACATCTGTGTACTTCTGTGCCAGCAGTTNNNNNNNNNNNGGACAGGGGGCNNTGAACACTGAAGCTTTCTTTGGACAAGGCACCAGACTCACAGTTGTAG	NAGVTQTPKFQVLKTGQSMTLQCAQDMNHEYMSWYRQDPGMGLRLIHYSVGAGITDQGEVPNGYNVSRSTTEDFPLRLLSAAPSQTSVYFCASSSSLNGQGALNTEAFFGQGTRLTVV	NAGVTQTPKFQVLKTGQSMTLQCAQDMNHEYMSWYRQDPGMGLRLIHYSVGAGITDQGEVPNGYNVSRSTTEDFPLRLLSAAPSQTSVYFCASSXXXXGQGAXNTEAFFGQGTRLTVV	1	283	295	305	308	355	AATGCTGGTGTCACTCAGACCCCAAAATTCCAGGTCCTGAAGACAGGACAGAGCATGACACTGCAGTGTGCCCAGGATATGAACCATGAATACATGTCCTGGTATCGACAAGACCCAGGCATGGGGCTGAGGCTGATTCATTACTCAGTTGGTGCTGGTATCACTGACCAAGGAGAAGTCCCCAATGGCTACAATGTCTCCAGATCAACCACAGAGGATTTCCCGCTCAGGCTGCTGTCGGCTGCTCCCTCCCAGACATCTGTGTACTTCTGTGCCAGCAGTT	NAGVTQTPKFQVLKTGQSMTLQCAQDMNHEYMSWYRQDPGMGLRLIHYSVGAGITDQGEVPNGYNVSRSTTEDFPLRLLSAAPSQTSVYFCASS	AATGCTGGTGTCACTCAGACCCCAAAATTCCAGGTCCTGAAGACAGGACAGAGCATGACACTGCAGTGTGCCCAGGATATGAACCATGAATACATGTCCTGGTATCGACAAGACCCAGGCATGGGGCTGAGGCTGATTCATTACTCAGTTGGTGCTGGTATCACTGACCAAGGAGAAGTCCCCAATGGCTACAATGTCTCCAGATCAACCACAGAGGATTTCCCGCTCAGGCTGCTGTCGGCTGCTCCCTCCCAGACATCTGTGTACTTCTGTGCCAGCAGTT	NAGVTQTPKFQVLKTGQSMTLQCAQDMNHEYMSWYRQDPGMGLRLIHYSVGAGITDQGEVPNGYNVSRSTTEDFPLRLLSAAPSQTSVYFCASS	GGACAGGGGGC	GQGA	GGACAGGGGGC	GQGA	TGAACACTGAAGCTTTCTTTGGACAAGGCACCAGACTCACAGTTGTAG	NTEAFFGQGTRLTVV	TGAACACTGAAGCTTTCTTTGGACAAGGCACCAGACTCACAGTTGTAG	NTEAFFGQGTRLTVV	AATGCTGGTGTCACTCAGACCCCAAAATTCCAGGTCCTGAAGACAGGACAGAGCATGACACTGCAGTGTGCCCAGGAT	NAGVTQTPKFQVLKTGQSMTLQCAQD	ATGAACCATGAATAC	MNHEY	ATGTCCTGGTATCGACAAGACCCAGGCATGGGGCTGAGGCTGATTCATTAC	MSWYRQDPGMGLRLIHY	TCAGTTGGTGCTGGTATC	SVGAGI
Pat726	IW9	CTCGGAGAGCACCGCT	TCRbeta	tig00000003_CTCGGAGAGCACCGCT	607	275	1	GAACCTGAAGTCACCCAGACTCCCAGCCATCAGGTCACACAGATGGGACAGGAAGTGATCTTGCGCTGTGTCCCCATCTCTAATCACTTATACTTCTATTGGTACAGACAAATCTTGGGGCAGAAAGTCGAGTTTCTGGTTTCCTTTTATAATAATGAAATCTCAGAGAAGTCTGAAATATTCGATGATCAATTCTCAGTTGAAAGGCCTGATGGATCAAATTTCACTCTGAAGATCCGGTCCACAAAGCTGGAGGACTCAGCCATGTACTTCTGTGCCAGCAGTGAAGGGGCCCGGGACTATGGCTACACCTTCGGTTCGGGGACCAGGTTAACCGTTGTAG	EPEVTQTPSHQVTQMGQEVILRCVPISNHLYFYWYRQILGQKVEFLVSFYNNEISEKSEIFDDQFSVERPDGSNFTLKIRSTKLEDSAMYFCASSEGARDYGYTFGSGTRLTVV	TRB	F	T	F	T	F	T	TRBV2*01		TRBJ1-2*01	GAACCTGAAGTCACCCAGACTCCCAGCCATCAGGTCACACAGATGGGACAGGAAGTGATCTTGCGCTGTGTCCCCATCTCTAATCACTTATACTTCTATTGGTACAGACAAATCTTGGGGCAGAAAGTCGAGTTTCTGGTTTCCTTTTATAATAATGAAATCTCAGAGAAGTCTGAAATATTCGATGATCAATTCTCAGTTGAAAGGCCTGATGGATCAAATTTCACTCTGAAGATCCGGTCCACAAAGCTGGAGGACTCAGCCATGTACTTCTGTGCCAGCAGTGAAGGGGCCCGGGACTATGGCTACACCTTCGGTTCGGGGACCAGGTTAACCGTTGTAG	GAACCTGAAGTCACCCAGACTCCCAGCCATCAGGTCACACAGATGGGACAGGAAGTGATCTTGCGCTGTGTCCCCATCTCTAATCACTTATACTTCTATTGGTACAGACAAATCTTGGGGCAGAAAGTCGAGTTTCTGGTTTCCTTTTATAATAATGAAATCTCAGAGAAGTCTGAAATATTCGATGATCAATTCTCAGTTGAAAGGCCTGATGGATCAAATTTCACTCTGAAGATCCGGTCCACAAAGCTGGAGGACTCAGCCATGTACTTCTGTGCCAGCAGTGAAGNNNNNNNNNACTATGGCTACACCTTCGGTTCGGGGACCAGGTTAACCGTTGTAG	EPEVTQTPSHQVTQMGQEVILRCVPISNHLYFYWYRQILGQKVEFLVSFYNNEISEKSEIFDDQFSVERPDGSNFTLKIRSTKLEDSAMYFCASSEGARDYGYTFGSGTRLTVV	EPEVTQTPSHQVTQMGQEVILRCVPISNHLYFYWYRQILGQKVEFLVSFYNNEISEKSEIFDDQFSVERPDGSNFTLKIRSTKLEDSAMYFCASSEXXXXYGYTFGSGTRLTVV	1	289			299	343	GAACCTGAAGTCACCCAGACTCCCAGCCATCAGGTCACACAGATGGGACAGGAAGTGATCTTGCGCTGTGTCCCCATCTCTAATCACTTATACTTCTATTGGTACAGACAAATCTTGGGGCAGAAAGTCGAGTTTCTGGTTTCCTTTTATAATAATGAAATCTCAGAGAAGTCTGAAATATTCGATGATCAATTCTCAGTTGAAAGGCCTGATGGATCAAATTTCACTCTGAAGATCCGGTCCACAAAGCTGGAGGACTCAGCCATGTACTTCTGTGCCAGCAGTGAAG	EPEVTQTPSHQVTQMGQEVILRCVPISNHLYFYWYRQILGQKVEFLVSFYNNEISEKSEIFDDQFSVERPDGSNFTLKIRSTKLEDSAMYFCASSE	GAACCTGAAGTCACCCAGACTCCCAGCCATCAGGTCACACAGATGGGACAGGAAGTGATCTTGCGCTGTGTCCCCATCTCTAATCACTTATACTTCTATTGGTACAGACAAATCTTGGGGCAGAAAGTCGAGTTTCTGGTTTCCTTTTATAATAATGAAATCTCAGAGAAGTCTGAAATATTCGATGATCAATTCTCAGTTGAAAGGCCTGATGGATCAAATTTCACTCTGAAGATCCGGTCCACAAAGCTGGAGGACTCAGCCATGTACTTCTGTGCCAGCAGTGAAG	EPEVTQTPSHQVTQMGQEVILRCVPISNHLYFYWYRQILGQKVEFLVSFYNNEISEKSEIFDDQFSVERPDGSNFTLKIRSTKLEDSAMYFCASSE					ACTATGGCTACACCTTCGGTTCGGGGACCAGGTTAACCGTTGTAG	YGYTFGSGTRLTVV	ACTATGGCTACACCTTCGGTTCGGGGACCAGGTTAACCGTTGTAG	YGYTFGSGTRLTVV	GAACCTGAAGTCACCCAGACTCCCAGCCATCAGGTCACACAGATGGGACAGGAAGTGATCTTGCGCTGTGTCCCCATC	EPEVTQTPSHQVTQMGQEVILRCVPI	TCTAATCACTTATAC	SNHLY	TTCTATTGGTACAGACAAATCTTGGGGCAGAAAGTCGAGTTTCTGGTTTCC	FYWYRQILGQKVEFLVS	TTTTATAATAATGAAATC	FYNNEI
Pat726	KW11	CTCGGAGGTCGTTGTA	TCRbeta	tig00000369_CTCGGAGGTCGTTGTA	938	107	1	AAGGCTGGAGTCACTCAAACTCCAAGATATCTGATCAAAACGAGAGGACAGCAAGTGACACTGAGCTGCTCCCCTATCTCTGGGCATAGGAGTGTATCCTGGTACCAACAGACCCCAGGACAGGGCCTTCAGTTCCTCTTTGAATACTTCAGTGAGACACAGAGAAACAAAGGAAACTTCCCTGGTCGATTCTCAGGGCGCCAGTTCTCTAACTCTCGCTCTGAGATGAATGTGAGCACCTTGGAGCTGGGGGACTCGGCCCTTTATCTTTGCGCCAGCAGCTTGCCGGGACAGGCCCTTCCGTACCAAGAGACCCAGTACTTCGGGCCAGGCACGCGGCTCCTGGTGCTCG	KAGVTQTPRYLIKTRGQQVTLSCSPISGHRSVSWYQQTPGQGLQFLFEYFSETQRNKGNFPGRFSGRQFSNSRSEMNVSTLELGDSALYLCASSLPGQALPYQETQYFGPGTRLLVL	TRB	F	T	F	T	F	T	TRBV5-1*01	TRBD1*01	TRBJ2-5*01	AAGGCTGGAGTCACTCAAACTCCAAGATATCTGATCAAAACGAGAGGACAGCAAGTGACACTGAGCTGCTCCCCTATCTCTGGGCATAGGAGTGTATCCTGGTACCAACAGACCCCAGGACAGGGCCTTCAGTTCCTCTTTGAATACTTCAGTGAGACACAGAGAAACAAAGGAAACTTCCCTGGTCGATTCTCAGGGCGCCAGTTCTCTAACTCTCGCTCTGAGATGAATGTGAGCACCTTGGAGCTGGGGGACTCGGCCCTTTATCTTTGCGCCAGCAGCTTGCCGGGACAGGCCCTTCCGTACCAAGAGACCCAGTACTTCGGGCCAGGCACGCGGCTCCTGGTGCTCG	AAGGCTGGAGTCACTCAAACTCCAAGATATCTGATCAAAACGAGAGGACAGCAAGTGACACTGAGCTGCTCCCCTATCTCTGGGCATAGGAGTGTATCCTGGTACCAACAGACCCCAGGACAGGGCCTTCAGTTCCTCTTTGAATACTTCAGTGAGACACAGAGAAACAAAGGAAACTTCCCTGGTCGATTCTCAGGGCGCCAGTTCTCTAACTCTCGCTCTGAGATGAATGTGAGCACCTTGGAGCTGGGGGACTCGGCCCTTTATCTTTGCGCCAGCAGCTTGNNGGGACAGGNNNNNNNNNACCAAGAGACCCAGTACTTCGGGCCAGGCACGCGGCTCCTGGTGCTCG	KAGVTQTPRYLIKTRGQQVTLSCSPISGHRSVSWYQQTPGQGLQFLFEYFSETQRNKGNFPGRFSGRQFSNSRSEMNVSTLELGDSALYLCASSLPGQALPYQETQYFGPGTRLLVL	KAGVTQTPRYLIKTRGQQVTLSCSPISGHRSVSWYQQTPGQGLQFLFEYFSETQRNKGNFPGRFSGRQFSNSRSEMNVSTLELGDSALYLCASSLXGQXXXXQETQYFGPGTRLLVL	1	285	288	295	305	352	AAGGCTGGAGTCACTCAAACTCCAAGATATCTGATCAAAACGAGAGGACAGCAAGTGACACTGAGCTGCTCCCCTATCTCTGGGCATAGGAGTGTATCCTGGTACCAACAGACCCCAGGACAGGGCCTTCAGTTCCTCTTTGAATACTTCAGTGAGACACAGAGAAACAAAGGAAACTTCCCTGGTCGATTCTCAGGGCGCCAGTTCTCTAACTCTCGCTCTGAGATGAATGTGAGCACCTTGGAGCTGGGGGACTCGGCCCTTTATCTTTGCGCCAGCAGCTTG	KAGVTQTPRYLIKTRGQQVTLSCSPISGHRSVSWYQQTPGQGLQFLFEYFSETQRNKGNFPGRFSGRQFSNSRSEMNVSTLELGDSALYLCASSL	AAGGCTGGAGTCACTCAAACTCCAAGATATCTGATCAAAACGAGAGGACAGCAAGTGACACTGAGCTGCTCCCCTATCTCTGGGCATAGGAGTGTATCCTGGTACCAACAGACCCCAGGACAGGGCCTTCAGTTCCTCTTTGAATACTTCAGTGAGACACAGAGAAACAAAGGAAACTTCCCTGGTCGATTCTCAGGGCGCCAGTTCTCTAACTCTCGCTCTGAGATGAATGTGAGCACCTTGGAGCTGGGGGACTCGGCCCTTTATCTTTGCGCCAGCAGCTTG	KAGVTQTPRYLIKTRGQQVTLSCSPISGHRSVSWYQQTPGQGLQFLFEYFSETQRNKGNFPGRFSGRQFSNSRSEMNVSTLELGDSALYLCASSL	GGGACAGG	GQ	GGGACAGG	GQ	ACCAAGAGACCCAGTACTTCGGGCCAGGCACGCGGCTCCTGGTGCTCG	QETQYFGPGTRLLVL	ACCAAGAGACCCAGTACTTCGGGCCAGGCACGCGGCTCCTGGTGCTCG	QETQYFGPGTRLLVL	AAGGCTGGAGTCACTCAAACTCCAAGATATCTGATCAAAACGAGAGGACAGCAAGTGACACTGAGCTGCTCCCCTATC	KAGVTQTPRYLIKTRGQQVTLSCSPI	TCTGGGCATAGGAGT	SGHRS	GTATCCTGGTACCAACAGACCCCAGGACAGGGCCTTCAGTTCCTCTTTGAA	VSWYQQTPGQGLQFLFE	TACTTCAGTGAGACACAG	YFSETQ
Pat726	IW9	CTCGTACTCGTAGATC	TCRbeta	tig00000048_CTCGTACTCGTAGATC	1018	101	1	GACACTGAAGTTACCCAGACACCAAAACACCTGGTCATGGGAATGACAAATAAGAAGTCTTTGAAATGTGAACAACATATGGGGCACAGGGCTATGTATTGGTACAAGCAGAAAGCTAAGAAGCCACCGGAGCTCATGTTTGTCTACAGCTATGAGAAACTCTCTATAAATGAAAGTGTGCCAAGTCGCTTCTCACCTGAATGCCCCAACAGCTCTCTCTTAAACCTTCACCTACACGCCCTGCAGCCAGAAGACTCAGCCCTGTATCTCTGCGCCAGCAGCCAGACGGACAGGGGAACTAATGAAAAACTGTTTTTTGGCAGTGGAACCCAGCTCTCTGTCTTGG	DTEVTQTPKHLVMGMTNKKSLKCEQHMGHRAMYWYKQKAKKPPELMFVYSYEKLSINESVPSRFSPECPNSSLLNLHLHALQPEDSALYLCASSQTDRGTNEKLFFGSGTQLSVL	TRB	F	T	F	T	F	T	TRBV4-1*01	TRBD1*01	TRBJ1-4*01	GACACTGAAGTTACCCAGACACCAAAACACCTGGTCATGGGAATGACAAATAAGAAGTCTTTGAAATGTGAACAACATATGGGGCACAGGGCTATGTATTGGTACAAGCAGAAAGCTAAGAAGCCACCGGAGCTCATGTTTGTCTACAGCTATGAGAAACTCTCTATAAATGAAAGTGTGCCAAGTCGCTTCTCACCTGAATGCCCCAACAGCTCTCTCTTAAACCTTCACCTACACGCCCTGCAGCCAGAAGACTCAGCCCTGTATCTCTGCGCCAGCAGCCAGACGGACAGGGGAACTAATGAAAAACTGTTTTTTGGCAGTGGAACCCAGCTCTCTGTCTTGG	GACACTGAAGTTACCCAGACACCAAAACACCTGGTCATGGGAATGACAAATAAGAAGTCTTTGAAATGTGAACAACATATGGGGCACAGGGCTATGTATTGGTACAAGCAGAAAGCTAAGAAGCCACCGGAGCTCATGTTTGTCTACAGCTATGAGAAACTCTCTATAAATGAAAGTGTGCCAAGTCGCTTCTCACCTGAATGCCCCAACAGCTCTCTCTTAAACCTTCACCTACACGCCCTGCAGCCAGAAGACTCAGCCCTGTATCTCTGCGCCAGCAGCCANNNGGACAGGGGAACTAATGAAAAACTGTTTTTTGGCAGTGGAACCCAGCTCTCTGTCTTGG	DTEVTQTPKHLVMGMTNKKSLKCEQHMGHRAMYWYKQKAKKPPELMFVYSYEKLSINESVPSRFSPECPNSSLLNLHLHALQPEDSALYLCASSQTDRGTNEKLFFGSGTQLSVL	DTEVTQTPKHLVMGMTNKKSLKCEQHMGHRAMYWYKQKAKKPPELMFVYSYEKLSINESVPSRFSPECPNSSLLNLHLHALQPEDSALYLCASSXXDRGTNEKLFFGSGTQLSVL	1	284	288	296	297	346	GACACTGAAGTTACCCAGACACCAAAACACCTGGTCATGGGAATGACAAATAAGAAGTCTTTGAAATGTGAACAACATATGGGGCACAGGGCTATGTATTGGTACAAGCAGAAAGCTAAGAAGCCACCGGAGCTCATGTTTGTCTACAGCTATGAGAAACTCTCTATAAATGAAAGTGTGCCAAGTCGCTTCTCACCTGAATGCCCCAACAGCTCTCTCTTAAACCTTCACCTACACGCCCTGCAGCCAGAAGACTCAGCCCTGTATCTCTGCGCCAGCAGCCA	DTEVTQTPKHLVMGMTNKKSLKCEQHMGHRAMYWYKQKAKKPPELMFVYSYEKLSINESVPSRFSPECPNSSLLNLHLHALQPEDSALYLCASS	GACACTGAAGTTACCCAGACACCAAAACACCTGGTCATGGGAATGACAAATAAGAAGTCTTTGAAATGTGAACAACATATGGGGCACAGGGCTATGTATTGGTACAAGCAGAAAGCTAAGAAGCCACCGGAGCTCATGTTTGTCTACAGCTATGAGAAACTCTCTATAAATGAAAGTGTGCCAAGTCGCTTCTCACCTGAATGCCCCAACAGCTCTCTCTTAAACCTTCACCTACACGCCCTGCAGCCAGAAGACTCAGCCCTGTATCTCTGCGCCAGCAGCCA	DTEVTQTPKHLVMGMTNKKSLKCEQHMGHRAMYWYKQKAKKPPELMFVYSYEKLSINESVPSRFSPECPNSSLLNLHLHALQPEDSALYLCASS	GGACAGGGG	DRG	GGACAGGGG	DRG	AACTAATGAAAAACTGTTTTTTGGCAGTGGAACCCAGCTCTCTGTCTTGG	TNEKLFFGSGTQLSVL	AACTAATGAAAAACTGTTTTTTGGCAGTGGAACCCAGCTCTCTGTCTTGG	TNEKLFFGSGTQLSVL	GACACTGAAGTTACCCAGACACCAAAACACCTGGTCATGGGAATGACAAATAAGAAGTCTTTGAAATGTGAACAACAT	DTEVTQTPKHLVMGMTNKKSLKCEQH	ATGGGGCACAGGGCT	MGHRA	ATGTATTGGTACAAGCAGAAAGCTAAGAAGCCACCGGAGCTCATGTTTGTC	MYWYKQKAKKPPELMFV	TACAGCTATGAGAAACTC	YSYEKL
Pat726	KW11	CTCGTACTCTTGTCAT	TCRbeta	tig00000010_CTCGTACTCTTGTCAT	772	401	1	ACTGCTGGGATCACCCAGGCACCAACATCTCAGATCCTGGCAGCAGGACGGAGCATGACACTGAGATGTACCCAGGATATGAGACATAATGCCATGTACTGGTATAGACAAGATCTAGGACTGGGGCTAAGGCTCATCCATTATTCAAATACTGCAGGTACCACTGGCAAAGGAGAAGTCCCTGATGGTTATAGTGTCTCCAGAGCAAACACAGATGATTTCCCCCTCACGTTGGCGTCTGCTGTACCCTCTCAGACATCTGTGTACTTCTGTGCCAGCAGACGACTTGGGGGGCCCTACGAGCAGTACGTCGGGCCGGGCACCAGGCTCACGGTCACAG	AGITQAPTSQILAAGRSMTLRCTQDMRHNAMYWYRQDLGLGLRLIHYSNTAGTTGKGEVPDGYSVSRANTDDFPLTLASAVPSQTSVYFCASRRLGGPYEQYVGPGTRLTVT	TRB	F	T	F	T	F	T	TRBV6-4*02	TRBD1*01	TRBJ2-7*02	ACTGCTGGGATCACCCAGGCACCAACATCTCAGATCCTGGCAGCAGGACGGAGCATGACACTGAGATGTACCCAGGATATGAGACATAATGCCATGTACTGGTATAGACAAGATCTAGGACTGGGGCTAAGGCTCATCCATTATTCAAATACTGCAGGTACCACTGGCAAAGGAGAAGTCCCTGATGGTTATAGTGTCTCCAGAGCAAACACAGATGATTTCCCCCTCACGTTGGCGTCTGCTGTACCCTCTCAGACATCTGTGTACTTCTGTGCCAGCAGACGACTTGGGGGGCCCTACGAGCAGTACGTCGGGCCGGGCACCAGGCTCACGGTCACAG	ACTGCTGGGATCACCCAGGCACCAACATCTCAGATCCTGGCAGCAGGACGGAGCATGACACTGAGATGTACCCAGGATATGAGACATAATGCCATGTACTGGTATAGACAAGATCTAGGACTGGGGCTAAGGCTCATCCATTATTCAAATACTGCAGGTACCACTGGCAAAGGAGAAGTCCCTGATGGTTATAGTGTCTCCAGAGCAAACACAGATGATTTCCCCCTCACGTTGGCGTCTGCTGTACCCTCTCAGACATCTGTGTACTTCTGTGCCAGCAGNNNNNNNNGGGGGCCCTACGAGCAGTACGTCGGGCCGGGCACCAGGCTCACGGTCACAG	TAGITQAPTSQILAAGRSMTLRCTQDMRHNAMYWYRQDLGLGLRLIHYSNTAGTTGKGEVPDGYSVSRANTDDFPLTLASAVPSQTSVYFCASRRLGGPYEQYVGPGTRLTVT	TAGITQAPTSQILAAGRSMTLRCTQDMRHNAMYWYRQDLGLGLRLIHYSNTAGTTGKGEVPDGYSVSRANTDDFPLTLASAVPSQTSVYFCASXXXXGPYEQYVGPGTRLTVT	1	281	290	295	296	340	ACTGCTGGGATCACCCAGGCACCAACATCTCAGATCCTGGCAGCAGGACGGAGCATGACACTGAGATGTACCCAGGATATGAGACATAATGCCATGTACTGGTATAGACAAGATCTAGGACTGGGGCTAAGGCTCATCCATTATTCAAATACTGCAGGTACCACTGGCAAAGGAGAAGTCCCTGATGGTTATAGTGTCTCCAGAGCAAACACAGATGATTTCCCCCTCACGTTGGCGTCTGCTGTACCCTCTCAGACATCTGTGTACTTCTGTGCCAGCAG	TAGITQAPTSQILAAGRSMTLRCTQDMRHNAMYWYRQDLGLGLRLIHYSNTAGTTGKGEVPDGYSVSRANTDDFPLTLASAVPSQTSVYFCAS	ACTGCTGGGATCACCCAGGCACCAACATCTCAGATCCTGGCAGCAGGACGGAGCATGACACTGAGATGTACCCAGGATATGAGACATAATGCCATGTACTGGTATAGACAAGATCTAGGACTGGGGCTAAGGCTCATCCATTATTCAAATACTGCAGGTACCACTGGCAAAGGAGAAGTCCCTGATGGTTATAGTGTCTCCAGAGCAAACACAGATGATTTCCCCCTCACGTTGGCGTCTGCTGTACCCTCTCAGACATCTGTGTACTTCTGTGCCAGCAG	TAGITQAPTSQILAAGRSMTLRCTQDMRHNAMYWYRQDLGLGLRLIHYSNTAGTTGKGEVPDGYSVSRANTDDFPLTLASAVPSQTSVYFCAS	GGGGGC	G	GGGGGC	G	CCTACGAGCAGTACGTCGGGCCGGGCACCAGGCTCACGGTCACAG	YEQYVGPGTRLTVT	CCTACGAGCAGTACGTCGGGCCGGGCACCAGGCTCACGGTCACAG	YEQYVGPGTRLTVT	ACTGCTGGGATCACCCAGGCACCAACATCTCAGATCCTGGCAGCAGGACGGAGCATGACACTGAGATGTACCCAGGAT	TAGITQAPTSQILAAGRSMTLRCTQD	ATGAGACATAATGCC	MRHNA	ATGTACTGGTATAGACAAGATCTAGGACTGGGGCTAAGGCTCATCCATTAT	MYWYRQDLGLGLRLIHY	TCAAATACTGCAGGTACC	SNTAGT
Pat726	KW11	CTCTGGTAGCCAGTTT	TCRbeta	tig00000354_CTCTGGTAGCCAGTTT	554	347	1	GATACTGGAGTCTCCCAGGACCCCAGACACAAGATCACAAAGAGGGGACAGAATGTAACTTTCAGGTGTGATCCAATTTCTGAACACAACCGCCTTTATTGGTACCGACAGACCCTGGGGCAGGGCCCAGAGTTTCTGACTTACTTCCAGAATGAAGCTCAACTAGAAAAATCAAGGCTGCTCAGTGATCGGTTCTCTGCAGGGAGGCCTAAGGGATCTTTCTCCACCTTGGAGATCCAGCGCACAGAGCAGGGGGACTCGGCCATGTATCTCTGTGCCAGCAGCGTCAGACAGGGGGGCGATTCAGATACGCAGTATTTTGGCCCAGGCACCCGGCTGACAGTGCTCG	DTGVSQDPRHKITKRGQNVTFRCDPISEHNRLYWYRQTLGQGPEFLTYFQNEAQLEKSRLLSDRFSAGRPKGSFSTLEIQRTEQGDSAMYLCASSVRQGGDSDTQYFGPGTRLTVL	TRB	F	T	F	T	F	T	TRBV7-9*03	TRBD1*01	TRBJ2-3*01	GATACTGGAGTCTCCCAGGACCCCAGACACAAGATCACAAAGAGGGGACAGAATGTAACTTTCAGGTGTGATCCAATTTCTGAACACAACCGCCTTTATTGGTACCGACAGACCCTGGGGCAGGGCCCAGAGTTTCTGACTTACTTCCAGAATGAAGCTCAACTAGAAAAATCAAGGCTGCTCAGTGATCGGTTCTCTGCAGGGAGGCCTAAGGGATCTTTCTCCACCTTGGAGATCCAGCGCACAGAGCAGGGGGACTCGGCCATGTATCTCTGTGCCAGCAGCGTCAGACAGGGGGGCGATTCAGATACGCAGTATTTTGGCCCAGGCACCCGGCTGACAGTGCTCG	GATACTGGAGTCTCCCAGGACCCCAGACACAAGATCACAAAGAGGGGACAGAATGTAACTTTCAGGTGTGATCCAATTTCTGAACACAACCGCCTTTATTGGTACCGACAGACCCTGGGGCAGGGCCCAGAGTTTCTGACTTACTTCCAGAATGAAGCTCAACTAGAAAAATCAAGGCTGCTCAGTGATCGGTTCTCTGCAGAGAGGCCTAAGGGATCTTTCTCCACCTTGGAGATCCAGCGCACAGAGCAGGGGGACTCGGCCATGTATCTCTGTGCCAGCAGCNNNNGACAGGGGGNNNNNNCAGATACGCAGTATTTTGGCCCAGGCACCCGGCTGACAGTGCTCG	DTGVSQDPRHKITKRGQNVTFRCDPISEHNRLYWYRQTLGQGPEFLTYFQNEAQLEKSRLLSDRFSAGRPKGSFSTLEIQRTEQGDSAMYLCASSVRQGGDSDTQYFGPGTRLTVL	DTGVSQDPRHKITKRGQNVTFRCDPISEHNRLYWYRQTLGQGPEFLTYFQNEAQLEKSRLLSDRFSAERPKGSFSTLEIQRTEQGDSAMYLCASSXXQGXXXDTQYFGPGTRLTVL	1	285	290	298	305	349	GATACTGGAGTCTCCCAGGACCCCAGACACAAGATCACAAAGAGGGGACAGAATGTAACTTTCAGGTGTGATCCAATTTCTGAACACAACCGCCTTTATTGGTACCGACAGACCCTGGGGCAGGGCCCAGAGTTTCTGACTTACTTCCAGAATGAAGCTCAACTAGAAAAATCAAGGCTGCTCAGTGATCGGTTCTCTGCAGGGAGGCCTAAGGGATCTTTCTCCACCTTGGAGATCCAGCGCACAGAGCAGGGGGACTCGGCCATGTATCTCTGTGCCAGCAGC	DTGVSQDPRHKITKRGQNVTFRCDPISEHNRLYWYRQTLGQGPEFLTYFQNEAQLEKSRLLSDRFSAGRPKGSFSTLEIQRTEQGDSAMYLCASS	GATACTGGAGTCTCCCAGGACCCCAGACACAAGATCACAAAGAGGGGACAGAATGTAACTTTCAGGTGTGATCCAATTTCTGAACACAACCGCCTTTATTGGTACCGACAGACCCTGGGGCAGGGCCCAGAGTTTCTGACTTACTTCCAGAATGAAGCTCAACTAGAAAAATCAAGGCTGCTCAGTGATCGGTTCTCTGCAGAGAGGCCTAAGGGATCTTTCTCCACCTTGGAGATCCAGCGCACAGAGCAGGGGGACTCGGCCATGTATCTCTGTGCCAGCAGC	DTGVSQDPRHKITKRGQNVTFRCDPISEHNRLYWYRQTLGQGPEFLTYFQNEAQLEKSRLLSDRFSAERPKGSFSTLEIQRTEQGDSAMYLCASS	GACAGGGGG	QG	GACAGGGGG	QG	CAGATACGCAGTATTTTGGCCCAGGCACCCGGCTGACAGTGCTCG	DTQYFGPGTRLTVL	CAGATACGCAGTATTTTGGCCCAGGCACCCGGCTGACAGTGCTCG	DTQYFGPGTRLTVL	GATACTGGAGTCTCCCAGGACCCCAGACACAAGATCACAAAGAGGGGACAGAATGTAACTTTCAGGTGTGATCCAATT	DTGVSQDPRHKITKRGQNVTFRCDPI	TCTGAACACAACCGC	SEHNR	CTTTATTGGTACCGACAGACCCTGGGGCAGGGCCCAGAGTTTCTGACTTAC	LYWYRQTLGQGPEFLTY	TTCCAGAATGAAGCTCAA	FQNEAQ
Pat726	IW9	CTGATCCCAAACAACA	TCRbeta	tig00000009_CTGATCCCAAACAACA	1021	388	1	GAACCTGAAGTCACCCAGACTCCCAGCCATCAGGTCACACAGATGGGACAGGAAGTGATCTTGCGCTGTGTCCCCATCTCTAATCACTTATACTTCTATTGGTACAGACAAATCTTGGGGCAGAAAGTCGAGTTTCTGGTTTCCTTTTATAATAATGAAATCTCAGAGAAGTCTGAAATATTCGATGATCAATTCTCAGTTGAAAGGCCTGATGGATCAAATTTCACTCTGAAGATCCGGTCCACAAAGCTGGAGGACTCAGCCATGTACTTCTGTGCCAGCTCAAGAGGGCAGGACGAGCAGTACTTCGGGCCGGGCACCAGGCTCACGGTCACAG	EPEVTQTPSHQVTQMGQEVILRCVPISNHLYFYWYRQILGQKVEFLVSFYNNEISEKSEIFDDQFSVERPDGSNFTLKIRSTKLEDSAMYFCASSRGQDEQYFGPGTRLTVT	TRB	F	T	F	T	F	T	TRBV2*01	TRBD2*02	TRBJ2-7*01	GAACCTGAAGTCACCCAGACTCCCAGCCATCAGGTCACACAGATGGGACAGGAAGTGATCTTGCGCTGTGTCCCCATCTCTAATCACTTATACTTCTATTGGTACAGACAAATCTTGGGGCAGAAAGTCGAGTTTCTGGTTTCCTTTTATAATAATGAAATCTCAGAGAAGTCTGAAATATTCGATGATCAATTCTCAGTTGAAAGGCCTGATGGATCAAATTTCACTCTGAAGATCCGGTCCACAAAGCTGGAGGACTCAGCCATGTACTTCTGTGCCAGCTCAAGAGGGCAGGACGAGCAGTACTTCGGGCCGGGCACCAGGCTCACGGTCACAG	GAACCTGAAGTCACCCAGACTCCCAGCCATCAGGTCACACAGATGGGACAGGAAGTGATCTTGCGCTGTGTCCCCATCTCTAATCACTTATACTTCTATTGGTACAGACAAATCTTGGGGCAGAAAGTCGAGTTTCTGGTTTCCTTTTATAATAATGAAATCTCAGAGAAGTCTGAAATATTCGATGATCAATTCTCAGTTGAAAGGCCTGATGGATCAAATTTCACTCTGAAGATCCGGTCCACAAAGCTGGAGGACTCAGCCATGTACTTCTGTGCCAGCNNNNGAGGGNNNNACGAGCAGTACTTCGGGCCGGGCACCAGGCTCACGGTCACAG	EPEVTQTPSHQVTQMGQEVILRCVPISNHLYFYWYRQILGQKVEFLVSFYNNEISEKSEIFDDQFSVERPDGSNFTLKIRSTKLEDSAMYFCASSRGQDEQYFGPGTRLTVT	EPEVTQTPSHQVTQMGQEVILRCVPISNHLYFYWYRQILGQKVEFLVSFYNNEISEKSEIFDDQFSVERPDGSNFTLKIRSTKLEDSAMYFCASXXGXXEQYFGPGTRLTVT	1	282	287	291	296	337	GAACCTGAAGTCACCCAGACTCCCAGCCATCAGGTCACACAGATGGGACAGGAAGTGATCTTGCGCTGTGTCCCCATCTCTAATCACTTATACTTCTATTGGTACAGACAAATCTTGGGGCAGAAAGTCGAGTTTCTGGTTTCCTTTTATAATAATGAAATCTCAGAGAAGTCTGAAATATTCGATGATCAATTCTCAGTTGAAAGGCCTGATGGATCAAATTTCACTCTGAAGATCCGGTCCACAAAGCTGGAGGACTCAGCCATGTACTTCTGTGCCAGC	EPEVTQTPSHQVTQMGQEVILRCVPISNHLYFYWYRQILGQKVEFLVSFYNNEISEKSEIFDDQFSVERPDGSNFTLKIRSTKLEDSAMYFCAS	GAACCTGAAGTCACCCAGACTCCCAGCCATCAGGTCACACAGATGGGACAGGAAGTGATCTTGCGCTGTGTCCCCATCTCTAATCACTTATACTTCTATTGGTACAGACAAATCTTGGGGCAGAAAGTCGAGTTTCTGGTTTCCTTTTATAATAATGAAATCTCAGAGAAGTCTGAAATATTCGATGATCAATTCTCAGTTGAAAGGCCTGATGGATCAAATTTCACTCTGAAGATCCGGTCCACAAAGCTGGAGGACTCAGCCATGTACTTCTGTGCCAGC	EPEVTQTPSHQVTQMGQEVILRCVPISNHLYFYWYRQILGQKVEFLVSFYNNEISEKSEIFDDQFSVERPDGSNFTLKIRSTKLEDSAMYFCAS	GAGGG	G	GAGGG	G	ACGAGCAGTACTTCGGGCCGGGCACCAGGCTCACGGTCACAG	EQYFGPGTRLTVT	ACGAGCAGTACTTCGGGCCGGGCACCAGGCTCACGGTCACAG	EQYFGPGTRLTVT	GAACCTGAAGTCACCCAGACTCCCAGCCATCAGGTCACACAGATGGGACAGGAAGTGATCTTGCGCTGTGTCCCCATC	EPEVTQTPSHQVTQMGQEVILRCVPI	TCTAATCACTTATAC	SNHLY	TTCTATTGGTACAGACAAATCTTGGGGCAGAAAGTCGAGTTTCTGGTTTCC	FYWYRQILGQKVEFLVS	TTTTATAATAATGAAATC	FYNNEI
Pat726	KW11	CTGCGGAGTCTCACCT	TCRbeta	tig00000016_CTGCGGAGTCTCACCT	1185	81	1	GATACTGGAGTCTCCCAGGACCCCAGACACAAGATCACAAAGAGGGGACAGAATGTAACTTTCAGGTGTGATCCAATTTCTGAACACAACCGCCTTTATTGGTACCGACAGACCCTGGGGCAGGGCCCAGAGTTTCTGACTTACTTCCAGAATGAAGCTCAACTAGAAAAATCAAGGCTGCTCAGTGATCGGTTCTCTGCAGGGAGGCCTAAGGGATCTTTCTCCACCTTGGAGATCCAGCGCACAGAGCAGGGGGACTCGGCCATGTATCTCTGTGCCAGCAGCTTTAGCGGGGCGAACTACAATGAGCAGTTCTTCGGGCCAGGGACACGGCTCACCGTGCTAG	DTGVSQDPRHKITKRGQNVTFRCDPISEHNRLYWYRQTLGQGPEFLTYFQNEAQLEKSRLLSDRFSAGRPKGSFSTLEIQRTEQGDSAMYLCASSFSGANYNEQFFGPGTRLTVL	TRB	F	T	F	T	F	T	TRBV7-9*03	TRBD2*01	TRBJ2-1*01	GATACTGGAGTCTCCCAGGACCCCAGACACAAGATCACAAAGAGGGGACAGAATGTAACTTTCAGGTGTGATCCAATTTCTGAACACAACCGCCTTTATTGGTACCGACAGACCCTGGGGCAGGGCCCAGAGTTTCTGACTTACTTCCAGAATGAAGCTCAACTAGAAAAATCAAGGCTGCTCAGTGATCGGTTCTCTGCAGGGAGGCCTAAGGGATCTTTCTCCACCTTGGAGATCCAGCGCACAGAGCAGGGGGACTCGGCCATGTATCTCTGTGCCAGCAGCTTTAGCGGGGCGAACTACAATGAGCAGTTCTTCGGGCCAGGGACACGGCTCACCGTGCTAG	GATACTGGAGTCTCCCAGGACCCCAGACACAAGATCACAAAGAGGGGACAGAATGTAACTTTCAGGTGTGATCCAATTTCTGAACACAACCGCCTTTATTGGTACCGACAGACCCTGGGGCAGGGCCCAGAGTTTCTGACTTACTTCCAGAATGAAGCTCAACTAGAAAAATCAAGGCTGCTCAGTGATCGGTTCTCTGCAGAGAGGCCTAAGGGATCTTTCTCCACCTTGGAGATCCAGCGCACAGAGCAGGGGGACTCGGCCATGTATCTCTGTGCCAGCAGCTTTAGCGGGGNNNNCTACAATGAGCAGTTCTTCGGGCCAGGGACACGGCTCACCGTGCTAG	DTGVSQDPRHKITKRGQNVTFRCDPISEHNRLYWYRQTLGQGPEFLTYFQNEAQLEKSRLLSDRFSAGRPKGSFSTLEIQRTEQGDSAMYLCASSFSGANYNEQFFGPGTRLTVL	DTGVSQDPRHKITKRGQNVTFRCDPISEHNRLYWYRQTLGQGPEFLTYFQNEAQLEKSRLLSDRFSAERPKGSFSTLEIQRTEQGDSAMYLCASSFSGXXYNEQFFGPGTRLTVL	1	287	288	295	300	346	GATACTGGAGTCTCCCAGGACCCCAGACACAAGATCACAAAGAGGGGACAGAATGTAACTTTCAGGTGTGATCCAATTTCTGAACACAACCGCCTTTATTGGTACCGACAGACCCTGGGGCAGGGCCCAGAGTTTCTGACTTACTTCCAGAATGAAGCTCAACTAGAAAAATCAAGGCTGCTCAGTGATCGGTTCTCTGCAGGGAGGCCTAAGGGATCTTTCTCCACCTTGGAGATCCAGCGCACAGAGCAGGGGGACTCGGCCATGTATCTCTGTGCCAGCAGCTT	DTGVSQDPRHKITKRGQNVTFRCDPISEHNRLYWYRQTLGQGPEFLTYFQNEAQLEKSRLLSDRFSAGRPKGSFSTLEIQRTEQGDSAMYLCASS	GATACTGGAGTCTCCCAGGACCCCAGACACAAGATCACAAAGAGGGGACAGAATGTAACTTTCAGGTGTGATCCAATTTCTGAACACAACCGCCTTTATTGGTACCGACAGACCCTGGGGCAGGGCCCAGAGTTTCTGACTTACTTCCAGAATGAAGCTCAACTAGAAAAATCAAGGCTGCTCAGTGATCGGTTCTCTGCAGAGAGGCCTAAGGGATCTTTCTCCACCTTGGAGATCCAGCGCACAGAGCAGGGGGACTCGGCCATGTATCTCTGTGCCAGCAGCTT	DTGVSQDPRHKITKRGQNVTFRCDPISEHNRLYWYRQTLGQGPEFLTYFQNEAQLEKSRLLSDRFSAERPKGSFSTLEIQRTEQGDSAMYLCASS	TAGCGGGG	SG	TAGCGGGG	SG	CTACAATGAGCAGTTCTTCGGGCCAGGGACACGGCTCACCGTGCTAG	YNEQFFGPGTRLTVL	CTACAATGAGCAGTTCTTCGGGCCAGGGACACGGCTCACCGTGCTAG	YNEQFFGPGTRLTVL	GATACTGGAGTCTCCCAGGACCCCAGACACAAGATCACAAAGAGGGGACAGAATGTAACTTTCAGGTGTGATCCAATT	DTGVSQDPRHKITKRGQNVTFRCDPI	TCTGAACACAACCGC	SEHNR	CTTTATTGGTACCGACAGACCCTGGGGCAGGGCCCAGAGTTTCTGACTTAC	LYWYRQTLGQGPEFLTY	TTCCAGAATGAAGCTCAA	FQNEAQ
Pat726	KW11	GCAGTTACAGGATTGG	TCRbeta	tig00000420_GCAGTTACAGGATTGG	1160	105	1	GATTCTGGAGTCACACAAACCCCAAAGCACCTGATCACAGCAACTGGACAGCGAGTGACGCTGAGATGCTCCCCTAGGTCTGGAGACCTCTCTGTGTACTGGTACCAACAGAGCCTGGACCAGGGCCTCCAGTTCCTCATTCAGTATTATAATGGAGAAGAGAGAGCAAAAGGAAACATTCTTGAACGATTCTCCGCACAACAGTTCCCTGACTTGCACTCTGAACTAAACCTGAGCTCTCTGGAGCTGGGGGACTCAGCTTTGTATTTCTGTGCCAGCAGCGAGGGATCCTCTGGGGCCAACGTCCTGACTTTCGGGGCCGGCAGCAGGCTGACCGTGCTGG	DSGVTQTPKHLITATGQRVTLRCSPRSGDLSVYWYQQSLDQGLQFLIQYYNGEERAKGNILERFSAQQFPDLHSELNLSSLELGDSALYFCASSEGSSGANVLTFGAGSRLTVL	TRB	F	T	F	T	F	T	TRBV9*01		TRBJ2-6*01	GATTCTGGAGTCACACAAACCCCAAAGCACCTGATCACAGCAACTGGACAGCGAGTGACGCTGAGATGCTCCCCTAGGTCTGGAGACCTCTCTGTGTACTGGTACCAACAGAGCCTGGACCAGGGCCTCCAGTTCCTCATTCAGTATTATAATGGAGAAGAGAGAGCAAAAGGAAACATTCTTGAACGATTCTCCGCACAACAGTTCCCTGACTTGCACTCTGAACTAAACCTGAGCTCTCTGGAGCTGGGGGACTCAGCTTTGTATTTCTGTGCCAGCAGCGAGGGATCCTCTGGGGCCAACGTCCTGACTTTCGGGGCCGGCAGCAGGCTGACCGTGCTGG	GATTCTGGAGTCACACAAACCCCAAAGCACCTGATCACAGCAACTGGACAGCGAGTGACGCTGAGATGCTCCCCTAGGTCTGGAGACCTCTCTGTGTACTGGTACCAACAGAGCCTGGACCAGGGCCTCCAGTTCCTCATTCAGTATTATAATGGAGAAGAGAGAGCAAAAGGAAACATTCTTGAACGATTCTCCGCACAACAGTTCCCTGACTTGCACTCTGAACTAAACCTGAGCTCTCTGGAGCTGGGGGACTCAGCTTTGTATTTCTGTGCCAGCAGCGNNNNNNNCTCTGGGGCCAACGTCCTGACTTTCGGGGCCGGCAGCAGGCTGACCGTGCTGG	DSGVTQTPKHLITATGQRVTLRCSPRSGDLSVYWYQQSLDQGLQFLIQYYNGEERAKGNILERFSAQQFPDLHSELNLSSLELGDSALYFCASSEGSSGANVLTFGAGSRLTVL	DSGVTQTPKHLITATGQRVTLRCSPRSGDLSVYWYQQSLDQGLQFLIQYYNGEERAKGNILERFSAQQFPDLHSELNLSSLELGDSALYFCASSXXXSGANVLTFGAGSRLTVL	1	283			291	343	GATTCTGGAGTCACACAAACCCCAAAGCACCTGATCACAGCAACTGGACAGCGAGTGACGCTGAGATGCTCCCCTAGGTCTGGAGACCTCTCTGTGTACTGGTACCAACAGAGCCTGGACCAGGGCCTCCAGTTCCTCATTCAGTATTATAATGGAGAAGAGAGAGCAAAAGGAAACATTCTTGAACGATTCTCCGCACAACAGTTCCCTGACTTGCACTCTGAACTAAACCTGAGCTCTCTGGAGCTGGGGGACTCAGCTTTGTATTTCTGTGCCAGCAGCG	DSGVTQTPKHLITATGQRVTLRCSPRSGDLSVYWYQQSLDQGLQFLIQYYNGEERAKGNILERFSAQQFPDLHSELNLSSLELGDSALYFCASS	GATTCTGGAGTCACACAAACCCCAAAGCACCTGATCACAGCAACTGGACAGCGAGTGACGCTGAGATGCTCCCCTAGGTCTGGAGACCTCTCTGTGTACTGGTACCAACAGAGCCTGGACCAGGGCCTCCAGTTCCTCATTCAGTATTATAATGGAGAAGAGAGAGCAAAAGGAAACATTCTTGAACGATTCTCCGCACAACAGTTCCCTGACTTGCACTCTGAACTAAACCTGAGCTCTCTGGAGCTGGGGGACTCAGCTTTGTATTTCTGTGCCAGCAGCG	DSGVTQTPKHLITATGQRVTLRCSPRSGDLSVYWYQQSLDQGLQFLIQYYNGEERAKGNILERFSAQQFPDLHSELNLSSLELGDSALYFCASS					CTCTGGGGCCAACGTCCTGACTTTCGGGGCCGGCAGCAGGCTGACCGTGCTGG	SGANVLTFGAGSRLTVL	CTCTGGGGCCAACGTCCTGACTTTCGGGGCCGGCAGCAGGCTGACCGTGCTGG	SGANVLTFGAGSRLTVL	GATTCTGGAGTCACACAAACCCCAAAGCACCTGATCACAGCAACTGGACAGCGAGTGACGCTGAGATGCTCCCCTAGG	DSGVTQTPKHLITATGQRVTLRCSPR	TCTGGAGACCTCTCT	SGDLS	GTGTACTGGTACCAACAGAGCCTGGACCAGGGCCTCCAGTTCCTCATTCAG	VYWYQQSLDQGLQFLIQ	TATTATAATGGAGAAGAG	YYNGEE
Pat726	IW9	GCATACAAGCGTAGTG	TCRbeta	tig00000003_GCATACAAGCGTAGTG	1166	500	1	GATGCTGGAATCACCCAGAGCCCAAGATACAAGATCACAGAGACAGGAAGGCAGGTGACCTTGATGTGTCACCAGACTTGGAGCCACAGCTATATGTTCTGGTATCGACAAGACCTGGGACATGGGCTGAGGCTGATCTATTACTCAGCAGCTGCTGATATTACAGATAAAGGAGAAGTCCCCGATGGCTATGTTGTCTCCAGATCCAAGACAGAGAATTTCCCCCTCACTCTGGAGTCAGCTACCCGCTCCCAGACATCTGTGTATTTCTGCGCCAGCGGCGGGAATAGCGAGGGGGAGACCCAGTACTTCGGGCCAGGCACGCGGCTCCTGGTGCTCG	DAGITQSPRYKITETGRQVTLMCHQTWSHSYMFWYRQDLGHGLRLIYYSAAADITDKGEVPDGYVVSRSKTENFPLTLESATRSQTSVYFCASGGNSEGETQYFGPGTRLLVL	TRB	F	T	F	T	F	T	TRBV10-2*01	TRBD2*01	TRBJ2-5*01	GATGCTGGAATCACCCAGAGCCCAAGATACAAGATCACAGAGACAGGAAGGCAGGTGACCTTGATGTGTCACCAGACTTGGAGCCACAGCTATATGTTCTGGTATCGACAAGACCTGGGACATGGGCTGAGGCTGATCTATTACTCAGCAGCTGCTGATATTACAGATAAAGGAGAAGTCCCCGATGGCTATGTTGTCTCCAGATCCAAGACAGAGAATTTCCCCCTCACTCTGGAGTCAGCTACCCGCTCCCAGACATCTGTGTATTTCTGCGCCAGCGGCGGGAATAGCGAGGGGGAGACCCAGTACTTCGGGCCAGGCACGCGGCTCCTGGTGCTCG	GATGCTGGAATCACCCAGAGCCCAAGATACAAGATCACAGAGACAGGAAGGCAGGTGACCTTGATGTGTCACCAGACTTGGAGCCACAGCTATATGTTCTGGTATCGACAAGACCTGGGACATGGGCTGAGGCTGATCTATTACTCAGCAGCTGCTGATATTACAGATAAAGGAGAAGTCCCCGATGGCTATGTTGTCTCCAGATCCAAGACAGAGAATTTCCCCCTCACTCTGGAGTCAGCTACCCGCTCCCAGACATCTGTGTATTTCTGCGCCAGCNNNGGGACTAGCGGGGGGGAGACCCAGTACTTCGGGCCAGGCACGCGGCTCCTGGTGCTCG	DAGITQSPRYKITETGRQVTLMCHQTWSHSYMFWYRQDLGHGLRLIYYSAAADITDKGEVPDGYVVSRSKTENFPLTLESATRSQTSVYFCASGGNSEGETQYFGPGTRLLVL	DAGITQSPRYKITETGRQVTLMCHQTWSHSYMFWYRQDLGHGLRLIYYSAAADITDKGEVPDGYVVSRSKTENFPLTLESATRSQTSVYFCASXGTSGGETQYFGPGTRLLVL	1	279	283	297	298	340	GATGCTGGAATCACCCAGAGCCCAAGATACAAGATCACAGAGACAGGAAGGCAGGTGACCTTGATGTGTCACCAGACTTGGAGCCACAGCTATATGTTCTGGTATCGACAAGACCTGGGACATGGGCTGAGGCTGATCTATTACTCAGCAGCTGCTGATATTACAGATAAAGGAGAAGTCCCCGATGGCTATGTTGTCTCCAGATCCAAGACAGAGAATTTCCCCCTCACTCTGGAGTCAGCTACCCGCTCCCAGACATCTGTGTATTTCTGCGCCAGC	DAGITQSPRYKITETGRQVTLMCHQTWSHSYMFWYRQDLGHGLRLIYYSAAADITDKGEVPDGYVVSRSKTENFPLTLESATRSQTSVYFCAS	GATGCTGGAATCACCCAGAGCCCAAGATACAAGATCACAGAGACAGGAAGGCAGGTGACCTTGATGTGTCACCAGACTTGGAGCCACAGCTATATGTTCTGGTATCGACAAGACCTGGGACATGGGCTGAGGCTGATCTATTACTCAGCAGCTGCTGATATTACAGATAAAGGAGAAGTCCCCGATGGCTATGTTGTCTCCAGATCCAAGACAGAGAATTTCCCCCTCACTCTGGAGTCAGCTACCCGCTCCCAGACATCTGTGTATTTCTGCGCCAGC	DAGITQSPRYKITETGRQVTLMCHQTWSHSYMFWYRQDLGHGLRLIYYSAAADITDKGEVPDGYVVSRSKTENFPLTLESATRSQTSVYFCAS	GGGAATAGCGAGGGG	GNSEG	GGGACTAGCGGGGGG	GTSGG	GAGACCCAGTACTTCGGGCCAGGCACGCGGCTCCTGGTGCTCG	ETQYFGPGTRLLVL	GAGACCCAGTACTTCGGGCCAGGCACGCGGCTCCTGGTGCTCG	ETQYFGPGTRLLVL	GATGCTGGAATCACCCAGAGCCCAAGATACAAGATCACAGAGACAGGAAGGCAGGTGACCTTGATGTGTCACCAGACT	DAGITQSPRYKITETGRQVTLMCHQT	TGGAGCCACAGCTAT	WSHSY	ATGTTCTGGTATCGACAAGACCTGGGACATGGGCTGAGGCTGATCTATTAC	MFWYRQDLGHGLRLIYY	TCAGCAGCTGCTGATATT	SAAADI
Pat726	KW11	GCGAGAAAGGGTGTTG	TCRbeta	tig00000263_GCGAGAAAGGGTGTTG	1022	7	1	AGTGCTGTCATCTCTCAAAAGCCAAGCAGGGATATCTGTCAACGTGGAACCTCCCTGACGATCCAGTGTCAAGTCGATAGCCAAGTCACCATGATGTTCTGGTACCGTCAGCAACCTGGACAGAGCCTGACACTGATCGCAACTGCAAATCAGGGCTCTGAGGCCACATATGAGAGTGGATTTGTCATTGACAAGTTTCCCATCAGCCGCCCAAACCTAACATTCTCAACTCTGACTGTGAGCAACATGAGCCCTGAAGACAGCAGCATATATCTCTGCAGCGCCGCCGGCACAGGCCTCTCCTACGAGCAGTACTTCGGGCCGGGCACCAGGCTCACGGTCACAG	SAVISQKPSRDICQRGTSLTIQCQVDSQVTMMFWYRQQPGQSLTLIATANQGSEATYESGFVIDKFPISRPNLTFSTLTVSNMSPEDSSIYLCSAAGTGLSYEQYFGPGTRLTVT	TRB	F	T	F	T	F	T	TRBV29-1*01	TRBD1*01	TRBJ2-7*01	AGTGCTGTCATCTCTCAAAAGCCAAGCAGGGATATCTGTCAACGTGGAACCTCCCTGACGATCCAGTGTCAAGTCGATAGCCAAGTCACCATGATGTTCTGGTACCGTCAGCAACCTGGACAGAGCCTGACACTGATCGCAACTGCAAATCAGGGCTCTGAGGCCACATATGAGAGTGGATTTGTCATTGACAAGTTTCCCATCAGCCGCCCAAACCTAACATTCTCAACTCTGACTGTGAGCAACATGAGCCCTGAAGACAGCAGCATATATCTCTGCAGCGCCGCCGGCACAGGCCTCTCCTACGAGCAGTACTTCGGGCCGGGCACCAGGCTCACGGTCACAG	AGTGCTGTCATCTCTCAAAAGCCAAGCAGGGATATCTGTCAACGTGGAACCTCCCTGACGATCCAGTGTCAAGTCGATAGCCAAGTCACCATGATGTTCTGGTACCGTCAGCAACCTGGACAGAGCCTGACACTGATCGCAACTGCAAATCAGGGCTCTGAGGCCACATATGAGAGTGGATTTGTCATTGACAAGTTTCCCATCAGCCGCCCAAACCTAACATTCTCAACTCTGACTGTGAGCAACATGAGCCCTGAAGACAGCAGCATATATCTCTGCAGCGNNNNNNNNACAGGNNNCTCCTACGAGCAGTACTTCGGGCCGGGCACCAGGCTCACGGTCACAG	SAVISQKPSRDICQRGTSLTIQCQVDSQVTMMFWYRQQPGQSLTLIATANQGSEATYESGFVIDKFPISRPNLTFSTLTVSNMSPEDSSIYLCSAAGTGLSYEQYFGPGTRLTVT	SAVISQKPSRDICQRGTSLTIQCQVDSQVTMMFWYRQQPGQSLTLIATANQGSEATYESGFVIDKFPISRPNLTFSTLTVSNMSPEDSSIYLCSXXXTGXSYEQYFGPGTRLTVT	1	283	292	296	300	346	AGTGCTGTCATCTCTCAAAAGCCAAGCAGGGATATCTGTCAACGTGGAACCTCCCTGACGATCCAGTGTCAAGTCGATAGCCAAGTCACCATGATGTTCTGGTACCGTCAGCAACCTGGACAGAGCCTGACACTGATCGCAACTGCAAATCAGGGCTCTGAGGCCACATATGAGAGTGGATTTGTCATTGACAAGTTTCCCATCAGCCGCCCAAACCTAACATTCTCAACTCTGACTGTGAGCAACATGAGCCCTGAAGACAGCAGCATATATCTCTGCAGCG	SAVISQKPSRDICQRGTSLTIQCQVDSQVTMMFWYRQQPGQSLTLIATANQGSEATYESGFVIDKFPISRPNLTFSTLTVSNMSPEDSSIYLCS	AGTGCTGTCATCTCTCAAAAGCCAAGCAGGGATATCTGTCAACGTGGAACCTCCCTGACGATCCAGTGTCAAGTCGATAGCCAAGTCACCATGATGTTCTGGTACCGTCAGCAACCTGGACAGAGCCTGACACTGATCGCAACTGCAAATCAGGGCTCTGAGGCCACATATGAGAGTGGATTTGTCATTGACAAGTTTCCCATCAGCCGCCCAAACCTAACATTCTCAACTCTGACTGTGAGCAACATGAGCCCTGAAGACAGCAGCATATATCTCTGCAGCG	SAVISQKPSRDICQRGTSLTIQCQVDSQVTMMFWYRQQPGQSLTLIATANQGSEATYESGFVIDKFPISRPNLTFSTLTVSNMSPEDSSIYLCS	ACAGG	TG	ACAGG	TG	CTCCTACGAGCAGTACTTCGGGCCGGGCACCAGGCTCACGGTCACAG	SYEQYFGPGTRLTVT	CTCCTACGAGCAGTACTTCGGGCCGGGCACCAGGCTCACGGTCACAG	SYEQYFGPGTRLTVT	AGTGCTGTCATCTCTCAAAAGCCAAGCAGGGATATCTGTCAACGTGGAACCTCCCTGACGATCCAGTGTCAAGTCGAT	SAVISQKPSRDICQRGTSLTIQCQVD	AGCCAAGTCACCATG	SQVTM	ATGTTCTGGTACCGTCAGCAACCTGGACAGAGCCTGACACTGATCGCAACT	MFWYRQQPGQSLTLIAT	GCAAATCAGGGCTCTGAGGCC	ANQGSEA
Pat726	KW11	GCGAGAAGTCTAGTGT	TCRbeta	tig00000022_GCGAGAAGTCTAGTGT	817	478	1	GATACTGGAGTCTCCCAGGACCCCAGACACAAGATCACAAAGAGGGGACAGAATGTAACTTTCAGGTGTGATCCAATTTCTGAACACAACCGCCTTTATTGGTACCGACAGACCCTGGGGCAGGGCCCAGAGTTTCTGACTTACTTCCAGAATGAAGCTCAACTAGAAAAATCAAGGCTGCTCAGTGATCGGTTCTCTGCAGAGAGGCCTAAGGGATCTTTCTCCACCTTGGAGATCCAGCGCACAGAGCAGGGGGACTCGGCCATGTATCTCTGTGCCAGCAGCTCGGGCAGCACTGAAGCTTTCTTTGGACAAGGCACCAGACTCACAGTTGTAG	DTGVSQDPRHKITKRGQNVTFRCDPISEHNRLYWYRQTLGQGPEFLTYFQNEAQLEKSRLLSDRFSAERPKGSFSTLEIQRTEQGDSAMYLCASSSGSTEAFFGQGTRLTVV	TRB	F	T	F	T	F	T	TRBV7-9*03		TRBJ1-1*01	GATACTGGAGTCTCCCAGGACCCCAGACACAAGATCACAAAGAGGGGACAGAATGTAACTTTCAGGTGTGATCCAATTTCTGAACACAACCGCCTTTATTGGTACCGACAGACCCTGGGGCAGGGCCCAGAGTTTCTGACTTACTTCCAGAATGAAGCTCAACTAGAAAAATCAAGGCTGCTCAGTGATCGGTTCTCTGCAGAGAGGCCTAAGGGATCTTTCTCCACCTTGGAGATCCAGCGCACAGAGCAGGGGGACTCGGCCATGTATCTCTGTGCCAGCAGCTCGGGCAGCACTGAAGCTTTCTTTGGACAAGGCACCAGACTCACAGTTGTAG	GATACTGGAGTCTCCCAGGACCCCAGACACAAGATCACAAAGAGGGGACAGAATGTAACTTTCAGGTGTGATCCAATTTCTGAACACAACCGCCTTTATTGGTACCGACAGACCCTGGGGCAGGGCCCAGAGTTTCTGACTTACTTCCAGAATGAAGCTCAACTAGAAAAATCAAGGCTGCTCAGTGATCGGTTCTCTGCAGAGAGGCCTAAGGGATCTTTCTCCACCTTGGAGATCCAGCGCACAGAGCAGGGGGACTCGGCCATGTATCTCTGTGCCAGCAGCTNNNNNNNCACTGAAGCTTTCTTTGGACAAGGCACCAGACTCACAGTTGTAG	DTGVSQDPRHKITKRGQNVTFRCDPISEHNRLYWYRQTLGQGPEFLTYFQNEAQLEKSRLLSDRFSAERPKGSFSTLEIQRTEQGDSAMYLCASSSGSTEAFFGQGTRLTVV	DTGVSQDPRHKITKRGQNVTFRCDPISEHNRLYWYRQTLGQGPEFLTYFQNEAQLEKSRLLSDRFSAERPKGSFSTLEIQRTEQGDSAMYLCASSXXXTEAFFGQGTRLTVV	1	286			294	337	GATACTGGAGTCTCCCAGGACCCCAGACACAAGATCACAAAGAGGGGACAGAATGTAACTTTCAGGTGTGATCCAATTTCTGAACACAACCGCCTTTATTGGTACCGACAGACCCTGGGGCAGGGCCCAGAGTTTCTGACTTACTTCCAGAATGAAGCTCAACTAGAAAAATCAAGGCTGCTCAGTGATCGGTTCTCTGCAGAGAGGCCTAAGGGATCTTTCTCCACCTTGGAGATCCAGCGCACAGAGCAGGGGGACTCGGCCATGTATCTCTGTGCCAGCAGCT	DTGVSQDPRHKITKRGQNVTFRCDPISEHNRLYWYRQTLGQGPEFLTYFQNEAQLEKSRLLSDRFSAERPKGSFSTLEIQRTEQGDSAMYLCASS	GATACTGGAGTCTCCCAGGACCCCAGACACAAGATCACAAAGAGGGGACAGAATGTAACTTTCAGGTGTGATCCAATTTCTGAACACAACCGCCTTTATTGGTACCGACAGACCCTGGGGCAGGGCCCAGAGTTTCTGACTTACTTCCAGAATGAAGCTCAACTAGAAAAATCAAGGCTGCTCAGTGATCGGTTCTCTGCAGAGAGGCCTAAGGGATCTTTCTCCACCTTGGAGATCCAGCGCACAGAGCAGGGGGACTCGGCCATGTATCTCTGTGCCAGCAGCT	DTGVSQDPRHKITKRGQNVTFRCDPISEHNRLYWYRQTLGQGPEFLTYFQNEAQLEKSRLLSDRFSAERPKGSFSTLEIQRTEQGDSAMYLCASS					CACTGAAGCTTTCTTTGGACAAGGCACCAGACTCACAGTTGTAG	TEAFFGQGTRLTVV	CACTGAAGCTTTCTTTGGACAAGGCACCAGACTCACAGTTGTAG	TEAFFGQGTRLTVV	GATACTGGAGTCTCCCAGGACCCCAGACACAAGATCACAAAGAGGGGACAGAATGTAACTTTCAGGTGTGATCCAATT	DTGVSQDPRHKITKRGQNVTFRCDPI	TCTGAACACAACCGC	SEHNR	CTTTATTGGTACCGACAGACCCTGGGGCAGGGCCCAGAGTTTCTGACTTAC	LYWYRQTLGQGPEFLTY	TTCCAGAATGAAGCTCAA	FQNEAQ
Pat726	KW11	GCTGCGATCATACGGT	TCRbeta	tig00000003_GCTGCGATCATACGGT	896	220	1	GAAACGGGAGTTACGCAGACACCAAGACACCTGGTCATGGGAATGACAAATAAGAAGTCTTTGAAATGTGAACAACATCTGGGGCATAACGCTATGTATTGGTACAAGCAAAGTGCTAAGAAGCCACTGGAGCTCATGTTTGTCTACAACTTTAAAGAACAGACTGAAAACAACAGTGTGCCAAGTCGCTTCTCACCTGAATGCCCCAACAGCTCTCACTTATTCCTTCACCTACACACCCTGCAGCCAGAAGACTCGGCCCTGTATCTCTGTGCCAGCAGCCAAGATCCCAAAGGGCCTACAGAGCAGTACTTCGGGCCGGGCACCAGGCTCACGGTCACAG	ETGVTQTPRHLVMGMTNKKSLKCEQHLGHNAMYWYKQSAKKPLELMFVYNFKEQTENNSVPSRFSPECPNSSHLFLHLHTLQPEDSALYLCASSQDPKGPTEQYFGPGTRLTVT	TRB	F	T	F	T	F	T	TRBV4-2*01		TRBJ2-7*01	GAAACGGGAGTTACGCAGACACCAAGACACCTGGTCATGGGAATGACAAATAAGAAGTCTTTGAAATGTGAACAACATCTGGGGCATAACGCTATGTATTGGTACAAGCAAAGTGCTAAGAAGCCACTGGAGCTCATGTTTGTCTACAACTTTAAAGAACAGACTGAAAACAACAGTGTGCCAAGTCGCTTCTCACCTGAATGCCCCAACAGCTCTCACTTATTCCTTCACCTACACACCCTGCAGCCAGAAGACTCGGCCCTGTATCTCTGTGCCAGCAGCCAAGATCCCAAAGGGCCTACAGAGCAGTACTTCGGGCCGGGCACCAGGCTCACGGTCACAG	GAAACGGGAGTTACGCAGACACCAAGACACCTGGTCATGGGAATGACAAATAAGAAGTCTTTGAAATGTGAACAACATCTGGGGCATAACGCTATGTATTGGTACAAGCAAAGTGCTAAGAAGCCACTGGAGCTCATGTTTGTCTACAACTTTAAAGAACAGACTGAAAACAACAGTGTGCCAAGTCGCTTCTCACCTGAATGCCCCAACAGCTCTCACTTATTCCTTCACCTACACACCCTGCAGCCAGAAGACTCGGCCCTGTATCTCTGTGCCAGCAGCCAAGANNNNNNNNNNNNNNNNGAGCAGTACTTCGGGCCGGGCACCAGGCTCACGGTCACAG	ETGVTQTPRHLVMGMTNKKSLKCEQHLGHNAMYWYKQSAKKPLELMFVYNFKEQTENNSVPSRFSPECPNSSHLFLHLHTLQPEDSALYLCASSQDPKGPTEQYFGPGTRLTVT	ETGVTQTPRHLVMGMTNKKSLKCEQHLGHNAMYWYKQSAKKPLELMFVYNFKEQTENNSVPSRFSPECPNSSHLFLHLHTLQPEDSALYLCASSQXXXXXXEQYFGPGTRLTVT	1	287			304	343	GAAACGGGAGTTACGCAGACACCAAGACACCTGGTCATGGGAATGACAAATAAGAAGTCTTTGAAATGTGAACAACATCTGGGGCATAACGCTATGTATTGGTACAAGCAAAGTGCTAAGAAGCCACTGGAGCTCATGTTTGTCTACAACTTTAAAGAACAGACTGAAAACAACAGTGTGCCAAGTCGCTTCTCACCTGAATGCCCCAACAGCTCTCACTTATTCCTTCACCTACACACCCTGCAGCCAGAAGACTCGGCCCTGTATCTCTGTGCCAGCAGCCAAGA	ETGVTQTPRHLVMGMTNKKSLKCEQHLGHNAMYWYKQSAKKPLELMFVYNFKEQTENNSVPSRFSPECPNSSHLFLHLHTLQPEDSALYLCASSQ	GAAACGGGAGTTACGCAGACACCAAGACACCTGGTCATGGGAATGACAAATAAGAAGTCTTTGAAATGTGAACAACATCTGGGGCATAACGCTATGTATTGGTACAAGCAAAGTGCTAAGAAGCCACTGGAGCTCATGTTTGTCTACAACTTTAAAGAACAGACTGAAAACAACAGTGTGCCAAGTCGCTTCTCACCTGAATGCCCCAACAGCTCTCACTTATTCCTTCACCTACACACCCTGCAGCCAGAAGACTCGGCCCTGTATCTCTGTGCCAGCAGCCAAGA	ETGVTQTPRHLVMGMTNKKSLKCEQHLGHNAMYWYKQSAKKPLELMFVYNFKEQTENNSVPSRFSPECPNSSHLFLHLHTLQPEDSALYLCASSQ					GAGCAGTACTTCGGGCCGGGCACCAGGCTCACGGTCACAG	EQYFGPGTRLTVT	GAGCAGTACTTCGGGCCGGGCACCAGGCTCACGGTCACAG	EQYFGPGTRLTVT	GAAACGGGAGTTACGCAGACACCAAGACACCTGGTCATGGGAATGACAAATAAGAAGTCTTTGAAATGTGAACAACAT	ETGVTQTPRHLVMGMTNKKSLKCEQH	CTGGGGCATAACGCT	LGHNA	ATGTATTGGTACAAGCAAAGTGCTAAGAAGCCACTGGAGCTCATGTTTGTC	MYWYKQSAKKPLELMFV	TACAACTTTAAAGAACAG	YNFKEQ
Pat726	KW11	GCTGCTTCATGGTAGG	TCRbeta	tig00000014_GCTGCTTCATGGTAGG	836	131	1	AATGCTGGTGTCACTCAGACCCCAAAATTCCGCATCCTGAAGATAGGACAGAGCATGACACTGCAGTGTACCCAGGATATGAACCATAACTACATGTACTGGTATCGACAAGACCCAGGCATGGGGCTGAAGCTGATTTATTATTCAGTTGGTGCTGGTATCACTGATAAAGGAGAAGTCCCGAATGGCTACAACGTCTCCAGATCAACCACAGAGGATTTCCCGCTCAGGCTGGAGTTGGCTGCTCCCTCCCAGACATCTGTGTACTTCTGTGCCAGCAGTTACTCGGGGAAGTGGTTCTTTGGACAAGGCACCAGACTCACAGTTGTAG	NAGVTQTPKFRILKIGQSMTLQCTQDMNHNYMYWYRQDPGMGLKLIYYSVGAGITDKGEVPNGYNVSRSTTEDFPLRLELAAPSQTSVYFCASSYSGKWFFGQGTRLTVV	TRB	F	T	F	T	F	T	TRBV6-6*01		TRBJ1-1*01	AATGCTGGTGTCACTCAGACCCCAAAATTCCGCATCCTGAAGATAGGACAGAGCATGACACTGCAGTGTACCCAGGATATGAACCATAACTACATGTACTGGTATCGACAAGACCCAGGCATGGGGCTGAAGCTGATTTATTATTCAGTTGGTGCTGGTATCACTGATAAAGGAGAAGTCCCGAATGGCTACAACGTCTCCAGATCAACCACAGAGGATTTCCCGCTCAGGCTGGAGTTGGCTGCTCCCTCCCAGACATCTGTGTACTTCTGTGCCAGCAGTTACTCGGGGAAGTGGTTCTTTGGACAAGGCACCAGACTCACAGTTGTAG	AATGCTGGTGTCACTCAGACCCCAAAATTCCGCATCCTGAAGATAGGACAGAGCATGACACTGCAGTGTACCCAGGATATGAACCATAACTACATGTACTGGTATCGACAAGACCCAGGCATGGGGCTGAAGCTGATTTATTATTCAGTTGGTGCTGGTATCACTGATAAAGGAGAAGTCCCGAATGGCTACAACGTCTCCAGATCAACCACAGAGGATTTCCCGCTCAGGCTGGAGTTGGCTGCTCCCTCCCAGACATCTGTGTACTTCTGTGCCAGCAGTTACTCNNNNNNNNNNTTCTTTGGACAAGGCACCAGACTCACAGTTGTAG	NAGVTQTPKFRILKIGQSMTLQCTQDMNHNYMYWYRQDPGMGLKLIYYSVGAGITDKGEVPNGYNVSRSTTEDFPLRLELAAPSQTSVYFCASSYSGKWFFGQGTRLTVV	NAGVTQTPKFRILKIGQSMTLQCTQDMNHNYMYWYRQDPGMGLKLIYYSVGAGITDKGEVPNGYNVSRSTTEDFPLRLELAAPSQTSVYFCASSYSXXXFFGQGTRLTVV	1	287			298	331	AATGCTGGTGTCACTCAGACCCCAAAATTCCGCATCCTGAAGATAGGACAGAGCATGACACTGCAGTGTACCCAGGATATGAACCATAACTACATGTACTGGTATCGACAAGACCCAGGCATGGGGCTGAAGCTGATTTATTATTCAGTTGGTGCTGGTATCACTGATAAAGGAGAAGTCCCGAATGGCTACAACGTCTCCAGATCAACCACAGAGGATTTCCCGCTCAGGCTGGAGTTGGCTGCTCCCTCCCAGACATCTGTGTACTTCTGTGCCAGCAGTTACTC	NAGVTQTPKFRILKIGQSMTLQCTQDMNHNYMYWYRQDPGMGLKLIYYSVGAGITDKGEVPNGYNVSRSTTEDFPLRLELAAPSQTSVYFCASSYS	AATGCTGGTGTCACTCAGACCCCAAAATTCCGCATCCTGAAGATAGGACAGAGCATGACACTGCAGTGTACCCAGGATATGAACCATAACTACATGTACTGGTATCGACAAGACCCAGGCATGGGGCTGAAGCTGATTTATTATTCAGTTGGTGCTGGTATCACTGATAAAGGAGAAGTCCCGAATGGCTACAACGTCTCCAGATCAACCACAGAGGATTTCCCGCTCAGGCTGGAGTTGGCTGCTCCCTCCCAGACATCTGTGTACTTCTGTGCCAGCAGTTACTC	NAGVTQTPKFRILKIGQSMTLQCTQDMNHNYMYWYRQDPGMGLKLIYYSVGAGITDKGEVPNGYNVSRSTTEDFPLRLELAAPSQTSVYFCASSYS					TTCTTTGGACAAGGCACCAGACTCACAGTTGTAG	FFGQGTRLTVV	TTCTTTGGACAAGGCACCAGACTCACAGTTGTAG	FFGQGTRLTVV	AATGCTGGTGTCACTCAGACCCCAAAATTCCGCATCCTGAAGATAGGACAGAGCATGACACTGCAGTGTACCCAGGAT	NAGVTQTPKFRILKIGQSMTLQCTQD	ATGAACCATAACTAC	MNHNY	ATGTACTGGTATCGACAAGACCCAGGCATGGGGCTGAAGCTGATTTATTAT	MYWYRQDPGMGLKLIYY	TCAGTTGGTGCTGGTATC	SVGAGI
Pat726	IW9	GCTGCTTGTCACCCAG	TCRbeta	tig00000001_GCTGCTTGTCACCCAG	914	462	1	GACACTGAAGTTACCCAGACACCAAAACACCTGGTCATGGGAATGACAAATAAGAAGTCTTTGAAATGTGAACAACATATGGGGCACAGGGCTATGTATTGGTACAAGCAGAAAGCTAAGAAGCCACCGGAGCTCATGTTTGTCTACAGCTATGAGAAACTCTCTATAAATGAAAGTGTGCCAAGTCGCTTCTCACCTGAATGCCCCAACAGCTCTCTCTTAAACCTTCACCTACACGCCCTGCAGCCAGAAGACTCAGCCGTGTATCTCTGTGCCAGCAGCTCGGACTCTAGCTCCTACAATGAGCAGTTCTTCGGGCCAGGGACACGGCTCACCGTGCTAG	DTEVTQTPKHLVMGMTNKKSLKCEQHMGHRAMYWYKQKAKKPPELMFVYSYEKLSINESVPSRFSPECPNSSLLNLHLHALQPEDSAVYLCASSSDSSSYNEQFFGPGTRLTVL	TRB	F	T	F	T	F	T	TRBV4-1*01	TRBD2*01	TRBJ2-1*01	GACACTGAAGTTACCCAGACACCAAAACACCTGGTCATGGGAATGACAAATAAGAAGTCTTTGAAATGTGAACAACATATGGGGCACAGGGCTATGTATTGGTACAAGCAGAAAGCTAAGAAGCCACCGGAGCTCATGTTTGTCTACAGCTATGAGAAACTCTCTATAAATGAAAGTGTGCCAAGTCGCTTCTCACCTGAATGCCCCAACAGCTCTCTCTTAAACCTTCACCTACACGCCCTGCAGCCAGAAGACTCAGCCGTGTATCTCTGTGCCAGCAGCTCGGACTCTAGCTCCTACAATGAGCAGTTCTTCGGGCCAGGGACACGGCTCACCGTGCTAG	GACACTGAAGTTACCCAGACACCAAAACACCTGGTCATGGGAATGACAAATAAGAAGTCTTTGAAATGTGAACAACATATGGGGCACAGGGCTATGTATTGGTACAAGCAGAAAGCTAAGAAGCCACCGGAGCTCATGTTTGTCTACAGCTATGAGAAACTCTCTATAAATGAAAGTGTGCCAAGTCGCTTCTCACCTGAATGCCCCAACAGCTCTCTCTTAAACCTTCACCTACACGCCCTGCAGCCAGAAGACTCAGCCCTGTATCTCTGCGCCAGCAGCNNGGACTNNNNCTCCTACAATGAGCAGTTCTTCGGGCCAGGGACACGGCTCACCGTGCTAG	DTEVTQTPKHLVMGMTNKKSLKCEQHMGHRAMYWYKQKAKKPPELMFVYSYEKLSINESVPSRFSPECPNSSLLNLHLHALQPEDSAVYLCASSSDSSSYNEQFFGPGTRLTVL	DTEVTQTPKHLVMGMTNKKSLKCEQHMGHRAMYWYKQKAKKPPELMFVYSYEKLSINESVPSRFSPECPNSSLLNLHLHALQPEDSALYLCASSXDXXSYNEQFFGPGTRLTVL	1	282	285	289	294	343	GACACTGAAGTTACCCAGACACCAAAACACCTGGTCATGGGAATGACAAATAAGAAGTCTTTGAAATGTGAACAACATATGGGGCACAGGGCTATGTATTGGTACAAGCAGAAAGCTAAGAAGCCACCGGAGCTCATGTTTGTCTACAGCTATGAGAAACTCTCTATAAATGAAAGTGTGCCAAGTCGCTTCTCACCTGAATGCCCCAACAGCTCTCTCTTAAACCTTCACCTACACGCCCTGCAGCCAGAAGACTCAGCCGTGTATCTCTGTGCCAGCAGC	DTEVTQTPKHLVMGMTNKKSLKCEQHMGHRAMYWYKQKAKKPPELMFVYSYEKLSINESVPSRFSPECPNSSLLNLHLHALQPEDSAVYLCASS	GACACTGAAGTTACCCAGACACCAAAACACCTGGTCATGGGAATGACAAATAAGAAGTCTTTGAAATGTGAACAACATATGGGGCACAGGGCTATGTATTGGTACAAGCAGAAAGCTAAGAAGCCACCGGAGCTCATGTTTGTCTACAGCTATGAGAAACTCTCTATAAATGAAAGTGTGCCAAGTCGCTTCTCACCTGAATGCCCCAACAGCTCTCTCTTAAACCTTCACCTACACGCCCTGCAGCCAGAAGACTCAGCCCTGTATCTCTGCGCCAGCAGC	DTEVTQTPKHLVMGMTNKKSLKCEQHMGHRAMYWYKQKAKKPPELMFVYSYEKLSINESVPSRFSPECPNSSLLNLHLHALQPEDSALYLCASS	GGACT	D	GGACT	D	CTCCTACAATGAGCAGTTCTTCGGGCCAGGGACACGGCTCACCGTGCTAG	SYNEQFFGPGTRLTVL	CTCCTACAATGAGCAGTTCTTCGGGCCAGGGACACGGCTCACCGTGCTAG	SYNEQFFGPGTRLTVL	GACACTGAAGTTACCCAGACACCAAAACACCTGGTCATGGGAATGACAAATAAGAAGTCTTTGAAATGTGAACAACAT	DTEVTQTPKHLVMGMTNKKSLKCEQH	ATGGGGCACAGGGCT	MGHRA	ATGTATTGGTACAAGCAGAAAGCTAAGAAGCCACCGGAGCTCATGTTTGTC	MYWYKQKAKKPPELMFV	TACAGCTATGAGAAACTC	YSYEKL
Pat726	IW9	GGAAAGCAGCTGCGAA	TCRbeta	tig00000001_GGAAAGCAGCTGCGAA	833	501	1	AATGCTGGTGTCACTCAGACCCCAAAATTCCGCATCCTGAAGATAGGACAGAGCATGACACTGCAGTGTACCCAGGATATGAACCATAACTACATGTACTGGTATCGACAAGACCCAGGCATGGGGCTGAAGCTGATTTATTATTCAGTTGGTGCTGGTATCACTGATAAAGGAGAAGTCCCGAATGGCTACAACGTCTCCAGATCAACCACAGAGGATTTCCCGCTCAGGCTGGAGTTGGCTGCTCCCTCCCAGACATCTGTGTACTTCTGTGCCAGCAGTTACCGGCCAGATACGCAGTATTTTGGCCCAGGCACCCGGCTGACAGTGCTCG	NAGVTQTPKFRILKIGQSMTLQCTQDMNHNYMYWYRQDPGMGLKLIYYSVGAGITDKGEVPNGYNVSRSTTEDFPLRLELAAPSQTSVYFCASSYRPDTQYFGPGTRLTVL	TRB	F	T	F	T	F	T	TRBV6-6*01		TRBJ2-3*01	AATGCTGGTGTCACTCAGACCCCAAAATTCCGCATCCTGAAGATAGGACAGAGCATGACACTGCAGTGTACCCAGGATATGAACCATAACTACATGTACTGGTATCGACAAGACCCAGGCATGGGGCTGAAGCTGATTTATTATTCAGTTGGTGCTGGTATCACTGATAAAGGAGAAGTCCCGAATGGCTACAACGTCTCCAGATCAACCACAGAGGATTTCCCGCTCAGGCTGGAGTTGGCTGCTCCCTCCCAGACATCTGTGTACTTCTGTGCCAGCAGTTACCGGCCAGATACGCAGTATTTTGGCCCAGGCACCCGGCTGACAGTGCTCG	AATGCTGGTGTCACTCAGACCCCAAAATTCCGCATCCTGAAGATAGGACAGAGCATGACACTGCAGTGTACCCAGGATATGAACCATAACTACATGTACTGGTATCGACAAGACCCAGGCATGGGGCTGAAGCTGATTTATTATTCAGTTGGTGCTGGTATCACTGATAAAGGAGAAGTCCCGAATGGCTACAACGTCTCCAGATCAACCACAGAGGATTTCCCGCTCAGGCTGGAGTTGGCTGCTCCCTCCCAGACATCTGTGTACTTCTGTGCCAGCAGTTACNNNNCAGATACGCAGTATTTTGGCCCAGGCACCCGGCTGACAGTGCTCG	NAGVTQTPKFRILKIGQSMTLQCTQDMNHNYMYWYRQDPGMGLKLIYYSVGAGITDKGEVPNGYNVSRSTTEDFPLRLELAAPSQTSVYFCASSYRPDTQYFGPGTRLTVL	NAGVTQTPKFRILKIGQSMTLQCTQDMNHNYMYWYRQDPGMGLKLIYYSVGAGITDKGEVPNGYNVSRSTTEDFPLRLELAAPSQTSVYFCASSYXXDTQYFGPGTRLTVL	1	285			290	334	AATGCTGGTGTCACTCAGACCCCAAAATTCCGCATCCTGAAGATAGGACAGAGCATGACACTGCAGTGTACCCAGGATATGAACCATAACTACATGTACTGGTATCGACAAGACCCAGGCATGGGGCTGAAGCTGATTTATTATTCAGTTGGTGCTGGTATCACTGATAAAGGAGAAGTCCCGAATGGCTACAACGTCTCCAGATCAACCACAGAGGATTTCCCGCTCAGGCTGGAGTTGGCTGCTCCCTCCCAGACATCTGTGTACTTCTGTGCCAGCAGTTAC	NAGVTQTPKFRILKIGQSMTLQCTQDMNHNYMYWYRQDPGMGLKLIYYSVGAGITDKGEVPNGYNVSRSTTEDFPLRLELAAPSQTSVYFCASSY	AATGCTGGTGTCACTCAGACCCCAAAATTCCGCATCCTGAAGATAGGACAGAGCATGACACTGCAGTGTACCCAGGATATGAACCATAACTACATGTACTGGTATCGACAAGACCCAGGCATGGGGCTGAAGCTGATTTATTATTCAGTTGGTGCTGGTATCACTGATAAAGGAGAAGTCCCGAATGGCTACAACGTCTCCAGATCAACCACAGAGGATTTCCCGCTCAGGCTGGAGTTGGCTGCTCCCTCCCAGACATCTGTGTACTTCTGTGCCAGCAGTTAC	NAGVTQTPKFRILKIGQSMTLQCTQDMNHNYMYWYRQDPGMGLKLIYYSVGAGITDKGEVPNGYNVSRSTTEDFPLRLELAAPSQTSVYFCASSY					CAGATACGCAGTATTTTGGCCCAGGCACCCGGCTGACAGTGCTCG	DTQYFGPGTRLTVL	CAGATACGCAGTATTTTGGCCCAGGCACCCGGCTGACAGTGCTCG	DTQYFGPGTRLTVL	AATGCTGGTGTCACTCAGACCCCAAAATTCCGCATCCTGAAGATAGGACAGAGCATGACACTGCAGTGTACCCAGGAT	NAGVTQTPKFRILKIGQSMTLQCTQD	ATGAACCATAACTAC	MNHNY	ATGTACTGGTATCGACAAGACCCAGGCATGGGGCTGAAGCTGATTTATTAT	MYWYRQDPGMGLKLIYY	TCAGTTGGTGCTGGTATC	SVGAGI
Pat726	KW11	GGAATAAAGAGAGCTC	TCRbeta	tig00000021_GGAATAAAGAGAGCTC	450	424	1	AACAATATGTTCTGGTATCGACAAGACCTGGGACATGGGCTGAGGCTGATCCATTACTCATATGGTGTTCAAGACACTAACAAAGGAGAAGTCTCAGATGGCTACAGTGTCTCTAGATCAAACACAGAGGACCTCCCCCTCACTCTGGAGTCTGCTGCCTCCTCCCAGACATCTGTATATTTCTGCGCCAGCAGTGAATTTAGGCAGGGGATATTCTGGGGCCAACGTCCTGACTTTGGGAACGGGACCAGGCTCACTGTGACAG	NNMFWYRQDLGHGLRLIHYSYGVQDTNKGEVSDGYSVSRSNTEDLPLTLESAASSQTSVYFCASSEFRQGIFWGQRPDFGNGTRLTVT	TRB	F	T	F	T	F	F	TRBV10-1*01	TRBD1*01	TRBJ1-6*02	AACAATATGTTCTGGTATCGACAAGACCTGGGACATGGGCTGAGGCTGATCCATTACTCATATGGTGTTCAAGACACTAACAAAGGAGAAGTCTCAGATGGCTACAGTGTCTCTAGATCAAACACAGAGGACCTCCCCCTCACTCTGGAGTCTGCTGCCTCCTCCCAGACATCTGTATATTTCTGCGCCAGCAGTGAATTTAGGCAGGGGATATTCTGGGGCCAACGTCCTGACTTTGGGAACGGGACCAGGCTCACTGTGACAG	AACAATATGTTCTGGTATCGACAAGACCTGGGACATGGGCTGAGGCTGATCCATTACTCATATGGTGTTCAAGACACTAACAAAGGAGAAGTCTCAGATGGCTACAGTGTCTCTAGATCAAACACAGAGGACCTCCCCCTCACTCTGGAGTCTGCTGCCTCCTCCCAGACATCTGTATATTTCTGCGCCAGCAGTGANNNNNNNCAGGGGNNNNNNNNNNNNNNNNNNNNNNACTTTGGGAACGGGACCAGGCTCACTGTGACAG	NNMFWYRQDLGHGLRLIHYSYGVQDTNKGEVSDGYSVSRSNTEDLPLTLESAASSQTSVYFCASSEFRQGIFWGQRPDFGNGTRLTVT	NNMFWYRQDLGHGLRLIHYSYGVQDTNKGEVSDGYSVSRSNTEDLPLTLESAASSQTSVYFCASSXXXQGXXXXXXXXFGNGTRLTVT	1	197	205	210	233	265	AACAATATGTTCTGGTATCGACAAGACCTGGGACATGGGCTGAGGCTGATCCATTACTCATATGGTGTTCAAGACACTAACAAAGGAGAAGTCTCAGATGGCTACAGTGTCTCTAGATCAAACACAGAGGACCTCCCCCTCACTCTGGAGTCTGCTGCCTCCTCCCAGACATCTGTATATTTCTGCGCCAGCAGTGA	NNMFWYRQDLGHGLRLIHYSYGVQDTNKGEVSDGYSVSRSNTEDLPLTLESAASSQTSVYFCASS	AACAATATGTTCTGGTATCGACAAGACCTGGGACATGGGCTGAGGCTGATCCATTACTCATATGGTGTTCAAGACACTAACAAAGGAGAAGTCTCAGATGGCTACAGTGTCTCTAGATCAAACACAGAGGACCTCCCCCTCACTCTGGAGTCTGCTGCCTCCTCCCAGACATCTGTATATTTCTGCGCCAGCAGTGA	NNMFWYRQDLGHGLRLIHYSYGVQDTNKGEVSDGYSVSRSNTEDLPLTLESAASSQTSVYFCASS	CAGGGG	QG	CAGGGG	QG	ACTTTGGGAACGGGACCAGGCTCACTGTGACAG	FGNGTRLTVT	ACTTTGGGAACGGGACCAGGCTCACTGTGACAG	FGNGTRLTVT			AACAAT	NN	ATGTTCTGGTATCGACAAGACCTGGGACATGGGCTGAGGCTGATCCATTAC	MFWYRQDLGHGLRLIHY	TCATATGGTGTTCAAGAC	SYGVQD
Pat726	IW9	GGCAATTCAACACGCC	TCRbeta	tig00000003_GGCAATTCAACACGCC	920	398	1	GACACTGAAGTTACCCAGACACCAAAACACCTGGTCATGGGAATGACAAATAAGAAGTCTTTGAAATGTGAACAACATATGGGGCACAGGGCTATGTATTGGTACAAGCAGAAAGCTAAGAAGCCACCGGAGCTCATGTTTGTCTACAGCTATGAGAAACTCTCTATAAATGAAAGTGTGCCAAGTCGCTTCTCACCTGAATGCCCCAACAGCTCTCTCTTAAACCTTCACCTACACGCCCTGCAGCCAGAAGACTCAGCCCTGTATCTCTGCGCCAGCAGCCAAGAGGGGGAGGACAATCAGCCCCAGCATTTTGGTGATGGGACTCGACTCTCCATCCTAG	DTEVTQTPKHLVMGMTNKKSLKCEQHMGHRAMYWYKQKAKKPPELMFVYSYEKLSINESVPSRFSPECPNSSLLNLHLHALQPEDSALYLCASSQEGEDNQPQHFGDGTRLSIL	TRB	F	T	F	T	F	T	TRBV4-1*01	TRBD2*02	TRBJ1-5*01	GACACTGAAGTTACCCAGACACCAAAACACCTGGTCATGGGAATGACAAATAAGAAGTCTTTGAAATGTGAACAACATATGGGGCACAGGGCTATGTATTGGTACAAGCAGAAAGCTAAGAAGCCACCGGAGCTCATGTTTGTCTACAGCTATGAGAAACTCTCTATAAATGAAAGTGTGCCAAGTCGCTTCTCACCTGAATGCCCCAACAGCTCTCTCTTAAACCTTCACCTACACGCCCTGCAGCCAGAAGACTCAGCCCTGTATCTCTGCGCCAGCAGCCAAGAGGGGGAGGACAATCAGCCCCAGCATTTTGGTGATGGGACTCGACTCTCCATCCTAG	GACACTGAAGTTACCCAGACACCAAAACACCTGGTCATGGGAATGACAAATAAGAAGTCTTTGAAATGTGAACAACATATGGGGCACAGGGCTATGTATTGGTACAAGCAGAAAGCTAAGAAGCCACCGGAGCTCATGTTTGTCTACAGCTATGAGAAACTCTCTATAAATGAAAGTGTGCCAAGTCGCTTCTCACCTGAATGCCCCAACAGCTCTCTCTTAAACCTTCACCTACACGCCCTGCAGCCAGAAGACTCAGCCCTGTATCTCTGCGCCAGCAGCCAAGANNGGGAGGNCAATCAGCCCCAGCATTTTGGTGATGGGACTCGACTCTCCATCCTAG	DTEVTQTPKHLVMGMTNKKSLKCEQHMGHRAMYWYKQKAKKPPELMFVYSYEKLSINESVPSRFSPECPNSSLLNLHLHALQPEDSALYLCASSQEGEDNQPQHFGDGTRLSIL	DTEVTQTPKHLVMGMTNKKSLKCEQHMGHRAMYWYKQKAKKPPELMFVYSYEKLSINESVPSRFSPECPNSSLLNLHLHALQPEDSALYLCASSQXXEXNQPQHFGDGTRLSIL	1	287	290	295	297	343	GACACTGAAGTTACCCAGACACCAAAACACCTGGTCATGGGAATGACAAATAAGAAGTCTTTGAAATGTGAACAACATATGGGGCACAGGGCTATGTATTGGTACAAGCAGAAAGCTAAGAAGCCACCGGAGCTCATGTTTGTCTACAGCTATGAGAAACTCTCTATAAATGAAAGTGTGCCAAGTCGCTTCTCACCTGAATGCCCCAACAGCTCTCTCTTAAACCTTCACCTACACGCCCTGCAGCCAGAAGACTCAGCCCTGTATCTCTGCGCCAGCAGCCAAGA	DTEVTQTPKHLVMGMTNKKSLKCEQHMGHRAMYWYKQKAKKPPELMFVYSYEKLSINESVPSRFSPECPNSSLLNLHLHALQPEDSALYLCASSQ	GACACTGAAGTTACCCAGACACCAAAACACCTGGTCATGGGAATGACAAATAAGAAGTCTTTGAAATGTGAACAACATATGGGGCACAGGGCTATGTATTGGTACAAGCAGAAAGCTAAGAAGCCACCGGAGCTCATGTTTGTCTACAGCTATGAGAAACTCTCTATAAATGAAAGTGTGCCAAGTCGCTTCTCACCTGAATGCCCCAACAGCTCTCTCTTAAACCTTCACCTACACGCCCTGCAGCCAGAAGACTCAGCCCTGTATCTCTGCGCCAGCAGCCAAGA	DTEVTQTPKHLVMGMTNKKSLKCEQHMGHRAMYWYKQKAKKPPELMFVYSYEKLSINESVPSRFSPECPNSSLLNLHLHALQPEDSALYLCASSQ	GGGAGG	E	GGGAGG	E	CAATCAGCCCCAGCATTTTGGTGATGGGACTCGACTCTCCATCCTAG	NQPQHFGDGTRLSIL	CAATCAGCCCCAGCATTTTGGTGATGGGACTCGACTCTCCATCCTAG	NQPQHFGDGTRLSIL	GACACTGAAGTTACCCAGACACCAAAACACCTGGTCATGGGAATGACAAATAAGAAGTCTTTGAAATGTGAACAACAT	DTEVTQTPKHLVMGMTNKKSLKCEQH	ATGGGGCACAGGGCT	MGHRA	ATGTATTGGTACAAGCAGAAAGCTAAGAAGCCACCGGAGCTCATGTTTGTC	MYWYKQKAKKPPELMFV	TACAGCTATGAGAAACTC	YSYEKL
Pat726	IW9	GGCAATTGTCCAGTGC	TCRbeta	tig00000016_GGCAATTGTCCAGTGC	1127	144	1	GATACTGGAGTCTCCCAGGACCCCAGACACAAGATCACAAAGAGGGGACAGAATGTAACTTTCAGGTGTGATCCAATTTCTGAACACAACCGCCTTTATTGGTACCGACAGACCCTGGGGCAGGGCCCAGAGTTTCTGACTTACTTCCAGAATGAAGCTCAACTAGAAAAATCAAGGCTGCTCAGTGATCGGTTCTCTGCAGAGAGGCCTAAGGGATCTTTCTCCACCTTGGAGATCCAGCGCACAGAGCAGGGGGACTCGGCCATGTATCTCTGTGCCAGCAGCCCACTAGCGGGGGGGAACGAGCAGTACTTCGGGCCGGGCACCAGGCTCACGGTCACAG	DTGVSQDPRHKITKRGQNVTFRCDPISEHNRLYWYRQTLGQGPEFLTYFQNEAQLEKSRLLSDRFSAERPKGSFSTLEIQRTEQGDSAMYLCASSPLAGGNEQYFGPGTRLTVT	TRB	F	T	F	T	F	T	TRBV7-9*03	TRBD2*01	TRBJ2-7*01	GATACTGGAGTCTCCCAGGACCCCAGACACAAGATCACAAAGAGGGGACAGAATGTAACTTTCAGGTGTGATCCAATTTCTGAACACAACCGCCTTTATTGGTACCGACAGACCCTGGGGCAGGGCCCAGAGTTTCTGACTTACTTCCAGAATGAAGCTCAACTAGAAAAATCAAGGCTGCTCAGTGATCGGTTCTCTGCAGAGAGGCCTAAGGGATCTTTCTCCACCTTGGAGATCCAGCGCACAGAGCAGGGGGACTCGGCCATGTATCTCTGTGCCAGCAGCCCACTAGCGGGGGGGAACGAGCAGTACTTCGGGCCGGGCACCAGGCTCACGGTCACAG	GATACTGGAGTCTCCCAGGACCCCAGACACAAGATCACAAAGAGGGGACAGAATGTAACTTTCAGGTGTGATCCAATTTCTGAACACAACCGCCTTTATTGGTACCGACAGACCCTGGGGCAGGGCCCAGAGTTTCTGACTTACTTCCAGAATGAAGCTCAACTAGAAAAATCAAGGCTGCTCAGTGATCGGTTCTCTGCAGAGAGGCCTAAGGGATCTTTCTCCACCTTGGAGATCCAGCGCACAGAGCAGGGGGACTCGGCCATGTATCTCTGTGCCAGCAGCNNACTAGCGGGGGGGNACGAGCAGTACTTCGGGCCGGGCACCAGGCTCACGGTCACAG	DTGVSQDPRHKITKRGQNVTFRCDPISEHNRLYWYRQTLGQGPEFLTYFQNEAQLEKSRLLSDRFSAERPKGSFSTLEIQRTEQGDSAMYLCASSPLAGGNEQYFGPGTRLTVT	DTGVSQDPRHKITKRGQNVTFRCDPISEHNRLYWYRQTLGQGPEFLTYFQNEAQLEKSRLLSDRFSAERPKGSFSTLEIQRTEQGDSAMYLCASSXLAGGXEQYFGPGTRLTVT	1	285	288	300	302	343	GATACTGGAGTCTCCCAGGACCCCAGACACAAGATCACAAAGAGGGGACAGAATGTAACTTTCAGGTGTGATCCAATTTCTGAACACAACCGCCTTTATTGGTACCGACAGACCCTGGGGCAGGGCCCAGAGTTTCTGACTTACTTCCAGAATGAAGCTCAACTAGAAAAATCAAGGCTGCTCAGTGATCGGTTCTCTGCAGAGAGGCCTAAGGGATCTTTCTCCACCTTGGAGATCCAGCGCACAGAGCAGGGGGACTCGGCCATGTATCTCTGTGCCAGCAGC	DTGVSQDPRHKITKRGQNVTFRCDPISEHNRLYWYRQTLGQGPEFLTYFQNEAQLEKSRLLSDRFSAERPKGSFSTLEIQRTEQGDSAMYLCASS	GATACTGGAGTCTCCCAGGACCCCAGACACAAGATCACAAAGAGGGGACAGAATGTAACTTTCAGGTGTGATCCAATTTCTGAACACAACCGCCTTTATTGGTACCGACAGACCCTGGGGCAGGGCCCAGAGTTTCTGACTTACTTCCAGAATGAAGCTCAACTAGAAAAATCAAGGCTGCTCAGTGATCGGTTCTCTGCAGAGAGGCCTAAGGGATCTTTCTCCACCTTGGAGATCCAGCGCACAGAGCAGGGGGACTCGGCCATGTATCTCTGTGCCAGCAGC	DTGVSQDPRHKITKRGQNVTFRCDPISEHNRLYWYRQTLGQGPEFLTYFQNEAQLEKSRLLSDRFSAERPKGSFSTLEIQRTEQGDSAMYLCASS	ACTAGCGGGGGGG	LAGG	ACTAGCGGGGGGG	LAGG	ACGAGCAGTACTTCGGGCCGGGCACCAGGCTCACGGTCACAG	EQYFGPGTRLTVT	ACGAGCAGTACTTCGGGCCGGGCACCAGGCTCACGGTCACAG	EQYFGPGTRLTVT	GATACTGGAGTCTCCCAGGACCCCAGACACAAGATCACAAAGAGGGGACAGAATGTAACTTTCAGGTGTGATCCAATT	DTGVSQDPRHKITKRGQNVTFRCDPI	TCTGAACACAACCGC	SEHNR	CTTTATTGGTACCGACAGACCCTGGGGCAGGGCCCAGAGTTTCTGACTTAC	LYWYRQTLGQGPEFLTY	TTCCAGAATGAAGCTCAA	FQNEAQ
Pat726	IW9	GGGATGAGTTGTCTTT	TCRbeta	tig00000185_GGGATGAGTTGTCTTT	1030	74	1	GCTGCTGGAGTCATCCAGTCCCCAAGACATCTGATCAAAGAAAAGAGGGAAACAGCCACTCTGAAATGCTATCCTATCCCTAGACACGACACTGTCTACTGGTACCAGCAGGGTCCAGGTCAGGACCCCCAGTTCCTCATTTCGTTTTATGAAAAGATGCAGAGCGATAAAGGAAGCATCCCTGATCGATTCTCAGCTCAACAGTTCAGTGACTATCATTCTGAACTGAACATGAGCTCCTTGGAGCTGGGGGACTCAGCCCTGTACTTCTGTGCCAGCACTCCAGGGTCTGGGGGCTACACCTTCGGTTCGGGGACCAGGTTAACCGTTGTAG	AAGVIQSPRHLIKEKRETATLKCYPIPRHDTVYWYQQGPGQDPQFLISFYEKMQSDKGSIPDRFSAQQFSDYHSELNMSSLELGDSALYFCASTPGSGGYTFGSGTRLTVV	TRB	F	T	F	T	F	T	TRBV13*01	TRBD1*01	TRBJ1-2*01	GCTGCTGGAGTCATCCAGTCCCCAAGACATCTGATCAAAGAAAAGAGGGAAACAGCCACTCTGAAATGCTATCCTATCCCTAGACACGACACTGTCTACTGGTACCAGCAGGGTCCAGGTCAGGACCCCCAGTTCCTCATTTCGTTTTATGAAAAGATGCAGAGCGATAAAGGAAGCATCCCTGATCGATTCTCAGCTCAACAGTTCAGTGACTATCATTCTGAACTGAACATGAGCTCCTTGGAGCTGGGGGACTCAGCCCTGTACTTCTGTGCCAGCACTCCAGGGTCTGGGGGCTACACCTTCGGTTCGGGGACCAGGTTAACCGTTGTAG	GCTGCTGGAGTCATCCAGTCCCCAAGACATCTGATCAAAGAAAAGAGGGAAACAGCCACTCTGAAATGCTATCCTATCCCTAGACACGACACTGTCTACTGGTACCAGCAGGGTCCAGGTCAGGACCCCCAGTTCCTCATTTCGTTTTATGAAAAGATGCAGAGCGATAAAGGAAGCATCCCTGATCGATTCTCAGCTCAACAGTTCAGTGACTATCATTCTGAACTGAACATGAGCTCCTTGGAGCTGGGGGACTCAGCCCTGTACTTCTGTGCCAGCANNNCAGGGNNNNNNGGCTACACCTTCGGTTCGGGGACCAGGTTAACCGTTGTAG	AAGVIQSPRHLIKEKRETATLKCYPIPRHDTVYWYQQGPGQDPQFLISFYEKMQSDKGSIPDRFSAQQFSDYHSELNMSSLELGDSALYFCASTPGSGGYTFGSGTRLTVV	AAGVIQSPRHLIKEKRETATLKCYPIPRHDTVYWYQQGPGQDPQFLISFYEKMQSDKGSIPDRFSAQQFSDYHSELNMSSLELGDSALYFCASXXGXXGYTFGSGTRLTVV	1	280	284	288	295	334	GCTGCTGGAGTCATCCAGTCCCCAAGACATCTGATCAAAGAAAAGAGGGAAACAGCCACTCTGAAATGCTATCCTATCCCTAGACACGACACTGTCTACTGGTACCAGCAGGGTCCAGGTCAGGACCCCCAGTTCCTCATTTCGTTTTATGAAAAGATGCAGAGCGATAAAGGAAGCATCCCTGATCGATTCTCAGCTCAACAGTTCAGTGACTATCATTCTGAACTGAACATGAGCTCCTTGGAGCTGGGGGACTCAGCCCTGTACTTCTGTGCCAGCA	AAGVIQSPRHLIKEKRETATLKCYPIPRHDTVYWYQQGPGQDPQFLISFYEKMQSDKGSIPDRFSAQQFSDYHSELNMSSLELGDSALYFCAS	GCTGCTGGAGTCATCCAGTCCCCAAGACATCTGATCAAAGAAAAGAGGGAAACAGCCACTCTGAAATGCTATCCTATCCCTAGACACGACACTGTCTACTGGTACCAGCAGGGTCCAGGTCAGGACCCCCAGTTCCTCATTTCGTTTTATGAAAAGATGCAGAGCGATAAAGGAAGCATCCCTGATCGATTCTCAGCTCAACAGTTCAGTGACTATCATTCTGAACTGAACATGAGCTCCTTGGAGCTGGGGGACTCAGCCCTGTACTTCTGTGCCAGCA	AAGVIQSPRHLIKEKRETATLKCYPIPRHDTVYWYQQGPGQDPQFLISFYEKMQSDKGSIPDRFSAQQFSDYHSELNMSSLELGDSALYFCAS	CAGGG	G	CAGGG	G	GGCTACACCTTCGGTTCGGGGACCAGGTTAACCGTTGTAG	GYTFGSGTRLTVV	GGCTACACCTTCGGTTCGGGGACCAGGTTAACCGTTGTAG	GYTFGSGTRLTVV	GCTGCTGGAGTCATCCAGTCCCCAAGACATCTGATCAAAGAAAAGAGGGAAACAGCCACTCTGAAATGCTATCCTATC	AAGVIQSPRHLIKEKRETATLKCYPI	CCTAGACACGACACT	PRHDT	GTCTACTGGTACCAGCAGGGTCCAGGTCAGGACCCCCAGTTCCTCATTTCG	VYWYQQGPGQDPQFLIS	TTTTATGAAAAGATGCAG	FYEKMQ
Pat726	KW11	GTACGTAAGTGTCCCG	TCRbeta	tig00000006_GTACGTAAGTGTCCCG	918	196	1	GGTGCTGGAGTCTCCCAGTCCCCTAGGTACAAAGTCGCAAAGAGAGGACAGGATGTAGCTCTCAGGTGTGATCCAATTTCGGGTCATGTATCCCTTTTTTGGTACCAACAGGCCCTGGGGCAGGGGCCAGAGTTTCTGACTTATTTCCAGAATGAAGCTCAACTAGACAAATCGGGGCTGCCCAGTGATCGCTTCTTTGCAGAAAGGCCTGAGGGATCCGTCTCCACTCTGAAGATCCAGCGCACACAGCAGGAGGACTCCGCCGTGTATCTCTGTGCCAGCAGCCTAACGGATGACACTGAAGCTTTCTTTGGACAAGGCACCAGACTCACAGTTGTAG	GAGVSQSPRYKVAKRGQDVALRCDPISGHVSLFWYQQALGQGPEFLTYFQNEAQLDKSGLPSDRFFAERPEGSVSTLKIQRTQQEDSAVYLCASSLTDDTEAFFGQGTRLTVV	TRB	F	T	F	T	F	T	TRBV7-8*01		TRBJ1-1*01	GGTGCTGGAGTCTCCCAGTCCCCTAGGTACAAAGTCGCAAAGAGAGGACAGGATGTAGCTCTCAGGTGTGATCCAATTTCGGGTCATGTATCCCTTTTTTGGTACCAACAGGCCCTGGGGCAGGGGCCAGAGTTTCTGACTTATTTCCAGAATGAAGCTCAACTAGACAAATCGGGGCTGCCCAGTGATCGCTTCTTTGCAGAAAGGCCTGAGGGATCCGTCTCCACTCTGAAGATCCAGCGCACACAGCAGGAGGACTCCGCCGTGTATCTCTGTGCCAGCAGCCTAACGGATGACACTGAAGCTTTCTTTGGACAAGGCACCAGACTCACAGTTGTAG	GGTGCTGGAGTCTCCCAGTCCCCTAGGTACAAAGTCGCAAAGAGAGGACAGGATGTAGCTCTCAGGTGTGATCCAATTTCGGGTCATGTATCCCTTTTTTGGTACCAACAGGCCCTGGGGCAGGGGCCAGAGTTTCTGACTTATTTCCAGAATGAAGCTCAACTAGACAAATCGGGGCTGCCCAGTGATCGCTTCTTTGCAGAAAGGCCTGAGGGATCCGTCTCCACTCTGAAGATCCAGCGCACACAGCAGGAGGACTCCGCCGTGTATCTCTGTGCCAGCAGCTTANNNNNNNACACTGAAGCTTTCTTTGGACAAGGCACCAGACTCACAGTTGTAG	GAGVSQSPRYKVAKRGQDVALRCDPISGHVSLFWYQQALGQGPEFLTYFQNEAQLDKSGLPSDRFFAERPEGSVSTLKIQRTQQEDSAVYLCASSLTDDTEAFFGQGTRLTVV	GAGVSQSPRYKVAKRGQDVALRCDPISGHVSLFWYQQALGQGPEFLTYFQNEAQLDKSGLPSDRFFAERPEGSVSTLKIQRTQQEDSAVYLCASSLXXXTEAFFGQGTRLTVV	1	288			296	340	GGTGCTGGAGTCTCCCAGTCCCCTAGGTACAAAGTCGCAAAGAGAGGACAGGATGTAGCTCTCAGGTGTGATCCAATTTCGGGTCATGTATCCCTTTTTTGGTACCAACAGGCCCTGGGGCAGGGGCCAGAGTTTCTGACTTATTTCCAGAATGAAGCTCAACTAGACAAATCGGGGCTGCCCAGTGATCGCTTCTTTGCAGAAAGGCCTGAGGGATCCGTCTCCACTCTGAAGATCCAGCGCACACAGCAGGAGGACTCCGCCGTGTATCTCTGTGCCAGCAGCCTA	GAGVSQSPRYKVAKRGQDVALRCDPISGHVSLFWYQQALGQGPEFLTYFQNEAQLDKSGLPSDRFFAERPEGSVSTLKIQRTQQEDSAVYLCASSL	GGTGCTGGAGTCTCCCAGTCCCCTAGGTACAAAGTCGCAAAGAGAGGACAGGATGTAGCTCTCAGGTGTGATCCAATTTCGGGTCATGTATCCCTTTTTTGGTACCAACAGGCCCTGGGGCAGGGGCCAGAGTTTCTGACTTATTTCCAGAATGAAGCTCAACTAGACAAATCGGGGCTGCCCAGTGATCGCTTCTTTGCAGAAAGGCCTGAGGGATCCGTCTCCACTCTGAAGATCCAGCGCACACAGCAGGAGGACTCCGCCGTGTATCTCTGTGCCAGCAGCTTA	GAGVSQSPRYKVAKRGQDVALRCDPISGHVSLFWYQQALGQGPEFLTYFQNEAQLDKSGLPSDRFFAERPEGSVSTLKIQRTQQEDSAVYLCASSL					ACACTGAAGCTTTCTTTGGACAAGGCACCAGACTCACAGTTGTAG	TEAFFGQGTRLTVV	ACACTGAAGCTTTCTTTGGACAAGGCACCAGACTCACAGTTGTAG	TEAFFGQGTRLTVV	GGTGCTGGAGTCTCCCAGTCCCCTAGGTACAAAGTCGCAAAGAGAGGACAGGATGTAGCTCTCAGGTGTGATCCAATT	GAGVSQSPRYKVAKRGQDVALRCDPI	TCGGGTCATGTATCC	SGHVS	CTTTTTTGGTACCAACAGGCCCTGGGGCAGGGGCCAGAGTTTCTGACTTAT	LFWYQQALGQGPEFLTY	TTCCAGAATGAAGCTCAA	FQNEAQ
Pat726	IW9	GTACTCCTCTCAACTT	TCRbeta	tig00000013_GTACTCCTCTCAACTT	1112	90	1	AATGCTGGTGTCACTCAGACCCCAAAATTCCAGGTCCTGAAGACAGGACAGAGCATGACACTGCAGTGTGCCCAGGATATGAACCATGAATACATGTCCTGGTATCGACAAGACCCAGGCATGGGGCTGAGGCTGATTCATTACTCAGTTGGTGCTGGTATCACTGACCAAGGAGAAGTCCCCAATGGCTACAATGTCTCCAGATCAACCACAGAGGATTTCCCGCTCAGGCTGCTGTCGGCTGCTCCCTCCCAGACATCTGTGTACTTCTGTGCCAGCAGTTACGTAGCGGGGGGGCCCGGAGAGACCCAGTACTTCGGGCCAGGCACGCGGCTCCTGGTGCTCG	NAGVTQTPKFQVLKTGQSMTLQCAQDMNHEYMSWYRQDPGMGLRLIHYSVGAGITDQGEVPNGYNVSRSTTEDFPLRLLSAAPSQTSVYFCASSYVAGGPGETQYFGPGTRLLVL	TRB	F	T	F	T	F	T	TRBV6-5*01	TRBD2*01	TRBJ2-5*01	AATGCTGGTGTCACTCAGACCCCAAAATTCCAGGTCCTGAAGACAGGACAGAGCATGACACTGCAGTGTGCCCAGGATATGAACCATGAATACATGTCCTGGTATCGACAAGACCCAGGCATGGGGCTGAGGCTGATTCATTACTCAGTTGGTGCTGGTATCACTGACCAAGGAGAAGTCCCCAATGGCTACAATGTCTCCAGATCAACCACAGAGGATTTCCCGCTCAGGCTGCTGTCGGCTGCTCCCTCCCAGACATCTGTGTACTTCTGTGCCAGCAGTTACGTAGCGGGGGGGCCCGGAGAGACCCAGTACTTCGGGCCAGGCACGCGGCTCCTGGTGCTCG	AATGCTGGTGTCACTCAGACCCCAAAATTCCAGGTCCTGAAGACAGGACAGAGCATGACACTGCAGTGTGCCCAGGATATGAACCATGAATACATGTCCTGGTATCGACAAGACCCAGGCATGGGGCTGAGGCTGATTCATTACTCAGTTGGTGCTGGTATCACTGACCAAGGAGAAGTCCCCAATGGCTACAATGTCTCCAGATCAACCACAGAGGATTTCCCGCTCAGGCTGCTGTCGGCTGCTCCCTCCCAGACATCTGTGTACTTCTGTGCCAGCAGTTACNTAGCGGGGGGGNNNNNAGAGACCCAGTACTTCGGGCCAGGCACGCGGCTCCTGGTGCTCG	NAGVTQTPKFQVLKTGQSMTLQCAQDMNHEYMSWYRQDPGMGLRLIHYSVGAGITDQGEVPNGYNVSRSTTEDFPLRLLSAAPSQTSVYFCASSYVAGGPGETQYFGPGTRLLVL	NAGVTQTPKFQVLKTGQSMTLQCAQDMNHEYMSWYRQDPGMGLRLIHYSVGAGITDQGEVPNGYNVSRSTTEDFPLRLLSAAPSQTSVYFCASSYXAGGXXETQYFGPGTRLLVL	1	285	287	297	303	346	AATGCTGGTGTCACTCAGACCCCAAAATTCCAGGTCCTGAAGACAGGACAGAGCATGACACTGCAGTGTGCCCAGGATATGAACCATGAATACATGTCCTGGTATCGACAAGACCCAGGCATGGGGCTGAGGCTGATTCATTACTCAGTTGGTGCTGGTATCACTGACCAAGGAGAAGTCCCCAATGGCTACAATGTCTCCAGATCAACCACAGAGGATTTCCCGCTCAGGCTGCTGTCGGCTGCTCCCTCCCAGACATCTGTGTACTTCTGTGCCAGCAGTTAC	NAGVTQTPKFQVLKTGQSMTLQCAQDMNHEYMSWYRQDPGMGLRLIHYSVGAGITDQGEVPNGYNVSRSTTEDFPLRLLSAAPSQTSVYFCASSY	AATGCTGGTGTCACTCAGACCCCAAAATTCCAGGTCCTGAAGACAGGACAGAGCATGACACTGCAGTGTGCCCAGGATATGAACCATGAATACATGTCCTGGTATCGACAAGACCCAGGCATGGGGCTGAGGCTGATTCATTACTCAGTTGGTGCTGGTATCACTGACCAAGGAGAAGTCCCCAATGGCTACAATGTCTCCAGATCAACCACAGAGGATTTCCCGCTCAGGCTGCTGTCGGCTGCTCCCTCCCAGACATCTGTGTACTTCTGTGCCAGCAGTTAC	NAGVTQTPKFQVLKTGQSMTLQCAQDMNHEYMSWYRQDPGMGLRLIHYSVGAGITDQGEVPNGYNVSRSTTEDFPLRLLSAAPSQTSVYFCASSY	TAGCGGGGGGG	AGG	TAGCGGGGGGG	AGG	AGAGACCCAGTACTTCGGGCCAGGCACGCGGCTCCTGGTGCTCG	ETQYFGPGTRLLVL	AGAGACCCAGTACTTCGGGCCAGGCACGCGGCTCCTGGTGCTCG	ETQYFGPGTRLLVL	AATGCTGGTGTCACTCAGACCCCAAAATTCCAGGTCCTGAAGACAGGACAGAGCATGACACTGCAGTGTGCCCAGGAT	NAGVTQTPKFQVLKTGQSMTLQCAQD	ATGAACCATGAATAC	MNHEY	ATGTCCTGGTATCGACAAGACCCAGGCATGGGGCTGAGGCTGATTCATTAC	MSWYRQDPGMGLRLIHY	TCAGTTGGTGCTGGTATC	SVGAGI
Pat726	IW9	GTATTCTCAAACCCAT	TCRbeta	tig00000029_GTATTCTCAAACCCAT	681	475	1	AATGCTGGTGTCACTCAGACCCCAAAATTCCAGGTCCTGAAGACAGGACAGAGCATGACACTGCAGTGTGCCCAGGATATGAACCATGAATACATGTCCTGGTATCGACAAGACCCAGGCATGGGGCTGAGGCTGATTCATTACTCAGTTGGTGCTGGTATCACTGACCAAGGAGAAGTCCCCAATGGCTACAATGTCTCCAGATCAACCACAGAGGATTTCCCGCTCAGGCTGCTGTCGGCTGCTCCCTCCCAGACATCTGTGTACTTCTGTGCCAGCAGTTACTTCCCGGGGTGGGACAATGAGCAGTTCTTCGGGCCAGGGACACGGCTCACCGTGCTAG	NAGVTQTPKFQVLKTGQSMTLQCAQDMNHEYMSWYRQDPGMGLRLIHYSVGAGITDQGEVPNGYNVSRSTTEDFPLRLLSAAPSQTSVYFCASSYFPGWDNEQFFGPGTRLTVL	TRB	F	T	F	T	F	T	TRBV6-5*01	TRBD2*01	TRBJ2-1*01	AATGCTGGTGTCACTCAGACCCCAAAATTCCAGGTCCTGAAGACAGGACAGAGCATGACACTGCAGTGTGCCCAGGATATGAACCATGAATACATGTCCTGGTATCGACAAGACCCAGGCATGGGGCTGAGGCTGATTCATTACTCAGTTGGTGCTGGTATCACTGACCAAGGAGAAGTCCCCAATGGCTACAATGTCTCCAGATCAACCACAGAGGATTTCCCGCTCAGGCTGCTGTCGGCTGCTCCCTCCCAGACATCTGTGTACTTCTGTGCCAGCAGTTACTTCCCGGGGTGGGACAATGAGCAGTTCTTCGGGCCAGGGACACGGCTCACCGTGCTAG	AATGCTGGTGTCACTCAGACCCCAAAATTCCAGGTCCTGAAGACAGGACAGAGCATGACACTGCAGTGTGCCCAGGATATGAACCATGAATACATGTCCTGGTATCGACAAGACCCAGGCATGGGGCTGAGGCTGATTCATTACTCAGTTGGTGCTGGTATCACTGACCAAGGAGAAGTCCCCAATGGCTACAATGTCTCCAGATCAACCACAGAGGATTTCCCGCTCAGGCTGCTGTCGGCTGCTCCCTCCCAGACATCTGTGTACTTCTGTGCCAGCAGTTACTNNNCGGGGNNNNACAATGAGCAGTTCTTCGGGCCAGGGACACGGCTCACCGTGCTAG	NAGVTQTPKFQVLKTGQSMTLQCAQDMNHEYMSWYRQDPGMGLRLIHYSVGAGITDQGEVPNGYNVSRSTTEDFPLRLLSAAPSQTSVYFCASSYFPGWDNEQFFGPGTRLTVL	NAGVTQTPKFQVLKTGQSMTLQCAQDMNHEYMSWYRQDPGMGLRLIHYSVGAGITDQGEVPNGYNVSRSTTEDFPLRLLSAAPSQTSVYFCASSYXXGXXNEQFFGPGTRLTVL	1	286	290	294	299	343	AATGCTGGTGTCACTCAGACCCCAAAATTCCAGGTCCTGAAGACAGGACAGAGCATGACACTGCAGTGTGCCCAGGATATGAACCATGAATACATGTCCTGGTATCGACAAGACCCAGGCATGGGGCTGAGGCTGATTCATTACTCAGTTGGTGCTGGTATCACTGACCAAGGAGAAGTCCCCAATGGCTACAATGTCTCCAGATCAACCACAGAGGATTTCCCGCTCAGGCTGCTGTCGGCTGCTCCCTCCCAGACATCTGTGTACTTCTGTGCCAGCAGTTACT	NAGVTQTPKFQVLKTGQSMTLQCAQDMNHEYMSWYRQDPGMGLRLIHYSVGAGITDQGEVPNGYNVSRSTTEDFPLRLLSAAPSQTSVYFCASSY	AATGCTGGTGTCACTCAGACCCCAAAATTCCAGGTCCTGAAGACAGGACAGAGCATGACACTGCAGTGTGCCCAGGATATGAACCATGAATACATGTCCTGGTATCGACAAGACCCAGGCATGGGGCTGAGGCTGATTCATTACTCAGTTGGTGCTGGTATCACTGACCAAGGAGAAGTCCCCAATGGCTACAATGTCTCCAGATCAACCACAGAGGATTTCCCGCTCAGGCTGCTGTCGGCTGCTCCCTCCCAGACATCTGTGTACTTCTGTGCCAGCAGTTACT	NAGVTQTPKFQVLKTGQSMTLQCAQDMNHEYMSWYRQDPGMGLRLIHYSVGAGITDQGEVPNGYNVSRSTTEDFPLRLLSAAPSQTSVYFCASSY	CGGGG	G	CGGGG	G	ACAATGAGCAGTTCTTCGGGCCAGGGACACGGCTCACCGTGCTAG	NEQFFGPGTRLTVL	ACAATGAGCAGTTCTTCGGGCCAGGGACACGGCTCACCGTGCTAG	NEQFFGPGTRLTVL	AATGCTGGTGTCACTCAGACCCCAAAATTCCAGGTCCTGAAGACAGGACAGAGCATGACACTGCAGTGTGCCCAGGAT	NAGVTQTPKFQVLKTGQSMTLQCAQD	ATGAACCATGAATAC	MNHEY	ATGTCCTGGTATCGACAAGACCCAGGCATGGGGCTGAGGCTGATTCATTAC	MSWYRQDPGMGLRLIHY	TCAGTTGGTGCTGGTATC	SVGAGI
Pat726	IW9	GTCACAAAGATCACGG	TCRbeta	tig00000004_GTCACAAAGATCACGG	1217	501	1	GATTCTGGAGTCACACAAACCCCAAAGCACCTGATCACAGCAACTGGACAGCGAGTGACGCTGAGATGCTCCCCTAGGTCTGGAGACCTCTCTGTGTACTGGTACCAACAGAGCCTGGACCAGGGCCTCCAGTTCCTCATTCAGTATTATAATGGAGAAGAGAGAGCAAAAGGAAACATTCTTGAACGATTCTCCGCACAACAGTTCCCTGACTTGCACTCTGAACTAAACCTGAGCTCTCTGGAGCTGGGGGACTCAGCTTTGTATTTCTGTGCCAGCAGCGTTGGTCAGGGGGGCGCCGGGGAGCTGTTTTTTGGAGAAGGCTCTAGGCTGACCGTACTGG	DSGVTQTPKHLITATGQRVTLRCSPRSGDLSVYWYQQSLDQGLQFLIQYYNGEERAKGNILERFSAQQFPDLHSELNLSSLELGDSALYFCASSVGQGGAGELFFGEGSRLTVL	TRB	F	T	F	T	F	T	TRBV9*01	TRBD1*01	TRBJ2-2*01	GATTCTGGAGTCACACAAACCCCAAAGCACCTGATCACAGCAACTGGACAGCGAGTGACGCTGAGATGCTCCCCTAGGTCTGGAGACCTCTCTGTGTACTGGTACCAACAGAGCCTGGACCAGGGCCTCCAGTTCCTCATTCAGTATTATAATGGAGAAGAGAGAGCAAAAGGAAACATTCTTGAACGATTCTCCGCACAACAGTTCCCTGACTTGCACTCTGAACTAAACCTGAGCTCTCTGGAGCTGGGGGACTCAGCTTTGTATTTCTGTGCCAGCAGCGTTGGTCAGGGGGGCGCCGGGGAGCTGTTTTTTGGAGAAGGCTCTAGGCTGACCGTACTGG	GATTCTGGAGTCACACAAACCCCAAAGCACCTGATCACAGCAACTGGACAGCGAGTGACGCTGAGATGCTCCCCTAGGTCTGGAGACCTCTCTGTGTACTGGTACCAACAGAGCCTGGACCAGGGCCTCCAGTTCCTCATTCAGTATTATAATGGAGAAGAGAGAGCAAAAGGAAACATTCTTGAACGATTCTCCGCACAACAGTTCCCTGACTTGCACTCTGAACTAAACCTGAGCTCTCTGGAGCTGGGGGACTCAGCTTTGTATTTCTGTGCCAGCAGCGTNNNNCAGGGGGNNNCCGGGGAGCTGTTTTTTGGAGAAGGCTCTAGGCTGACCGTACTGG	DSGVTQTPKHLITATGQRVTLRCSPRSGDLSVYWYQQSLDQGLQFLIQYYNGEERAKGNILERFSAQQFPDLHSELNLSSLELGDSALYFCASSVGQGGAGELFFGEGSRLTVL	DSGVTQTPKHLITATGQRVTLRCSPRSGDLSVYWYQQSLDQGLQFLIQYYNGEERAKGNILERFSAQQFPDLHSELNLSSLELGDSALYFCASSVXQGXXGELFFGEGSRLTVL	1	284	289	295	299	343	GATTCTGGAGTCACACAAACCCCAAAGCACCTGATCACAGCAACTGGACAGCGAGTGACGCTGAGATGCTCCCCTAGGTCTGGAGACCTCTCTGTGTACTGGTACCAACAGAGCCTGGACCAGGGCCTCCAGTTCCTCATTCAGTATTATAATGGAGAAGAGAGAGCAAAAGGAAACATTCTTGAACGATTCTCCGCACAACAGTTCCCTGACTTGCACTCTGAACTAAACCTGAGCTCTCTGGAGCTGGGGGACTCAGCTTTGTATTTCTGTGCCAGCAGCGT	DSGVTQTPKHLITATGQRVTLRCSPRSGDLSVYWYQQSLDQGLQFLIQYYNGEERAKGNILERFSAQQFPDLHSELNLSSLELGDSALYFCASSV	GATTCTGGAGTCACACAAACCCCAAAGCACCTGATCACAGCAACTGGACAGCGAGTGACGCTGAGATGCTCCCCTAGGTCTGGAGACCTCTCTGTGTACTGGTACCAACAGAGCCTGGACCAGGGCCTCCAGTTCCTCATTCAGTATTATAATGGAGAAGAGAGAGCAAAAGGAAACATTCTTGAACGATTCTCCGCACAACAGTTCCCTGACTTGCACTCTGAACTAAACCTGAGCTCTCTGGAGCTGGGGGACTCAGCTTTGTATTTCTGTGCCAGCAGCGT	DSGVTQTPKHLITATGQRVTLRCSPRSGDLSVYWYQQSLDQGLQFLIQYYNGEERAKGNILERFSAQQFPDLHSELNLSSLELGDSALYFCASSV	CAGGGGG	QG	CAGGGGG	QG	CCGGGGAGCTGTTTTTTGGAGAAGGCTCTAGGCTGACCGTACTGG	GELFFGEGSRLTVL	CCGGGGAGCTGTTTTTTGGAGAAGGCTCTAGGCTGACCGTACTGG	GELFFGEGSRLTVL	GATTCTGGAGTCACACAAACCCCAAAGCACCTGATCACAGCAACTGGACAGCGAGTGACGCTGAGATGCTCCCCTAGG	DSGVTQTPKHLITATGQRVTLRCSPR	TCTGGAGACCTCTCT	SGDLS	GTGTACTGGTACCAACAGAGCCTGGACCAGGGCCTCCAGTTCCTCATTCAG	VYWYQQSLDQGLQFLIQ	TATTATAATGGAGAAGAG	YYNGEE
Pat726	KW11	GTCCTCAGTGTTAAGA	TCRbeta	tig00000008_GTCCTCAGTGTTAAGA	649	331	1	GATGCTGGAATCACCCAGAGCCCAAGATACAAGATCACAGAGACAGGAAGGCAGGTGACCTTGATGTGTCACCAGACTTGGAGCCACAGCTATATGTTCTGGTATCGACAAGACCTGGGACATGGGCTGAGGCTGATCTATTACTCAGCAGCTGCTGATATTACAGATAAAGGAGAAGTCCCCGATGGCTATGTTGTCTCCAGATCCAAGACAGAGAATTTCCCCCTCACTCTGGAGTCAGCTACCCGCTCCCAGACATCTGTGTATTTCTGCGCCAGCAGGAGCGGGTATAGCTCCTACAATGAGCAGTTCTTCGGGCCAGGGACACGGCTCACCGTGCTAG	DAGITQSPRYKITETGRQVTLMCHQTWSHSYMFWYRQDLGHGLRLIYYSAAADITDKGEVPDGYVVSRSKTENFPLTLESATRSQTSVYFCASRSGYSSYNEQFFGPGTRLTVL	TRB	F	T	F	T	F	T	TRBV10-2*01	TRBD2*01	TRBJ2-1*01	GATGCTGGAATCACCCAGAGCCCAAGATACAAGATCACAGAGACAGGAAGGCAGGTGACCTTGATGTGTCACCAGACTTGGAGCCACAGCTATATGTTCTGGTATCGACAAGACCTGGGACATGGGCTGAGGCTGATCTATTACTCAGCAGCTGCTGATATTACAGATAAAGGAGAAGTCCCCGATGGCTATGTTGTCTCCAGATCCAAGACAGAGAATTTCCCCCTCACTCTGGAGTCAGCTACCCGCTCCCAGACATCTGTGTATTTCTGCGCCAGCAGGAGCGGGTATAGCTCCTACAATGAGCAGTTCTTCGGGCCAGGGACACGGCTCACCGTGCTAG	GATGCTGGAATCACCCAGAGCCCAAGATACAAGATCACAGAGACAGGAAGGCAGGTGACCTTGATGTGTCACCAGACTTGGAGCCACAGCTATATGTTCTGGTATCGACAAGACCTGGGACATGGGCTGAGGCTGATCTATTACTCAGCAGCTGCTGATATTACAGATAAAGGAGAAGTCCCCGATGGCTATGTTGTCTCCAGATCCAAGACAGAGAATTTCCCCCTCACTCTGGAGTCAGCTACCCGCTCCCAGACATCTGTGTATTTCTGCGCCAGCAGNAGCGGGNNNNNCTCCTACAATGAGCAGTTCTTCGGGCCAGGGACACGGCTCACCGTGCTAG	DAGITQSPRYKITETGRQVTLMCHQTWSHSYMFWYRQDLGHGLRLIYYSAAADITDKGEVPDGYVVSRSKTENFPLTLESATRSQTSVYFCASRSGYSSYNEQFFGPGTRLTVL	DAGITQSPRYKITETGRQVTLMCHQTWSHSYMFWYRQDLGHGLRLIYYSAAADITDKGEVPDGYVVSRSKTENFPLTLESATRSQTSVYFCASXSGXXSYNEQFFGPGTRLTVL	1	281	283	288	294	343	GATGCTGGAATCACCCAGAGCCCAAGATACAAGATCACAGAGACAGGAAGGCAGGTGACCTTGATGTGTCACCAGACTTGGAGCCACAGCTATATGTTCTGGTATCGACAAGACCTGGGACATGGGCTGAGGCTGATCTATTACTCAGCAGCTGCTGATATTACAGATAAAGGAGAAGTCCCCGATGGCTATGTTGTCTCCAGATCCAAGACAGAGAATTTCCCCCTCACTCTGGAGTCAGCTACCCGCTCCCAGACATCTGTGTATTTCTGCGCCAGCAG	DAGITQSPRYKITETGRQVTLMCHQTWSHSYMFWYRQDLGHGLRLIYYSAAADITDKGEVPDGYVVSRSKTENFPLTLESATRSQTSVYFCAS	GATGCTGGAATCACCCAGAGCCCAAGATACAAGATCACAGAGACAGGAAGGCAGGTGACCTTGATGTGTCACCAGACTTGGAGCCACAGCTATATGTTCTGGTATCGACAAGACCTGGGACATGGGCTGAGGCTGATCTATTACTCAGCAGCTGCTGATATTACAGATAAAGGAGAAGTCCCCGATGGCTATGTTGTCTCCAGATCCAAGACAGAGAATTTCCCCCTCACTCTGGAGTCAGCTACCCGCTCCCAGACATCTGTGTATTTCTGCGCCAGCAG	DAGITQSPRYKITETGRQVTLMCHQTWSHSYMFWYRQDLGHGLRLIYYSAAADITDKGEVPDGYVVSRSKTENFPLTLESATRSQTSVYFCAS	AGCGGG	SG	AGCGGG	SG	CTCCTACAATGAGCAGTTCTTCGGGCCAGGGACACGGCTCACCGTGCTAG	SYNEQFFGPGTRLTVL	CTCCTACAATGAGCAGTTCTTCGGGCCAGGGACACGGCTCACCGTGCTAG	SYNEQFFGPGTRLTVL	GATGCTGGAATCACCCAGAGCCCAAGATACAAGATCACAGAGACAGGAAGGCAGGTGACCTTGATGTGTCACCAGACT	DAGITQSPRYKITETGRQVTLMCHQT	TGGAGCCACAGCTAT	WSHSY	ATGTTCTGGTATCGACAAGACCTGGGACATGGGCTGAGGCTGATCTATTAC	MFWYRQDLGHGLRLIYY	TCAGCAGCTGCTGATATT	SAAADI
Pat726	KW11	GTTACAGCAATGGTCT	TCRbeta	tig00000003_GTTACAGCAATGGTCT	648	501	1	AAGGCTGGAGTCACTCAAACTCCAAGATATCTGATCAAAACGAGAGGACAGCAAGTGACACTGAGCTGCTCCCCTATCTCTGGGCATAGGAGTGTATCCTGGTACCAACAGACCCCAGGACAGGGCCTTCAGTTCCTCTTTGAATACTTCAGTGAGACACAGAGAAACAAAGGAAACTTCCCTGGTCGATTCTCAGGGCGCCAGTTCTCTAACTCTCGCTCTGAGATGAATGTGAGCACCTTGGAGCTGGGGGACTCGGCCCTTTATCTTTGCGCCAGCAGCTTGGAAGGCCAGGATTACGAGCAGTACTTCGGGCCGGGCACCAGGCTCACGGTCACAG	KAGVTQTPRYLIKTRGQQVTLSCSPISGHRSVSWYQQTPGQGLQFLFEYFSETQRNKGNFPGRFSGRQFSNSRSEMNVSTLELGDSALYLCASSLEGQDYEQYFGPGTRLTVT	TRB	F	T	F	T	F	T	TRBV5-1*01		TRBJ2-7*01	AAGGCTGGAGTCACTCAAACTCCAAGATATCTGATCAAAACGAGAGGACAGCAAGTGACACTGAGCTGCTCCCCTATCTCTGGGCATAGGAGTGTATCCTGGTACCAACAGACCCCAGGACAGGGCCTTCAGTTCCTCTTTGAATACTTCAGTGAGACACAGAGAAACAAAGGAAACTTCCCTGGTCGATTCTCAGGGCGCCAGTTCTCTAACTCTCGCTCTGAGATGAATGTGAGCACCTTGGAGCTGGGGGACTCGGCCCTTTATCTTTGCGCCAGCAGCTTGGAAGGCCAGGATTACGAGCAGTACTTCGGGCCGGGCACCAGGCTCACGGTCACAG	AAGGCTGGAGTCACTCAAACTCCAAGATATCTGATCAAAACGAGAGGACAGCAAGTGACACTGAGCTGCTCCCCTATCTCTGGGCATAGGAGTGTATCCTGGTACCAACAGACCCCAGGACAGGGCCTTCAGTTCCTCTTTGAATACTTCAGTGAGACACAGAGAAACAAAGGAAACTTCCCTGGTCGATTCTCAGGGCGCCAGTTCTCTAACTCTCGCTCTGAGATGAATGTGAGCACCTTGGAGCTGGGGGACTCGGCCCTTTATCTTTGCGCCAGCAGCTTGGNNNNNNNNNNNTACGAGCAGTACTTCGGGCCGGGCACCAGGCTCACGGTCACAG	KAGVTQTPRYLIKTRGQQVTLSCSPISGHRSVSWYQQTPGQGLQFLFEYFSETQRNKGNFPGRFSGRQFSNSRSEMNVSTLELGDSALYLCASSLEGQDYEQYFGPGTRLTVT	KAGVTQTPRYLIKTRGQQVTLSCSPISGHRSVSWYQQTPGQGLQFLFEYFSETQRNKGNFPGRFSGRQFSNSRSEMNVSTLELGDSALYLCASSLXXXXYEQYFGPGTRLTVT	1	286			298	340	AAGGCTGGAGTCACTCAAACTCCAAGATATCTGATCAAAACGAGAGGACAGCAAGTGACACTGAGCTGCTCCCCTATCTCTGGGCATAGGAGTGTATCCTGGTACCAACAGACCCCAGGACAGGGCCTTCAGTTCCTCTTTGAATACTTCAGTGAGACACAGAGAAACAAAGGAAACTTCCCTGGTCGATTCTCAGGGCGCCAGTTCTCTAACTCTCGCTCTGAGATGAATGTGAGCACCTTGGAGCTGGGGGACTCGGCCCTTTATCTTTGCGCCAGCAGCTTGG	KAGVTQTPRYLIKTRGQQVTLSCSPISGHRSVSWYQQTPGQGLQFLFEYFSETQRNKGNFPGRFSGRQFSNSRSEMNVSTLELGDSALYLCASSL	AAGGCTGGAGTCACTCAAACTCCAAGATATCTGATCAAAACGAGAGGACAGCAAGTGACACTGAGCTGCTCCCCTATCTCTGGGCATAGGAGTGTATCCTGGTACCAACAGACCCCAGGACAGGGCCTTCAGTTCCTCTTTGAATACTTCAGTGAGACACAGAGAAACAAAGGAAACTTCCCTGGTCGATTCTCAGGGCGCCAGTTCTCTAACTCTCGCTCTGAGATGAATGTGAGCACCTTGGAGCTGGGGGACTCGGCCCTTTATCTTTGCGCCAGCAGCTTGG	KAGVTQTPRYLIKTRGQQVTLSCSPISGHRSVSWYQQTPGQGLQFLFEYFSETQRNKGNFPGRFSGRQFSNSRSEMNVSTLELGDSALYLCASSL					TACGAGCAGTACTTCGGGCCGGGCACCAGGCTCACGGTCACAG	YEQYFGPGTRLTVT	TACGAGCAGTACTTCGGGCCGGGCACCAGGCTCACGGTCACAG	YEQYFGPGTRLTVT	AAGGCTGGAGTCACTCAAACTCCAAGATATCTGATCAAAACGAGAGGACAGCAAGTGACACTGAGCTGCTCCCCTATC	KAGVTQTPRYLIKTRGQQVTLSCSPI	TCTGGGCATAGGAGT	SGHRS	GTATCCTGGTACCAACAGACCCCAGGACAGGGCCTTCAGTTCCTCTTTGAA	VSWYQQTPGQGLQFLFE	TACTTCAGTGAGACACAG	YFSETQ
Pat726	KW11	GTTCATTGTATAATGG	TCRbeta	tig00000104_GTTCATTGTATAATGG	1133	65	1	GCTGCTGGAGTCATCCAGTCCCCAAGACATCTGATCAAAGAAAAGAGGGAAACAGCCACTCTGAAATGCTATCCTATCCCTAGACACGACACTGTCTACTGGTACCAGCAGGGTCCAGGTCAGGACCCCCAGTTCCTCATTTCGTTTTATGAAAAGATGCAGAGCGATAAAGGAAGCATCCCTGATCGATTCTCAGCTCAACAGTTCAGTGACTATCATTCTGAACTGAACATGAGCTCCTTGGAGCTGGGGGACTCAGCCCTGTACTTCTGTGCCAGCAGCTCAGAGGAAGCGGGGGAAGAGACCCAGTACTTCGGGCCAGGCACGCGGCTCCTGGTGCTCG	AAGVIQSPRHLIKEKRETATLKCYPIPRHDTVYWYQQGPGQDPQFLISFYEKMQSDKGSIPDRFSAQQFSDYHSELNMSSLELGDSALYFCASSSEEAGEETQYFGPGTRLLVL	TRB	F	T	F	T	F	T	TRBV13*01	TRBD2*01	TRBJ2-5*01	GCTGCTGGAGTCATCCAGTCCCCAAGACATCTGATCAAAGAAAAGAGGGAAACAGCCACTCTGAAATGCTATCCTATCCCTAGACACGACACTGTCTACTGGTACCAGCAGGGTCCAGGTCAGGACCCCCAGTTCCTCATTTCGTTTTATGAAAAGATGCAGAGCGATAAAGGAAGCATCCCTGATCGATTCTCAGCTCAACAGTTCAGTGACTATCATTCTGAACTGAACATGAGCTCCTTGGAGCTGGGGGACTCAGCCCTGTACTTCTGTGCCAGCAGCTCAGAGGAAGCGGGGGAAGAGACCCAGTACTTCGGGCCAGGCACGCGGCTCCTGGTGCTCG	GCTGCTGGAGTCATCCAGTCCCCAAGACATCTGATCAAAGAAAAGAGGGAAACAGCCACTCTGAAATGCTATCCTATCCCTAGACACGACACTGTCTACTGGTACCAGCAGGGTCCAGGTCAGGACCCCCAGTTCCTCATTTCGTTTTATGAAAAGATGCAGAGCGATAAAGGAAGCATCCCTGATCGATTCTCAGCTCAACAGTTCAGTGACTATCATTCTGAACTGAACATGAGCTCCTTGGAGCTGGGGGACTCAGCCCTGTACTTCTGTGCCAGCAGCTTAGNNNNAGCGGGGGAAGAGACCCAGTACTTCGGGCCAGGCACGCGGCTCCTGGTGCTCG	AAGVIQSPRHLIKEKRETATLKCYPIPRHDTVYWYQQGPGQDPQFLISFYEKMQSDKGSIPDRFSAQQFSDYHSELNMSSLELGDSALYFCASSSEEAGEETQYFGPGTRLLVL	AAGVIQSPRHLIKEKRETATLKCYPIPRHDTVYWYQQGPGQDPQFLISFYEKMQSDKGSIPDRFSAQQFSDYHSELNMSSLELGDSALYFCASSLXXAGEETQYFGPGTRLLVL	1	286	291	298	299	343	GCTGCTGGAGTCATCCAGTCCCCAAGACATCTGATCAAAGAAAAGAGGGAAACAGCCACTCTGAAATGCTATCCTATCCCTAGACACGACACTGTCTACTGGTACCAGCAGGGTCCAGGTCAGGACCCCCAGTTCCTCATTTCGTTTTATGAAAAGATGCAGAGCGATAAAGGAAGCATCCCTGATCGATTCTCAGCTCAACAGTTCAGTGACTATCATTCTGAACTGAACATGAGCTCCTTGGAGCTGGGGGACTCAGCCCTGTACTTCTGTGCCAGCAGCTCAG	AAGVIQSPRHLIKEKRETATLKCYPIPRHDTVYWYQQGPGQDPQFLISFYEKMQSDKGSIPDRFSAQQFSDYHSELNMSSLELGDSALYFCASSS	GCTGCTGGAGTCATCCAGTCCCCAAGACATCTGATCAAAGAAAAGAGGGAAACAGCCACTCTGAAATGCTATCCTATCCCTAGACACGACACTGTCTACTGGTACCAGCAGGGTCCAGGTCAGGACCCCCAGTTCCTCATTTCGTTTTATGAAAAGATGCAGAGCGATAAAGGAAGCATCCCTGATCGATTCTCAGCTCAACAGTTCAGTGACTATCATTCTGAACTGAACATGAGCTCCTTGGAGCTGGGGGACTCAGCCCTGTACTTCTGTGCCAGCAGCTTAG	AAGVIQSPRHLIKEKRETATLKCYPIPRHDTVYWYQQGPGQDPQFLISFYEKMQSDKGSIPDRFSAQQFSDYHSELNMSSLELGDSALYFCASSL	AGCGGGGG	AG	AGCGGGGG	AG	AAGAGACCCAGTACTTCGGGCCAGGCACGCGGCTCCTGGTGCTCG	ETQYFGPGTRLLVL	AAGAGACCCAGTACTTCGGGCCAGGCACGCGGCTCCTGGTGCTCG	ETQYFGPGTRLLVL	GCTGCTGGAGTCATCCAGTCCCCAAGACATCTGATCAAAGAAAAGAGGGAAACAGCCACTCTGAAATGCTATCCTATC	AAGVIQSPRHLIKEKRETATLKCYPI	CCTAGACACGACACT	PRHDT	GTCTACTGGTACCAGCAGGGTCCAGGTCAGGACCCCCAGTTCCTCATTTCG	VYWYQQGPGQDPQFLIS	TTTTATGAAAAGATGCAG	FYEKMQ
Pat726	IW9	TAAGAGAAGATCCTGT	TCRbeta	tig00000002_TAAGAGAAGATCCTGT	637	497	1	GACACAGCTGTTTCCCAGACTCCAAAATACCTGGTCACACAGATGGGAAACGACAAGTCCATTAAATGTGAACAAAATCTGGGCCATGATACTATGTATTGGTATAAACAGGACTCTAAGAAATTTCTGAAGATAATGTTTAGCTACAATAATAAGGAGCTCATTATAAATGAAACAGTTCCAAATCGCTTCTCACCTAAATCTCCAGACAAAGCTCACTTAAATCTTCACATCAATTCCCTGGAGCTTGGTGACTCTGCTGTGTATTTCTGTGCCAGCAGCCAAGACGAGTGGGTGAACACTGAAGCTTTCTTTGGACAAGGCACCAGACTCACAGTTGTAG	DTAVSQTPKYLVTQMGNDKSIKCEQNLGHDTMYWYKQDSKKFLKIMFSYNNKELIINETVPNRFSPKSPDKAHLNLHINSLELGDSAVYFCASSQDEWVNTEAFFGQGTRLTVV	TRB	F	T	F	T	F	T	TRBV3-1*01		TRBJ1-1*01	GACACAGCTGTTTCCCAGACTCCAAAATACCTGGTCACACAGATGGGAAACGACAAGTCCATTAAATGTGAACAAAATCTGGGCCATGATACTATGTATTGGTATAAACAGGACTCTAAGAAATTTCTGAAGATAATGTTTAGCTACAATAATAAGGAGCTCATTATAAATGAAACAGTTCCAAATCGCTTCTCACCTAAATCTCCAGACAAAGCTCACTTAAATCTTCACATCAATTCCCTGGAGCTTGGTGACTCTGCTGTGTATTTCTGTGCCAGCAGCCAAGACGAGTGGGTGAACACTGAAGCTTTCTTTGGACAAGGCACCAGACTCACAGTTGTAG	GACACAGCTGTTTCCCAGACTCCAAAATACCTGGTCACACAGATGGGAAACGACAAGTCCATTAAATGTGAACAAAATCTGGGCCATGATACTATGTATTGGTATAAACAGGACTCTAAGAAATTTCTGAAGATAATGTTTAGCTACAATAATAAGGAGCTCATTATAAATGAAACAGTTCCAAATCGCTTCTCACCTAAATCTCCAGACAAAGCTCACTTAAATCTTCACATCAATTCCCTGGAGCTTGGTGACTCTGCTGTGTATTTCTGTGCCAGCAGCCAAGANNNNNNNNTGAACACTGAAGCTTTCTTTGGACAAGGCACCAGACTCACAGTTGTAG	DTAVSQTPKYLVTQMGNDKSIKCEQNLGHDTMYWYKQDSKKFLKIMFSYNNKELIINETVPNRFSPKSPDKAHLNLHINSLELGDSAVYFCASSQDEWVNTEAFFGQGTRLTVV	DTAVSQTPKYLVTQMGNDKSIKCEQNLGHDTMYWYKQDSKKFLKIMFSYNNKELIINETVPNRFSPKSPDKAHLNLHINSLELGDSAVYFCASSQXXXXNTEAFFGQGTRLTVV	1	287			296	343	GACACAGCTGTTTCCCAGACTCCAAAATACCTGGTCACACAGATGGGAAACGACAAGTCCATTAAATGTGAACAAAATCTGGGCCATGATACTATGTATTGGTATAAACAGGACTCTAAGAAATTTCTGAAGATAATGTTTAGCTACAATAATAAGGAGCTCATTATAAATGAAACAGTTCCAAATCGCTTCTCACCTAAATCTCCAGACAAAGCTCACTTAAATCTTCACATCAATTCCCTGGAGCTTGGTGACTCTGCTGTGTATTTCTGTGCCAGCAGCCAAGA	DTAVSQTPKYLVTQMGNDKSIKCEQNLGHDTMYWYKQDSKKFLKIMFSYNNKELIINETVPNRFSPKSPDKAHLNLHINSLELGDSAVYFCASSQ	GACACAGCTGTTTCCCAGACTCCAAAATACCTGGTCACACAGATGGGAAACGACAAGTCCATTAAATGTGAACAAAATCTGGGCCATGATACTATGTATTGGTATAAACAGGACTCTAAGAAATTTCTGAAGATAATGTTTAGCTACAATAATAAGGAGCTCATTATAAATGAAACAGTTCCAAATCGCTTCTCACCTAAATCTCCAGACAAAGCTCACTTAAATCTTCACATCAATTCCCTGGAGCTTGGTGACTCTGCTGTGTATTTCTGTGCCAGCAGCCAAGA	DTAVSQTPKYLVTQMGNDKSIKCEQNLGHDTMYWYKQDSKKFLKIMFSYNNKELIINETVPNRFSPKSPDKAHLNLHINSLELGDSAVYFCASSQ					TGAACACTGAAGCTTTCTTTGGACAAGGCACCAGACTCACAGTTGTAG	NTEAFFGQGTRLTVV	TGAACACTGAAGCTTTCTTTGGACAAGGCACCAGACTCACAGTTGTAG	NTEAFFGQGTRLTVV	GACACAGCTGTTTCCCAGACTCCAAAATACCTGGTCACACAGATGGGAAACGACAAGTCCATTAAATGTGAACAAAAT	DTAVSQTPKYLVTQMGNDKSIKCEQN	CTGGGCCATGATACT	LGHDT	ATGTATTGGTATAAACAGGACTCTAAGAAATTTCTGAAGATAATGTTTAGC	MYWYKQDSKKFLKIMFS	TACAATAATAAGGAGCTC	YNNKEL
Pat726	IW9	TAGGCATCATGAACCT	TCRbeta	tig00000232_TAGGCATCATGAACCT	543	82	1	GGTGCTGGAGTCTCCCAGTCCCCTAGGTACAAAGTCGCAAAGAGAGGACAGGATGTAGCTCTCAGGTGTGATCCAATTTCGGGTCATGTATCCCTTTTTTGGTACCAACAGGCCCTGGGGCAGGGGCCAGAGTTTCTGACTTATTTCCAGAATGAAGCTCAACTAGACAAATCGGGGCTGCCCAGTGATCGCTTCTTTGCAGAAAGGCCTGAGGGATCCGTCTCCACTCTGAAGATCCAGCGCACACAGCAGGAGGACTCCGCCGTGTATCTCTGTGCCAGCAGTCAGGAGGGGACAGGGGGGGAAAAACTGTTTTTTGGCAGTGGAACCCAGCTCTCTGTCTTGG	GAGVSQSPRYKVAKRGQDVALRCDPISGHVSLFWYQQALGQGPEFLTYFQNEAQLDKSGLPSDRFFAERPEGSVSTLKIQRTQQEDSAVYLCASSQEGTGGEKLFFGSGTQLSVL	TRB	F	T	F	T	F	T	TRBV7-8*01	TRBD1*01	TRBJ1-4*01	GGTGCTGGAGTCTCCCAGTCCCCTAGGTACAAAGTCGCAAAGAGAGGACAGGATGTAGCTCTCAGGTGTGATCCAATTTCGGGTCATGTATCCCTTTTTTGGTACCAACAGGCCCTGGGGCAGGGGCCAGAGTTTCTGACTTATTTCCAGAATGAAGCTCAACTAGACAAATCGGGGCTGCCCAGTGATCGCTTCTTTGCAGAAAGGCCTGAGGGATCCGTCTCCACTCTGAAGATCCAGCGCACACAGCAGGAGGACTCCGCCGTGTATCTCTGTGCCAGCAGTCAGGAGGGGACAGGGGGGGAAAAACTGTTTTTTGGCAGTGGAACCCAGCTCTCTGTCTTGG	GGTGCTGGAGTCTCCCAGTCCCCTAGGTACAAAGTCGCAAAGAGAGGACAGGATGTAGCTCTCAGGTGTGATCCAATTTCGGGTCATGTATCCCTTTTTTGGTACCAACAGGCCCTGGGGCAGGGGCCAGAGTTTCTGACTTATTTCCAGAATGAAGCTCAACTAGACAAATCGGGGCTGCCCAGTGATCGCTTCTTTGCAGAAAGGCCTGAGGGATCCGTCTCCACTCTGAAGATCCAGCGCACACAGCAGGAGGACTCCGCCGTGTATCTCTGTGCCAGCAGNNNNNNNGGGACAGGGGGNGAAAAACTGTTTTTTGGCAGTGGAACCCAGCTCTCTGTCTTGG	GAGVSQSPRYKVAKRGQDVALRCDPISGHVSLFWYQQALGQGPEFLTYFQNEAQLDKSGLPSDRFFAERPEGSVSTLKIQRTQQEDSAVYLCASSQEGTGGEKLFFGSGTQLSVL	GAGVSQSPRYKVAKRGQDVALRCDPISGHVSLFWYQQALGQGPEFLTYFQNEAQLDKSGLPSDRFFAERPEGSVSTLKIQRTQQEDSAVYLCASXXXGTGGEKLFFGSGTQLSVL	1	284	292	302	304	346	GGTGCTGGAGTCTCCCAGTCCCCTAGGTACAAAGTCGCAAAGAGAGGACAGGATGTAGCTCTCAGGTGTGATCCAATTTCGGGTCATGTATCCCTTTTTTGGTACCAACAGGCCCTGGGGCAGGGGCCAGAGTTTCTGACTTATTTCCAGAATGAAGCTCAACTAGACAAATCGGGGCTGCCCAGTGATCGCTTCTTTGCAGAAAGGCCTGAGGGATCCGTCTCCACTCTGAAGATCCAGCGCACACAGCAGGAGGACTCCGCCGTGTATCTCTGTGCCAGCAG	GAGVSQSPRYKVAKRGQDVALRCDPISGHVSLFWYQQALGQGPEFLTYFQNEAQLDKSGLPSDRFFAERPEGSVSTLKIQRTQQEDSAVYLCAS	GGTGCTGGAGTCTCCCAGTCCCCTAGGTACAAAGTCGCAAAGAGAGGACAGGATGTAGCTCTCAGGTGTGATCCAATTTCGGGTCATGTATCCCTTTTTTGGTACCAACAGGCCCTGGGGCAGGGGCCAGAGTTTCTGACTTATTTCCAGAATGAAGCTCAACTAGACAAATCGGGGCTGCCCAGTGATCGCTTCTTTGCAGAAAGGCCTGAGGGATCCGTCTCCACTCTGAAGATCCAGCGCACACAGCAGGAGGACTCCGCCGTGTATCTCTGTGCCAGCAG	GAGVSQSPRYKVAKRGQDVALRCDPISGHVSLFWYQQALGQGPEFLTYFQNEAQLDKSGLPSDRFFAERPEGSVSTLKIQRTQQEDSAVYLCAS	GGGACAGGGGG	GTGG	GGGACAGGGGG	GTGG	GAAAAACTGTTTTTTGGCAGTGGAACCCAGCTCTCTGTCTTGG	EKLFFGSGTQLSVL	GAAAAACTGTTTTTTGGCAGTGGAACCCAGCTCTCTGTCTTGG	EKLFFGSGTQLSVL	GGTGCTGGAGTCTCCCAGTCCCCTAGGTACAAAGTCGCAAAGAGAGGACAGGATGTAGCTCTCAGGTGTGATCCAATT	GAGVSQSPRYKVAKRGQDVALRCDPI	TCGGGTCATGTATCC	SGHVS	CTTTTTTGGTACCAACAGGCCCTGGGGCAGGGGCCAGAGTTTCTGACTTAT	LFWYQQALGQGPEFLTY	TTCCAGAATGAAGCTCAA	FQNEAQ
Pat726	KW11	TATCAGGTCTCAACTT	TCRbeta	tig00000002_TATCAGGTCTCAACTT	1049	257	1	GGTGCTGGAGTCTCCCAGTCTCCCAGGTACAAAGTCACAAAGAGGGGACAGGATGTAGCTCTCAGGTGTGATCCAATTTCGGGTCATGTATCCCTTTATTGGTACCGACAGGCCCTGGGGCAGGGCCCAGAGTTTCTGACTTACTTCAATTATGAAGCCCAACAAGACAAATCAGGGCTGCCCAATGATCGGTTCTCTGCAGAGAGGCCTGAGGGATCCATCTCCACTCTGACGATCCAGCGCACAGAGCAGCGGGACTCGGCCATGTATCGCTGTGCCAGCAGTCGACAGGGGGCTAGCACTGAAGCTTTCTTTGGACAAGGCACCAGACTCACAGTTGTAG	GAGVSQSPRYKVTKRGQDVALRCDPISGHVSLYWYRQALGQGPEFLTYFNYEAQQDKSGLPNDRFSAERPEGSISTLTIQRTEQRDSAMYRCASSRQGASTEAFFGQGTRLTVV	TRB	F	T	F	T	F	T	TRBV7-6*01	TRBD1*01	TRBJ1-1*01	GGTGCTGGAGTCTCCCAGTCTCCCAGGTACAAAGTCACAAAGAGGGGACAGGATGTAGCTCTCAGGTGTGATCCAATTTCGGGTCATGTATCCCTTTATTGGTACCGACAGGCCCTGGGGCAGGGCCCAGAGTTTCTGACTTACTTCAATTATGAAGCCCAACAAGACAAATCAGGGCTGCCCAATGATCGGTTCTCTGCAGAGAGGCCTGAGGGATCCATCTCCACTCTGACGATCCAGCGCACAGAGCAGCGGGACTCGGCCATGTATCGCTGTGCCAGCAGTCGACAGGGGGCTAGCACTGAAGCTTTCTTTGGACAAGGCACCAGACTCACAGTTGTAG	GGTGCTGGAGTCTCCCAGTCTCCCAGGTACAAAGTCACAAAGAGGGGACAGGATGTAGCTCTCAGGTGTGATCCAATTTCGGGTCATGTATCCCTTTATTGGTACCGACAGGCCCTGGGGCAGGGCCCAGAGTTTCTGACTTACTTCAATTATGAAGCCCAACAAGACAAATCAGGGCTGCCCAATGATCGGTTCTCTGCAGAGAGGCCTGAGGGATCCATCTCCACTCTGACGATCCAGCGCACAGAGCAGCGGGACTCGGCCATGTATCGCTGTGCCAGCAGNNGACAGGGGGCNNNCACTGAAGCTTTCTTTGGACAAGGCACCAGACTCACAGTTGTAG	GAGVSQSPRYKVTKRGQDVALRCDPISGHVSLYWYRQALGQGPEFLTYFNYEAQQDKSGLPNDRFSAERPEGSISTLTIQRTEQRDSAMYRCASSRQGASTEAFFGQGTRLTVV	GAGVSQSPRYKVTKRGQDVALRCDPISGHVSLYWYRQALGQGPEFLTYFNYEAQQDKSGLPNDRFSAERPEGSISTLTIQRTEQRDSAMYRCASXXQGAXTEAFFGQGTRLTVV	1	284	287	296	300	343	GGTGCTGGAGTCTCCCAGTCTCCCAGGTACAAAGTCACAAAGAGGGGACAGGATGTAGCTCTCAGGTGTGATCCAATTTCGGGTCATGTATCCCTTTATTGGTACCGACAGGCCCTGGGGCAGGGCCCAGAGTTTCTGACTTACTTCAATTATGAAGCCCAACAAGACAAATCAGGGCTGCCCAATGATCGGTTCTCTGCAGAGAGGCCTGAGGGATCCATCTCCACTCTGACGATCCAGCGCACAGAGCAGCGGGACTCGGCCATGTATCGCTGTGCCAGCAG	GAGVSQSPRYKVTKRGQDVALRCDPISGHVSLYWYRQALGQGPEFLTYFNYEAQQDKSGLPNDRFSAERPEGSISTLTIQRTEQRDSAMYRCAS	GGTGCTGGAGTCTCCCAGTCTCCCAGGTACAAAGTCACAAAGAGGGGACAGGATGTAGCTCTCAGGTGTGATCCAATTTCGGGTCATGTATCCCTTTATTGGTACCGACAGGCCCTGGGGCAGGGCCCAGAGTTTCTGACTTACTTCAATTATGAAGCCCAACAAGACAAATCAGGGCTGCCCAATGATCGGTTCTCTGCAGAGAGGCCTGAGGGATCCATCTCCACTCTGACGATCCAGCGCACAGAGCAGCGGGACTCGGCCATGTATCGCTGTGCCAGCAG	GAGVSQSPRYKVTKRGQDVALRCDPISGHVSLYWYRQALGQGPEFLTYFNYEAQQDKSGLPNDRFSAERPEGSISTLTIQRTEQRDSAMYRCAS	GACAGGGGGC	QGA	GACAGGGGGC	QGA	CACTGAAGCTTTCTTTGGACAAGGCACCAGACTCACAGTTGTAG	TEAFFGQGTRLTVV	CACTGAAGCTTTCTTTGGACAAGGCACCAGACTCACAGTTGTAG	TEAFFGQGTRLTVV	GGTGCTGGAGTCTCCCAGTCTCCCAGGTACAAAGTCACAAAGAGGGGACAGGATGTAGCTCTCAGGTGTGATCCAATT	GAGVSQSPRYKVTKRGQDVALRCDPI	TCGGGTCATGTATCC	SGHVS	CTTTATTGGTACCGACAGGCCCTGGGGCAGGGCCCAGAGTTTCTGACTTAC	LYWYRQALGQGPEFLTY	TTCAATTATGAAGCCCAA	FNYEAQ
Pat726	KW11	TATTACCCAATCCGAT	TCRbeta	tig00000001_TATTACCCAATCCGAT	1099	333	1	GCTGCTGGAGTCATCCAGTCCCCAAGACATCTGATCAAAGAAAAGAGGGAAACAGCCACTCTGAAATGCTATCCTATCCCTAGACACGACACTGTCTACTGGTACCAGCAGGGTCCAGGTCAGGACCCCCAGTTCCTCATTTCGTTTTATGAAAAGATGCAGAGCGATAAAGGAAGCATCCCTGATCGATTCTCAGCTCAACAGTTCAGTGACTATCATTCTGAACTGAACATGAGCTCCTTGGAGCTGGGGGACTCAGCCCTGTACTTCTGTGCCAGCAGCTGGACGTCGGGGGGTGGGTCGAATCAGCCCCAGCATTTTGGTGATGGGACTCGACTCTCCATCCTAG	AAGVIQSPRHLIKEKRETATLKCYPIPRHDTVYWYQQGPGQDPQFLISFYEKMQSDKGSIPDRFSAQQFSDYHSELNMSSLELGDSALYFCASSWTSGGGSNQPQHFGDGTRLSIL	TRB	F	T	F	T	F	T	TRBV13*01	TRBD2*01	TRBJ1-5*01	GCTGCTGGAGTCATCCAGTCCCCAAGACATCTGATCAAAGAAAAGAGGGAAACAGCCACTCTGAAATGCTATCCTATCCCTAGACACGACACTGTCTACTGGTACCAGCAGGGTCCAGGTCAGGACCCCCAGTTCCTCATTTCGTTTTATGAAAAGATGCAGAGCGATAAAGGAAGCATCCCTGATCGATTCTCAGCTCAACAGTTCAGTGACTATCATTCTGAACTGAACATGAGCTCCTTGGAGCTGGGGGACTCAGCCCTGTACTTCTGTGCCAGCAGCTGGACGTCGGGGGGTGGGTCGAATCAGCCCCAGCATTTTGGTGATGGGACTCGACTCTCCATCCTAG	GCTGCTGGAGTCATCCAGTCCCCAAGACATCTGATCAAAGAAAAGAGGGAAACAGCCACTCTGAAATGCTATCCTATCCCTAGACACGACACTGTCTACTGGTACCAGCAGGGTCCAGGTCAGGACCCCCAGTTCCTCATTTCGTTTTATGAAAAGATGCAGAGCGATAAAGGAAGCATCCCTGATCGATTCTCAGCTCAACAGTTCAGTGACTATCATTCTGAACTGAACATGAGCTCCTTGGAGCTGGGGGACTCAGCCCTGTACTTCTGTGCCAGCAGCTNNNNNNCGGGGGGNNNNNNNAATCAGCCCCAGCATTTTGGTGATGGGACTCGACTCTCCATCCTAG	AAGVIQSPRHLIKEKRETATLKCYPIPRHDTVYWYQQGPGQDPQFLISFYEKMQSDKGSIPDRFSAQQFSDYHSELNMSSLELGDSALYFCASSWTSGGGSNQPQHFGDGTRLSIL	AAGVIQSPRHLIKEKRETATLKCYPIPRHDTVYWYQQGPGQDPQFLISFYEKMQSDKGSIPDRFSAQQFSDYHSELNMSSLELGDSALYFCASSXXXGGXXNQPQHFGDGTRLSIL	1	283	290	296	304	349	GCTGCTGGAGTCATCCAGTCCCCAAGACATCTGATCAAAGAAAAGAGGGAAACAGCCACTCTGAAATGCTATCCTATCCCTAGACACGACACTGTCTACTGGTACCAGCAGGGTCCAGGTCAGGACCCCCAGTTCCTCATTTCGTTTTATGAAAAGATGCAGAGCGATAAAGGAAGCATCCCTGATCGATTCTCAGCTCAACAGTTCAGTGACTATCATTCTGAACTGAACATGAGCTCCTTGGAGCTGGGGGACTCAGCCCTGTACTTCTGTGCCAGCAGCT	AAGVIQSPRHLIKEKRETATLKCYPIPRHDTVYWYQQGPGQDPQFLISFYEKMQSDKGSIPDRFSAQQFSDYHSELNMSSLELGDSALYFCASS	GCTGCTGGAGTCATCCAGTCCCCAAGACATCTGATCAAAGAAAAGAGGGAAACAGCCACTCTGAAATGCTATCCTATCCCTAGACACGACACTGTCTACTGGTACCAGCAGGGTCCAGGTCAGGACCCCCAGTTCCTCATTTCGTTTTATGAAAAGATGCAGAGCGATAAAGGAAGCATCCCTGATCGATTCTCAGCTCAACAGTTCAGTGACTATCATTCTGAACTGAACATGAGCTCCTTGGAGCTGGGGGACTCAGCCCTGTACTTCTGTGCCAGCAGCT	AAGVIQSPRHLIKEKRETATLKCYPIPRHDTVYWYQQGPGQDPQFLISFYEKMQSDKGSIPDRFSAQQFSDYHSELNMSSLELGDSALYFCASS	CGGGGGG	GG	CGGGGGG	GG	AATCAGCCCCAGCATTTTGGTGATGGGACTCGACTCTCCATCCTAG	NQPQHFGDGTRLSIL	AATCAGCCCCAGCATTTTGGTGATGGGACTCGACTCTCCATCCTAG	NQPQHFGDGTRLSIL	GCTGCTGGAGTCATCCAGTCCCCAAGACATCTGATCAAAGAAAAGAGGGAAACAGCCACTCTGAAATGCTATCCTATC	AAGVIQSPRHLIKEKRETATLKCYPI	CCTAGACACGACACT	PRHDT	GTCTACTGGTACCAGCAGGGTCCAGGTCAGGACCCCCAGTTCCTCATTTCG	VYWYQQGPGQDPQFLIS	TTTTATGAAAAGATGCAG	FYEKMQ
Pat726	TW10	TCACGAATCCCTTGCA	TCRbeta	tig00000005_TCACGAATCCCTTGCA	885	470	1	GATTCTGGAGTCACACAAACCCCAAAGCACCTGATCACAGCAACTGGACAGCGAGTGACGCTGAGATGCTCCCCTAGGTCTGGAGACCTCTCTGTGTACTGGTACCAACAGAGCCTGGACCAGGGCCTCCAGTTCCTCATTCACTATTATAATGGAGAAGAGAGAGCAAAAGGAAACATTCTTGAACGATTCTCCGCACAACAGTTCCCTGACTTGCACTCTGAACTAAACCTGAGCTCTCTGGAGCTGGGGGACTCAGCTTTGTATTTCTGTGCCAGCAGCTCCAATCAGGGGGCGAACACCGGGGAGCTGTTTTTTGGAGAAGGCTCTAGGCTGACCGTACTGG	DSGVTQTPKHLITATGQRVTLRCSPRSGDLSVYWYQQSLDQGLQFLIHYYNGEERAKGNILERFSAQQFPDLHSELNLSSLELGDSALYFCASSSNQGANTGELFFGEGSRLTVL	TRB	F	T	F	T	F	T	TRBV9*02	TRBD1*01	TRBJ2-2*01	GATTCTGGAGTCACACAAACCCCAAAGCACCTGATCACAGCAACTGGACAGCGAGTGACGCTGAGATGCTCCCCTAGGTCTGGAGACCTCTCTGTGTACTGGTACCAACAGAGCCTGGACCAGGGCCTCCAGTTCCTCATTCACTATTATAATGGAGAAGAGAGAGCAAAAGGAAACATTCTTGAACGATTCTCCGCACAACAGTTCCCTGACTTGCACTCTGAACTAAACCTGAGCTCTCTGGAGCTGGGGGACTCAGCTTTGTATTTCTGTGCCAGCAGCTCCAATCAGGGGGCGAACACCGGGGAGCTGTTTTTTGGAGAAGGCTCTAGGCTGACCGTACTGG	GATTCTGGAGTCACACAAACCCCAAAGCACCTGATCACAGCAACTGGACAGCGAGTGACGCTGAGATGCTCCCCTAGGTCTGGAGACCTCTCTGTGTACTGGTACCAACAGAGCCTGGACCAGGGCCTCCAGTTCCTCATTCACTATTATAATGGAGAAGAGAGAGCAAAAGGAAACATTCTTGAACGATTCTCCGCACAACAGTTCCCTGACTTGCACTCTGAACTAAACCTGAGCTCTCTGGAGCTGGGGGACTCAGCTTTGTATTTCTGTGCCAGCAGCNNNNNNCAGGGGGCGAACACCGGGGAGCTGTTTTTTGGAGAAGGCTCTAGGCTGACCGTACTGG	DSGVTQTPKHLITATGQRVTLRCSPRSGDLSVYWYQQSLDQGLQFLIHYYNGEERAKGNILERFSAQQFPDLHSELNLSSLELGDSALYFCASSSNQGANTGELFFGEGSRLTVL	DSGVTQTPKHLITATGQRVTLRCSPRSGDLSVYWYQQSLDQGLQFLIHYYNGEERAKGNILERFSAQQFPDLHSELNLSSLELGDSALYFCASSXXQGANTGELFFGEGSRLTVL	1	282	289	295	296	346	GATTCTGGAGTCACACAAACCCCAAAGCACCTGATCACAGCAACTGGACAGCGAGTGACGCTGAGATGCTCCCCTAGGTCTGGAGACCTCTCTGTGTACTGGTACCAACAGAGCCTGGACCAGGGCCTCCAGTTCCTCATTCACTATTATAATGGAGAAGAGAGAGCAAAAGGAAACATTCTTGAACGATTCTCCGCACAACAGTTCCCTGACTTGCACTCTGAACTAAACCTGAGCTCTCTGGAGCTGGGGGACTCAGCTTTGTATTTCTGTGCCAGCAGC	DSGVTQTPKHLITATGQRVTLRCSPRSGDLSVYWYQQSLDQGLQFLIHYYNGEERAKGNILERFSAQQFPDLHSELNLSSLELGDSALYFCASS	GATTCTGGAGTCACACAAACCCCAAAGCACCTGATCACAGCAACTGGACAGCGAGTGACGCTGAGATGCTCCCCTAGGTCTGGAGACCTCTCTGTGTACTGGTACCAACAGAGCCTGGACCAGGGCCTCCAGTTCCTCATTCACTATTATAATGGAGAAGAGAGAGCAAAAGGAAACATTCTTGAACGATTCTCCGCACAACAGTTCCCTGACTTGCACTCTGAACTAAACCTGAGCTCTCTGGAGCTGGGGGACTCAGCTTTGTATTTCTGTGCCAGCAGC	DSGVTQTPKHLITATGQRVTLRCSPRSGDLSVYWYQQSLDQGLQFLIHYYNGEERAKGNILERFSAQQFPDLHSELNLSSLELGDSALYFCASS	CAGGGGG	QG	CAGGGGG	QG	CGAACACCGGGGAGCTGTTTTTTGGAGAAGGCTCTAGGCTGACCGTACTGG	NTGELFFGEGSRLTVL	CGAACACCGGGGAGCTGTTTTTTGGAGAAGGCTCTAGGCTGACCGTACTGG	NTGELFFGEGSRLTVL	GATTCTGGAGTCACACAAACCCCAAAGCACCTGATCACAGCAACTGGACAGCGAGTGACGCTGAGATGCTCCCCTAGG	DSGVTQTPKHLITATGQRVTLRCSPR	TCTGGAGACCTCTCT	SGDLS	GTGTACTGGTACCAACAGAGCCTGGACCAGGGCCTCCAGTTCCTCATTCAC	VYWYQQSLDQGLQFLIH	TATTATAATGGAGAAGAG	YYNGEE
Pat726	IW9	TCATTTGGTGAGGGAG	TCRbeta	tig00000002_TCATTTGGTGAGGGAG	992	392	1	AATGCTGGTGTCACTCAGACCCCAAAATTCCAGGTCCTGAAGACAGGACAGAGCATGACACTGCAGTGTGCCCAGGATATGAACCATAACTCCATGTACTGGTATCGACAAGACCCAGGCATGGGACTGAGGCTGATTTATTACTCAGCTTCTGAGGGTACCACTGACAAAGGAGAAGTCCCCAATGGCTACAATGTCTCCAGATTAAACAAACGGGAGTTCTCGCTCAGGCTGGAGTCGGCTGCTCCCTCCCAGACATCTGTGTACTTCTGTGCCAGCTGGAGATGGGGGACAGATACGCAGTATTTTGGCCCAGGCACCCGGCTGACAGTGCTCG	NAGVTQTPKFQVLKTGQSMTLQCAQDMNHNSMYWYRQDPGMGLRLIYYSASEGTTDKGEVPNGYNVSRLNKREFSLRLESAAPSQTSVYFCASWRWGTDTQYFGPGTRLTVL	TRB	F	T	F	T	F	T	TRBV6-1*01	TRBD1*01	TRBJ2-3*01	AATGCTGGTGTCACTCAGACCCCAAAATTCCAGGTCCTGAAGACAGGACAGAGCATGACACTGCAGTGTGCCCAGGATATGAACCATAACTCCATGTACTGGTATCGACAAGACCCAGGCATGGGACTGAGGCTGATTTATTACTCAGCTTCTGAGGGTACCACTGACAAAGGAGAAGTCCCCAATGGCTACAATGTCTCCAGATTAAACAAACGGGAGTTCTCGCTCAGGCTGGAGTCGGCTGCTCCCTCCCAGACATCTGTGTACTTCTGTGCCAGCTGGAGATGGGGGACAGATACGCAGTATTTTGGCCCAGGCACCCGGCTGACAGTGCTCG	AATGCTGGTGTCACTCAGACCCCAAAATTCCAGGTCCTGAAGACAGGACAGAGCATGACACTGCAGTGTGCCCAGGATATGAACCATAACTCCATGTACTGGTATCGACAAGACCCAGGCATGGGACTGAGGCTGATTTATTACTCAGCTTCTGAGGGTACCACTGACAAAGGAGAAGTCCCCAATGGCTACAATGTCTCCAGATTAAACAAACGGGAGTTCTCGCTCAGGCTGGAGTCGGCTGCTCCCTCCCAGACATCTGTGTACTTCTGTGCCAGCNNNNNNNGGGGGACAGATACGCAGTATTTTGGCCCAGGCACCCGGCTGACAGTGCTCG	NAGVTQTPKFQVLKTGQSMTLQCAQDMNHNSMYWYRQDPGMGLRLIYYSASEGTTDKGEVPNGYNVSRLNKREFSLRLESAAPSQTSVYFCASWRWGTDTQYFGPGTRLTVL	NAGVTQTPKFQVLKTGQSMTLQCAQDMNHNSMYWYRQDPGMGLRLIYYSASEGTTDKGEVPNGYNVSRLNKREFSLRLESAAPSQTSVYFCASXXXGTDTQYFGPGTRLTVL	1	279	287	291	292	337	AATGCTGGTGTCACTCAGACCCCAAAATTCCAGGTCCTGAAGACAGGACAGAGCATGACACTGCAGTGTGCCCAGGATATGAACCATAACTCCATGTACTGGTATCGACAAGACCCAGGCATGGGACTGAGGCTGATTTATTACTCAGCTTCTGAGGGTACCACTGACAAAGGAGAAGTCCCCAATGGCTACAATGTCTCCAGATTAAACAAACGGGAGTTCTCGCTCAGGCTGGAGTCGGCTGCTCCCTCCCAGACATCTGTGTACTTCTGTGCCAGC	NAGVTQTPKFQVLKTGQSMTLQCAQDMNHNSMYWYRQDPGMGLRLIYYSASEGTTDKGEVPNGYNVSRLNKREFSLRLESAAPSQTSVYFCAS	AATGCTGGTGTCACTCAGACCCCAAAATTCCAGGTCCTGAAGACAGGACAGAGCATGACACTGCAGTGTGCCCAGGATATGAACCATAACTCCATGTACTGGTATCGACAAGACCCAGGCATGGGACTGAGGCTGATTTATTACTCAGCTTCTGAGGGTACCACTGACAAAGGAGAAGTCCCCAATGGCTACAATGTCTCCAGATTAAACAAACGGGAGTTCTCGCTCAGGCTGGAGTCGGCTGCTCCCTCCCAGACATCTGTGTACTTCTGTGCCAGC	NAGVTQTPKFQVLKTGQSMTLQCAQDMNHNSMYWYRQDPGMGLRLIYYSASEGTTDKGEVPNGYNVSRLNKREFSLRLESAAPSQTSVYFCAS	GGGGG	G	GGGGG	G	ACAGATACGCAGTATTTTGGCCCAGGCACCCGGCTGACAGTGCTCG	TDTQYFGPGTRLTVL	ACAGATACGCAGTATTTTGGCCCAGGCACCCGGCTGACAGTGCTCG	TDTQYFGPGTRLTVL	AATGCTGGTGTCACTCAGACCCCAAAATTCCAGGTCCTGAAGACAGGACAGAGCATGACACTGCAGTGTGCCCAGGAT	NAGVTQTPKFQVLKTGQSMTLQCAQD	ATGAACCATAACTCC	MNHNS	ATGTACTGGTATCGACAAGACCCAGGCATGGGACTGAGGCTGATTTATTAC	MYWYRQDPGMGLRLIYY	TCAGCTTCTGAGGGTACC	SASEGT
Pat726	IW9	TCGCGTTTCCTCATTA	TCRbeta	tig00000312_TCGCGTTTCCTCATTA	799	142	1	GATTCTGGAGTCACACAAACCCCAAAGCACCTGATCACAGCAACTGGACAGCGAGTGACGCTGAGATGCTCCCCTAGGTCTGGAGACCTCTCTGTGTACTGGTACCAACAGAGCCTGGACCAGGGCCTCCAGTTCCTCATTCACTATTATAATGGAGAAGAGAGAGCAAAAGGAAACATTCTTGAACGATTCTCCGCACAACAGTTCCCTGACTTGCACTCTGAACTAAACCTGAGCTCTCTGGAGCTGGGGGACTCAGCTTTGTATTTCTGTGCCAGCAGCGGACAGGGACAGGGGGGTTATGGCTACACCTTCGGTTCGGGGACCAGGTTAACCGTTGTAG	DSGVTQTPKHLITATGQRVTLRCSPRSGDLSVYWYQQSLDQGLQFLIHYYNGEERAKGNILERFSAQQFPDLHSELNLSSLELGDSALYFCASSGQGQGGYGYTFGSGTRLTVV	TRB	F	T	F	T	F	T	TRBV9*02	TRBD1*01	TRBJ1-2*01	GATTCTGGAGTCACACAAACCCCAAAGCACCTGATCACAGCAACTGGACAGCGAGTGACGCTGAGATGCTCCCCTAGGTCTGGAGACCTCTCTGTGTACTGGTACCAACAGAGCCTGGACCAGGGCCTCCAGTTCCTCATTCACTATTATAATGGAGAAGAGAGAGCAAAAGGAAACATTCTTGAACGATTCTCCGCACAACAGTTCCCTGACTTGCACTCTGAACTAAACCTGAGCTCTCTGGAGCTGGGGGACTCAGCTTTGTATTTCTGTGCCAGCAGCGGACAGGGACAGGGGGGTTATGGCTACACCTTCGGTTCGGGGACCAGGTTAACCGTTGTAG	GATTCTGGAGTCACACAAACCCCAAAGCACCTGATCACAGCAACTGGACAGCGAGTGACGCTGAGATGCTCCCCTAGGTCTGGAGACCTCTCTGTGTACTGGTACCAACAGAGCCTGGACCAGGGCCTCCAGTTCCTCATTCACTATTATAATGGAGAAGAGAGAGCAAAAGGAAACATTCTTGAACGATTCTCCGCACAACAGTTCCCTGACTTGCACTCTGAACTAAACCTGAGCTCTCTGGAGCTGGGGGACTCAGCTTTGTATTTCTGTGCCAGCAGCGNNNNGGGACAGGGGGNNTATGGCTACACCTTCGGTTCGGGGACCAGGTTAACCGTTGTAG	DSGVTQTPKHLITATGQRVTLRCSPRSGDLSVYWYQQSLDQGLQFLIHYYNGEERAKGNILERFSAQQFPDLHSELNLSSLELGDSALYFCASSGQGQGGYGYTFGSGTRLTVV	DSGVTQTPKHLITATGQRVTLRCSPRSGDLSVYWYQQSLDQGLQFLIHYYNGEERAKGNILERFSAQQFPDLHSELNLSSLELGDSALYFCASSXXGQGXYGYTFGSGTRLTVV	1	283	288	298	301	343	GATTCTGGAGTCACACAAACCCCAAAGCACCTGATCACAGCAACTGGACAGCGAGTGACGCTGAGATGCTCCCCTAGGTCTGGAGACCTCTCTGTGTACTGGTACCAACAGAGCCTGGACCAGGGCCTCCAGTTCCTCATTCACTATTATAATGGAGAAGAGAGAGCAAAAGGAAACATTCTTGAACGATTCTCCGCACAACAGTTCCCTGACTTGCACTCTGAACTAAACCTGAGCTCTCTGGAGCTGGGGGACTCAGCTTTGTATTTCTGTGCCAGCAGCG	DSGVTQTPKHLITATGQRVTLRCSPRSGDLSVYWYQQSLDQGLQFLIHYYNGEERAKGNILERFSAQQFPDLHSELNLSSLELGDSALYFCASS	GATTCTGGAGTCACACAAACCCCAAAGCACCTGATCACAGCAACTGGACAGCGAGTGACGCTGAGATGCTCCCCTAGGTCTGGAGACCTCTCTGTGTACTGGTACCAACAGAGCCTGGACCAGGGCCTCCAGTTCCTCATTCACTATTATAATGGAGAAGAGAGAGCAAAAGGAAACATTCTTGAACGATTCTCCGCACAACAGTTCCCTGACTTGCACTCTGAACTAAACCTGAGCTCTCTGGAGCTGGGGGACTCAGCTTTGTATTTCTGTGCCAGCAGCG	DSGVTQTPKHLITATGQRVTLRCSPRSGDLSVYWYQQSLDQGLQFLIHYYNGEERAKGNILERFSAQQFPDLHSELNLSSLELGDSALYFCASS	GGGACAGGGGG	GQG	GGGACAGGGGG	GQG	TATGGCTACACCTTCGGTTCGGGGACCAGGTTAACCGTTGTAG	YGYTFGSGTRLTVV	TATGGCTACACCTTCGGTTCGGGGACCAGGTTAACCGTTGTAG	YGYTFGSGTRLTVV	GATTCTGGAGTCACACAAACCCCAAAGCACCTGATCACAGCAACTGGACAGCGAGTGACGCTGAGATGCTCCCCTAGG	DSGVTQTPKHLITATGQRVTLRCSPR	TCTGGAGACCTCTCT	SGDLS	GTGTACTGGTACCAACAGAGCCTGGACCAGGGCCTCCAGTTCCTCATTCAC	VYWYQQSLDQGLQFLIH	TATTATAATGGAGAAGAG	YYNGEE
Pat726	KW11	TCTTTCCAGAATGTTG	TCRbeta	tig00000005_TCTTTCCAGAATGTTG	872	499	1	AATGCTGGTGTCACTCAGACCCCAAAATTCCGGGTCCTGAAGACAGGACAGAGCATGACACTGCTGTGTGCCCAGGATATGAACCATGAATACATGTACTGGTATCGACAAGACCCAGGCATGGGGCTGAGGCTGATTCATTACTCAGTTGGTGAGGGTACAACTGCCAAAGGAGAGGTCCCTGATGGCTACAATGTCTCCAGATTAAAAAAACAGAATTTCCTGCTGGGGTTGGAGTCGGCTGCTCCCTCCCAAACATCTGTGTACTTCTGTGCCAGCAGCGCAGGGATAGGGGCCAACGTCCTGACTTTCGGGGCCGGCAGCAGGCTGACCGTGCTGG	NAGVTQTPKFRVLKTGQSMTLLCAQDMNHEYMYWYRQDPGMGLRLIHYSVGEGTTAKGEVPDGYNVSRLKKQNFLLGLESAAPSQTSVYFCASSAGIGANVLTFGAGSRLTVL	TRB	F	T	F	T	F	T	TRBV6-2*01	TRBD1*01	TRBJ2-6*01	AATGCTGGTGTCACTCAGACCCCAAAATTCCGGGTCCTGAAGACAGGACAGAGCATGACACTGCTGTGTGCCCAGGATATGAACCATGAATACATGTACTGGTATCGACAAGACCCAGGCATGGGGCTGAGGCTGATTCATTACTCAGTTGGTGAGGGTACAACTGCCAAAGGAGAGGTCCCTGATGGCTACAATGTCTCCAGATTAAAAAAACAGAATTTCCTGCTGGGGTTGGAGTCGGCTGCTCCCTCCCAAACATCTGTGTACTTCTGTGCCAGCAGCGCAGGGATAGGGGCCAACGTCCTGACTTTCGGGGCCGGCAGCAGGCTGACCGTGCTGG	AATGCTGGTGTCACTCAGACCCCAAAATTCCGGGTCCTGAAGACAGGACAGAGCATGACACTGCTGTGTGCCCAGGATATGAACCATGAATACATGTACTGGTATCGACAAGACCCAGGCATGGGGCTGAGGCTGATTCATTACTCAGTTGGTGAGGGTACAACTGCCAAAGGAGAGGTCCCTGATGGCTACAATGTCTCCAGATTAAAAAAACAGAATTTCCTGCTGGGGTTGGAGTCGGCTGCTCCCTCCCAAACATCTGTGTACTTCTGTGCCAGCAGNNCAGGGNNNGGGGCCAACGTCCTGACTTTCGGGGCCGGCAGCAGGCTGACCGTGCTGG	NAGVTQTPKFRVLKTGQSMTLLCAQDMNHEYMYWYRQDPGMGLRLIHYSVGEGTTAKGEVPDGYNVSRLKKQNFLLGLESAAPSQTSVYFCASSAGIGANVLTFGAGSRLTVL	NAGVTQTPKFRVLKTGQSMTLLCAQDMNHEYMYWYRQDPGMGLRLIHYSVGEGTTAKGEVPDGYNVSRLKKQNFLLGLESAAPSQTSVYFCASXXGXGANVLTFGAGSRLTVL	1	281	284	288	292	340	AATGCTGGTGTCACTCAGACCCCAAAATTCCGGGTCCTGAAGACAGGACAGAGCATGACACTGCTGTGTGCCCAGGATATGAACCATGAATACATGTACTGGTATCGACAAGACCCAGGCATGGGGCTGAGGCTGATTCATTACTCAGTTGGTGAGGGTACAACTGCCAAAGGAGAGGTCCCTGATGGCTACAATGTCTCCAGATTAAAAAAACAGAATTTCCTGCTGGGGTTGGAGTCGGCTGCTCCCTCCCAAACATCTGTGTACTTCTGTGCCAGCAG	NAGVTQTPKFRVLKTGQSMTLLCAQDMNHEYMYWYRQDPGMGLRLIHYSVGEGTTAKGEVPDGYNVSRLKKQNFLLGLESAAPSQTSVYFCAS	AATGCTGGTGTCACTCAGACCCCAAAATTCCGGGTCCTGAAGACAGGACAGAGCATGACACTGCTGTGTGCCCAGGATATGAACCATGAATACATGTACTGGTATCGACAAGACCCAGGCATGGGGCTGAGGCTGATTCATTACTCAGTTGGTGAGGGTACAACTGCCAAAGGAGAGGTCCCTGATGGCTACAATGTCTCCAGATTAAAAAAACAGAATTTCCTGCTGGGGTTGGAGTCGGCTGCTCCCTCCCAAACATCTGTGTACTTCTGTGCCAGCAG	NAGVTQTPKFRVLKTGQSMTLLCAQDMNHEYMYWYRQDPGMGLRLIHYSVGEGTTAKGEVPDGYNVSRLKKQNFLLGLESAAPSQTSVYFCAS	CAGGG	G	CAGGG	G	GGGGCCAACGTCCTGACTTTCGGGGCCGGCAGCAGGCTGACCGTGCTGG	GANVLTFGAGSRLTVL	GGGGCCAACGTCCTGACTTTCGGGGCCGGCAGCAGGCTGACCGTGCTGG	GANVLTFGAGSRLTVL	AATGCTGGTGTCACTCAGACCCCAAAATTCCGGGTCCTGAAGACAGGACAGAGCATGACACTGCTGTGTGCCCAGGAT	NAGVTQTPKFRVLKTGQSMTLLCAQD	ATGAACCATGAATAC	MNHEY	ATGTACTGGTATCGACAAGACCCAGGCATGGGGCTGAGGCTGATTCATTAC	MYWYRQDPGMGLRLIHY	TCAGTTGGTGAGGGTACA	SVGEGT
Pat726	KW11	TCTTTCCGTCTAAAGA	TCRbeta	tig00000001_TCTTTCCGTCTAAAGA	1266	491	1	AATGCTGGTGTCACTCAGACCCCAAAATTCCAGGTCCTGAAGACAGGACAGAGCATGACACTGCAGTGTGCCCAGGATATGAACCATGAATACATGTCCTGGTATCGACAAGACCCAGGCATGGGGCTGAGGCTGATTCATTACTCAGTTGGTGCTGGTATCACTGACCAAGGAGAAGTCCCCAATGGCTACAATGTCTCCAGATCAACCACAGAGGATTTCCCGCTCAGGCTGCTGTCGGCTGCTCCCTCCCAGACATCTGTGTACTTCTGTGCCAGCATGGGGACGGTCTACAATGAGCAGTTCTTCGGGCCAGGGACACGGCTCACCGTGCTAG	NAGVTQTPKFQVLKTGQSMTLQCAQDMNHEYMSWYRQDPGMGLRLIHYSVGAGITDQGEVPNGYNVSRSTTEDFPLRLLSAAPSQTSVYFCASMGTVYNEQFFGPGTRLTVL	TRB	F	T	F	T	F	T	TRBV6-5*01	TRBD1*01	TRBJ2-1*01	AATGCTGGTGTCACTCAGACCCCAAAATTCCAGGTCCTGAAGACAGGACAGAGCATGACACTGCAGTGTGCCCAGGATATGAACCATGAATACATGTCCTGGTATCGACAAGACCCAGGCATGGGGCTGAGGCTGATTCATTACTCAGTTGGTGCTGGTATCACTGACCAAGGAGAAGTCCCCAATGGCTACAATGTCTCCAGATCAACCACAGAGGATTTCCCGCTCAGGCTGCTGTCGGCTGCTCCCTCCCAGACATCTGTGTACTTCTGTGCCAGCATGGGGACGGTCTACAATGAGCAGTTCTTCGGGCCAGGGACACGGCTCACCGTGCTAG	AATGCTGGTGTCACTCAGACCCCAAAATTCCAGGTCCTGAAGACAGGACAGAGCATGACACTGCAGTGTGCCCAGGATATGAACCATGAATACATGTCCTGGTATCGACAAGACCCAGGCATGGGGCTGAGGCTGATTCATTACTCAGTTGGTGCTGGTATCACTGACCAAGGAGAAGTCCCCAATGGCTACAATGTCTCCAGATCAACCACAGAGGATTTCCCGCTCAGGCTGCTGTCGGCTGCTCCCTCCCAGACATCTGTGTACTTCTGTGCCAGCANNGGGACNNNCTACAATGAGCAGTTCTTCGGGCCAGGGACACGGCTCACCGTGCTAG	NAGVTQTPKFQVLKTGQSMTLQCAQDMNHEYMSWYRQDPGMGLRLIHYSVGAGITDQGEVPNGYNVSRSTTEDFPLRLLSAAPSQTSVYFCASMGTVYNEQFFGPGTRLTVL	NAGVTQTPKFQVLKTGQSMTLQCAQDMNHEYMSWYRQDPGMGLRLIHYSVGAGITDQGEVPNGYNVSRSTTEDFPLRLLSAAPSQTSVYFCASXGTXYNEQFFGPGTRLTVL	1	280	283	287	291	337	AATGCTGGTGTCACTCAGACCCCAAAATTCCAGGTCCTGAAGACAGGACAGAGCATGACACTGCAGTGTGCCCAGGATATGAACCATGAATACATGTCCTGGTATCGACAAGACCCAGGCATGGGGCTGAGGCTGATTCATTACTCAGTTGGTGCTGGTATCACTGACCAAGGAGAAGTCCCCAATGGCTACAATGTCTCCAGATCAACCACAGAGGATTTCCCGCTCAGGCTGCTGTCGGCTGCTCCCTCCCAGACATCTGTGTACTTCTGTGCCAGCA	NAGVTQTPKFQVLKTGQSMTLQCAQDMNHEYMSWYRQDPGMGLRLIHYSVGAGITDQGEVPNGYNVSRSTTEDFPLRLLSAAPSQTSVYFCAS	AATGCTGGTGTCACTCAGACCCCAAAATTCCAGGTCCTGAAGACAGGACAGAGCATGACACTGCAGTGTGCCCAGGATATGAACCATGAATACATGTCCTGGTATCGACAAGACCCAGGCATGGGGCTGAGGCTGATTCATTACTCAGTTGGTGCTGGTATCACTGACCAAGGAGAAGTCCCCAATGGCTACAATGTCTCCAGATCAACCACAGAGGATTTCCCGCTCAGGCTGCTGTCGGCTGCTCCCTCCCAGACATCTGTGTACTTCTGTGCCAGCA	NAGVTQTPKFQVLKTGQSMTLQCAQDMNHEYMSWYRQDPGMGLRLIHYSVGAGITDQGEVPNGYNVSRSTTEDFPLRLLSAAPSQTSVYFCAS	GGGAC	GT	GGGAC	GT	CTACAATGAGCAGTTCTTCGGGCCAGGGACACGGCTCACCGTGCTAG	YNEQFFGPGTRLTVL	CTACAATGAGCAGTTCTTCGGGCCAGGGACACGGCTCACCGTGCTAG	YNEQFFGPGTRLTVL	AATGCTGGTGTCACTCAGACCCCAAAATTCCAGGTCCTGAAGACAGGACAGAGCATGACACTGCAGTGTGCCCAGGAT	NAGVTQTPKFQVLKTGQSMTLQCAQD	ATGAACCATGAATAC	MNHEY	ATGTCCTGGTATCGACAAGACCCAGGCATGGGGCTGAGGCTGATTCATTAC	MSWYRQDPGMGLRLIHY	TCAGTTGGTGCTGGTATC	SVGAGI
Pat726	KW11	TGCTGCTTCTGTGCAA	TCRbeta	tig00000028_TGCTGCTTCTGTGCAA	830	333	1	GGTGCTGGAGTCTCCCAGTCTCCCAGGTACAAAGTCACAAAGAGGGGACAGGATGTAGCTCTCAGGTGTGATCCAATTTCGGGTCATGTATCCCTTTATTGGTACCGACAGGCCCTGGGGCAGGGCCCAGAGTTTCTGACTTACTTCAATTATGAAGCCCAACAAGACAAATCAGGGCTGCCCAATGATCGGTTCTCTGCAGAGAGGCCTGAGGGATCCATCTCCACTCTGACGATCCAGCGCACAGAGCAGCGGGACTCGGCCATGTATCGCTGTGCCAGCAGCACACACAATGAGCAGTTCTTCGGGCCAGGGACACGGCTCACCGTGCTAG	GAGVSQSPRYKVTKRGQDVALRCDPISGHVSLYWYRQALGQGPEFLTYFNYEAQQDKSGLPNDRFSAERPEGSISTLTIQRTEQRDSAMYRCASSTHNEQFFGPGTRLTVL	TRB	F	T	F	T	F	T	TRBV7-6*01		TRBJ2-1*01	GGTGCTGGAGTCTCCCAGTCTCCCAGGTACAAAGTCACAAAGAGGGGACAGGATGTAGCTCTCAGGTGTGATCCAATTTCGGGTCATGTATCCCTTTATTGGTACCGACAGGCCCTGGGGCAGGGCCCAGAGTTTCTGACTTACTTCAATTATGAAGCCCAACAAGACAAATCAGGGCTGCCCAATGATCGGTTCTCTGCAGAGAGGCCTGAGGGATCCATCTCCACTCTGACGATCCAGCGCACAGAGCAGCGGGACTCGGCCATGTATCGCTGTGCCAGCAGCACACACAATGAGCAGTTCTTCGGGCCAGGGACACGGCTCACCGTGCTAG	GGTGCTGGAGTCTCCCAGTCTCCCAGGTACAAAGTCACAAAGAGGGGACAGGATGTAGCTCTCAGGTGTGATCCAATTTCGGGTCATGTATCCCTTTATTGGTACCGACAGGCCCTGGGGCAGGGCCCAGAGTTTCTGACTTACTTCAATTATGAAGCCCAACAAGACAAATCAGGGCTGCCCAATGATCGGTTCTCTGCAGAGAGGCCTGAGGGATCCATCTCCACTCTGACGATCCAGCGCACAGAGCAGCGGGACTCGGCCATGTATCGCTGTGCCAGCAGCNNNNACAATGAGCAGTTCTTCGGGCCAGGGACACGGCTCACCGTGCTAG	GAGVSQSPRYKVTKRGQDVALRCDPISGHVSLYWYRQALGQGPEFLTYFNYEAQQDKSGLPNDRFSAERPEGSISTLTIQRTEQRDSAMYRCASSTHNEQFFGPGTRLTVL	GAGVSQSPRYKVTKRGQDVALRCDPISGHVSLYWYRQALGQGPEFLTYFNYEAQQDKSGLPNDRFSAERPEGSISTLTIQRTEQRDSAMYRCASSXXNEQFFGPGTRLTVL	1	285			290	334	GGTGCTGGAGTCTCCCAGTCTCCCAGGTACAAAGTCACAAAGAGGGGACAGGATGTAGCTCTCAGGTGTGATCCAATTTCGGGTCATGTATCCCTTTATTGGTACCGACAGGCCCTGGGGCAGGGCCCAGAGTTTCTGACTTACTTCAATTATGAAGCCCAACAAGACAAATCAGGGCTGCCCAATGATCGGTTCTCTGCAGAGAGGCCTGAGGGATCCATCTCCACTCTGACGATCCAGCGCACAGAGCAGCGGGACTCGGCCATGTATCGCTGTGCCAGCAGC	GAGVSQSPRYKVTKRGQDVALRCDPISGHVSLYWYRQALGQGPEFLTYFNYEAQQDKSGLPNDRFSAERPEGSISTLTIQRTEQRDSAMYRCASS	GGTGCTGGAGTCTCCCAGTCTCCCAGGTACAAAGTCACAAAGAGGGGACAGGATGTAGCTCTCAGGTGTGATCCAATTTCGGGTCATGTATCCCTTTATTGGTACCGACAGGCCCTGGGGCAGGGCCCAGAGTTTCTGACTTACTTCAATTATGAAGCCCAACAAGACAAATCAGGGCTGCCCAATGATCGGTTCTCTGCAGAGAGGCCTGAGGGATCCATCTCCACTCTGACGATCCAGCGCACAGAGCAGCGGGACTCGGCCATGTATCGCTGTGCCAGCAGC	GAGVSQSPRYKVTKRGQDVALRCDPISGHVSLYWYRQALGQGPEFLTYFNYEAQQDKSGLPNDRFSAERPEGSISTLTIQRTEQRDSAMYRCASS					ACAATGAGCAGTTCTTCGGGCCAGGGACACGGCTCACCGTGCTAG	NEQFFGPGTRLTVL	ACAATGAGCAGTTCTTCGGGCCAGGGACACGGCTCACCGTGCTAG	NEQFFGPGTRLTVL	GGTGCTGGAGTCTCCCAGTCTCCCAGGTACAAAGTCACAAAGAGGGGACAGGATGTAGCTCTCAGGTGTGATCCAATT	GAGVSQSPRYKVTKRGQDVALRCDPI	TCGGGTCATGTATCC	SGHVS	CTTTATTGGTACCGACAGGCCCTGGGGCAGGGCCCAGAGTTTCTGACTTAC	LYWYRQALGQGPEFLTY	TTCAATTATGAAGCCCAA	FNYEAQ
Pat726	KW11	TGGTTAGTCCACGTGG	TCRbeta	tig00000011_TGGTTAGTCCACGTGG	706	337	1	GAGACTGGAGTCACCCAAAGTCCCACACACCTGATCAAAACGAGAGGACAGCAAGTGACTCTGAGATGCTCTTCTCAGTCTGGGCACAACACTGTGTCCTGGTACCAACAGGCCCTGGGTCAGGGGCCCCAGTTTATCTTTCAGTATTATAGGGAGGAAGAGAATGGCAGAGGAAACTTCCCTCCTAGATTCTCAGGTCTCCAGTTCCCTAATTATAGCTCTGAGCTGAATGTGAACGCCTTGGAGCTGGACGACTCGGCCCTGTATCTCTGTGCCAGCAGCTTGGAGGGGGGGATGAGCTATGGCTACACCTTCGGTTCGGGGACCAGGTTAACCGTTGTAG	ETGVTQSPTHLIKTRGQQVTLRCSSQSGHNTVSWYQQALGQGPQFIFQYYREEENGRGNFPPRFSGLQFPNYSSELNVNALELDDSALYLCASSLEGGMSYGYTFGSGTRLTVV	TRB	F	T	F	T	F	T	TRBV5-4*01	TRBD2*01	TRBJ1-2*01	GAGACTGGAGTCACCCAAAGTCCCACACACCTGATCAAAACGAGAGGACAGCAAGTGACTCTGAGATGCTCTTCTCAGTCTGGGCACAACACTGTGTCCTGGTACCAACAGGCCCTGGGTCAGGGGCCCCAGTTTATCTTTCAGTATTATAGGGAGGAAGAGAATGGCAGAGGAAACTTCCCTCCTAGATTCTCAGGTCTCCAGTTCCCTAATTATAGCTCTGAGCTGAATGTGAACGCCTTGGAGCTGGACGACTCGGCCCTGTATCTCTGTGCCAGCAGCTTGGAGGGGGGGATGAGCTATGGCTACACCTTCGGTTCGGGGACCAGGTTAACCGTTGTAG	GAGACTGGAGTCACCCAAAGTCCCACACACCTGATCAAAACGAGAGGACAGCAAGTGACTCTGAGATGCTCTTCTCAGTCTGGGCACAACACTGTGTCCTGGTACCAACAGGCCCTGGGTCAGGGGCCCCAGTTTATCTTTCAGTATTATAGGGAGGAAGAGAATGGCAGAGGAAACTTCCCTCCTAGATTCTCAGGTCTCCAGTTCCCTAATTATAGCTCTGAGCTGAATGTGAACGCCTTGGAGCTGGACGACTCGGCCCTGTATCTCTGTGCCAGCAGCTTGGNGGGGGGGNNNNNCTATGGCTACACCTTCGGTTCGGGGACCAGGTTAACCGTTGTAG	ETGVTQSPTHLIKTRGQQVTLRCSSQSGHNTVSWYQQALGQGPQFIFQYYREEENGRGNFPPRFSGLQFPNYSSELNVNALELDDSALYLCASSLEGGMSYGYTFGSGTRLTVV	ETGVTQSPTHLIKTRGQQVTLRCSSQSGHNTVSWYQQALGQGPQFIFQYYREEENGRGNFPPRFSGLQFPNYSSELNVNALELDDSALYLCASSLXGGXXYGYTFGSGTRLTVV	1	286	288	294	300	343	GAGACTGGAGTCACCCAAAGTCCCACACACCTGATCAAAACGAGAGGACAGCAAGTGACTCTGAGATGCTCTTCTCAGTCTGGGCACAACACTGTGTCCTGGTACCAACAGGCCCTGGGTCAGGGGCCCCAGTTTATCTTTCAGTATTATAGGGAGGAAGAGAATGGCAGAGGAAACTTCCCTCCTAGATTCTCAGGTCTCCAGTTCCCTAATTATAGCTCTGAGCTGAATGTGAACGCCTTGGAGCTGGACGACTCGGCCCTGTATCTCTGTGCCAGCAGCTTGG	ETGVTQSPTHLIKTRGQQVTLRCSSQSGHNTVSWYQQALGQGPQFIFQYYREEENGRGNFPPRFSGLQFPNYSSELNVNALELDDSALYLCASSL	GAGACTGGAGTCACCCAAAGTCCCACACACCTGATCAAAACGAGAGGACAGCAAGTGACTCTGAGATGCTCTTCTCAGTCTGGGCACAACACTGTGTCCTGGTACCAACAGGCCCTGGGTCAGGGGCCCCAGTTTATCTTTCAGTATTATAGGGAGGAAGAGAATGGCAGAGGAAACTTCCCTCCTAGATTCTCAGGTCTCCAGTTCCCTAATTATAGCTCTGAGCTGAATGTGAACGCCTTGGAGCTGGACGACTCGGCCCTGTATCTCTGTGCCAGCAGCTTGG	ETGVTQSPTHLIKTRGQQVTLRCSSQSGHNTVSWYQQALGQGPQFIFQYYREEENGRGNFPPRFSGLQFPNYSSELNVNALELDDSALYLCASSL	GGGGGGG	GG	GGGGGGG	GG	CTATGGCTACACCTTCGGTTCGGGGACCAGGTTAACCGTTGTAG	YGYTFGSGTRLTVV	CTATGGCTACACCTTCGGTTCGGGGACCAGGTTAACCGTTGTAG	YGYTFGSGTRLTVV	GAGACTGGAGTCACCCAAAGTCCCACACACCTGATCAAAACGAGAGGACAGCAAGTGACTCTGAGATGCTCTTCTCAG	ETGVTQSPTHLIKTRGQQVTLRCSSQ	TCTGGGCACAACACT	SGHNT	GTGTCCTGGTACCAACAGGCCCTGGGTCAGGGGCCCCAGTTTATCTTTCAG	VSWYQQALGQGPQFIFQ	TATTATAGGGAGGAAGAG	YYREEE
Pat726	KW11	TTAGGCATCATACGGT	TCRbeta	tig00000002_TTAGGCATCATACGGT	467	495	1	GACACTGAAGTTACCCAGACACCAAAACACCTGGTCATGGGAATGACAAATAAGAAGTCTTTGAAATGTGAACAACATATGGGGCACAGGGCTATGTATTGGTACAAGCAGAAAGCTAAGAAGCCACCGGAGCTCATGTTTGTCTACAGCTATGAGAAACTCTCTATAAATGAAAGTGTGCCAAGTCGCTTCTCACCTGAATGCCCCAACAGCTCTCTCTTAAACCTTCACCTACACGCCCTGCAGCCAGAAGACTCAGCTTTGTATTTCTGTGCCAGCAGCGTAGGGTCTAGCGGGGTAGGCCAGTACTTCGGGCCAGGCACGCGGCTCCTGGTGCTCG	DTEVTQTPKHLVMGMTNKKSLKCEQHMGHRAMYWYKQKAKKPPELMFVYSYEKLSINESVPSRFSPECPNSSLLNLHLHALQPEDSALYFCASSVGSSGVGQYFGPGTRLLVL	TRB	F	T	F	T	F	T	TRBV4-1*01	TRBD2*01	TRBJ2-5*01	GACACTGAAGTTACCCAGACACCAAAACACCTGGTCATGGGAATGACAAATAAGAAGTCTTTGAAATGTGAACAACATATGGGGCACAGGGCTATGTATTGGTACAAGCAGAAAGCTAAGAAGCCACCGGAGCTCATGTTTGTCTACAGCTATGAGAAACTCTCTATAAATGAAAGTGTGCCAAGTCGCTTCTCACCTGAATGCCCCAACAGCTCTCTCTTAAACCTTCACCTACACGCCCTGCAGCCAGAAGACTCAGCTTTGTATTTCTGTGCCAGCAGCGTAGGGTCTAGCGGGGTAGGCCAGTACTTCGGGCCAGGCACGCGGCTCCTGGTGCTCG	GACACTGAAGTTACCCAGACACCAAAACACCTGGTCATGGGAATGACAAATAAGAAGTCTTTGAAATGTGAACAACATATGGGGCACAGGGCTATGTATTGGTACAAGCAGAAAGCTAAGAAGCCACCGGAGCTCATGTTTGTCTACAGCTATGAGAAACTCTCTATAAATGAAAGTGTGCCAAGTCGCTTCTCACCTGAATGCCCCAACAGCTCTCTCTTAAACCTTCACCTACACGCCCTGCAGCCAGAAGACTCAGCCCTGTATCTCTGCGCCAGCAGCNNNGGGACTAGCGGGGNNNNCCAGTACTTCGGGCCAGGCACGCGGCTCCTGGTGCTCG	DTEVTQTPKHLVMGMTNKKSLKCEQHMGHRAMYWYKQKAKKPPELMFVYSYEKLSINESVPSRFSPECPNSSLLNLHLHALQPEDSALYFCASSVGSSGVGQYFGPGTRLLVL	DTEVTQTPKHLVMGMTNKKSLKCEQHMGHRAMYWYKQKAKKPPELMFVYSYEKLSINESVPSRFSPECPNSSLLNLHLHALQPEDSALYLCASSXGTSGXXQYFGPGTRLLVL	1	282	286	298	303	340	GACACTGAAGTTACCCAGACACCAAAACACCTGGTCATGGGAATGACAAATAAGAAGTCTTTGAAATGTGAACAACATATGGGGCACAGGGCTATGTATTGGTACAAGCAGAAAGCTAAGAAGCCACCGGAGCTCATGTTTGTCTACAGCTATGAGAAACTCTCTATAAATGAAAGTGTGCCAAGTCGCTTCTCACCTGAATGCCCCAACAGCTCTCTCTTAAACCTTCACCTACACGCCCTGCAGCCAGAAGACTCAGCTTTGTATTTCTGTGCCAGCAGC	DTEVTQTPKHLVMGMTNKKSLKCEQHMGHRAMYWYKQKAKKPPELMFVYSYEKLSINESVPSRFSPECPNSSLLNLHLHALQPEDSALYFCASS	GACACTGAAGTTACCCAGACACCAAAACACCTGGTCATGGGAATGACAAATAAGAAGTCTTTGAAATGTGAACAACATATGGGGCACAGGGCTATGTATTGGTACAAGCAGAAAGCTAAGAAGCCACCGGAGCTCATGTTTGTCTACAGCTATGAGAAACTCTCTATAAATGAAAGTGTGCCAAGTCGCTTCTCACCTGAATGCCCCAACAGCTCTCTCTTAAACCTTCACCTACACGCCCTGCAGCCAGAAGACTCAGCCCTGTATCTCTGCGCCAGCAGC	DTEVTQTPKHLVMGMTNKKSLKCEQHMGHRAMYWYKQKAKKPPELMFVYSYEKLSINESVPSRFSPECPNSSLLNLHLHALQPEDSALYLCASS	GGGTCTAGCGGGG	GSSG	GGGACTAGCGGGG	GTSG	CCAGTACTTCGGGCCAGGCACGCGGCTCCTGGTGCTCG	QYFGPGTRLLVL	CCAGTACTTCGGGCCAGGCACGCGGCTCCTGGTGCTCG	QYFGPGTRLLVL	GACACTGAAGTTACCCAGACACCAAAACACCTGGTCATGGGAATGACAAATAAGAAGTCTTTGAAATGTGAACAACAT	DTEVTQTPKHLVMGMTNKKSLKCEQH	ATGGGGCACAGGGCT	MGHRA	ATGTATTGGTACAAGCAGAAAGCTAAGAAGCCACCGGAGCTCATGTTTGTC	MYWYKQKAKKPPELMFV	TACAGCTATGAGAAACTC	YSYEKL
Pat726	IW9	TTATGCTGTTCAGCGC	TCRbeta	tig00000028_TTATGCTGTTCAGCGC	867	148	1	GACGCTGGAGTCACCCAAAGTCCCACACACCTGATCAAAACGAGAGGACAGCACGTGACTCTGAGATGCTCTCCTATCTCTGGGCACAAGAGTGTGTCCTGGTACCAACAGGTCCTGGGTCAGGGGCCCCAGTTTATCTTTCAGTATTATGAGAAAGAAGAGAGAGGAAGAGGAAACTTCCCTGATCGATTCTCAGCTCGCCAGTTCCCTAACTATAGCTCTGAGCTGAATGTGAACGCCTTGTTGCTGGGGGACTCGGCCCTGTATCTCTGTGCCACCCTCGGCGGTGATACGCAGTATTTTGGCCCAGGCACCCGGCTGACAGTGCTCG	DAGVTQSPTHLIKTRGQHVTLRCSPISGHKSVSWYQQVLGQGPQFIFQYYEKEERGRGNFPDRFSARQFPNYSSELNVNALLLGDSALYLCATLGGDTQYFGPGTRLTVL	TRB	F	T	F	T	F	T	TRBV5-5*02		TRBJ2-3*01	GACGCTGGAGTCACCCAAAGTCCCACACACCTGATCAAAACGAGAGGACAGCACGTGACTCTGAGATGCTCTCCTATCTCTGGGCACAAGAGTGTGTCCTGGTACCAACAGGTCCTGGGTCAGGGGCCCCAGTTTATCTTTCAGTATTATGAGAAAGAAGAGAGAGGAAGAGGAAACTTCCCTGATCGATTCTCAGCTCGCCAGTTCCCTAACTATAGCTCTGAGCTGAATGTGAACGCCTTGTTGCTGGGGGACTCGGCCCTGTATCTCTGTGCCACCCTCGGCGGTGATACGCAGTATTTTGGCCCAGGCACCCGGCTGACAGTGCTCG	GACGCTGGAGTCACCCAAAGTCCCACACACCTGATCAAAACGAGAGGACAGCACGTGACTCTGAGATGCTCTCCTATCTCTGGGCACAAGAGTGTGTCCTGGTACCAACAGGTCCTGGGTCAGGGGCCCCAGTTTATCTTTCAGTATTATGAGAAAGAAGAGAGAGGAAGAGGAAACTTCCCTGATCGATTCTCAGCTCGCCAGTTCCCTAACTATAGCTCTGAGCTGAATGTGAACGCCTTGTTGCTGGGGGACTCGGCCCTGTATCTCTGTGCCANNNNNNNNNNNGATACGCAGTATTTTGGCCCAGGCACCCGGCTGACAGTGCTCG	DAGVTQSPTHLIKTRGQHVTLRCSPISGHKSVSWYQQVLGQGPQFIFQYYEKEERGRGNFPDRFSARQFPNYSSELNVNALLLGDSALYLCATLGGDTQYFGPGTRLTVL	DAGVTQSPTHLIKTRGQHVTLRCSPISGHKSVSWYQQVLGQGPQFIFQYYEKEERGRGNFPDRFSARQFPNYSSELNVNALLLGDSALYLCAXXXXDTQYFGPGTRLTVL	1	277			289	331	GACGCTGGAGTCACCCAAAGTCCCACACACCTGATCAAAACGAGAGGACAGCACGTGACTCTGAGATGCTCTCCTATCTCTGGGCACAAGAGTGTGTCCTGGTACCAACAGGTCCTGGGTCAGGGGCCCCAGTTTATCTTTCAGTATTATGAGAAAGAAGAGAGAGGAAGAGGAAACTTCCCTGATCGATTCTCAGCTCGCCAGTTCCCTAACTATAGCTCTGAGCTGAATGTGAACGCCTTGTTGCTGGGGGACTCGGCCCTGTATCTCTGTGCCA	DAGVTQSPTHLIKTRGQHVTLRCSPISGHKSVSWYQQVLGQGPQFIFQYYEKEERGRGNFPDRFSARQFPNYSSELNVNALLLGDSALYLCA	GACGCTGGAGTCACCCAAAGTCCCACACACCTGATCAAAACGAGAGGACAGCACGTGACTCTGAGATGCTCTCCTATCTCTGGGCACAAGAGTGTGTCCTGGTACCAACAGGTCCTGGGTCAGGGGCCCCAGTTTATCTTTCAGTATTATGAGAAAGAAGAGAGAGGAAGAGGAAACTTCCCTGATCGATTCTCAGCTCGCCAGTTCCCTAACTATAGCTCTGAGCTGAATGTGAACGCCTTGTTGCTGGGGGACTCGGCCCTGTATCTCTGTGCCA	DAGVTQSPTHLIKTRGQHVTLRCSPISGHKSVSWYQQVLGQGPQFIFQYYEKEERGRGNFPDRFSARQFPNYSSELNVNALLLGDSALYLCA					GATACGCAGTATTTTGGCCCAGGCACCCGGCTGACAGTGCTCG	DTQYFGPGTRLTVL	GATACGCAGTATTTTGGCCCAGGCACCCGGCTGACAGTGCTCG	DTQYFGPGTRLTVL	GACGCTGGAGTCACCCAAAGTCCCACACACCTGATCAAAACGAGAGGACAGCACGTGACTCTGAGATGCTCTCCTATC	DAGVTQSPTHLIKTRGQHVTLRCSPI	TCTGGGCACAAGAGT	SGHKS	GTGTCCTGGTACCAACAGGTCCTGGGTCAGGGGCCCCAGTTTATCTTTCAG	VSWYQQVLGQGPQFIFQ	TATTATGAGAAAGAAGAG	YYEKEE
Pat726	IW9	TTCCCAGCAGATGGCA	TCRbeta	tig00000008_TTCCCAGCAGATGGCA	1030	497	1	GATTCTGGAGTCACACAAACCCCAAAGCACCTGATCACAGCAACTGGACAGCGAGTGACGCTGAGATGCTCCCCTAGGTCTGGAGACCTCTCTGTGTACTGGTACCAACAGAGCCTGGACCAGGGCCTCCAGTTCCTCATTCACTATTATAATGGAGAAGAGAGAGCAAAAGGAAACATTCTTGAACGATTCTCCGCACAACAGTTCCCTGACTTGCACTCTGAACTAAACCTGAGCTCTCTGGAGCTGGGGGACTCAGCTTTGTATTTCTGTGCCAGCAGCGTAGAACTAGCGGACTACACCGGGGAGCTGTTTTTTGGAGAAGGCTCTAGGCTGACCGTACTGG	DSGVTQTPKHLITATGQRVTLRCSPRSGDLSVYWYQQSLDQGLQFLIHYYNGEERAKGNILERFSAQQFPDLHSELNLSSLELGDSALYFCASSVELADYTGELFFGEGSRLTVL	TRB	F	T	F	T	F	T	TRBV9*02	TRBD2*01	TRBJ2-2*01	GATTCTGGAGTCACACAAACCCCAAAGCACCTGATCACAGCAACTGGACAGCGAGTGACGCTGAGATGCTCCCCTAGGTCTGGAGACCTCTCTGTGTACTGGTACCAACAGAGCCTGGACCAGGGCCTCCAGTTCCTCATTCACTATTATAATGGAGAAGAGAGAGCAAAAGGAAACATTCTTGAACGATTCTCCGCACAACAGTTCCCTGACTTGCACTCTGAACTAAACCTGAGCTCTCTGGAGCTGGGGGACTCAGCTTTGTATTTCTGTGCCAGCAGCGTAGAACTAGCGGACTACACCGGGGAGCTGTTTTTTGGAGAAGGCTCTAGGCTGACCGTACTGG	GATTCTGGAGTCACACAAACCCCAAAGCACCTGATCACAGCAACTGGACAGCGAGTGACGCTGAGATGCTCCCCTAGGTCTGGAGACCTCTCTGTGTACTGGTACCAACAGAGCCTGGACCAGGGCCTCCAGTTCCTCATTCACTATTATAATGGAGAAGAGAGAGCAAAAGGAAACATTCTTGAACGATTCTCCGCACAACAGTTCCCTGACTTGCACTCTGAACTAAACCTGAGCTCTCTGGAGCTGGGGGACTCAGCTTTGTATTTCTGTGCCAGCAGCGTAGNACTAGCGGNNNACACCGGGGAGCTGTTTTTTGGAGAAGGCTCTAGGCTGACCGTACTGG	DSGVTQTPKHLITATGQRVTLRCSPRSGDLSVYWYQQSLDQGLQFLIHYYNGEERAKGNILERFSAQQFPDLHSELNLSSLELGDSALYFCASSVELADYTGELFFGEGSRLTVL	DSGVTQTPKHLITATGQRVTLRCSPRSGDLSVYWYQQSLDQGLQFLIHYYNGEERAKGNILERFSAQQFPDLHSELNLSSLELGDSALYFCASSVXLAXXTGELFFGEGSRLTVL	1	286	288	295	299	346	GATTCTGGAGTCACACAAACCCCAAAGCACCTGATCACAGCAACTGGACAGCGAGTGACGCTGAGATGCTCCCCTAGGTCTGGAGACCTCTCTGTGTACTGGTACCAACAGAGCCTGGACCAGGGCCTCCAGTTCCTCATTCACTATTATAATGGAGAAGAGAGAGCAAAAGGAAACATTCTTGAACGATTCTCCGCACAACAGTTCCCTGACTTGCACTCTGAACTAAACCTGAGCTCTCTGGAGCTGGGGGACTCAGCTTTGTATTTCTGTGCCAGCAGCGTAG	DSGVTQTPKHLITATGQRVTLRCSPRSGDLSVYWYQQSLDQGLQFLIHYYNGEERAKGNILERFSAQQFPDLHSELNLSSLELGDSALYFCASSV	GATTCTGGAGTCACACAAACCCCAAAGCACCTGATCACAGCAACTGGACAGCGAGTGACGCTGAGATGCTCCCCTAGGTCTGGAGACCTCTCTGTGTACTGGTACCAACAGAGCCTGGACCAGGGCCTCCAGTTCCTCATTCACTATTATAATGGAGAAGAGAGAGCAAAAGGAAACATTCTTGAACGATTCTCCGCACAACAGTTCCCTGACTTGCACTCTGAACTAAACCTGAGCTCTCTGGAGCTGGGGGACTCAGCTTTGTATTTCTGTGCCAGCAGCGTAG	DSGVTQTPKHLITATGQRVTLRCSPRSGDLSVYWYQQSLDQGLQFLIHYYNGEERAKGNILERFSAQQFPDLHSELNLSSLELGDSALYFCASSV	ACTAGCGG	LA	ACTAGCGG	LA	ACACCGGGGAGCTGTTTTTTGGAGAAGGCTCTAGGCTGACCGTACTGG	TGELFFGEGSRLTVL	ACACCGGGGAGCTGTTTTTTGGAGAAGGCTCTAGGCTGACCGTACTGG	TGELFFGEGSRLTVL	GATTCTGGAGTCACACAAACCCCAAAGCACCTGATCACAGCAACTGGACAGCGAGTGACGCTGAGATGCTCCCCTAGG	DSGVTQTPKHLITATGQRVTLRCSPR	TCTGGAGACCTCTCT	SGDLS	GTGTACTGGTACCAACAGAGCCTGGACCAGGGCCTCCAGTTCCTCATTCAC	VYWYQQSLDQGLQFLIH	TATTATAATGGAGAAGAG	YYNGEE
Pat726	IW9	TTCTACACACTGTCGG	TCRbeta	tig00000018_TTCTACACACTGTCGG	1099	174	1	GATACTGGAGTCTCCCAGGACCCCAGACACAAGATCACAAAGAGGGGACAGAATGTAACTTTCAGGTGTGATCCAATTTCTGAACACAACCGCCTTTATTGGTACCGACAGACCCTGGGGCAGGGCCCAGAGTTTCTGACTTACTTCCAGAATGAAGCTCAACTAGAAAAATCAAGGCTGCTCAGTGATCGGTTCTCTGCAGAGAGGCCTAAGGGATCTTTCTCCACCTTGGAGATCCAGCGCACAGAGCAGGGGGACTCGGCCATGTATCTCTGTGCCAGCAGCTTAGTGCAAGAGACCCAGTACTTCGGGCCAGGCACGCGGCTCCTGGTGCTCG	DTGVSQDPRHKITKRGQNVTFRCDPISEHNRLYWYRQTLGQGPEFLTYFQNEAQLEKSRLLSDRFSAERPKGSFSTLEIQRTEQGDSAMYLCASSLVQETQYFGPGTRLLVL	TRB	F	T	F	T	F	T	TRBV7-9*03		TRBJ2-5*01	GATACTGGAGTCTCCCAGGACCCCAGACACAAGATCACAAAGAGGGGACAGAATGTAACTTTCAGGTGTGATCCAATTTCTGAACACAACCGCCTTTATTGGTACCGACAGACCCTGGGGCAGGGCCCAGAGTTTCTGACTTACTTCCAGAATGAAGCTCAACTAGAAAAATCAAGGCTGCTCAGTGATCGGTTCTCTGCAGAGAGGCCTAAGGGATCTTTCTCCACCTTGGAGATCCAGCGCACAGAGCAGGGGGACTCGGCCATGTATCTCTGTGCCAGCAGCTTAGTGCAAGAGACCCAGTACTTCGGGCCAGGCACGCGGCTCCTGGTGCTCG	GATACTGGAGTCTCCCAGGACCCCAGACACAAGATCACAAAGAGGGGACAGAATGTAACTTTCAGGTGTGATCCAATTTCTGAACACAACCGCCTTTATTGGTACCGACAGACCCTGGGGCAGGGCCCAGAGTTTCTGACTTACTTCCAGAATGAAGCTCAACTAGAAAAATCAAGGCTGCTCAGTGATCGGTTCTCTGCAGAGAGGCCTAAGGGATCTTTCTCCACCTTGGAGATCCAGCGCACAGAGCAGGGGGACTCGGCCATGTATCTCTGTGCCAGCAGCTTAGNNCAAGAGACCCAGTACTTCGGGCCAGGCACGCGGCTCCTGGTGCTCG	DTGVSQDPRHKITKRGQNVTFRCDPISEHNRLYWYRQTLGQGPEFLTYFQNEAQLEKSRLLSDRFSAERPKGSFSTLEIQRTEQGDSAMYLCASSLVQETQYFGPGTRLLVL	DTGVSQDPRHKITKRGQNVTFRCDPISEHNRLYWYRQTLGQGPEFLTYFQNEAQLEKSRLLSDRFSAERPKGSFSTLEIQRTEQGDSAMYLCASSLXQETQYFGPGTRLLVL	1	289			292	337	GATACTGGAGTCTCCCAGGACCCCAGACACAAGATCACAAAGAGGGGACAGAATGTAACTTTCAGGTGTGATCCAATTTCTGAACACAACCGCCTTTATTGGTACCGACAGACCCTGGGGCAGGGCCCAGAGTTTCTGACTTACTTCCAGAATGAAGCTCAACTAGAAAAATCAAGGCTGCTCAGTGATCGGTTCTCTGCAGAGAGGCCTAAGGGATCTTTCTCCACCTTGGAGATCCAGCGCACAGAGCAGGGGGACTCGGCCATGTATCTCTGTGCCAGCAGCTTAG	DTGVSQDPRHKITKRGQNVTFRCDPISEHNRLYWYRQTLGQGPEFLTYFQNEAQLEKSRLLSDRFSAERPKGSFSTLEIQRTEQGDSAMYLCASSL	GATACTGGAGTCTCCCAGGACCCCAGACACAAGATCACAAAGAGGGGACAGAATGTAACTTTCAGGTGTGATCCAATTTCTGAACACAACCGCCTTTATTGGTACCGACAGACCCTGGGGCAGGGCCCAGAGTTTCTGACTTACTTCCAGAATGAAGCTCAACTAGAAAAATCAAGGCTGCTCAGTGATCGGTTCTCTGCAGAGAGGCCTAAGGGATCTTTCTCCACCTTGGAGATCCAGCGCACAGAGCAGGGGGACTCGGCCATGTATCTCTGTGCCAGCAGCTTAG	DTGVSQDPRHKITKRGQNVTFRCDPISEHNRLYWYRQTLGQGPEFLTYFQNEAQLEKSRLLSDRFSAERPKGSFSTLEIQRTEQGDSAMYLCASSL					CAAGAGACCCAGTACTTCGGGCCAGGCACGCGGCTCCTGGTGCTCG	QETQYFGPGTRLLVL	CAAGAGACCCAGTACTTCGGGCCAGGCACGCGGCTCCTGGTGCTCG	QETQYFGPGTRLLVL	GATACTGGAGTCTCCCAGGACCCCAGACACAAGATCACAAAGAGGGGACAGAATGTAACTTTCAGGTGTGATCCAATT	DTGVSQDPRHKITKRGQNVTFRCDPI	TCTGAACACAACCGC	SEHNR	CTTTATTGGTACCGACAGACCCTGGGGCAGGGCCCAGAGTTTCTGACTTAC	LYWYRQTLGQGPEFLTY	TTCCAGAATGAAGCTCAA	FQNEAQ
Pat726	KW11	TTTGTCAGTGCTAGCC	TCRbeta	tig00000006_TTTGTCAGTGCTAGCC	720	228	1	AATGCTGGTGTCACTCAGACCCCAAAATTCCGGGTCCTGAAGACAGGACAGAGCATGACACTGCTGTGTGCCCAGGATATGAACCATGAATACATGTACTGGTATCGACAAGACCCAGGCATGGGGCTGAGGCTGATTCATTACTCAGTTGGTGAGGGTACAACTGCCAAAGGAGAGGTCCCTGATGGCTACAATGTCTCCAGATTAAAAAAACAGAATTTCCTGCTGGGGTTGGAGTCGGCTGCTCCCTCCCAAACATCTGTGTACTTCTGTGCCAGCAGCGAGGAGCGGGGGAACACAGATACGCAGTATTTTGGCCCAGGCACCCGGCTGACAGTGCTCG	NAGVTQTPKFRVLKTGQSMTLLCAQDMNHEYMYWYRQDPGMGLRLIHYSVGEGTTAKGEVPDGYNVSRLKKQNFLLGLESAAPSQTSVYFCASSEERGNTDTQYFGPGTRLTVL	TRB	F	T	F	T	F	T	TRBV6-2*01	TRBD2*01	TRBJ2-3*01	AATGCTGGTGTCACTCAGACCCCAAAATTCCGGGTCCTGAAGACAGGACAGAGCATGACACTGCTGTGTGCCCAGGATATGAACCATGAATACATGTACTGGTATCGACAAGACCCAGGCATGGGGCTGAGGCTGATTCATTACTCAGTTGGTGAGGGTACAACTGCCAAAGGAGAGGTCCCTGATGGCTACAATGTCTCCAGATTAAAAAAACAGAATTTCCTGCTGGGGTTGGAGTCGGCTGCTCCCTCCCAAACATCTGTGTACTTCTGTGCCAGCAGCGAGGAGCGGGGGAACACAGATACGCAGTATTTTGGCCCAGGCACCCGGCTGACAGTGCTCG	AATGCTGGTGTCACTCAGACCCCAAAATTCCGGGTCCTGAAGACAGGACAGAGCATGACACTGCTGTGTGCCCAGGATATGAACCATGAATACATGTACTGGTATCGACAAGACCCAGGCATGGGGCTGAGGCTGATTCATTACTCAGTTGGTGAGGGTACAACTGCCAAAGGAGAGGTCCCTGATGGCTACAATGTCTCCAGATTAAAAAAACAGAATTTCCTGCTGGGGTTGGAGTCGGCTGCTCCCTCCCAAACATCTGTGTACTTCTGTGCCAGCAGNNNNNAGCGGGGGNNCACAGATACGCAGTATTTTGGCCCAGGCACCCGGCTGACAGTGCTCG	NAGVTQTPKFRVLKTGQSMTLLCAQDMNHEYMYWYRQDPGMGLRLIHYSVGEGTTAKGEVPDGYNVSRLKKQNFLLGLESAAPSQTSVYFCASSEERGNTDTQYFGPGTRLTVL	NAGVTQTPKFRVLKTGQSMTLLCAQDMNHEYMYWYRQDPGMGLRLIHYSVGEGTTAKGEVPDGYNVSRLKKQNFLLGLESAAPSQTSVYFCASXXXRGXTDTQYFGPGTRLTVL	1	281	287	294	297	343	AATGCTGGTGTCACTCAGACCCCAAAATTCCGGGTCCTGAAGACAGGACAGAGCATGACACTGCTGTGTGCCCAGGATATGAACCATGAATACATGTACTGGTATCGACAAGACCCAGGCATGGGGCTGAGGCTGATTCATTACTCAGTTGGTGAGGGTACAACTGCCAAAGGAGAGGTCCCTGATGGCTACAATGTCTCCAGATTAAAAAAACAGAATTTCCTGCTGGGGTTGGAGTCGGCTGCTCCCTCCCAAACATCTGTGTACTTCTGTGCCAGCAG	NAGVTQTPKFRVLKTGQSMTLLCAQDMNHEYMYWYRQDPGMGLRLIHYSVGEGTTAKGEVPDGYNVSRLKKQNFLLGLESAAPSQTSVYFCAS	AATGCTGGTGTCACTCAGACCCCAAAATTCCGGGTCCTGAAGACAGGACAGAGCATGACACTGCTGTGTGCCCAGGATATGAACCATGAATACATGTACTGGTATCGACAAGACCCAGGCATGGGGCTGAGGCTGATTCATTACTCAGTTGGTGAGGGTACAACTGCCAAAGGAGAGGTCCCTGATGGCTACAATGTCTCCAGATTAAAAAAACAGAATTTCCTGCTGGGGTTGGAGTCGGCTGCTCCCTCCCAAACATCTGTGTACTTCTGTGCCAGCAG	NAGVTQTPKFRVLKTGQSMTLLCAQDMNHEYMYWYRQDPGMGLRLIHYSVGEGTTAKGEVPDGYNVSRLKKQNFLLGLESAAPSQTSVYFCAS	AGCGGGGG	RG	AGCGGGGG	RG	CACAGATACGCAGTATTTTGGCCCAGGCACCCGGCTGACAGTGCTCG	TDTQYFGPGTRLTVL	CACAGATACGCAGTATTTTGGCCCAGGCACCCGGCTGACAGTGCTCG	TDTQYFGPGTRLTVL	AATGCTGGTGTCACTCAGACCCCAAAATTCCGGGTCCTGAAGACAGGACAGAGCATGACACTGCTGTGTGCCCAGGAT	NAGVTQTPKFRVLKTGQSMTLLCAQD	ATGAACCATGAATAC	MNHEY	ATGTACTGGTATCGACAAGACCCAGGCATGGGGCTGAGGCTGATTCATTAC	MYWYRQDPGMGLRLIHY	TCAGTTGGTGAGGGTACA	SVGEGT
Pat726	KW11	TACGGATTCTTGGGTA	TCRbeta	tig00000396_TACGGATTCTTGGGTA	956	108	1	AATGCTGGTGTCACTCAGACCCCAAAATTCCAGGTCCTGAAGACAGGACAGAGCATGACACTGCAGTGTGCCCAGGATATGAACCATGAATACATGTCCTGGTATCGACAAGACCCAGGCATGGGGCTGAGGCTGATTCATTACTCAGTTGGTGCTGGTATCACTGACCAAGGAGAAGTCCCCAATGGCTACAATGTCTCCAGATCAACCACAGAGGATTTCCCGCTCAGGCTGCTGTCGGCTGCTCCCTCCCAGACATCTGTGTACTTCTGTGCCAGCAGTTCCTTACGATCCTCATCACCCACCACCGGGGAGCTGTTTTTTGGAGAAGGCTCTAGGCTGACCGTACTGG	NAGVTQTPKFQVLKTGQSMTLQCAQDMNHEYMSWYRQDPGMGLRLIHYSVGAGITDQGEVPNGYNVSRSTTEDFPLRLLSAAPSQTSVYFCASSSLRSSSPTTGELFFGEGSRLTVL	TRB	F	T	F	T	F	T	TRBV6-5*01		TRBJ2-2*01	AATGCTGGTGTCACTCAGACCCCAAAATTCCAGGTCCTGAAGACAGGACAGAGCATGACACTGCAGTGTGCCCAGGATATGAACCATGAATACATGTCCTGGTATCGACAAGACCCAGGCATGGGGCTGAGGCTGATTCATTACTCAGTTGGTGCTGGTATCACTGACCAAGGAGAAGTCCCCAATGGCTACAATGTCTCCAGATCAACCACAGAGGATTTCCCGCTCAGGCTGCTGTCGGCTGCTCCCTCCCAGACATCTGTGTACTTCTGTGCCAGCAGTTCCTTACGATCCTCATCACCCACCACCGGGGAGCTGTTTTTTGGAGAAGGCTCTAGGCTGACCGTACTGG	AATGCTGGTGTCACTCAGACCCCAAAATTCCAGGTCCTGAAGACAGGACAGAGCATGACACTGCAGTGTGCCCAGGATATGAACCATGAATACATGTCCTGGTATCGACAAGACCCAGGCATGGGGCTGAGGCTGATTCATTACTCAGTTGGTGCTGGTATCACTGACCAAGGAGAAGTCCCCAATGGCTACAATGTCTCCAGATCAACCACAGAGGATTTCCCGCTCAGGCTGCTGTCGGCTGCTCCCTCCCAGACATCTGTGTACTTCTGTGCCAGCAGTTACTNNNNNNNNNNNNNNNNNNNCACCGGGGAGCTGTTTTTTGGAGAAGGCTCTAGGCTGACCGTACTGG	NAGVTQTPKFQVLKTGQSMTLQCAQDMNHEYMSWYRQDPGMGLRLIHYSVGAGITDQGEVPNGYNVSRSTTEDFPLRLLSAAPSQTSVYFCASSSLRSSSPTTGELFFGEGSRLTVL	NAGVTQTPKFQVLKTGQSMTLQCAQDMNHEYMSWYRQDPGMGLRLIHYSVGAGITDQGEVPNGYNVSRSTTEDFPLRLLSAAPSQTSVYFCASSYXXXXXXXTGELFFGEGSRLTVL	1	286			306	352	AATGCTGGTGTCACTCAGACCCCAAAATTCCAGGTCCTGAAGACAGGACAGAGCATGACACTGCAGTGTGCCCAGGATATGAACCATGAATACATGTCCTGGTATCGACAAGACCCAGGCATGGGGCTGAGGCTGATTCATTACTCAGTTGGTGCTGGTATCACTGACCAAGGAGAAGTCCCCAATGGCTACAATGTCTCCAGATCAACCACAGAGGATTTCCCGCTCAGGCTGCTGTCGGCTGCTCCCTCCCAGACATCTGTGTACTTCTGTGCCAGCAGTTCCT	NAGVTQTPKFQVLKTGQSMTLQCAQDMNHEYMSWYRQDPGMGLRLIHYSVGAGITDQGEVPNGYNVSRSTTEDFPLRLLSAAPSQTSVYFCASSS	AATGCTGGTGTCACTCAGACCCCAAAATTCCAGGTCCTGAAGACAGGACAGAGCATGACACTGCAGTGTGCCCAGGATATGAACCATGAATACATGTCCTGGTATCGACAAGACCCAGGCATGGGGCTGAGGCTGATTCATTACTCAGTTGGTGCTGGTATCACTGACCAAGGAGAAGTCCCCAATGGCTACAATGTCTCCAGATCAACCACAGAGGATTTCCCGCTCAGGCTGCTGTCGGCTGCTCCCTCCCAGACATCTGTGTACTTCTGTGCCAGCAGTTACT	NAGVTQTPKFQVLKTGQSMTLQCAQDMNHEYMSWYRQDPGMGLRLIHYSVGAGITDQGEVPNGYNVSRSTTEDFPLRLLSAAPSQTSVYFCASSY					CACCGGGGAGCTGTTTTTTGGAGAAGGCTCTAGGCTGACCGTACTGG	TGELFFGEGSRLTVL	CACCGGGGAGCTGTTTTTTGGAGAAGGCTCTAGGCTGACCGTACTGG	TGELFFGEGSRLTVL	AATGCTGGTGTCACTCAGACCCCAAAATTCCAGGTCCTGAAGACAGGACAGAGCATGACACTGCAGTGTGCCCAGGAT	NAGVTQTPKFQVLKTGQSMTLQCAQD	ATGAACCATGAATAC	MNHEY	ATGTCCTGGTATCGACAAGACCCAGGCATGGGGCTGAGGCTGATTCATTAC	MSWYRQDPGMGLRLIHY	TCAGTTGGTGCTGGTATC	SVGAGI
Pat_1585	KW11	AAACGGGAGATCTGAA	TCRbeta	tig00000006_AAACGGGAGATCTGAA	789	500	1	GATTCTGGAGTCACACAAACCCCAAAGCACCTGATCACAGCAACTGGACAGCGAGTGACGCTGAGATGCTCCCCTAGGTCTGGAGACCTCTCTGTGTACTGGTACCAACAGAGCCTGGACCAGGGCCTCCAGTTCCTCATTCAGTATTATAATGGAGAAGAGAGAGCAAAAGGAAACATTCTTGAACGATTCTCCGCACAACAGTTCCCTGACTTGCACTCTGAACTAAACCTGAGCTCTCTGGAGCTGGGGGACTCAGCTTTGTATTTCTGTGCCAGCAGCCTGGCGACTAGCAGCTACACAGATACGCAGTATTTTGGCCCAGGCACCCGGCTGACAGTGCTCG	DSGVTQTPKHLITATGQRVTLRCSPRSGDLSVYWYQQSLDQGLQFLIQYYNGEERAKGNILERFSAQQFPDLHSELNLSSLELGDSALYFCASSLATSSYTDTQYFGPGTRLTVL	TRB	F	T	F	T	F	T	TRBV9*01	TRBD2*01	TRBJ2-3*01	GATTCTGGAGTCACACAAACCCCAAAGCACCTGATCACAGCAACTGGACAGCGAGTGACGCTGAGATGCTCCCCTAGGTCTGGAGACCTCTCTGTGTACTGGTACCAACAGAGCCTGGACCAGGGCCTCCAGTTCCTCATTCAGTATTATAATGGAGAAGAGAGAGCAAAAGGAAACATTCTTGAACGATTCTCCGCACAACAGTTCCCTGACTTGCACTCTGAACTAAACCTGAGCTCTCTGGAGCTGGGGGACTCAGCTTTGTATTTCTGTGCCAGCAGCCTGGCGACTAGCAGCTACACAGATACGCAGTATTTTGGCCCAGGCACCCGGCTGACAGTGCTCG	GATTCTGGAGTCACACAAACCCCAAAGCACCTGATCACAGCAACTGGACAGCGAGTGACGCTGAGATGCTCCCCTAGGTCTGGAGACCTCTCTGTGTACTGGTACCAACAGAGCCTGGACCAGGGCCTCCAGTTCCTCATTCAGTATTATAATGGAGAAGAGAGAGCAAAAGGAAACATTCTTGAACGATTCTCCGCACAACAGTTCCCTGACTTGCACTCTGAACTAAACCTGAGCTCTCTGGAGCTGGGGGACTCAGCTTTGTATTTCTGTGCCAGCAGCNNNNNGACTAGCNNNNNCACAGATACGCAGTATTTTGGCCCAGGCACCCGGCTGACAGTGCTCG	DSGVTQTPKHLITATGQRVTLRCSPRSGDLSVYWYQQSLDQGLQFLIQYYNGEERAKGNILERFSAQQFPDLHSELNLSSLELGDSALYFCASSLATSSYTDTQYFGPGTRLTVL	DSGVTQTPKHLITATGQRVTLRCSPRSGDLSVYWYQQSLDQGLQFLIQYYNGEERAKGNILERFSAQQFPDLHSELNLSSLELGDSALYFCASSXXTSXXTDTQYFGPGTRLTVL	1	282	288	294	300	346	GATTCTGGAGTCACACAAACCCCAAAGCACCTGATCACAGCAACTGGACAGCGAGTGACGCTGAGATGCTCCCCTAGGTCTGGAGACCTCTCTGTGTACTGGTACCAACAGAGCCTGGACCAGGGCCTCCAGTTCCTCATTCAGTATTATAATGGAGAAGAGAGAGCAAAAGGAAACATTCTTGAACGATTCTCCGCACAACAGTTCCCTGACTTGCACTCTGAACTAAACCTGAGCTCTCTGGAGCTGGGGGACTCAGCTTTGTATTTCTGTGCCAGCAGC	DSGVTQTPKHLITATGQRVTLRCSPRSGDLSVYWYQQSLDQGLQFLIQYYNGEERAKGNILERFSAQQFPDLHSELNLSSLELGDSALYFCASS	GATTCTGGAGTCACACAAACCCCAAAGCACCTGATCACAGCAACTGGACAGCGAGTGACGCTGAGATGCTCCCCTAGGTCTGGAGACCTCTCTGTGTACTGGTACCAACAGAGCCTGGACCAGGGCCTCCAGTTCCTCATTCAGTATTATAATGGAGAAGAGAGAGCAAAAGGAAACATTCTTGAACGATTCTCCGCACAACAGTTCCCTGACTTGCACTCTGAACTAAACCTGAGCTCTCTGGAGCTGGGGGACTCAGCTTTGTATTTCTGTGCCAGCAGC	DSGVTQTPKHLITATGQRVTLRCSPRSGDLSVYWYQQSLDQGLQFLIQYYNGEERAKGNILERFSAQQFPDLHSELNLSSLELGDSALYFCASS	GACTAGC	TS	GACTAGC	TS	CACAGATACGCAGTATTTTGGCCCAGGCACCCGGCTGACAGTGCTCG	TDTQYFGPGTRLTVL	CACAGATACGCAGTATTTTGGCCCAGGCACCCGGCTGACAGTGCTCG	TDTQYFGPGTRLTVL	GATTCTGGAGTCACACAAACCCCAAAGCACCTGATCACAGCAACTGGACAGCGAGTGACGCTGAGATGCTCCCCTAGG	DSGVTQTPKHLITATGQRVTLRCSPR	TCTGGAGACCTCTCT	SGDLS	GTGTACTGGTACCAACAGAGCCTGGACCAGGGCCTCCAGTTCCTCATTCAG	VYWYQQSLDQGLQFLIQ	TATTATAATGGAGAAGAG	YYNGEE
Pat_1585	KW11	AAGACCTCAATAGCAA	TCRbeta	tig00000006_AAGACCTCAATAGCAA	1433	161	1	GCTGCTGGAGTCATCCAGTCCCCAAGACATCTGATCAAAGAAAAGAGGGAAACAGCCACTCTGAAATGCTATCCTATCCCTAGACACGACACTGTCTACTGGTACCAGCAGGGTCCAGGTCAGGACCCCCAGTTCCTCATTTCGTTTTATGAAAAGATGCAGAGCGATAAAGGAAGCATCCCTGATCGATTCTCAGCTCAACAGTTCAGTGACTATCATTCTGAACTGAACATGAGCTCCTTGGAGCTGGGGGACTCAGCCCTGTACTTCTGTGCCAGCAGCCACGCCGGGACCACCGTTTACGAGCAGTACTTCGGGCCGGGCACCAGGCTCACGGTCACAG	AAGVIQSPRHLIKEKRETATLKCYPIPRHDTVYWYQQGPGQDPQFLISFYEKMQSDKGSIPDRFSAQQFSDYHSELNMSSLELGDSALYFCASSHAGTTVYEQYFGPGTRLTVT	TRB	F	T	F	T	F	T	TRBV13*01	TRBD1*01	TRBJ2-7*01	GCTGCTGGAGTCATCCAGTCCCCAAGACATCTGATCAAAGAAAAGAGGGAAACAGCCACTCTGAAATGCTATCCTATCCCTAGACACGACACTGTCTACTGGTACCAGCAGGGTCCAGGTCAGGACCCCCAGTTCCTCATTTCGTTTTATGAAAAGATGCAGAGCGATAAAGGAAGCATCCCTGATCGATTCTCAGCTCAACAGTTCAGTGACTATCATTCTGAACTGAACATGAGCTCCTTGGAGCTGGGGGACTCAGCCCTGTACTTCTGTGCCAGCAGCCACGCCGGGACCACCGTTTACGAGCAGTACTTCGGGCCGGGCACCAGGCTCACGGTCACAG	GCTGCTGGAGTCATCCAGTCCCCAAGACATCTGATCAAAGAAAAGAGGGAAACAGCCACTCTGAAATGCTATCCTATCCCTAGACACGACACTGTCTACTGGTACCAGCAGGGTCCAGGTCAGGACCCCCAGTTCCTCATTTCGTTTTATGAAAAGATGCAGAGCGATAAAGGAAGCATCCCTGATCGATTCTCAGCTCAACAGTTCAGTGACTATCATTCTGAACTGAACATGAGCTCCTTGGAGCTGGGGGACTCAGCCCTGTACTTCTGTGCCAGCAGCNNNNNNGGGACNNNNNNNTACGAGCAGTACTTCGGGCCGGGCACCAGGCTCACGGTCACAG	AAGVIQSPRHLIKEKRETATLKCYPIPRHDTVYWYQQGPGQDPQFLISFYEKMQSDKGSIPDRFSAQQFSDYHSELNMSSLELGDSALYFCASSHAGTTVYEQYFGPGTRLTVT	AAGVIQSPRHLIKEKRETATLKCYPIPRHDTVYWYQQGPGQDPQFLISFYEKMQSDKGSIPDRFSAQQFSDYHSELNMSSLELGDSALYFCASSXXGTXXYEQYFGPGTRLTVT	1	282	289	293	301	343	GCTGCTGGAGTCATCCAGTCCCCAAGACATCTGATCAAAGAAAAGAGGGAAACAGCCACTCTGAAATGCTATCCTATCCCTAGACACGACACTGTCTACTGGTACCAGCAGGGTCCAGGTCAGGACCCCCAGTTCCTCATTTCGTTTTATGAAAAGATGCAGAGCGATAAAGGAAGCATCCCTGATCGATTCTCAGCTCAACAGTTCAGTGACTATCATTCTGAACTGAACATGAGCTCCTTGGAGCTGGGGGACTCAGCCCTGTACTTCTGTGCCAGCAGC	AAGVIQSPRHLIKEKRETATLKCYPIPRHDTVYWYQQGPGQDPQFLISFYEKMQSDKGSIPDRFSAQQFSDYHSELNMSSLELGDSALYFCASS	GCTGCTGGAGTCATCCAGTCCCCAAGACATCTGATCAAAGAAAAGAGGGAAACAGCCACTCTGAAATGCTATCCTATCCCTAGACACGACACTGTCTACTGGTACCAGCAGGGTCCAGGTCAGGACCCCCAGTTCCTCATTTCGTTTTATGAAAAGATGCAGAGCGATAAAGGAAGCATCCCTGATCGATTCTCAGCTCAACAGTTCAGTGACTATCATTCTGAACTGAACATGAGCTCCTTGGAGCTGGGGGACTCAGCCCTGTACTTCTGTGCCAGCAGC	AAGVIQSPRHLIKEKRETATLKCYPIPRHDTVYWYQQGPGQDPQFLISFYEKMQSDKGSIPDRFSAQQFSDYHSELNMSSLELGDSALYFCASS	GGGAC	GT	GGGAC	GT	TACGAGCAGTACTTCGGGCCGGGCACCAGGCTCACGGTCACAG	YEQYFGPGTRLTVT	TACGAGCAGTACTTCGGGCCGGGCACCAGGCTCACGGTCACAG	YEQYFGPGTRLTVT	GCTGCTGGAGTCATCCAGTCCCCAAGACATCTGATCAAAGAAAAGAGGGAAACAGCCACTCTGAAATGCTATCCTATC	AAGVIQSPRHLIKEKRETATLKCYPI	CCTAGACACGACACT	PRHDT	GTCTACTGGTACCAGCAGGGTCCAGGTCAGGACCCCCAGTTCCTCATTTCG	VYWYQQGPGQDPQFLIS	TTTTATGAAAAGATGCAG	FYEKMQ
Pat_1585	KW11	AGAATAGGTTAAGACA	TCRbeta	tig00000004_AGAATAGGTTAAGACA	535	466	1	GACACTGAAGTTACCCAGACACCAAAACACCTGGTCATGGGAATGACAAATAAGAAGTCTTTGAAATGTGAACAACATATGGGGCACAGGGCTATGTATTGGTACAAGCAGAAAGCTAAGAAGCCACCGGAGCTCATGTTTGTCTACAGCTATGAGAAACTCTCTATAAATGAAAGTGTGCCAAGTCGCTTCTCACCTGAATGCCCCAACAGCTCTCTCTTAAACCTTCACCTACACGCCCTGCAGCCAGAAGACTCCGCCGTGTATCTCTGTGCCAGCAGCTCTGGACAGGCTCAAGAGACCCAGTACTTCGGGCCAGGCACGCGGCTCCTGGTGCTCG	DTEVTQTPKHLVMGMTNKKSLKCEQHMGHRAMYWYKQKAKKPPELMFVYSYEKLSINESVPSRFSPECPNSSLLNLHLHALQPEDSAVYLCASSSGQAQETQYFGPGTRLLVL	TRB	F	T	F	T	F	T	TRBV4-1*01	TRBD1*01	TRBJ2-5*01	GACACTGAAGTTACCCAGACACCAAAACACCTGGTCATGGGAATGACAAATAAGAAGTCTTTGAAATGTGAACAACATATGGGGCACAGGGCTATGTATTGGTACAAGCAGAAAGCTAAGAAGCCACCGGAGCTCATGTTTGTCTACAGCTATGAGAAACTCTCTATAAATGAAAGTGTGCCAAGTCGCTTCTCACCTGAATGCCCCAACAGCTCTCTCTTAAACCTTCACCTACACGCCCTGCAGCCAGAAGACTCCGCCGTGTATCTCTGTGCCAGCAGCTCTGGACAGGCTCAAGAGACCCAGTACTTCGGGCCAGGCACGCGGCTCCTGGTGCTCG	GACACTGAAGTTACCCAGACACCAAAACACCTGGTCATGGGAATGACAAATAAGAAGTCTTTGAAATGTGAACAACATATGGGGCACAGGGCTATGTATTGGTACAAGCAGAAAGCTAAGAAGCCACCGGAGCTCATGTTTGTCTACAGCTATGAGAAACTCTCTATAAATGAAAGTGTGCCAAGTCGCTTCTCACCTGAATGCCCCAACAGCTCTCTCTTAAACCTTCACCTACACGCCCTGCAGCCAGAAGACTCAGCCCTGTATCTCTGCGCCAGCAGCNNNGGACAGGNNCAAGAGACCCAGTACTTCGGGCCAGGCACGCGGCTCCTGGTGCTCG	DTEVTQTPKHLVMGMTNKKSLKCEQHMGHRAMYWYKQKAKKPPELMFVYSYEKLSINESVPSRFSPECPNSSLLNLHLHALQPEDSAVYLCASSSGQAQETQYFGPGTRLLVL	DTEVTQTPKHLVMGMTNKKSLKCEQHMGHRAMYWYKQKAKKPPELMFVYSYEKLSINESVPSRFSPECPNSSLLNLHLHALQPEDSALYLCASSXGQXQETQYFGPGTRLLVL	1	282	286	292	295	340	GACACTGAAGTTACCCAGACACCAAAACACCTGGTCATGGGAATGACAAATAAGAAGTCTTTGAAATGTGAACAACATATGGGGCACAGGGCTATGTATTGGTACAAGCAGAAAGCTAAGAAGCCACCGGAGCTCATGTTTGTCTACAGCTATGAGAAACTCTCTATAAATGAAAGTGTGCCAAGTCGCTTCTCACCTGAATGCCCCAACAGCTCTCTCTTAAACCTTCACCTACACGCCCTGCAGCCAGAAGACTCCGCCGTGTATCTCTGTGCCAGCAGC	DTEVTQTPKHLVMGMTNKKSLKCEQHMGHRAMYWYKQKAKKPPELMFVYSYEKLSINESVPSRFSPECPNSSLLNLHLHALQPEDSAVYLCASS	GACACTGAAGTTACCCAGACACCAAAACACCTGGTCATGGGAATGACAAATAAGAAGTCTTTGAAATGTGAACAACATATGGGGCACAGGGCTATGTATTGGTACAAGCAGAAAGCTAAGAAGCCACCGGAGCTCATGTTTGTCTACAGCTATGAGAAACTCTCTATAAATGAAAGTGTGCCAAGTCGCTTCTCACCTGAATGCCCCAACAGCTCTCTCTTAAACCTTCACCTACACGCCCTGCAGCCAGAAGACTCAGCCCTGTATCTCTGCGCCAGCAGC	DTEVTQTPKHLVMGMTNKKSLKCEQHMGHRAMYWYKQKAKKPPELMFVYSYEKLSINESVPSRFSPECPNSSLLNLHLHALQPEDSALYLCASS	GGACAGG	GQ	GGACAGG	GQ	CAAGAGACCCAGTACTTCGGGCCAGGCACGCGGCTCCTGGTGCTCG	QETQYFGPGTRLLVL	CAAGAGACCCAGTACTTCGGGCCAGGCACGCGGCTCCTGGTGCTCG	QETQYFGPGTRLLVL	GACACTGAAGTTACCCAGACACCAAAACACCTGGTCATGGGAATGACAAATAAGAAGTCTTTGAAATGTGAACAACAT	DTEVTQTPKHLVMGMTNKKSLKCEQH	ATGGGGCACAGGGCT	MGHRA	ATGTATTGGTACAAGCAGAAAGCTAAGAAGCCACCGGAGCTCATGTTTGTC	MYWYKQKAKKPPELMFV	TACAGCTATGAGAAACTC	YSYEKL
Pat_1585	KW11	AGATTGCGTTCAACCA	TCRbeta	tig00000001_AGATTGCGTTCAACCA	1087	501	1	AATGCTGGTGTCACTCAGACCCCAAAATTCCAGGTCCTGAAGACAGGACAGAGCATGACACTGCAGTGTGCCCAGGATATGAACCATGAATACATGTCCTGGTATCGACAAGACCCAGGCATGGGGCTGAGGCTGATTCATTACTCAGTTGGTGCTGGTATCACTGACCAAGGAGAAGTCCCCAATGGCTACAATGTCTCCAGATCAACCACAGAGGATTTCCCGCTCAGGCTGCTGTCGGCTGCTCCCTCCCAGACATCTGTGTACTTCTGTGCCAGCAGCCAACCTACGGGGGCTGAGACAGATACGCAGTATTTTGGCCCAGGCACCCGGCTGACAGTGCTCG	NAGVTQTPKFQVLKTGQSMTLQCAQDMNHEYMSWYRQDPGMGLRLIHYSVGAGITDQGEVPNGYNVSRSTTEDFPLRLLSAAPSQTSVYFCASSQPTGAETDTQYFGPGTRLTVL	TRB	F	T	F	T	F	T	TRBV6-5*01	TRBD1*01	TRBJ2-3*01	AATGCTGGTGTCACTCAGACCCCAAAATTCCAGGTCCTGAAGACAGGACAGAGCATGACACTGCAGTGTGCCCAGGATATGAACCATGAATACATGTCCTGGTATCGACAAGACCCAGGCATGGGGCTGAGGCTGATTCATTACTCAGTTGGTGCTGGTATCACTGACCAAGGAGAAGTCCCCAATGGCTACAATGTCTCCAGATCAACCACAGAGGATTTCCCGCTCAGGCTGCTGTCGGCTGCTCCCTCCCAGACATCTGTGTACTTCTGTGCCAGCAGCCAACCTACGGGGGCTGAGACAGATACGCAGTATTTTGGCCCAGGCACCCGGCTGACAGTGCTCG	AATGCTGGTGTCACTCAGACCCCAAAATTCCAGGTCCTGAAGACAGGACAGAGCATGACACTGCAGTGTGCCCAGGATATGAACCATGAATACATGTCCTGGTATCGACAAGACCCAGGCATGGGGCTGAGGCTGATTCATTACTCAGTTGGTGCTGGTATCACTGACCAAGGAGAAGTCCCCAATGGCTACAATGTCTCCAGATCAACCACAGAGGATTTCCCGCTCAGGCTGCTGTCGGCTGCTCCCTCCCAGACATCTGTGTACTTCTGTGCCAGCAGNNNNNNNNNGGGGGCNNNNACAGATACGCAGTATTTTGGCCCAGGCACCCGGCTGACAGTGCTCG	NAGVTQTPKFQVLKTGQSMTLQCAQDMNHEYMSWYRQDPGMGLRLIHYSVGAGITDQGEVPNGYNVSRSTTEDFPLRLLSAAPSQTSVYFCASSQPTGAETDTQYFGPGTRLTVL	NAGVTQTPKFQVLKTGQSMTLQCAQDMNHEYMSWYRQDPGMGLRLIHYSVGAGITDQGEVPNGYNVSRSTTEDFPLRLLSAAPSQTSVYFCASXXXXGAXTDTQYFGPGTRLTVL	1	281	291	296	301	346	AATGCTGGTGTCACTCAGACCCCAAAATTCCAGGTCCTGAAGACAGGACAGAGCATGACACTGCAGTGTGCCCAGGATATGAACCATGAATACATGTCCTGGTATCGACAAGACCCAGGCATGGGGCTGAGGCTGATTCATTACTCAGTTGGTGCTGGTATCACTGACCAAGGAGAAGTCCCCAATGGCTACAATGTCTCCAGATCAACCACAGAGGATTTCCCGCTCAGGCTGCTGTCGGCTGCTCCCTCCCAGACATCTGTGTACTTCTGTGCCAGCAG	NAGVTQTPKFQVLKTGQSMTLQCAQDMNHEYMSWYRQDPGMGLRLIHYSVGAGITDQGEVPNGYNVSRSTTEDFPLRLLSAAPSQTSVYFCAS	AATGCTGGTGTCACTCAGACCCCAAAATTCCAGGTCCTGAAGACAGGACAGAGCATGACACTGCAGTGTGCCCAGGATATGAACCATGAATACATGTCCTGGTATCGACAAGACCCAGGCATGGGGCTGAGGCTGATTCATTACTCAGTTGGTGCTGGTATCACTGACCAAGGAGAAGTCCCCAATGGCTACAATGTCTCCAGATCAACCACAGAGGATTTCCCGCTCAGGCTGCTGTCGGCTGCTCCCTCCCAGACATCTGTGTACTTCTGTGCCAGCAG	NAGVTQTPKFQVLKTGQSMTLQCAQDMNHEYMSWYRQDPGMGLRLIHYSVGAGITDQGEVPNGYNVSRSTTEDFPLRLLSAAPSQTSVYFCAS	GGGGGC	GA	GGGGGC	GA	ACAGATACGCAGTATTTTGGCCCAGGCACCCGGCTGACAGTGCTCG	TDTQYFGPGTRLTVL	ACAGATACGCAGTATTTTGGCCCAGGCACCCGGCTGACAGTGCTCG	TDTQYFGPGTRLTVL	AATGCTGGTGTCACTCAGACCCCAAAATTCCAGGTCCTGAAGACAGGACAGAGCATGACACTGCAGTGTGCCCAGGAT	NAGVTQTPKFQVLKTGQSMTLQCAQD	ATGAACCATGAATAC	MNHEY	ATGTCCTGGTATCGACAAGACCCAGGCATGGGGCTGAGGCTGATTCATTAC	MSWYRQDPGMGLRLIHY	TCAGTTGGTGCTGGTATC	SVGAGI
[truncated: 259 more rows]
[truncated: 134 more columns]
